# Supplementary material for: GWAS in a Collection of Bulgarian Old and Modern Bread Wheat Accessions Uncovers Novel Genomic Loci for Grain Protein Content and Thousand Kernel Weight
Source: Preprints.org preprint supplement (doi:10.20944/preprints202402.1069.v1), 2024-02-19
Supplement: Supplementary file 1 [file supplementary]

## Sheet: Table-S1-GPC
Table S1. Information about the 179 wheat accessions from Bulgaria and summary statistics for grain protein content (GPC) from three crop seasons (harvests 2014, 2017, 2021), average over the seasons and the average best linear unbiased estimator (BLUE) values
aMembership of the accessions to a sub-population is as determined in [32].
Accession name	Accession status	Release year of modern varieties	Subpopulation (SP)a	GPC (%) 2014	GPC (%) 2017	GPC (%) 2021	GPC (%) average	Std. Dev.	St. Err.	GPC (%) BLUE	Known pedigree
Aglika	Modern	1997	SP1	13.099	13.4843	13.3953	13.3262	0.226981	0.0756602	13.3916	2558-128 (incl. Bez-1) х Pliska
Aheloj	Modern	1987	SP1	13.6609	8.016	13.5867	11.7545	2.59334	0.864447	13.6791	na
Albena	Modern	1996	SP1	11.3203	12.1677	13.8777	12.4552	1.13023	0.376743	12.7588	selection from F-1959-W 1-2 (Romania)
Altimir-67	Modern	1979	SP1	10.6017	12.6763	12.4717	11.9166	0.991322	0.330441	12.6303	Skorospelka 35 x Mexipak
Anna	Modern	2005	SP1	11.7383	12.3763	12.3807	12.1651	0.345161	0.115054	12.9007	Lepoklasa x Pryaspa
Antonovka	Modern	2004	SP1	10.4327	11.8323	14.4683	12.2444	1.77502	0.591674	12.3943	na
Asenovka	Modern	1987	SP1	11.778	9.09433	15.4983	12.1236	2.79705	0.932349	13.1886	na
Avangard	Modern	after 2000	SP1	14.9167	12.308	15.126	14.1169	1.3603	0.453433	14.0901	Pobeda + Sodium azide 1 mM
Bolyarka	Modern	2004	SP1	8.05033	12.633	14.556	11.7464	2.12821	0.709404	11.6134	Pryaspa x F 2076 W2-11 (Romania)
Boryana	Modern	1999	SP1	12.5227	12.6103	13.507	12.88	0.477028	0.159009	13.3931	(9855-18/NS-314 x Avrora) х Momchil
Burgas-1	Old		SP1	12.8893	10.1117	13.9423	12.3144	1.71519	0.571729	13.3964	? x Neuzucht
Charodejka	Modern	1979	SP1	11.3297	11.9325	11.398	11.5534	0.293645	0.0978816	12.8141	Roussalka (improved) х Zlatna dolina
Demetra	Modern	2004	SP1	12.3007	13.4237	11.3053	12.3432	0.918825	0.306275	13.1119	2182-51 х 1613/86-1
Diamant	Modern	1996	SP1	13.6723	13.0223	14.7213	13.8053	0.745134	0.248378	13.7207	Yubilej x Sadovo-1
Dobrotitsa	Modern	1992	SP1	14.5293	14.4477	15.8363	14.9378	0.682707	0.227569	13.8489	2558-128 (incl. Bez-1) х 4199 х 5460-1039
Dobrudzhanka	Old		SP1	12.162	13.851	15.3863	13.7998	1.40393	0.467975	13.1475
Dona	Modern	2007	SP1	13.6683	12.73	14.9077	13.7687	0.947091	0.315697	13.622	na
Dragana	Modern	2009	SP1	10.7617	11.688	12.8953	11.7817	0.930723	0.310241	12.6048	Miryana (=Sredets-68 x Trakya)+gamma rays x Nadya (Russia)
Elitsa	Modern	1997	SP1	12.8803	12.8953	12.8423	12.8727	0.0465886	0.0155295	13.3448	Yuzhnaya Zarya x Pliska
Enola	Modern	1997	SP1	13.811	14.5617	14.0887	14.1538	0.329615	0.109872	13.6638	(Kiten х 4360-5) х Trakiya) х Hersonskaya-552
Erythrospermum 19-16	Old		SP1	12.7647	12.5943	13.857	13.072	0.653973	0.217991	13.4777
Fermer	Modern	2009	SP1	14.3013	13.87	14.5407	14.2373	0.303712	0.101237	13.9089	Pobeda + gamma irradiation 50 Gy
Ferrugineum-2	Old		SP1	11.2157	10.908	14.6643	12.2627	1.80674	0.602248	12.7976	San Pastore x S-134
Galateya	Modern	1999	SP1	13.9477	14.0603	14.7347	14.2476	0.378144	0.126048	13.6739	Pliska х 2367-8 (incl. Bez-1, Libellula)
Gladiator-113	Modern	1992	SP1	12.4107	12.6273	13.1477	12.7286	0.335986	0.111995	13.18	(Skorospelka 35 х Mexipak) х Siete Cerros
Goritsa	Modern	2010	SP1	14.4497	14.497	14.6073	14.518	0.0898499	0.02995	13.8996	na
Hrabrets	Modern	na	SP1	13.5547	12.7087	14.556	13.6064	0.818017	0.272672	13.8413	Rekord x Slavyanka
Ideal	Modern	1999	SP1	14.1627	13.2717	15.903	14.4458	1.16873	0.389577	13.6883	М-51-112 (incl. Bez-1) х М-524 (incl. Sadovo-1)
Iveta	Modern	2000	SP1	12.928	12.7313	14.6813	13.4469	0.947462	0.315821	13.3121	Obrij x Mironovskaya 61
Joana	Modern	after 2000	SP1	12.637	12.6343	15.8747	13.7153	1.62216	0.540721	13.4458	Pobeda + gamma irradiation 50 Gy
Kaliakra-2	Modern	1968	SP1	12.601	12.445	14.7913	13.2791	1.13758	0.379193	13.3032	(Ibo-1828 x La Pervision) x Bez-1 х Skorospelka-12
Kalina	Modern	2010	SP1	13.184	13.29	14.8527	13.7756	0.811837	0.270612	13.3713	Prostor x Enola x Prostor
Kaloyan	Modern	1981	SP1	13.203	12.8897	13.8057	13.2994	0.417193	0.139064	13.4869	(Cnem х Avrora) х Roussalka
Karat	Modern	1999	SP1	13.285	12.581	14.4227	13.4296	0.815462	0.271821	13.5249	2811-2 (incl. Bez-1, Zlatna dolina, Sava) х 371-2023
Kardam	Modern	1980	SP1	13.7237	13.7217	13.6973	13.7142	0.0368876	0.0122959	13.7383	(19-16-14 х NS-171-2) х Avrora
Karina	Modern	2004	SP1	14.322	11.8997	16.34	14.1872	1.93005	0.643351	13.7727	Antilema 1-8 x Pliska
Katya	Modern	1982	SP1	14.417	13.723	16.4333	14.8578	1.21986	0.40662	13.9198	Hebros x Bez-1
Kiara	Modern	2010	SP1	13.133	12.992	14.7577	13.6276	0.853542	0.284514	13.4118	Klassic x Enola
Korona	Modern	2006	SP1	12.2797	13.6417	11.839	12.5868	0.82683	0.27561	13.1215	(Pryaspa х Ol'viya) х (Manital х Flamura 80 )
Krapets	Modern	1982	SP1	15.2037	15.0747	16.2033	15.4939	0.626702	0.208901	14.1445	S-233 х (S-134 х San Pastore) x Bez-1 х Bez-1x NS-171-2
Krasen	Modern	1977	SP1	13.3283	10.3037	14.9097	12.8472	2.02712	0.675708	13.5629	na
Kristal	Modern	1996	SP1	14.0143	12.8783	15.0157	13.9694	0.927217	0.309072	13.4127	(F9-75 x (Langedog x 19-16 x Avrora) х 7523-11
Kristi	Modern	2005	SP1	13.2313	13.948	12.2377	13.139	0.750934	0.250311	13.3827	Miryana (=Sredets-68 x Trakya)+gamma rays x Pryaspa x Enola
Kristora	Modern	after 2000	SP1	12.7927	12.7983	12.7373	12.7761	0.104613	0.034871	13.3023	Kristal х Todora
Lada	Modern	1981	SP1	12.715	12.2667	13.224	12.7352	0.419908	0.139969	13.2643	(Etoile de Choisy x Bez-4) x Mexipak
Laska	Modern	1997	SP1	13.1367	13.097	15.5287	13.9208	1.21008	0.403361	13.3426	F-2498-W1-2 (Romania) х Obrij
Lazarka	Modern	2007	SP1	14.1837	14.6187	16.7583	15.1869	1.19704	0.399013	13.724	Yuna x Flamura 85
Lider	Modern	2010	SP1	14.5827	11.558	16.9883	14.3763	2.35947	0.786491	13.9073	Roussalka x Ae. variabilis x Trayana
Liliya	Modern	2000	SP1	12.808	14.2557	12.6673	13.2437	0.776039	0.25868	13.2251	Pryaspa х Mironovskaya 27
Lozen-6	Modern	2003	SP1	15.1733	15.9127	13.8817	14.9892	0.892892	0.297631	14.1203	(T. dicoccum x Ae. crassa) x Avrora
Ludogorie	Modern	2000	SP1	12.884	14.2047	12.468	13.1856	0.78793	0.262643	13.3344	(SO 290/756 х 4888-682) х Pliska) х 4067-622
Lyusil	Modern	2005	SP1	14.3527	14.3433	12.2307	13.6422	1.06124	0.353745	13.9808	selection in line КС 750 (=Yantar х Medven)
Medeya	Modern	1999	SP1	12.7983	13.9557	12.768	13.174	0.588289	0.196096	13.2258	Polukarlik-3 х Yantar
Merilin	Modern	2007	SP1	13.7747	13.564	16.2737	14.5374	1.30586	0.435286	13.6153	Lutescens 598 х kG2852-21 х SIWWSN-T-118-12
Miziya	Modern	2000	SP1	14.1343	14.4323	14.687	14.4179	0.279388	0.0931293	13.7228	Vratsa х 271-63 (Shipka)
Murgavets	Modern	1994	SP1	12.6823	12.923	14.3503	13.3186	0.782026	0.260675	13.3691	Altimir-67 (=Skorospelka-35 x Mexipac) х Sadovo-1
Mustang	Modern	1997	SP1	15.7907	15.7277	16.4997	16.006	0.40346	0.134487	14.4536	Sadovo-1 х S 1503-142 (line from Zimbabwe) х Sadovo Super х Clement
Neda	Modern	2004	SP1	14.176	14.178	14.003	14.119	0.163905	0.0546352	13.6027	GP 2558-128 (incl. Bez-1) х 3746-2 (=Sadovo-1 х Roason)
Niki	Modern	after 2000	SP1	14.0883	14.13	14.104	14.1074	0.0946772	0.0315591	13.9068	na
Nikolaj	Modern	after 2000	SP1	14.1587	13.9993	12.544	13.5673	0.783008	0.261003	13.7959	Bul 5052- Ph x VІІІ F5 kr.19-а2-10
Nivyana	Modern	1999	SP1	11.6947	13.389	11.6203	12.2347	0.89552	0.298507	12.8492	Yantar x Obrij
Nova Zvezda	Modern	after 2000	SP1	13.1193	13.8187	12.4033	13.1138	0.615289	0.205096	13.2512	90-Zong 150 x КС60
Ogosta	Modern	1978	SP1	14.9737	15.094	14.8317	14.9664	0.197789	0.0659297	13.9365	(N 234 х S-13) x Bez-1
Panaceya	Modern	after 2000	SP1	14.2157	14.7933	14.463	14.4907	0.339422	0.113141	13.8672	Pobeda + Sodium azide 1 mM
Petya	Modern	2003	SP1	12.7433	12.5743	13.6497	12.9891	0.505512	0.168504	13.3072	Thesse x 10/108 Karmen
Plamuk	Old		SP1	12.0593	11.047	13.659	12.2551	1.14253	0.380843	13.0945
Pliska	Modern	1981	SP1	14.3943	14.1817	15.62	14.732	0.677759	0.22592	13.7997	(5517-А-5-5-1-Р3) х Roussalka
Pobeda	Modern	1984	SP1	16.1177	16.3573	14.3227	15.5992	0.966572	0.322191	14.4119	T. sphaerococcum x Rotund. x (T. durum x Secale montanum) x Bez-1 х Mexican 225
Polena	Modern	after 2000	SP1	13.505	14.0713	13.686	13.7541	0.300925	0.100308	13.5103	Kristal х Spartanka
Predela	Modern	na	SP1	11.8467	11.8143	12.981	12.214	0.57819	0.19273	13.1747	na
Prelom	Modern	1996	SP1	10.7883	9.56267	17.577	12.6427	3.73966	1.24655	12.5526	Rositsa х Tundzha
Preslav	Modern	1996	SP1	13.6283	13.4103	14.0337	13.6908	0.299083	0.0996944	13.6418	Armada x 9987-29 (incl. Slavyanka)
Progres	Modern	2000	SP1	12.7147	12.2307	14.1513	13.0322	0.866356	0.288785	13.296	15-92 х 1027-1
Pryaspa	Modern	1989	SP1	13.3	12.409	14.161	13.29	0.759167	0.253056	13.3243	Avrora х Era (selection)
Puldin	Modern	na	SP1	11.67	11.3373	13.792	12.2664	1.15505	0.385017	13.022
Rekord	Modern	1973	SP1	16.0513	16.2887	17.406	16.582	0.628347	0.209449	14.261	Yantar х Medven
Roussalka	Modern	1971	SP1	14.1493	13.9233	15.3063	14.4597	0.647694	0.215898	13.7801	S-13 x BAN-54
Sadovo-1	Modern	1974	SP1	12.7017	12.639	12.435	12.5919	0.203013	0.0676709	13.4185	Yubilejna-3 х Bez-1
Sadovo-772	Modern	1996	SP1	12.9293	12.9903	12.886	12.9352	0.120699	0.0402329	13.4693	Skitiya х Sadovo-1
Skitiya	Modern	1980	SP1	12.899	13.0607	13.0263	12.9953	0.0943451	0.0314484	13.3091	Sonora-64 х Kavkaz х Zlatna dolina
Slavejno	Modern	after 2000	SP1	12.1373	11.9283	12.337	12.1342	0.180774	0.060258	13.001	Prelom x Gabrier
Slaven	Modern	after 2000	SP1	12.6883	12.5173	13.1827	12.7961	0.320706	0.106902	13.454	Garant x Bononiya
Slaveya	Modern	2000	SP1	13.224	13.192	13.226	13.214	0.0640605	0.0213535	13.4465	Pliska х 2558-128 х Pliska
Slavyani	Old		SP1	15.1867	12.1547	19.0783	15.4732	3.00618	1.00206	14.2091
Slavyanka	Modern	1975	SP1	13.1633	13.5697	15.1867	13.9732	0.927172	0.309057	13.4823	NS-313 x Bez-1
Sredets-68	Modern	1968	SP1	14.5997	13.528	17.2313	15.1197	1.65104	0.550348	13.9201	Skorospelka 35 х Mexipac
Stolets	Modern	na	SP1	13.973	14.653	14.1553	14.2604	0.326587	0.108862	13.8156	na
Stoyana	Modern	2010	SP1	11.7837	11.094	13.2373	12.0383	0.95156	0.317187	12.9805	2477-2 (=NS 175/2/Libelula/Bez-1) х Slaveya
Strelets	Modern	after 2000	SP1	13.9497	13.2543	15.671	14.2917	1.07818	0.359393	13.6101	Prelom x Super fatua
Svilena	Modern	1994	SP1	13.0723	11.305	13.9537	12.777	1.17212	0.390706	13.3405	(863-А-31 х Super Zlatna) х 76-24-5
Tangra	Modern	1978	SP1	15.504	12.1393	17.0773	14.9069	2.18558	0.728525	14.2898	na
Todora	Modern	1996	SP1	13.697	11.7533	15.164	13.5381	1.48324	0.494414	13.6458	1011-57 х Trayana
Toshevka	Modern	1978	SP1	14.3167	14.391	16.9367	15.2148	1.29233	0.430775	13.8739	NS-314 x Bez-1
Trakiya	Modern	1977	SP1	14.039	14.178	14.6737	14.2969	0.299703	0.099901	13.7069	(Bez-1 х Elia) х Roussalka
Tsarevets	Modern	2008	SP1	12.7987	13.1653	12.7583	12.9074	0.196932	0.0656441	13.337	Zebrets x Katya
Tundzha	Modern	na	SP1	7.64367	6.27767	14.3203	9.41389	3.73461	1.24487	11.5709	na
Vega	Modern	1976	SP1	14.311	15.9163	14.1607	14.796	0.847741	0.28258	13.8908	(No 301 х S-13) х Rannaya-12 х NS-314
Velizara	Modern	2000	SP1	12.941	13.332	12.2457	12.8396	0.480838	0.160279	13.2418	Yantar х Przhevalskaya
Vezhen	Modern	na	SP1	9.23967	6.92733	12.1657	9.44422	2.28036	0.76012	12.0961	na
Vikhar	Modern	after 2000	SP1	14.3487	14.237	15.3653	14.6503	0.553226	0.184409	13.988	Yunak x Flamura 80
Vselena	Modern	after 2000	SP1	10.9173	8.91833	15.6047	11.8134	2.9734	0.991132	12.841	Momchil + Sodium azide 1 mM
Yana	Modern	1991	SP1	14.757	14.4137	15.1147	14.7618	0.317992	0.105997	13.983	na
Yanitsa	Modern	2009	SP1	12.8877	13.9197	13.0967	13.3013	0.47825	0.159417	13.2073	na
Yantar	Modern	1982	SP1	12.9447	14.3147	12.578	13.2791	0.799205	0.266402	13.2225	Avrora х Era
Yasen	Modern	1988	SP1	12.9277	12.9617	12.9637	12.951	0.0367219	0.0122406	13.4505	(5517-А-5-5-1-Р3) х Roussalka
Zagore	Modern	1983	SP1	15.337	15.5343	15.8973	15.5896	0.27347	0.0911566	12.8534	na
Zlatina	Modern	2005	SP1	10.8247	8.83867	13.494	11.0524	2.05976	0.686586	12.4591	na
Zlatitsa	Modern	2003	SP1	12.1543	8.263	14.022	11.4798	2.54645	0.848816	12.9677	Yuna (Russia) x Flamura 85 (Romania)
Zlatiya	Modern	after 2000	SP1	13.2847	14.3113	7.05867	11.5516	4.27779	1.42593	13.5547	na
Zora	Modern	1997	SP1	12.3083	13.1387	13.2523	12.8998	0.448658	0.149553	13.1289	(2558-128 х 5460-965) х 6350-44 (incl. No234, Erythrospermum 34, Roussalka)
Beliya	Old		SP2	11.2687	7.65533	13.2623	10.7288	2.46164	0.820545	12.6506	selection from a local wheat
Bulgarische weizen-44	Old		SP2	13.0853	13.2733	13.2467	13.2018	0.200273	0.0667578	13.15
Dimitrovka 5-11	Old		SP2	12.3007	5.99633	15.5137	11.2702	4.65173	1.55058	13.0856
Druzhba	Modern	1976	SP2	12.0767	9.475	13.0777	11.5431	1.61479	0.538265	13.0156	na
Dunavka	Old		SP2	12.1487	12.7167	12.0803	12.3152	0.379682	0.126561	12.8796
Duskot-171	Old (landrace)		SP2	13.5413	13.551	12.1927	13.095	0.677629	0.225876	13.4119
Ferrugineum-113	Old		SP2	12.536	12.734	15.3827	13.5509	1.38114	0.46038	13.0858
Ivancha	Old (landrace)		SP2	12.9883	13.4577	12.7357	13.0606	0.324716	0.108239	13.1753
Karnobat-92	Old		SP2	11.3697	13.6953	10.9487	12.0046	1.28196	0.427321	12.6513
Karnobatska ranozrejka	Old		SP2	13.7427	13.6493	14.9133	14.1018	0.610326	0.203442	13.6098	Glorieti x No 159
Knezha	Old		SP2	12.3293	12.5857	12.3803	12.4318	0.145412	0.0484707	13.0332
Kozlovets	Old (landrace)		SP2	12.0877	10.317	13.756	12.0536	1.48981	0.496605	13.062
Maritsa	Old		SP2	11.4607	14.4513	11.054	12.322	1.60751	0.535836	12.878
Merkur	Old		SP2	13.431	13.712	13.3687	13.5039	0.208269	0.0694231	13.5243
Nadezhda-2	Old		SP2	11.945	12.5437	11.8143	12.101	0.33771	0.11257	13.0294	wheat-Agropyron hybrid-186 х Окерман
Nedan	Old (landrace)		SP2	12.2057	12.2777	12.857	12.4468	0.332182	0.110727	12.8955
No100-10	Old		SP2	10.9497	7.41767	13.3683	10.5786	2.59204	0.864014	12.6507
No1153	Old		SP2	14.6187	13.1973	16.3607	14.7256	1.37515	0.458383	13.7899
No127	Old		SP2	15.4357	16.5567	15.276	15.7561	0.615096	0.205032	14.2031
No14 (Obr chiflik)	Old		SP2	13.4993	13.4273	13.9613	13.6293	0.253835	0.0846117	12.6848
No1438	Old		SP2	14.9207	13.3113	16.2867	14.8396	1.29225	0.430751	13.9138
No159-early (Obr chiflik)	Old		SP2	16.766	16.817	16.7827	16.7886	0.119094	0.0486199	14.6537	Local wheat x Noe
No16 (Obr chiflik)	Old		SP2	12.0747	14.2633	12.3023	12.8801	1.04736	0.349122	13.3083
No165	Old		SP2	14.8923	16.101	14.9113	15.3016	0.611666	0.203889	13.9231
No182	Old		SP2	13.796	13.946	15.0443	14.2621	0.597669	0.199223	13.7039
No2315	Old		SP2	10.6683	7.68	12.3977	10.2487	2.06717	0.689055	12.4855
No264	Old		SP2	15.4317	15.369	15.751	15.5172	0.206058	0.068686	14.1818
No301	Old		SP2	12.4563	14.1473	12.882	13.1619	0.769985	0.256662	13.1918
No312	Old		SP2	14.3697	14.5733	14.7613	14.5681	0.177072	0.0590239	13.722
No7 (Obr chiflik)	Old		SP2	10.9723	7.83	11.4363	10.0796	1.69928	0.566425	13.8902
No84 (Obr chiflik)	Old		SP2	13.7087	15.483	13.817	14.3362	0.865031	0.288344	14.2118
Okerman-17	Old		SP2	12.713	12.278	14.729	13.24	1.13459	0.378198	13.2979	Noe x No 16
Okerman-804	Old		SP2	13.7863	14.9643	14.3533	14.368	0.580581	0.193527	13.691	(Noe x No 16 ) x Mentana
Polyak	Old		SP2	10.9573	10.302	13.0817	11.447	1.26829	0.422763	12.4573
Popovo	Old (landrace)		SP2	12.0383	15.274	11.987	13.0998	1.63271	0.544236	12.8711
Primorets	Modern	na	SP2	12.694	10.724	12.8953	12.1044	1.04153	0.347175	13.2537	na
Rada	Modern	2012	SP2	13.2183	13.585	12.907	13.2368	0.3005	0.100167	13.24	na
Sadovo super	Modern	1976	SP2	13.3047	13.8263	13.0513	13.3941	0.362712	0.120904	13.5009	Moisson x (Yubilejna-3 x wheat-Agropyron hybrid 186)
Sadovska ranozrejka-4	Old		SP2	12.7263	11.3163	14.9303	12.991	1.57803	0.526011	13.3085
Slomer	Old (landrace)		SP2	14.459	14.856	14.6203	14.6451	0.176949	0.0589829	13.6846
Sofia-312	Old		SP2	14.5503	11.413	16.7773	14.2469	2.33533	0.778444	13.8827
Sofia-40	Old		SP2	11.398	10.6173	13.4843	11.8332	1.2857	0.428566	12.6849
Stalinka	Old		SP2	15.179	15.747	14.2993	15.0751	0.635971	0.21199	14.0724
Stozher	Modern	after 2000	SP2	11.8807	11.1287	13.3057	12.105	0.958629	0.319543	13.0612	Kardam х (NS-171-2 x Kavkaz) х Kavkaz
Tencha	Old (landrace)		SP2	14.476	15.404	14.3353	14.7384	0.504271	0.16809	13.6436
Trapezitsa	Modern	1974	SP2	14.5673	14.5767	16.4	15.1813	0.921385	0.307128	13.9111	na
Vitosha	Old		SP2	14.0773	15.218	13.072	14.1224	0.933605	0.311202	13.6865
Yubilejna-2	Old		SP2	16.5187	16.7523	15.0407	16.1039	0.805608	0.268536	14.4285	(Noe x Nо 16) x Mentana
Bononiya	Modern	1988	SP3	11.3183	11.6373	13.7257	12.2271	1.14109	0.380363	12.9832	Krasnodarskij karlik x Ludogorka
Bozhana	Modern	2010	SP3	13.965	13.338	17.2697	14.8576	1.83275	0.610915	13.6433	Obrij (=Red River 68) х Odesskaya 51
Gizda	Modern	after 2000	SP3	11.1647	8.01067	14.1757	11.117	2.67388	0.891293	12.8469	Pobeda + Sodium azide 1mM
Guinness	Modern	2005	SP3	13.4007	13.0853	14.063	13.5163	0.451581	0.150527	13.6803	Katya + gamma irradiation 50 Gy
Hebros	Modern	1974	SP3	12.9217	13.1253	13.0907	13.0459	0.11683	0.0389435	13.3815	Fortunato x No 301
Kremena	Modern	1975	SP3	13.049	12.3233	14.119	13.1638	0.783162	0.261054	13.442	(Erythrospermum 894 x Campоdoro) х Bez-1
Levent	Modern	1973	SP3	15.3443	15.6733	15.0273	15.3483	0.283886	0.0946285	14.1422	Bez-1 х Fiorello
Ludogorka	Modern	1973	SP3	16.4103	16.5757	14.2023	15.7294	1.15113	0.383712	14.5323	Bez-1 х Etoile de Choisy
Milena	Modern	1996	SP3	16.433	14.968	17.4553	16.2854	1.08317	0.361058	14.5297	((203-238 х Vedrina) х 593-51) х ((Olsen dwarf x Odesskaya 16) х (Yuzhnaya Zarya х 780-66) х Odesskaya 86)
Momchil	Modern	1982	SP3	14.4817	14.8543	16.2603	15.1988	0.82346	0.274487	13.97	NS-11-36 х Avrora
Nova Sadovka	Old		SP3	12.5037	12.54	15.046	13.3632	1.26354	0.42118	13.1819
Prostor	Modern	1988	SP3	13.543	13.7333	13.84	13.7054	0.146364	0.0487881	13.5386	(Roussalka х Rannya 12) х Nadadores (Mexico)
Trayana	Modern	1981	SP3	14.2973	14.3337	15.1637	14.5982	0.469021	0.15634	13.8063	(Ogosta х Kapli Supressia) х Avrora
Yubilejna-3	Old		SP3	15.149	15.2457	15.0803	15.1583	0.103829	0.0346097	14.0582	Окерман x Mentana
Yunak	Modern	2003	SP3	13.9863	14.1057	14.214	14.102	0.125813	0.0419378	13.3686	Momchil x Katya
Zlatoklas	Modern	1975	SP3	12.6447	9.62533	13.9507	12.0736	1.92501	0.641671	13.3461	(Erythrospermum 19-16 x Bez-1) х Bez-1) х NS-171-2
Evmolpiya	Modern	na	AD	14.9947	10.3663	19.367	14.9093	3.90222	1.30074	14.1894	na
Kiten	Modern	1976	AD	13.7993	13.5453	14.3243	13.8897	0.347861	0.115954	13.7304	(Libellula x Bez-1) x (NS-171-2 x Erythrospermum 19-45)
KM-135	Modern	2010	AD	12.6503	12.601	13.9537	13.0683	0.669745	0.223248	13.3616	Proteika х Zagorka
Pavlinka	Modern	after 2000	AD	13.625	13.7257	13.7067	13.6858	0.0729277	0.0243092	13.6424	na
Sadovo-552	Modern	1995	AD	12.0387	13.127	11.8063	12.324	0.62035	0.206783	13.0847	Mironovskaya-15 х Н-10
Average:				13.2093	12.944	14.1566	13.4366	0.983067	0.327739	13.437
Std. Dev.				1.46452	2.05845	1.61857	1.34268			0.511773
Min				7.64367	5.99633	7.05867	9.41389			11.5709
Max				16.766	16.817	19.367	16.7886			14.6537
CV (%)				11.0871	15.9027	11.4333	9.99266			3.80869

## Sheet: Table-S2-TKW
Table S2. Information about the 179 wheat accessions from Bulgaria and summary statistics for thousand kernel weight (TKW) from three crop seasons (harvests 2014, 2017, 2021), average over the seasons, and the average best linear unbiased estimator (BLUE) values
aMembership of the accessions to a sub-population is as determined in [32].
Accession name	Accession status	Release year of modern varieties	Subpopulation (SP)a	TKW (g) 2014	TKW (g) 2017	TKW (g) 2021	TKW (g) average	Std. Dev.	St. Err.	TKW (g) BLUEs	Known pedigree
Aglika	Modern	1997	SP1	37.1172	41.9866	50.6656	43.2564	6.69557	1.22244	42.2811	2558-128 (incl. Bez-1) х Pliska
Aheloj	Modern	1987	SP1	43.0254	38.3725	43.5298	41.6426	3.69352	0.674341	45.3056	na
Albena	Modern	1996	SP1	52.2687	48.6911	53.4994	51.4864	4.61017	0.841698	46.9798	selection from F-1959-W 1-2 (Romania)
Altimir-67	Modern	1979	SP1	42.5283	42.1388	49.0266	44.5646	4.74916	0.867075	46.0176	Skorospelka 35 x Mexipak
Anna	Modern	2005	SP1	31.1445	39.1223	45.197	38.4879	7.53696	1.37605	45.0419	Lepoklasa x Pryaspa
Antonovka	Modern	2004	SP1	50.593	49.0891	55.982	51.888	4.68021	0.854485	48.9797	na
Asenovka	Modern	1987	SP1	52.5414	49.7362	58.8893	53.7223	4.84032	0.883718	50.9967	na
Avangard	Modern	after 2000	SP1	41.7639	34.4998	42.7049	39.6562	4.96674	0.906798	44.8065	Pobeda + Sodium azide 1 mM
Bolyarka	Modern	2004	SP1	47.5899	51.8195	60.5688	53.3261	7.83449	1.43037	47.258	Pryaspa x F 2076 W2-11 (Romania)
Boryana	Modern	1999	SP1	48.039	47.0561	50.6558	48.5837	5.10005	0.931137	48.8087	(9855-18/NS-314 x Avrora) х Momchil
Burgas-1	Old		SP1	44.1907	49.3855	52.974	48.8501	5.5317	1.00995	47.443	? x Neuzucht
Charodejka	Modern	1979	SP1	44.4015	40.605	47.2224	44.0763	6.14664	1.12222	43.862	Roussalka (improved) х Zlatna dolina
Demetra	Modern	2004	SP1	43.3583	34.6077	39.3411	39.1024	7.04984	1.28712	43.8109	2182-51 х 1613/86-1
Diamant	Modern	1996	SP1	48.3437	42.1416	52.6666	47.7173	9.05075	1.65243	48.2205	Yubilej x Sadovo-1
Dobrotitsa	Modern	1992	SP1	44.4535	43.3722	53.9003	47.242	6.00162	1.09574	43.1732	2558-128 (incl. Bez-1) х 4199 х 5460-1039
Dobrudzhanka	Old		SP1	30.0384	31.647	39.3422	33.6759	6.26877	1.14452	43.9748
Dona	Modern	2007	SP1	48.0108	40.7442	50.192	46.3157	5.59812	1.02207	46.8891	na
Dragana	Modern	2009	SP1	50.2275	50.0289	54.3977	51.5514	4.18908	0.764817	46.2902	Miryana (=Sredets-68 x Trakya)+gamma rays x Nadya (Russia)
Elitsa	Modern	1997	SP1	37.5316	46.9224	46.6448	43.6996	7.61274	1.38989	44.4671	Yuzhnaya Zarya x Pliska
Enola	Modern	1997	SP1	37.397	38.673	52.783	42.951	8.73249	1.59433	43.5847	(Kiten х 4360-5) х Trakiya) х Hersonskaya-552
Erythrospermum 19-16	Old		SP1	39.4347	31.0243	41.9279	37.4623	7.25112	1.32387	44.4176
Fermer	Modern	2009	SP1	49.8818	42.557	51.3192	47.9193	6.11073	1.11566	48.3298	Pobeda + gamma irradiation 50 Gy
Ferrugineum-2	Old		SP1	45.3901	37.5817	44.1416	42.3712	5.91454	1.07984	42.3954	San Pastore x S-134
Galateya	Modern	1999	SP1	41.2174	42.3053	54.9764	46.1663	8.55374	1.56169	42.3319	Pliska х 2367-8 (incl. Bez-1, Libellula)
Gladiator-113	Modern	1992	SP1	32.8584	39.7391	40.117	37.5715	6.61988	1.20862	42.5917	(Skorospelka 35 х Mexipak) х Siete Cerros
Goritsa	Modern	2010	SP1	42.9241	32.1923	43.5523	39.5562	6.21234	1.13421	45.4253	na
Hrabrets	Modern	na	SP1	53.3261	47.4287	56.3133	52.356	5.46397	0.99758	46.7525	Rekord x Slavyanka
Ideal	Modern	1999	SP1	44.3719	38.7473	46.8291	43.3161	5.4153	0.988695	41.5395	М-51-112 (incl. Bez-1) х М-524 (incl. Sadovo-1)
Iveta	Modern	2000	SP1	46.0402	39.5535	52.892	46.1619	6.76989	1.23601	43.47	Obrij x Mironovskaya 61
Joana	Modern	after 2000	SP1	54.3766	46.2111	50.5278	50.3719	7.87241	1.4373	48.085	Pobeda + gamma irradiation 50 Gy
Kaliakra-2	Modern	1968	SP1	40.6032	37.5331	48.7837	42.3067	7.08845	1.29417	46.1797	(Ibo-1828 x La Pervision) x Bez-1 х Skorospelka-12
Kalina	Modern	2010	SP1	53.0657	43.3391	61.6212	52.6753	8.55847	1.56256	45.3351	Prostor x Enola x Prostor
Kaloyan	Modern	1981	SP1	39.7994	40.8614	38.9751	39.8787	9.26032	1.69069	45.9662	(Cnem х Avrora) х Roussalka
Karat	Modern	1999	SP1	44.5916	40.4211	47.389	44.1339	5.66027	1.03342	44.0959	2811-2 (incl. Bez-1, Zlatna dolina, Sava) х 371-2023
Kardam	Modern	1980	SP1	41.1413	43.9125	48.1959	44.4166	5.72064	1.04444	44.679	(19-16-14 х NS-171-2) х Avrora
Karina	Modern	2004	SP1	40.5841	39.536	48.3311	42.8171	5.93035	1.08273	40.5933	Antilema 1-8 x Pliska
Katya	Modern	1982	SP1	44.7825	37.9135	47.1421	43.2794	6.16869	1.12624	45.2925	Hebros x Bez-1
Kiara	Modern	2010	SP1	43.9799	47.471	55.2898	48.9136	6.63902	1.21211	44.9096	Klassic x Enola
Korona	Modern	2006	SP1	38.2493	39.0752	44.976	40.7668	4.02448	0.734766	44.49	(Pryaspa х Ol'viya) х (Manital х Flamura 80 )
Krapets	Modern	1982	SP1	42.7445	44.4969	50.2328	45.8248	4.78337	0.87332	46.0813	S-233 х (S-134 х San Pastore) x Bez-1 х Bez-1x NS-171-2
Krasen	Modern	1977	SP1	36.6926	45.2525	46.0793	42.6748	7.06469	1.28983	44.6572	na
Kristal	Modern	1996	SP1	42.8183	41.8104	50.8743	45.1677	5.17265	0.944392	48.7675	(F9-75 x (Langedog x 19-16 x Avrora) х 7523-11
Kristi	Modern	2005	SP1	40.862	47.5282	46.1996	44.8633	6.57475	1.20038	45.7953	Miryana (=Sredets-68 x Trakya)+gamma rays x Pryaspa x Enola
Kristora	Modern	after 2000	SP1	38.3334	36.071	42.4119	38.9388	6.32398	1.1546	43.1224	Kristal х Todora
Lada	Modern	1981	SP1	41.5019	40.7468	49.0764	43.775	5.15296	0.940798	43.6859	(Etoile de Choisy x Bez-4) x Mexipak
Laska	Modern	1997	SP1	49.5332	45.417	54.9981	49.9828	6.4597	1.17937	46.7824	F-2498-W1-2 (Romania) х Obrij
Lazarka	Modern	2007	SP1	47.5197	42.8607	52.3645	47.5816	4.97949	0.909127	46.3512	Yuna x Flamura 85
Lider	Modern	2010	SP1	43.0266	44.0736	54.1032	47.0678	6.47247	1.18171	48.6533	Roussalka x Ae. variabilis x Trayana
Liliya	Modern	2000	SP1	35.6275	43.5815	45.69	41.633	5.86274	1.07038	45.039	Pryaspa х Mironovskaya 27
Lozen-6	Modern	2003	SP1	39.0766	38.2649	43.7548	40.3654	6.42121	1.17235	43.4791	(T. dicoccum x Ae. crassa) x Avrora
Ludogorie	Modern	2000	SP1	34.9116	37.8479	42.8678	38.5424	7.23013	1.32004	42.5857	(SO 290/756 х 4888-682) х Pliska) х 4067-622
Lyusil	Modern	2005	SP1	43.4849	46.5283	55.195	48.4027	6.91126	1.26182	47.2915	selection in line КС 750 (=Yantar х Medven)
Medeya	Modern	1999	SP1	40.7173	44.0147	49.3926	44.7082	5.97773	1.09138	47.8253	Polukarlik-3 х Yantar
Merilin	Modern	2007	SP1	48.3471	41.705	48.9569	46.3363	5.77625	1.05459	46.574	Lutescens 598 х kG2852-21 х SIWWSN-T-118-12
Miziya	Modern	2000	SP1	41.0351	43.8407	52.308	45.7279	6.67089	1.21793	44.4649	Vratsa х 271-63 (Shipka)
Murgavets	Modern	1994	SP1	37.4085	49.6075	53.3623	46.7928	9.18313	1.6766	45.3634	Altimir-67 (=Skorospelka-35 x Mexipac) х Sadovo-1
Mustang	Modern	1997	SP1	54.2218	51.3204	56.2425	53.9282	4.28213	0.781806	51.7687	Sadovo-1 х S 1503-142 (line from Zimbabwe) х Sadovo Super х Clement
Neda	Modern	2004	SP1	40.6309	50.1593	56.8206	49.2036	8.66935	1.5828	48.0547	GP 2558-128 (incl. Bez-1) х 3746-2 (=Sadovo-1 х Roason)
Niki	Modern	after 2000	SP1	35.0729	45.0148	52.1158	44.0678	8.24585	1.50548	48.0768	na
Nikolaj	Modern	after 2000	SP1	37.8817	40.9471	43.658	40.829	4.25634	0.777098	43.4755	Bul 5052- Ph x VІІІ F5 kr.19-а2-10
Nivyana	Modern	1999	SP1	52.8744	49.9273	54.837	52.5462	6.97123	1.27277	48.682	Yantar x Obrij
Nova Zvezda	Modern	after 2000	SP1	43.0186	46.0779	51.1901	46.7622	6.59976	1.20495	48.1804	90-Zong 150 x КС60
Ogosta	Modern	1978	SP1	45.5757	43.7363	50.8442	46.7188	6.41011	1.17032	47.6523	(N 234 х S-13) x Bez-1
Panaceya	Modern	after 2000	SP1	48.6854	40.9599	51.9824	47.2093	6.38595	1.16591	48.3887	Pobeda + Sodium azide 1 mM
Petya	Modern	2003	SP1	36.2099	39.699	50.0118	41.9736	7.86979	1.43682	42.3603	Thesse x 10/108 Karmen
Plamuk	Old		SP1	43.0112	43.275	50.075	45.4537	5.59575	1.02164	45.71
Pliska	Modern	1981	SP1	37.7268	35.1203	43.8093	38.8854	5.04372	0.920853	39.5477	(5517-А-5-5-1-Р3) х Roussalka
Pobeda	Modern	1984	SP1	47.5169	43.174	51.9926	47.5612	5.77196	1.05381	47.572	T. sphaerococcum x Rotund. x (T. durum x Secale montanum) x Bez-1 х Mexican 225
Polena	Modern	after 2000	SP1	37.1556	41.5434	41.6235	40.1075	5.97389	1.09068	45.2246	Kristal х Spartanka
Predela	Modern	na	SP1	54.1789	47.0442	58.3988	53.2073	6.22369	1.13628	51.7857	na
Prelom	Modern	1996	SP1	53.2075	49.4046	57.4178	53.3433	6.47888	1.18288	46.8964	Rositsa х Tundzha
Preslav	Modern	1996	SP1	42.9803	39.9807	49.7169	44.2259	4.77621	0.872013	45.4932	Armada x 9987-29 (incl. Slavyanka)
Progres	Modern	2000	SP1	44.2465	58.1819	55.2859	52.5714	10.1933	1.86104	44.9066	15-92 х 1027-1
Pryaspa	Modern	1989	SP1	46.8604	45.3326	53.3646	48.5192	4.85161	0.885779	48.1665	Avrora х Era (selection)
Puldin	Modern	na	SP1	45.7782	45.8184	46.0922	45.8963	4.59638	0.839181	48.1998
Rekord	Modern	1973	SP1	40.4835	38.0721	40.2104	39.5887	4.49835	0.850107	44.886	Yantar х Medven
Roussalka	Modern	1971	SP1	45.222	45.6262	51.1536	47.3339	6.96907	1.27237	41.9012	S-13 x BAN-54
Sadovo-1	Modern	1974	SP1	49.7512	46.2445	48.897	48.2976	6.36773	1.16258	48.915	Yubilejna-3 х Bez-1
Sadovo-772	Modern	1996	SP1	41.318	42.3337	44.6639	42.7719	4.64058	0.847251	46.7103	Skitiya х Sadovo-1
Skitiya	Modern	1980	SP1	41.5641	38.2552	44.7669	41.5287	4.694	0.857004	40.4588	Sonora-64 х Kavkaz х Zlatna dolina
Slavejno	Modern	after 2000	SP1	42.694	42.6215	59.3098	48.2084	9.83473	1.79557	47.0009	Prelom x Gabrier
Slaven	Modern	after 2000	SP1	39.8606	44.0018	52.81	45.5575	6.50582	1.1878	47.9503	Garant x Bononiya
Slaveya	Modern	2000	SP1	39.5597	45.178	51.6932	45.4769	5.91506	1.07994	42.2221	Pliska х 2558-128 х Pliska
Slavyani	Old		SP1	46.5223	44.4369	45.3459	45.435	7.25837	1.32519	46.2068
Slavyanka	Modern	1975	SP1	42.2207	42.8857	51.3159	45.4741	5.33292	0.973653	46.3668	NS-313 x Bez-1
Sredets-68	Modern	1968	SP1	26.2142	41.8595	49.337	39.1369	10.6216	1.93922	41.9811	Skorospelka 35 х Mexipac
Stolets	Modern	na	SP1	41.2133	41.1739	47.6966	43.3613	5.81625	1.0619	43.8935	na
Stoyana	Modern	2010	SP1	40.5404	44.0759	44.3546	42.9903	4.82911	0.881671	42.4036	2477-2 (=NS 175/2/Libelula/Bez-1) х Slaveya
Strelets	Modern	after 2000	SP1	51.9197	48.2405	58.7325	52.9642	6.56425	1.19846	47.4656	Prelom x Super fatua
Svilena	Modern	1994	SP1	39.9137	44.3987	44.4691	42.9271	4.29346	0.783875	45.447	(863-А-31 х Super Zlatna) х 76-24-5
Tangra	Modern	1978	SP1	44.1434	43.6804	46.3855	44.7364	6.29393	1.14911	46.9172	na
Todora	Modern	1996	SP1	36.4343	41.6024	44.5205	40.8524	4.69913	0.857941	43.9523	1011-57 х Trayana
Toshevka	Modern	1978	SP1	46.4813	47.2207	48.3318	47.3446	4.35723	0.795518	46.6234	NS-314 x Bez-1
Trakiya	Modern	1977	SP1	43.5509	49.7856	52.1128	48.4831	4.65377	0.849658	44.4556	(Bez-1 х Elia) х Roussalka
Tsarevets	Modern	2008	SP1	35.9439	42.2195	43.8832	40.6822	6.34272	1.15802	42.9489	Zebrets x Katya
Tundzha	Modern	na	SP1	41.9995	46.4217	47.1471	45.1894	6.27294	1.14528	45.4288	na
Vega	Modern	1976	SP1	39.277	41.358	46.2018	42.2789	4.37169	0.798157	44.2503	(No 301 х S-13) х Rannaya-12 х NS-314
Velizara	Modern	2000	SP1	41.7764	43.0788	54.4196	46.425	7.00321	1.27861	45.9551	Yantar х Przhevalskaya
Vezhen	Modern	na	SP1	39.2021	38.4537	46.4929	41.3829	5.45887	0.996649	42.6452	na
Vikhar	Modern	after 2000	SP1	47.7981	47.4888	51.1518	48.8129	5.44078	0.993346	48.911	Yunak x Flamura 80
Vselena	Modern	after 2000	SP1	53.7569	51.3893	57.2631	54.1364	4.36228	0.79644	51.8	Momchil + Sodium azide 1 mM
Yana	Modern	1991	SP1	26.9371	37.2466	42.3349	35.5062	7.4259	1.35578	41.2679	na
Yanitsa	Modern	2009	SP1	40.9117	48.9603	52.0291	47.3004	5.72781	1.04575	47.5733	na
Yantar	Modern	1982	SP1	40.4397	42.9396	52.0534	45.1442	6.52243	1.19083	47.4047	Avrora х Era
Yasen	Modern	1988	SP1	39.6744	40.3935	45.4842	41.8507	3.75998	0.686476	42.5905	(5517-А-5-5-1-Р3) х Roussalka
Zagore	Modern	1983	SP1	44.5942	44.4103	50.3095	46.438	4.57272	0.834861	44.8012	na
Zlatina	Modern	2005	SP1	41.4836	47.3787	49.7413	46.2012	5.415	0.988639	44.9187	na
Zlatitsa	Modern	2003	SP1	49.6881	41.6614	50.5449	47.2982	5.6155	1.02524	47.8078	Yuna (Russia) x Flamura 85 (Romania)
Zlatiya	Modern	after 2000	SP1	46.1838	49.41	52.1392	49.2443	4.86452	0.888135	46.8925	na
Zora	Modern	1997	SP1	40.3707	50.0491	54.0973	48.1723	6.38711	1.16612	43.7763	(2558-128 х 5460-965) х 6350-44 (incl. No234, Erythrospermum 34, Roussalka)
Beliya	Old		SP2	31.13	47.3375	49.8796	42.7824	10.5457	1.92538	42.156	selection from a local wheat
Bulgarische weizen-44	Old		SP2	47.3259	44.6971	41.7877	44.6036	5.66249	1.03382	44.9475
Dimitrovka 5-11	Old		SP2	22.1715	39.3925	41.0562	34.2068	9.94542	1.81578	40.3136
Druzhba	Modern	1976	SP2	34.0804	47.2656	53.2368	44.8609	8.80465	1.6075	42.0282	na
Dunavka	Old		SP2	46.1952	47.4605	38.5507	44.0688	5.60251	1.02287	45.6945
Duskot-171	Old (landrace)		SP2	45.0213	44.6155	43.4209	44.3526	4.26854	0.779325	44.7258
Ferrugineum-113	Old		SP2	58.3594	50.728	35.5906	48.226	11.2264	2.04965	46.166
Ivancha	Old (landrace)		SP2	50.4697	43.9147	46.7466	47.0437	4.97204	0.907767	46.4211
Karnobat-92	Old		SP2	47.9864	47.5604	45.8044	47.1171	5.17616	0.945032	45.6103
Karnobatska ranozrejka	Old		SP2	49.0395	49.0138	51.3513	49.8015	6.96678	1.2937	46.2792	Glorieti x No 159
Knezha	Old		SP2	45.5228	47.3238	47.1823	46.6763	4.22364	0.771128	45.1134
Kozlovets	Old (landrace)		SP2	40.0068	47.5968	37.9615	41.855	9.42431	1.75005	45.1511
Maritsa	Old		SP2	26.772	48.3619	46.5615	40.5651	11.3251	2.06768	44.3721
Merkur	Old		SP2	27.8982	41.2725	41.5399	36.9035	8.74795	1.59715	42.2004
Nadezhda-2	Old		SP2	49.052	52.4481	52.1283	51.2095	6.9105	1.26168	46.9098	wheat-Agropyron hybrid-186 х Окерман
Nedan	Old (landrace)		SP2	36.4493	43.1638	45.6851	41.7661	7.60519	1.38851	45.0978
No100-10	Old		SP2	41.9467	47.8924	51.3476	47.0622	5.64876	1.03132	45.7525
No1153	Old		SP2	50.0747	48.3195	48.205	48.8664	4.17398	0.762061	45.8811
No127	Old		SP2	50.6511	53.0628	49.211	50.975	5.57892	1.01857	45.5603
No14 (Obr chiflik)	Old		SP2	44.78	40.2935	38.6204	41.2313	6.43479	1.17483	45.7337
No1438	Old		SP2	41.9727	47.8434	51.3069	47.041	6.82568	1.24619	45.881
No159-early (Obr chiflik)	Old		SP2	42.5066	37.7633	36.1142	38.7947	8.09664	1.47824	44.3869	Local wheat x Noe
No16 (Obr chiflik)	Old		SP2	43.676	44.4918	45.4527	44.5402	4.30377	0.785757	45.4275
No165	Old		SP2	40.4687	40.3055	38.9363	39.9035	3.14667	0.574501	43.9867
No182	Old		SP2	65.8142	48.8708	50.292	54.9923	6.41525	1.17126	47.3427
No2315	Old		SP2	46.203	45.6504	48.9068	46.9201	4.07317	0.743656	45.0577
No264	Old		SP2	42.2937	48.0745	48.7793	46.3825	5.06861	0.925397	46.5142
No301	Old		SP2	46.3531	56.4312	58.7429	53.8424	6.88421	1.25688	46.9703
No312	Old		SP2	46.3576	49.5255	51.2848	49.056	3.68963	0.673631	45.1247
No7 (Obr chiflik)	Old		SP2	40.7543	41.5089	43.0446	41.7693	4.24237	0.774547	49.9423
No84 (Obr chiflik)	Old		SP2	39.4911	47.2745	44.1429	43.6361	8.18524	1.49441	44.9016
Okerman-17	Old		SP2	37.9331	50.2428	59.4492	49.2083	10.314	1.88306	44.1491	Noe x No 16
Okerman-804	Old		SP2	38.1198	41.2401	55.2314	44.8638	7.51379	1.37182	42.5865	(Noe x No 16 ) x Mentana
Polyak	Old		SP2	42.4362	39.9668	42.2802	41.561	7.35597	1.34301	44.936
Popovo	Old (landrace)		SP2	42.1106	41.1375	43.9009	42.383	5.81539	1.06174	45.1901
Primorets	Modern	na	SP2	45.0373	39.0203	24.4444	36.1674	5.17395	1.07884	44.3453	na
Rada	Modern	2012	SP2	47.4896	50.7705	54.699	50.9864	4.93917	0.901766	45.183	na
Sadovo super	Modern	1976	SP2	37.8792	36.5448	41.5447	38.6563	5.68062	1.03713	44.1987	Moisson x (Yubilejna-3 x wheat-Agropyron hybrid 186)
Sadovska ranozrejka-4	Old		SP2	25.9375	37.1438	52.0618	38.3811	11.6899	2.13428	41.4548
Slomer	Old (landrace)		SP2	46.2983	46.2875	46.482	46.3559	5.81568	1.06179	45.7141
Sofia-312	Old		SP2	46.0586	48.5992	49.3027	47.9868	5.02461	0.917364	45.4435
Sofia-40	Old		SP2	48.5235	45.0454	47.9048	47.1579	6.47577	1.18231	45.3334
Stalinka	Old		SP2	28.9844	46.5847	50.6039	42.0576	10.6013	1.93552	42.1813
Stozher	Modern	after 2000	SP2	43.7755	39.6815	49.3941	44.2837	7.81361	1.42656	43.5981	Kardam х (NS-171-2 x Kavkaz) х Kavkaz
Tencha	Old (landrace)		SP2	45.2958	42.0993	44.6743	44.0231	7.29434	1.33176	45.5829
Trapezitsa	Modern	1974	SP2	38.8451	40.294	48.5055	42.5482	5.82031	1.06264	44.6657	na
Vitosha	Old		SP2	26.5326	47.5342	49.0842	41.0503	11.1059	2.02764	41.6026
Yubilejna-2	Old		SP2	46.0426	46.5374	46.7857	46.4552	3.35626	0.612767	45.5626	(Noe x Nо 16) x Mentana
Bononiya	Modern	1988	SP3	45.1497	49.2794	52.7123	49.0471	7.1448	1.30446	49.1285	Krasnodarskij karlik x Ludogorka
Bozhana	Modern	2010	SP3	52.136	47.115	52.0057	50.4189	5.8855	1.07454	47.2433	Obrij (=Red River 68) х Odesskaya 51
Gizda	Modern	after 2000	SP3	38.8032	38.0302	42.5686	39.8006	3.80815	0.695269	44.7471	Pobeda + Sodium azide 1mM
Guinness	Modern	2005	SP3	44.3802	47.0544	54.2121	48.5489	6.63768	1.21187	49.6804	Katya + gamma irradiation 50 Gy
Hebros	Modern	1974	SP3	49.2364	37.7884	42.564	43.1962	8.2164	1.5001	45.1909	Fortunato x No 301
Kremena	Modern	1975	SP3	43.7188	41.7516	45.8215	43.764	3.99535	0.729448	46.0321	(Erythrospermum 894 x Campоdoro) х Bez-1
Levent	Modern	1973	SP3	53.3222	48.9519	48.5114	50.2618	6.47104	1.18145	47.4249	Bez-1 х Fiorello
Ludogorka	Modern	1973	SP3	44.378	47.0606	48.4699	46.6362	4.51878	0.825013	46.5575	Bez-1 х Etoile de Choisy
Milena	Modern	1996	SP3	47.273	44.5849	45.7178	45.8586	4.60442	0.840649	46.1802	((203-238 х Vedrina) х 593-51) х ((Olsen dwarf x Odesskaya 16) х (Yuzhnaya Zarya х 780-66) х Odesskaya 86)
Momchil	Modern	1982	SP3	45.7203	44.1857	49.188	46.3647	5.38464	0.983097	47.223	NS-11-36 х Avrora
Nova Sadovka	Old		SP3	53.6452	49.8572	51.2207	51.5744	3.2722	0.597419	45.2736
Prostor	Modern	1988	SP3	43.454	55.4807	50.5386	49.8245	8.81018	1.60851	44.7828	(Roussalka х Rannya 12) х Nadadores (Mexico)
Trayana	Modern	1981	SP3	40.0249	47.1424	50.173	45.7801	5.77446	1.05427	44.6331	(Ogosta х Kapli Supressia) х Avrora
Yubilejna-3	Old		SP3	40.2453	46.4953	44.0527	43.5978	7.15911	1.30707	44.2931	Окерман x Mentana
Yunak	Modern	2003	SP3	46.1519	46.8592	52.925	48.6454	5.51257	1.00645	42.3358	Momchil x Katya
Zlatoklas	Modern	1975	SP3	41.1374	37.4067	48.4924	42.3455	6.43067	1.17407	44.0324	(Erythrospermum 19-16 x Bez-1) х Bez-1) х NS-171-2
Evmolpiya	Modern	na	AD	42.59	45.0665	50.6867	46.1144	5.10209	0.93151	47.2062	na
Kiten	Modern	1976	AD	43.5918	37.9629	46.4918	42.6821	6.17636	1.12764	42.5016	(Libellula x Bez-1) x (NS-171-2 x Erythrospermum 19-45)
KM-135	Modern	2010	AD	42.2646	37.1711	46.3136	41.9164	5.27314	0.96274	47.3629	Proteika х Zagorka
Pavlinka	Modern	after 2000	AD	54.3219	42.2781	45.2833	47.2945	8.5959	1.56939	44.5812	na
Sadovo-552	Modern	1995	AD	42.5877	47.3464	46.5189	45.4844	5.52198	1.0627	45.5811	Mironovskaya-15 х Н-10
Average:				43.0925	44.0225	48.6141	45.243			45.4292
Std. Dev.				6.43111	4.72201	5.41636	4.28224			2.24642
Min				22.1715	31.0243	24.4444	33.6759			39.5477
Max				65.8142	58.1819	61.6212	54.9923			51.8
CV (%)				14.924	10.7264	11.1416	9.46497			4.94488

## Sheet: Table-S3-ANOVA
Table S3. Analysis of variance of the single factor “Growing season” of grain protein content (GPC) and thousand kernel weight (TKW) in a set of 179 bread wheat accessions in three growing seasons (harvests 2014, 2017, 2021)
Grain protein content (GPC)							Thousand kernel weight (TKW)
GPC: 2014-2017							TKW: 2014-2017
Source of Variation	SS	df	MS	F	P-value		Source of Variation	SS	df	MS	F	P-value
Between Groups	6.22063	1	6.22063	1.94973	0.163486		Between Groups	77.4004	1	77.4004	2.43181	0.119784
Within Groups	1135.82	356	3.19051				Within Groups	11330.9	356	31.8282
Total	1142.04	357					Total	11408.3	357
GPC: 2014-2021							TKW: 2014-2021
Source of Variation	SS	df	MS	F	P-value		Source of Variation	SS	df	MS	F	P-value
Between Groups	80.6005	1	80.6005	33.8401	1.33348e-08		Between Groups	2728.65	1	2728.65	77.1938	6.66342e-17
Within Groups	847.922	356	2.3818				Within Groups	12583.9	356	35.3481
Total	928.522	357					Total	15312.6	357
GPC: 2017-2021							TKW: 2017-2021
Source of Variation	SS	df	MS	F	P-value		Source of Variation	SS	df	MS	F	P-value
Between Groups	131.604	1	131.604	38.3856	1.60452e-09		Between Groups	1886.92	1	1886.92	73.088	3.71016e-16
Within Groups	1220.54	356	3.42849				Within Groups	9190.91	356	25.8172
Total	1352.15	357					Total	11077.8	357
* significant effects are marked in red (p<0.001)

## Sheet: Table-S4-deviations-GPC
Table S4. Variability and stability of grain protein content (GPC ) in a set of 179 bread wheat accessions.
Accession name	Subpopulation (SP)	GPC (%) 2014	GPC (%) 2017	GPC (%) 2021	GPC (%) average	Deviation from average-2014 (in %)	Deviation from average-2017 (in %)	Deviation from average-2021 (in %)	Average deviation	Variance
Petya	SP1	12.7433	12.5743	13.6497	12.9891	-0.0353268	-0.0282586	-0.0360405	-0.0332086	1.85042e-05
Roussalka	SP1	14.1493	13.9233	15.3063	14.4597	0.0711077	0.0759918	0.0809557	0.0760184	2.42463e-05
Erythrospermum 19-16	SP1	12.7647	12.5943	13.857	13.072	-0.0337118	-0.026713	-0.0213983	-0.0272744	3.81421e-05
Pliska	SP1	14.3943	14.1817	15.62	14.732	0.0896543	0.0959557	0.103107	0.0962391	4.53063e-05
Karnobatska ranozrejka	SP2	13.7427	13.6493	14.9133	14.1018	0.040323	0.0548171	0.0532015	0.0494472	6.3091e-05
Vikhar	SP1	14.3487	14.237	15.3653	14.6503	0.0861973	0.100232	0.0851224	0.0905172	7.10696e-05
Dobrotitsa	SP1	14.5293	14.4477	15.8363	14.9378	0.0998738	0.116512	0.118385	0.11159	0.000103835
Krapets	SP1	15.2037	15.0747	16.2033	15.4939	0.150921	0.164967	0.144303	0.153397	0.000111341
Predela	SP1	11.8467	11.8143	12.981	12.214	-0.103205	-0.0869912	-0.0832627	-0.0911529	0.000112409
Guinness	SP3	13.4007	13.0853	14.063	13.5163	0.0144335	0.0112313	-0.00685028	0.00627152	0.0001317
Kaloyan	SP1	13.203	12.8897	13.8057	13.2994	-0.000529902	-0.00388975	-0.0250235	-0.0098144	0.000176311
Boryana	SP1	12.5227	12.6103	13.507	12.88	-0.0520313	-0.0254766	-0.0461158	-0.0412079	0.000194354
KM-135	AD	12.6503	12.601	13.9537	13.0683	-0.0423669	-0.0261978	-0.0145716	-0.0277121	0.000194865
Lada	SP1	12.715	12.2667	13.224	12.7352	-0.0374716	-0.052035	-0.0661017	-0.0518694	0.000204941
No182	SP2	13.796	13.946	15.0443	14.2621	0.0443603	0.0777434	0.0624529	0.0615189	0.000279262
Diamant	SP1	13.6723	13.0223	14.7213	13.8053	0.0349987	0.0063627	0.0396422	0.0270012	0.000324851
Trayana	SP3	14.2973	14.3337	15.1637	14.5982	0.0823114	0.107702	0.0708804	0.0869647	0.000355201
Slaven	SP1	12.6883	12.5173	13.1827	12.7961	-0.0394903	-0.0326636	-0.0690207	-0.0470582	0.000373415
Kiten	AD	13.7993	13.5453	14.3243	13.8897	0.0446127	0.04678	0.0116055	0.0343327	0.00038857
Nedan	SP2	12.2057	12.2777	12.857	12.4468	-0.0760283	-0.051185	-0.0920198	-0.0730777	0.0004234
Rekord	SP1	16.0513	16.2887	17.406	16.582	0.21509	0.258784	0.229237	0.23437	0.000497065
Galateya	SP1	13.9477	14.0603	14.7347	14.2476	0.0558415	0.0865791	0.0405838	0.0610015	0.00054886
Kremena	SP3	13.049	12.3233	14.119	13.1638	-0.0121877	-0.0476558	-0.00289548	-0.020913	0.000557971
Karat	SP1	13.285	12.581	14.4227	13.4296	0.00567752	-0.0277434	0.0185499	-0.001172	0.000570955
Gladiator-113	SP1	12.4107	12.6273	13.1477	12.7286	-0.0605097	-0.0241628	-0.0714925	-0.052055	0.000613636
Preslav	SP1	13.6283	13.4103	14.0337	13.6908	0.0316679	0.0363472	-0.00892185	0.0196978	0.000619786
Mustang	SP1	15.7907	15.7277	16.4997	16.006	0.195357	0.21543	0.165231	0.192006	0.00063842
Kiara	SP1	13.133	12.992	14.7577	13.6276	-0.00582892	0.00401855	0.0422081	0.0134659	0.000643828
Kalina	SP1	13.184	13.29	14.8527	13.7756	-0.00196821	0.0270479	0.0489171	0.0246656	0.000651586
Pryaspa	SP1	13.3	12.409	14.161	13.29	0.00681302	-0.0410355	7.06215e-05	-0.011384	0.000670777
Hrabrets	SP1	13.5547	12.7087	14.556	13.6064	0.0260913	-0.0178774	0.0279661	0.01206	0.000673065
No14 (Obr chiflik)	SP2	13.4993	13.4273	13.9613	13.6293	0.0219026	0.037661	-0.0140301	0.0151778	0.00070191
Murgavets	SP1	12.6823	12.923	14.3503	13.3186	-0.0399445	-0.00131376	0.0134416	-0.00927221	0.000760022
Progres	SP1	12.7147	12.2307	14.1513	13.0322	-0.0374968	-0.0548171	-0.000612053	-0.0309753	0.000766444
Yana	SP1	14.757	14.4137	15.1147	14.7618	0.117108	0.113885	0.06742	0.0994709	0.000773047
Trapezitsa	SP2	14.5673	14.5767	16.4	15.1813	0.10275	0.126481	0.158192	0.129141	0.000773751
Slavejno	SP1	12.1373	11.9283	12.337	12.1342	-0.0812011	-0.0781813	-0.128743	-0.0960418	0.000804303
Fermer	SP1	14.3013	13.87	14.5407	14.2373	0.0826142	0.0718702	0.0268832	0.0604559	0.000874199
Trakiya	SP1	14.039	14.178	14.6737	14.2969	0.0627555	0.0956723	0.0362759	0.0649012	0.000885437
Momchil	SP3	14.4817	14.8543	16.2603	15.1988	0.0962655	0.147939	0.148329	0.130844	0.000896817
Iveta	SP1	12.928	12.7313	14.6813	13.4469	-0.0213475	-0.0161257	0.0368173	-0.000218616	0.00103556
Dona	SP1	13.6683	12.73	14.9077	13.7687	0.0346959	-0.0162287	0.0528013	0.0237562	0.00128105
Kristal	SP1	14.0143	12.8783	15.0157	13.9694	0.0608882	-0.00476558	0.0604284	0.0388504	0.00142682
Stoyana	SP1	11.7837	11.094	13.2373	12.0383	-0.107974	-0.142658	-0.0651601	-0.105264	0.00150701
Slavyanka	SP1	13.1633	13.5697	15.1867	13.9732	-0.00353268	0.0486605	0.0725047	0.0392108	0.00151239
Zagore	SP1	15.337	15.5343	15.8973	15.5896	0.161014	0.200489	0.122693	0.161399	0.00151318
No264	SP2	15.4317	15.369	15.751	15.5172	0.168181	0.187713	0.112359	0.156084	0.00152929
Miziya	SP1	14.1343	14.4323	14.687	14.4179	0.0699722	0.115327	0.0372175	0.0741723	0.00153851
Stozher	SP2	11.8807	11.1287	13.3057	12.105	-0.100631	-0.139979	-0.0603343	-0.100315	0.00158591
Strelets	SP1	13.9497	13.2543	15.671	14.2917	0.0559929	0.0242916	0.106709	0.0623312	0.00172829
No312	SP2	14.3697	14.5733	14.7613	14.5681	0.087787	0.126224	0.042467	0.0854926	0.00175774
Prostor	SP3	13.543	13.7333	13.84	13.7054	0.0252082	0.0613086	-0.0225989	0.021306	0.00177154
Yunak	SP3	13.9863	14.1057	14.214	14.102	0.0587686	0.0900824	0.00381356	0.0508882	0.00190716
Anna	SP1	11.7383	12.3763	12.3807	12.1651	-0.111406	-0.04356	-0.125659	-0.0935416	0.00192441
Yasen	SP1	12.9277	12.9617	12.9637	12.951	-0.0213727	0.00167439	-0.0844868	-0.0347284	0.00198972
Slaveya	SP1	13.224	13.192	13.226	13.214	0.0010598	0.0194745	-0.0659605	-0.0151421	0.00202166
Hebros	SP3	12.9217	13.1253	13.0907	13.0459	-0.0218269	0.0143225	-0.0755179	-0.0276741	0.00204347
Skitiya	SP1	12.899	13.0607	13.0263	12.9953	-0.0235428	0.00932509	-0.0800612	-0.0314263	0.00204409
Bulgarische weizen-44	SP2	13.0853	13.2733	13.2467	13.2018	-0.00943729	0.0257599	-0.0645009	-0.0160594	0.00206965
Goritsa	SP1	14.4497	14.497	14.6073	14.518	0.093843	0.120325	0.0315913	0.0819197	0.00207502
Elitsa	SP1	12.8803	12.8953	12.8423	12.8727	-0.0249558	-0.00345183	-0.0930556	-0.0404877	0.00218814
Kristora	SP1	12.7927	12.7983	12.7373	12.7761	-0.0315922	-0.010948	-0.100471	-0.0476703	0.00219746
Zora	SP1	12.3083	13.1387	13.2523	12.8998	-0.0682564	0.0153529	-0.0641008	-0.0390014	0.00222011
Pavlinka	AD	13.625	13.7257	13.7067	13.6858	0.0314156	0.0607161	-0.0320151	0.0200389	0.00224684
Milena	SP3	16.433	14.968	17.4553	16.2854	0.243982	0.156723	0.232721	0.211142	0.00225276
Aglika	SP1	13.099	13.4843	13.3953	13.3262	-0.00840273	0.0420659	-0.0540019	-0.00677955	0.00230923
Sadovo-772	SP1	12.9293	12.9903	12.886	12.9352	-0.0212465	0.00388975	-0.0899718	-0.0357762	0.00236083
Kardam	SP1	13.7237	13.7217	13.6973	13.7142	0.0388847	0.060407	-0.0326742	0.0222058	0.00237467
Ideal	SP1	14.1627	13.2717	15.903	14.4458	0.0721171	0.0256311	0.123093	0.0736138	0.0023764
Okerman-17	SP2	12.713	12.278	14.729	13.24	-0.037623	-0.0511592	0.0401836	-0.0161995	0.0024301
Knezha	SP2	12.3293	12.5857	12.3803	12.4318	-0.0666667	-0.0273828	-0.125683	-0.073244	0.00244816
Niki	SP1	14.0883	14.13	14.104	14.1074	0.06649	0.0919629	-0.0039548	0.0514994	0.00246859
Kaliakra-2	SP1	12.601	12.445	14.7913	13.2791	-0.0461014	-0.0382535	0.0445857	-0.0132564	0.00252468
Katya	SP1	14.417	13.723	16.4333	14.8578	0.0913702	0.06051	0.160546	0.104142	0.00262415
Sadovo-1	SP1	12.7017	12.639	12.435	12.5919	-0.0384809	-0.0232612	-0.121822	-0.0611881	0.00281527
Dragana	SP1	10.7617	11.688	12.8953	11.7817	-0.185339	-0.0967543	-0.0893126	-0.123802	0.00285397
Puldin	SP1	11.67	11.3373	13.792	12.2664	-0.116578	-0.123854	-0.0259887	-0.0888069	0.00297283
Laska	SP1	13.1367	13.097	15.5287	13.9208	-0.00555135	0.0121329	0.0966573	0.0344129	0.00298395
Lazarka	SP1	14.1837	14.6187	16.7583	15.1869	0.0737068	0.129727	0.183498	0.128977	0.00301396
Plamuk	SP1	12.0593	11.047	13.659	12.2551	-0.0871057	-0.146291	-0.0353814	-0.0895926	0.00307985
Neda	SP1	14.176	14.178	14.003	14.119	0.0731264	0.0956723	-0.0110876	0.0525704	0.00316633
Bononiya	SP3	11.3183	11.6373	13.7257	12.2271	-0.1432	-0.10067	-0.0306733	-0.0915142	0.00322841
Slomer	SP2	14.459	14.856	14.6203	14.6451	0.0945496	0.148068	0.0325094	0.091709	0.0033445
Merkur	SP2	13.431	13.712	13.3687	13.5039	0.0167298	0.05966	-0.0558851	0.00683487	0.0034111
Toshevka	SP1	14.3167	14.391	16.9367	15.2148	0.0837749	0.112133	0.196092	0.130667	0.00341142
Yubilejna-3	SP3	15.149	15.2457	15.0803	15.1583	0.146783	0.178181	0.0649953	0.129986	0.00341436
Tsarevets	SP1	12.7987	13.1653	12.7583	12.9074	-0.031138	0.0174137	-0.0989878	-0.0375707	0.00341836
Charodejka	SP1	11.3297	11.9325	11.398	11.5534	-0.142342	-0.0778619	-0.195056	-0.13842	0.00344518
No159-early (Obr chiflik)	SP2	16.766	16.817	16.7827	16.7886	0.26919	0.299614	0.185217	0.25134	0.00351064
Merilin	SP1	13.7747	13.564	16.2737	14.5374	0.0427454	0.0482226	0.14927	0.0800794	0.00359803
Polena	SP1	13.505	14.0713	13.686	13.7541	0.0223316	0.0874292	-0.0334746	0.0254287	0.00366162
Panaceya	SP1	14.2157	14.7933	14.463	14.4907	0.0761292	0.143225	0.0213983	0.0802509	0.00372319
Ogosta	SP1	14.9737	15.094	14.8317	14.9664	0.13351	0.166461	0.0474341	0.115802	0.00377702
Nova Sadovka	SP3	12.5037	12.54	15.046	13.3632	-0.0534696	-0.0309119	0.0625706	-0.00727029	0.00378553
Albena	SP1	11.3203	12.1677	13.8777	12.4552	-0.143048	-0.0596857	-0.0199388	-0.0742242	0.00394751
Dunavka	SP2	12.1487	12.7167	12.0803	12.3152	-0.0803432	-0.0172591	-0.146869	-0.0814905	0.00420067
No1438	SP2	14.9207	13.3113	16.2867	14.8396	0.129498	0.0286965	0.150188	0.102794	0.00422488
Enola	SP1	13.811	14.5617	14.0887	14.1538	0.0454958	0.125322	-0.00503766	0.0552601	0.00431992
Svilena	SP1	13.0723	11.305	13.9537	12.777	-0.0104214	-0.126352	-0.0145716	-0.0504485	0.00432536
Polyak	SP2	10.9573	10.302	13.0817	11.447	-0.170527	-0.203864	-0.0761535	-0.150182	0.00438796
Stolets	SP1	13.973	14.653	14.1553	14.2604	0.0577593	0.13238	-0.000329567	0.06327	0.00442575
Primorets	SP2	12.694	10.724	12.8953	12.1044	-0.0390613	-0.171252	-0.0893126	-0.0998753	0.00445227
Sofia-40	SP2	11.398	10.6173	13.4843	11.8332	-0.137169	-0.179495	-0.0477166	-0.12146	0.00452647
Nadezhda-2	SP2	11.945	12.5437	11.8143	12.101	-0.0957608	-0.0306285	-0.165654	-0.0973479	0.00455989
No1153	SP2	14.6187	13.1973	16.3607	14.7256	0.106636	0.0198867	0.155414	0.0939791	0.00471209
Rada	SP2	13.2183	13.585	12.907	13.2368	0.000630835	0.0498454	-0.0884887	-0.0126708	0.00491678
Ivancha	SP2	12.9883	13.4577	12.7357	13.0606	-0.0167802	0.0400052	-0.100589	-0.0257879	0.0050025
Ferrugineum-113	SP2	12.536	12.734	15.3827	13.5509	-0.051022	-0.0159196	0.0863465	0.00646831	0.00509344
Sadovo super	SP2	13.3047	13.8263	13.0513	13.3941	0.00716629	0.0684956	-0.0782957	-0.00087792	0.00543545
Okerman-804	SP2	13.7863	14.9643	14.3533	14.368	0.0436286	0.15644	0.0136535	0.0712407	0.00566882
Levent	SP3	15.3443	15.6733	15.0273	15.3483	0.16157	0.211231	0.0612524	0.144684	0.00583725
Yanitsa	SP1	12.8877	13.9197	13.0967	13.3013	-0.0244007	0.0757084	-0.0750942	-0.00792882	0.00588885
Velizara	SP1	12.941	13.332	12.2457	12.8396	-0.0203634	0.0302937	-0.135193	-0.0417542	0.00718964
Todora	SP1	13.697	11.7533	15.164	13.5381	0.036866	-0.0917053	0.070904	0.00535489	0.00735516
Sredets-68	SP1	14.5997	13.528	17.2313	15.1197	0.105198	0.0454405	0.216902	0.122514	0.00757464
Altimir-67	SP1	10.6017	12.6763	12.4717	11.9166	-0.197451	-0.0203761	-0.119233	-0.112353	0.00787441
Kozlovets	SP2	12.0877	10.317	13.756	12.0536	-0.0849609	-0.202705	-0.0285311	-0.105399	0.00789741
Tencha	SP2	14.476	15.404	14.3353	14.7384	0.0958365	0.190417	0.0123823	0.0995454	0.00793443
Medeya	SP1	12.7983	13.9557	12.768	13.174	-0.0311633	0.0784905	-0.0983051	-0.0169926	0.00796477
Joana	SP1	12.637	12.6343	15.8747	13.7153	-0.0433762	-0.0236218	0.121092	0.0180314	0.00806372
Sadovska ranozrejka-4	SP2	12.7263	11.3163	14.9303	12.991	-0.0366137	-0.125477	0.0544021	-0.0358961	0.00808947
Avangard	SP1	14.9167	12.308	15.126	14.1169	0.129195	-0.0488408	0.0682203	0.0495249	0.00818633
Sadovo-552	AD	12.0387	13.127	11.8063	12.324	-0.0886702	0.0144513	-0.166219	-0.0801461	0.00821497
Dobrudzhanka	SP1	12.162	13.851	15.3863	13.7998	-0.0793338	0.0704019	0.0866055	0.0258912	0.00836986
No165	SP2	14.8923	16.101	14.9113	15.3016	0.127353	0.244281	0.0530603	0.141565	0.00929285
Nova Zvezda	SP1	13.1193	13.8187	12.4033	13.1138	-0.00686349	0.0679031	-0.124058	-0.0210062	0.00936232
No301	SP2	12.4563	14.1473	12.882	13.1619	-0.0570527	0.0933024	-0.0902542	-0.0180015	0.00956701
No127	SP2	15.4357	16.5567	15.276	15.7561	0.168483	0.279495	0.0788136	0.175597	0.0101062
Duskot-171	SP2	13.5413	13.551	12.1927	13.095	0.025082	0.0472179	-0.138936	-0.022212	0.0103409
Bozhana	SP3	13.965	13.338	17.2697	14.8576	0.0571537	0.0307573	0.219609	0.102507	0.0104589
Liliya	SP1	12.808	14.2557	12.6673	13.2437	-0.0304315	0.101674	-0.105414	-0.0113905	0.0109934
Stalinka	SP2	15.179	15.747	14.2993	15.0751	0.149054	0.216924	0.00983992	0.125273	0.0111451
Druzhba	SP2	12.0767	9.475	13.0777	11.5431	-0.0857936	-0.267774	-0.076436	-0.143335	0.0116358
Kristi	SP1	13.2313	13.948	12.2377	13.139	0.00161494	0.077898	-0.135758	-0.0187484	0.0117232
Ludogorie	SP1	12.884	14.2047	12.468	13.1856	-0.0246783	0.0977331	-0.119492	-0.0154789	0.0118601
Yantar	SP1	12.9447	14.3147	12.578	13.2791	-0.0200858	0.106234	-0.111723	-0.00852502	0.0119766
Korona	SP1	12.2797	13.6417	11.839	12.5868	-0.0704264	0.0542246	-0.163912	-0.0600381	0.0119769
Ferrugineum-2	SP1	11.2157	10.908	14.6643	12.2627	-0.150971	-0.157032	0.0356168	-0.0907957	0.0119943
Nivyana	SP1	11.6947	13.389	11.6203	12.2347	-0.114711	0.0346986	-0.179355	-0.0864558	0.0120535
Nikolaj	SP1	14.1587	13.9993	12.544	13.5673	0.0718143	0.081865	-0.114124	0.013185	0.012181
No84 (Obr chiflik)	SP2	13.7087	15.483	13.817	14.3362	0.0377492	0.196522	-0.0242232	0.0700161	0.012963
Burgas-1	SP1	12.8893	10.1117	13.9423	12.3144	-0.0242745	-0.218573	-0.0153719	-0.0860731	0.013187
Antonovka	SP1	10.4327	11.8323	14.4683	12.2444	-0.210245	-0.0856002	0.021775	-0.0913567	0.0134831
Vega	SP1	14.311	15.9163	14.1607	14.796	0.083346	0.23001	4.7081e-05	0.104468	0.0135554
Demetra	SP1	12.3007	13.4237	11.3053	12.3432	-0.0688367	0.0373776	-0.201601	-0.0776866	0.0143364
Karina	SP1	14.322	11.8997	16.34	14.1872	0.0841787	-0.0803967	0.153955	0.0525789	0.0144791
Yubilejna-2	SP2	16.5187	16.7523	15.0407	16.1039	0.250467	0.294616	0.062194	0.202426	0.015236
No16 (Obr chiflik)	SP2	12.0747	14.2633	12.3023	12.8801	-0.085945	0.102267	-0.131191	-0.0382898	0.0153289
No7 (Obr chiflik)	SP2	10.9723	7.83	11.4363	10.0796	-0.169392	-0.3949	-0.192349	-0.252214	0.0154012
Vitosha	SP2	14.0773	15.218	13.072	14.1224	0.0656573	0.176043	-0.0768362	0.0549548	0.0160729
Lozen-6	SP1	15.1733	15.9127	13.8817	14.9892	0.148625	0.229727	-0.0196563	0.119565	0.0161813
Zlatoklas	SP3	12.6447	9.62533	13.9507	12.0736	-0.0427959	-0.256157	-0.0147834	-0.104579	0.0174281
Pobeda	SP1	16.1177	16.3573	14.3227	15.5992	0.220111	0.264091	0.0114878	0.16523	0.018211
Zlatina	SP1	10.8247	8.83867	13.494	11.0524	-0.18057	-0.31695	-0.0470339	-0.181518	0.0182144
Lyusil	SP1	14.3527	14.3433	12.2307	13.6422	0.0865001	0.108449	-0.136252	0.0195657	0.0183299
Krasen	SP1	13.3283	10.3037	14.9097	12.8472	0.00895786	-0.203735	0.0529426	-0.0472783	0.0188427
Karnobat-92	SP2	11.3697	13.6953	10.9487	12.0046	-0.139314	0.058372	-0.226789	-0.102577	0.0213414
Tangra	SP1	15.504	12.1393	17.0773	14.9069	0.173656	-0.0618753	0.206026	0.105936	0.0213824
No2315	SP2	10.6683	7.68	12.3977	10.2487	-0.192405	-0.406491	-0.124459	-0.241118	0.0216654
Ludogorka	SP3	16.4103	16.5757	14.2023	15.7294	0.242266	0.280963	0.00298964	0.175406	0.02267
Sofia-312	SP2	14.5503	11.413	16.7773	14.2469	0.101464	-0.118006	0.18484	0.0560991	0.0244724
Lider	SP1	14.5827	11.558	16.9883	14.3763	0.103911	-0.106801	0.199741	0.0656172	0.0245918
Vezhen	SP1	9.23967	6.92733	12.1657	9.44422	-0.300555	-0.464657	-0.140843	-0.302018	0.0262156
Maritsa	SP2	11.4607	14.4513	11.054	12.322	-0.132425	0.116795	-0.21935	-0.0783266	0.0304435
Popovo	SP2	12.0383	15.274	11.987	13.0998	-0.0886954	0.180371	-0.15346	-0.020595	0.0313391
Beliya	SP2	11.2687	7.65533	13.2623	10.7288	-0.146959	-0.408398	-0.0633945	-0.206251	0.0323934
Zlatitsa	SP1	12.1543	8.263	14.022	11.4798	-0.0799142	-0.361437	-0.00974576	-0.150366	0.0346443
No100-10	SP2	10.9497	7.41767	13.3683	10.5786	-0.171108	-0.426765	-0.0559087	-0.217927	0.0360276
Gizda	SP3	11.1647	8.01067	14.1757	11.117	-0.154832	-0.380938	0.0011064	-0.178221	0.0368997
Asenovka	SP1	11.778	9.09433	15.4983	12.1236	-0.108403	-0.297192	0.0945151	-0.103693	0.0383753
Slavyani	SP1	15.1867	12.1547	19.0783	15.4732	0.149634	-0.0606904	0.34734	0.145428	0.0416354
Vselena	SP1	10.9173	8.91833	15.6047	11.8134	-0.173555	-0.310793	0.102024	-0.127441	0.0441995
Aheloj	SP1	13.6609	8.016	13.5867	11.7545	0.0341361	-0.380526	-0.0404896	-0.12896	0.0488563
Bolyarka	SP1	8.05033	12.633	14.556	11.7464	-0.390588	-0.0237249	0.0279661	-0.128782	0.0520747
Prelom	SP1	10.7883	9.56267	17.577	12.6427	-0.183321	-0.260999	0.241314	-0.0676689	0.0731111
Tundzha	SP1	7.64367	6.27767	14.3203	9.41389	-0.421373	-0.514863	0.011323	-0.308304	0.0788064
Evmolpiya	AD	14.9947	10.3663	19.367	14.9093	0.1351	-0.198892	0.367726	0.101311	0.0811203
Zlatiya	SP1	13.2847	14.3113	7.05867	11.5516	0.00565228	0.105976	-0.501507	-0.129959	0.106052
Dimitrovka 5-11	SP2	12.3007	5.99633	15.5137	11.2702	-0.0688367	-0.536605	0.0955979	-0.169948	0.107588

## Sheet: Table-S5-deviations-TKW
Table S5. Variability and stability of thousand kernel weight (TKW) in a set of 179 bread wheat accessions.
Accession name	Subpopulation (SP)	TKW (g) 2014	TKW (g) 2017	TKW (g) 2021	TKW (g) average	Deviation from average-2014 (in %)	Deviation from average-2017 (in %)	Deviation from average-2021 (in %)	Average	Variance
Roussalka	SP1	45.222	45.6262	51.1536	47.3339	0.0494769	0.0364889	0.0523261	0.0460973	7.12701e-05
Yasen	SP1	39.6744	40.3935	45.4842	41.8507	-0.0792673	-0.082383	-0.0643046	-0.0753183	9.34026e-05
Yunak	SP3	46.1519	46.8592	52.925	48.6454	0.0710571	0.0644981	0.0887683	0.0747745	0.000157625
Zagore	SP1	44.5942	44.4103	50.3095	46.438	0.0349085	0.00886633	0.034962	0.0262456	0.000226531
Gizda	SP3	38.8032	38.0302	42.5686	39.8006	-0.0994846	-0.136071	-0.124284	-0.119946	0.000348749
Lozen-6	SP1	39.0766	38.2649	43.7548	40.3654	-0.0931399	-0.130739	-0.0998816	-0.10792	0.000401884
Vega	SP1	39.277	41.358	46.2018	42.2789	-0.0884892	-0.0604722	-0.0495415	-0.0661677	0.000403559
Krapets	SP1	42.7445	44.4969	50.2328	45.8248	-0.0080176	0.0108341	0.0333843	0.012067	0.00042967
Korona	SP1	38.2493	39.0752	44.976	40.7668	-0.11234	-0.112331	-0.0747582	-0.0998097	0.000470683
Stolets	SP1	41.2133	41.1739	47.6966	43.3613	-0.043554	-0.064654	-0.0187907	-0.0423329	0.000526979
Kardam	SP1	41.1413	43.9125	48.1959	44.4166	-0.0452236	-0.00244164	-0.00851793	-0.0187277	0.000535753
Dragana	SP1	50.2275	50.0289	54.3977	51.5514	0.165642	0.136505	0.119064	0.140404	0.00055378
Sadovo-772	SP1	41.318	42.3337	44.6639	42.7719	-0.0411235	-0.0383072	-0.0811795	-0.0535367	0.000575074
Plamuk	SP1	43.0112	43.275	50.075	45.4537	-0.00182975	-0.0169249	0.0301376	0.00379432	0.000577443
Sadovo super	SP2	37.8792	36.5448	41.5447	38.6563	-0.120928	-0.169813	-0.145346	-0.145363	0.000597431
Rada	SP2	47.4896	50.7705	54.699	50.9864	0.102103	0.153352	0.125262	0.126905	0.000658645
Altimir-67	SP1	42.5283	42.1388	49.0266	44.5646	-0.0130348	-0.042735	0.00857049	-0.0157331	0.000663523
Nikolaj	SP1	37.8817	40.9471	43.658	40.829	-0.12087	-0.0698061	-0.101872	-0.097516	0.000666109
Evmolpiya	AD	42.59	45.0665	50.6867	46.1144	-0.0116031	0.0237723	0.0427221	0.0182971	0.00076029
Vikhar	SP1	47.7981	47.4888	51.1518	48.8129	0.109261	0.0788002	0.0522887	0.0801168	0.000812772
Zlatiya	SP1	46.1838	49.41	52.1392	49.2443	0.0717982	0.122445	0.0726023	0.0889486	0.000841682
Antonovka	SP1	50.593	49.0891	55.982	51.888	0.174125	0.115154	0.151657	0.146978	0.00088581
Nova Zvezda	SP1	43.0186	46.0779	51.1901	46.7622	-0.00165679	0.0467494	0.0530774	0.0327233	0.000896505
Momchil	SP3	45.7203	44.1857	49.188	46.3647	0.0610423	0.00376342	0.0118904	0.0255654	0.000960471
No2315	SP2	46.203	45.6504	48.9068	46.9201	0.0722444	0.0370383	0.00610526	0.0384627	0.00109512
No7 (Obr chiflik)	SP2	40.7543	41.5089	43.0446	41.7693	-0.0542047	-0.0570437	-0.11449	-0.0752463	0.00115709
Ogosta	SP1	45.5757	43.7363	50.8442	46.7188	0.0576872	-0.00644376	0.0459614	0.0324016	0.00116609
Tangra	SP1	44.1434	43.6804	46.3855	44.7364	0.0244459	-0.00771579	-0.0457618	-0.00967724	0.00123516
Bononiya	SP3	45.1497	49.2794	52.7123	49.0471	0.0477994	0.119476	0.084392	0.0838893	0.00128459
No312	SP2	46.3576	49.5255	51.2848	49.056	0.0758313	0.125068	0.0550258	0.0853085	0.00129385
Ludogorka	SP3	44.378	47.0606	48.4699	46.6362	0.029891	0.0690734	-0.00288277	0.0320272	0.00129784
Kristora	SP1	38.3334	36.071	42.4119	38.9388	-0.110388	-0.180578	-0.127506	-0.139491	0.00133939
Pryaspa	SP1	46.8604	45.3326	53.3646	48.5192	0.0875015	0.0298181	0.0978112	0.0717103	0.00134279
Ludogorie	SP1	34.9116	37.8479	42.8678	38.5424	-0.189798	-0.14021	-0.118129	-0.149379	0.00134718
Boryana	SP1	48.039	47.0561	50.6558	48.5837	0.114853	0.0689719	0.0420867	0.0753039	0.00135381
Popovo	SP2	42.1106	41.1375	43.9009	42.383	-0.0227282	-0.0654809	-0.0968753	-0.0616948	0.0013852
Medeya	SP1	40.7173	44.0147	49.3926	44.7082	-0.0550637	-0.000120751	0.0161003	-0.013028	0.00139103
Kremena	SP3	43.7188	41.7516	45.8215	43.764	0.0145931	-0.0515304	-0.0573657	-0.0314343	0.00159741
Vezhen	SP1	39.2021	38.4537	46.4929	41.3829	-0.0902282	-0.12645	-0.0435536	-0.0867438	0.00172704
Karnobatska ranozrejka	SP2	49.0395	49.0138	51.3513	49.8015	0.138072	0.113444	0.0563931	0.102636	0.00175545
Lada	SP1	41.5019	40.7468	49.0764	43.775	-0.0368557	-0.0743566	0.00959452	-0.0338726	0.00176862
Guinness	SP3	44.3802	47.0544	54.2121	48.5489	0.0299415	0.0689329	0.115246	0.0713734	0.00182367
Vselena	SP1	53.7569	51.3893	57.2631	54.1364	0.24755	0.167407	0.178011	0.197656	0.00189516
No16 (Obr chiflik)	SP2	43.676	44.4918	45.4527	44.5402	0.0135993	0.0107179	-0.0649524	-0.0135451	0.00198411
Sofia-312	SP2	46.0586	48.5992	49.3027	47.9868	0.0688925	0.104027	0.0142493	0.0623894	0.00204671
Stoyana	SP1	40.5404	44.0759	44.3546	42.9903	-0.0591684	0.00126994	-0.087541	-0.0484798	0.00205753
Slavyanka	SP1	42.2207	42.8857	51.3159	45.4741	-0.0201741	-0.0257684	0.0556664	0.00324129	0.00206912
Toshevka	SP1	46.4813	47.2207	48.3318	47.3446	0.0787016	0.0727095	-0.00572337	0.0485626	0.0022192
Tundzha	SP1	41.9995	46.4217	47.1471	45.1894	-0.0253078	0.0545584	-0.0300951	-0.000281507	0.00226129
Skitiya	SP1	41.5641	38.2552	44.7669	41.5287	-0.0354126	-0.13096	-0.0790595	-0.0818105	0.00228798
Karina	SP1	40.5841	39.536	48.3311	42.8171	-0.0581553	-0.101862	-0.00573749	-0.0552517	0.00231632
Kristal	SP1	42.8183	41.8104	50.8743	45.1677	-0.00630648	-0.0501961	0.0465816	-0.00330699	0.00234823
Polena	SP1	37.1556	41.5434	41.6235	40.1075	-0.137722	-0.0562614	-0.143725	-0.112569	0.00238694
Burgas-1	SP1	44.1907	49.3855	52.974	48.8501	0.0255444	0.121888	0.0897764	0.0790696	0.0024065
Asenovka	SP1	52.5414	49.7362	58.8893	53.7223	0.21934	0.129854	0.211465	0.186886	0.00245505
Svilena	SP1	39.9137	44.3987	44.4691	42.9271	-0.0737134	0.00860202	-0.0851862	-0.0500992	0.00261728
Todora	SP1	36.4343	41.6024	44.5205	40.8524	-0.15446	-0.0549212	-0.0841296	-0.0978369	0.00261791
Trapezitsa	SP2	38.8451	40.294	48.5055	42.5482	-0.0985114	-0.0846425	-0.00214927	-0.0617677	0.00271386
Pliska	SP1	37.7268	35.1203	43.8093	38.8854	-0.124466	-0.202175	-0.0987597	-0.1418	0.00289905
Charodejka	SP1	44.4015	40.605	47.2224	44.0763	0.0304369	-0.0775794	-0.0285451	-0.0252292	0.00292513
Nivyana	SP1	52.8744	49.9273	54.837	52.5462	0.227069	0.134197	0.128101	0.163122	0.00307618
Knezha	SP2	45.5228	47.3238	47.1823	46.6763	0.0564582	0.0750531	-0.0293697	0.0340472	0.00310272
Mustang	SP1	54.2218	51.3204	56.2425	53.9282	0.258339	0.165843	0.157014	0.193732	0.00315002
Prelom	SP1	53.2075	49.4046	57.4178	53.3433	0.234799	0.122322	0.181194	0.179438	0.00316505
Zlatina	SP1	41.4836	47.3787	49.7413	46.2012	-0.0372798	0.0762986	0.023273	0.0207639	0.00322974
Rekord	SP1	40.4835	38.0721	40.2104	39.5887	-0.0604887	-0.135119	-0.172795	-0.122801	0.00326699
No1438	SP2	41.9727	47.8434	51.3069	47.041	-0.0259287	0.086856	0.055481	0.0388028	0.00338872
Yubilejna-2	SP2	46.0426	46.5374	46.7857	46.4552	0.0685219	0.057188	-0.0375288	0.0293937	0.00339108
Karat	SP1	44.5916	40.4211	47.389	44.1339	0.0348481	-0.0817556	-0.0251189	-0.0240088	0.00340004
Kiara	SP1	43.9799	47.471	55.2898	48.9136	0.020652	0.0783961	0.137415	0.0788211	0.00340855
No264	SP2	42.2937	48.0745	48.7793	46.3825	-0.0184811	0.0921048	0.00348281	0.0257022	0.00342759
Polyak	SP2	42.4362	39.9668	42.2802	41.561	-0.015174	-0.0920771	-0.130217	-0.0791559	0.00343391
No100-10	SP2	41.9467	47.8924	51.3476	47.0622	-0.0265321	0.087969	0.0563168	0.0392512	0.00349605
Dobrudzhanka	SP1	30.0384	31.647	39.3422	33.6759	-0.302892	-0.281077	-0.190656	-0.258208	0.00354145
Nadezhda-2	SP2	49.052	52.4481	52.1283	51.2095	0.138362	0.19146	0.0723772	0.134067	0.00355902
Trakiya	SP1	43.5509	49.7856	52.1128	48.4831	0.0106968	0.130976	0.0720594	0.0712442	0.00361729
Preslav	SP1	42.9803	39.9807	49.7169	44.2259	-0.00254641	-0.0917613	0.0227705	-0.0238457	0.00361963
Puldin	SP1	45.7782	45.8184	46.0922	45.8963	0.0623849	0.0408553	-0.0517957	0.0171482	0.00368082
Sadovo-552	AD	42.5877	47.3464	46.5189	45.4844	-0.011657	0.0755663	-0.043017	0.0069641	0.00377556
Dobrotitsa	SP1	44.4535	43.3722	53.9003	47.242	0.0316425	-0.0147165	0.108832	0.0419195	0.0038953
Tsarevets	SP1	35.9439	42.2195	43.8832	40.6822	-0.165841	-0.040902	-0.0972394	-0.101327	0.00391497
Slomer	SP2	46.2983	46.2875	46.482	46.3559	0.0744564	0.0515097	-0.0437776	0.0273962	0.00393092
Miziya	SP1	41.0351	43.8407	52.308	45.7279	-0.0476881	-0.00407367	0.0760739	0.00810405	0.00394048
Pobeda	SP1	47.5169	43.174	51.9926	47.5612	0.102736	-0.0192192	0.0695863	0.0510344	0.0039764
Albena	SP1	52.2687	48.6911	53.4994	51.4864	0.213011	0.106114	0.100584	0.139903	0.00401627
Laska	SP1	49.5332	45.417	54.9981	49.9828	0.149528	0.0317349	0.131416	0.104226	0.00402326
Lyusil	SP1	43.4849	46.5283	55.195	48.4027	0.00916507	0.0569803	0.135466	0.0672038	0.00406636
Strelets	SP1	51.9197	48.2405	58.7325	52.9642	0.204913	0.0958779	0.208238	0.169676	0.00408742
Lider	SP1	43.0266	44.0736	54.1032	47.0678	-0.0014709	0.00121865	0.113006	0.0375846	0.00426811
Stozher	SP2	43.7755	39.6815	49.3941	44.2837	0.0159078	-0.098557	0.0161304	-0.0221729	0.0043759
Aheloj	SP1	43.0254	38.3725	43.5298	41.6426	-0.00149909	-0.128293	-0.10451	-0.0781007	0.00454227
Tencha	SP2	45.2958	42.0993	44.6743	44.0231	0.0511916	-0.0436331	-0.0809646	-0.0244687	0.00464177
Yantar	SP1	40.4397	42.9396	52.0534	45.1442	-0.0615066	-0.0245438	0.0708383	-0.00507069	0.00466319
Lazarka	SP1	47.5197	42.8607	52.3645	47.5816	0.102801	-0.0263368	0.077238	0.0512341	0.0046763
Nedan	SP2	36.4493	43.1638	45.6851	41.7661	-0.154112	-0.0194494	-0.0601704	-0.0779107	0.00476955
Gladiator-113	SP1	32.8584	39.7391	40.117	37.5715	-0.237447	-0.0972494	-0.174717	-0.169804	0.00493193
Bolyarka	SP1	47.5899	51.8195	60.5688	53.3261	0.10443	0.177181	0.246014	0.175875	0.00501282
Kaloyan	SP1	39.7994	40.8614	38.9751	39.8787	-0.0763661	-0.0717527	-0.198207	-0.115442	0.00514287
KM-135	AD	42.2646	37.1711	46.3136	41.9164	-0.0191549	-0.155587	-0.0472423	-0.0739948	0.00519021
Sofia-40	SP2	48.5235	45.0454	47.9048	47.1579	0.126097	0.023294	-0.0145074	0.0449613	0.00529451
Slavyani	SP1	46.5223	44.4369	45.3459	45.435	0.0796548	0.0094702	-0.0671495	0.00732516	0.00539132
Trayana	SP3	40.0249	47.1424	50.173	45.7801	-0.0711334	0.0709315	0.0321529	0.0106503	0.00539237
No165	SP2	40.4687	40.3055	38.9363	39.9035	-0.0608338	-0.084383	-0.199007	-0.114741	0.00546416
Ideal	SP1	44.3719	38.7473	46.8291	43.3161	0.0297495	-0.119779	-0.0366359	-0.0422219	0.00561311
Kristi	SP1	40.862	47.5282	46.1996	44.8633	-0.051705	0.0796954	-0.0495864	-0.00719866	0.00566405
Kiten	AD	43.5918	37.9629	46.4918	42.6821	0.0116444	-0.137599	-0.0435759	-0.0565102	0.00569388
Slaveya	SP1	39.5597	45.178	51.6932	45.4769	-0.0819294	0.0263066	0.0634265	0.00260124	0.00570355
Kaliakra-2	SP1	40.6032	37.5331	48.7837	42.3067	-0.0577124	-0.147362	0.00357427	-0.0671667	0.00576248
Zlatoklas	SP3	41.1374	37.4067	48.4924	42.3455	-0.0453152	-0.150235	-0.00242008	-0.0659899	0.00578286
Sadovo-1	SP1	49.7512	46.2445	48.897	48.2976	0.154587	0.0505346	0.00590407	0.070342	0.00582093
Milena	SP3	47.273	44.5849	45.7178	45.8586	0.097076	0.0128324	-0.0594985	0.0168033	0.00614072
Yubilejna-3	SP3	40.2453	46.4953	44.0527	43.5978	-0.0660181	0.0562313	-0.0937528	-0.0345132	0.00636823
Duskot-171	SP2	45.0213	44.6155	43.4209	44.3526	0.0448211	0.0135278	-0.10675	-0.0161336	0.00640329
Hrabrets	SP1	53.3261	47.4287	56.3133	52.356	0.237551	0.0774363	0.158472	0.15782	0.00640951
Bozhana	SP3	52.136	47.115	52.0057	50.4189	0.209932	0.0703079	0.0698554	0.116698	0.00651943
Slaven	SP1	39.8606	44.0018	52.81	45.5575	-0.0749459	-0.000413877	0.086403	0.00368107	0.00652094
Liliya	SP1	35.6275	43.5815	45.69	41.633	-0.173184	-0.00996056	-0.060069	-0.0810711	0.00699127
Velizara	SP1	41.7764	43.0788	54.4196	46.425	-0.0304845	-0.0213806	0.119515	0.0225501	0.00707243
Yanitsa	SP1	40.9117	48.9603	52.0291	47.3004	-0.0505513	0.112228	0.070337	0.0440047	0.00714434
No1153	SP2	50.0747	48.3195	48.205	48.8664	0.162096	0.097671	-0.00833169	0.0838116	0.00740542
Diamant	SP1	48.3437	42.1416	52.6666	47.7173	0.121924	-0.0426714	0.0834521	0.0542351	0.00741317
Krasen	SP1	36.6926	45.2525	46.0793	42.6748	-0.148465	0.0279975	-0.0520618	-0.0575098	0.00780703
Merilin	SP1	48.3471	41.705	48.9569	46.3363	0.122004	-0.0525904	0.00713668	0.0255166	0.00787414
Katya	SP1	44.7825	37.9135	47.1421	43.2794	0.0392777	-0.138721	-0.0301974	-0.0432135	0.00804792
Aglika	SP1	37.1172	41.9866	50.6656	43.2564	-0.138613	-0.0461927	0.0422871	-0.0475061	0.00818249
Karnobat-92	SP2	47.9864	47.5604	45.8044	47.1171	0.113633	0.0804281	-0.0577166	0.0454481	0.00825786
Avangard	SP1	41.7639	34.4998	42.7049	39.6562	-0.0307758	-0.21627	-0.12148	-0.122842	0.00860338
No84 (Obr chiflik)	SP2	39.4911	47.2745	44.1429	43.6361	-0.0835205	0.0739312	-0.0918978	-0.033829	0.00872674
Dona	SP1	48.0108	40.7442	50.192	46.3157	0.114198	-0.0744161	0.0325454	0.0241091	0.0089472
Fermer	SP1	49.8818	42.557	51.3192	47.9193	0.157619	-0.033236	0.0557327	0.0600385	0.00912028
Nova Sadovka	SP3	53.6452	49.8572	51.2207	51.5744	0.244957	0.132604	0.0537074	0.143756	0.00923738
Petya	SP1	36.2099	39.699	50.0118	41.9736	-0.159668	-0.0981591	0.0288376	-0.0763297	0.00924096
Predela	SP1	54.1789	47.0442	58.3988	53.2073	0.257343	0.0687007	0.201373	0.175806	0.00938679
Elitsa	SP1	37.5316	46.9224	46.6448	43.6996	-0.128995	0.065934	-0.0404271	-0.034496	0.0095257
Galateya	SP1	41.2174	42.3053	54.9764	46.1663	-0.0434585	-0.0389536	0.130969	0.0161855	0.00988643
Panaceya	SP1	48.6854	40.9599	51.9824	47.2093	0.129855	-0.069515	0.0693765	0.0432387	0.0104495
Ferrugineum-2	SP1	45.3901	37.5817	44.1416	42.3712	0.0533801	-0.146259	-0.0919225	-0.0616005	0.0106535
Zlatitsa	SP1	49.6881	41.6614	50.5449	47.2982	0.153125	-0.0535793	0.0398055	0.0464503	0.0107147
No127	SP2	50.6511	53.0628	49.211	50.975	0.175471	0.205425	0.0123632	0.131087	0.0107958
Iveta	SP1	46.0402	39.5535	52.892	46.1619	0.0684661	-0.101465	0.0880897	0.0183636	0.0108655
No301	SP2	46.3531	56.4312	58.7429	53.8424	0.0757271	0.281944	0.208452	0.188708	0.0109238
Zora	SP1	40.3707	50.0491	54.0973	48.1723	-0.0631073	0.136962	0.112883	0.062246	0.01193
Erythrospermum 19-16	SP1	39.4347	31.0243	41.9279	37.4623	-0.0848301	-0.295223	-0.137463	-0.172505	0.0119873
Anna	SP1	31.1445	39.1223	45.197	38.4879	-0.277222	-0.11126	-0.0702127	-0.152898	0.0120136
Ivancha	SP2	50.4697	43.9147	46.7466	47.0437	0.171263	-0.00239225	-0.0383339	0.0435122	0.0125631
Levent	SP3	53.3222	48.9519	48.5114	50.2618	0.237461	0.112038	-0.00202793	0.115824	0.0143495
Demetra	SP1	43.3583	34.6077	39.3411	39.1024	0.00622589	-0.213819	-0.190679	-0.132757	0.0146211
Bulgarische weizen-44	SP2	47.3259	44.6971	41.7877	44.6036	0.098304	0.0153809	-0.140347	-0.00888738	0.0146803
No159-early (Obr chiflik)	SP2	42.5066	37.7633	36.1142	38.7947	-0.0135388	-0.142133	-0.257062	-0.137578	0.0148415
No14 (Obr chiflik)	SP2	44.78	40.2935	38.6204	41.2313	0.0392208	-0.0846538	-0.205505	-0.0836461	0.0149735
Neda	SP1	40.6309	50.1593	56.8206	49.2036	-0.0570684	0.139466	0.168907	0.0837681	0.0150929
Enola	SP1	37.397	38.673	52.783	42.951	-0.132119	-0.121468	0.0858465	-0.0559133	0.0151002
Joana	SP1	54.3766	46.2111	50.5278	50.3719	0.261932	0.0497748	0.0394538	0.117053	0.0157689
Okerman-804	SP2	38.1198	41.2401	55.2314	44.8638	-0.115345	-0.0631516	0.136216	-0.0140938	0.0176257
Goritsa	SP1	42.9241	32.1923	43.5523	39.5562	-0.00384976	-0.268689	-0.104047	-0.125529	0.017881
Yana	SP1	26.9371	37.2466	42.3349	35.5062	-0.374865	-0.153871	-0.129092	-0.219276	0.0183095
Niki	SP1	35.0729	45.0148	52.1158	44.0678	-0.186055	0.0225979	0.0721217	-0.0304451	0.018774
Prostor	SP3	43.454	55.4807	50.5386	49.8245	0.00844816	0.260353	0.0396752	0.102825	0.018855
Slavejno	SP1	42.694	42.6215	59.3098	48.2084	-0.00919064	-0.0317694	0.220116	0.0597187	0.019423
Murgavets	SP1	37.4085	49.6075	53.3623	46.7928	-0.131852	0.126932	0.097764	0.0309478	0.0200906
Progres	SP1	44.2465	58.1819	55.2859	52.5714	0.0268397	0.321714	0.137336	0.161963	0.0221926
Merkur	SP2	27.8982	41.2725	41.5399	36.9035	-0.352559	-0.0624156	-0.145444	-0.186807	0.022329
Kozlovets	SP2	40.0068	47.5968	37.9615	41.855	-0.0715529	0.0812542	-0.21906	-0.0697861	0.0225495
Kalina	SP1	53.0657	43.3391	61.6212	52.6753	0.231507	-0.0154677	0.267666	0.161235	0.0237448
Hebros	SP3	49.2364	37.7884	42.564	43.1962	0.142641	-0.141563	-0.124379	-0.0411004	0.0253944
Dunavka	SP2	46.1952	47.4605	38.5507	44.0688	0.0720624	0.0781574	-0.206939	-0.0189064	0.0265265
Druzhba	SP2	34.0804	47.2656	53.2368	44.8609	-0.209089	0.0737292	0.0951817	-0.0133926	0.0288378
Okerman-17	SP2	37.9331	50.2428	59.4492	49.2083	-0.119678	0.141362	0.222983	0.0815556	0.0320367
Pavlinka	AD	54.3219	42.2781	45.2833	47.2945	0.260662	-0.0395701	-0.0684357	0.0508855	0.033213
Beliya	SP2	31.13	47.3375	49.8796	42.7824	-0.277558	0.0753628	0.0261186	-0.0586922	0.0365329
Dimitrovka 5-11	SP2	22.1715	39.3925	41.0562	34.2068	-0.485461	-0.105122	-0.155396	-0.248659	0.042688
Stalinka	SP2	28.9844	46.5847	50.6039	42.0576	-0.327353	0.0582611	0.0410184	-0.0760245	0.0474488
Sredets-68	SP1	26.2142	41.8595	49.337	39.1369	-0.391641	-0.049079	0.0149562	-0.141921	0.0477951
Sadovska ranozrejka-4	SP2	25.9375	37.1438	52.0618	38.3811	-0.398061	-0.156207	0.0710108	-0.161086	0.055025
Maritsa	SP2	26.772	48.3619	46.5615	40.5651	-0.378697	0.0986352	-0.0421425	-0.107401	0.0601555
Vitosha	SP2	26.5326	47.5342	49.0842	41.0503	-0.384252	0.0798322	0.00975438	-0.098222	0.0625878
No182	SP2	65.8142	48.8708	50.292	54.9923	0.527366	0.110195	0.0346017	0.224054	0.070427
Primorets	SP2	45.0373	39.0203	24.4444	36.1674	0.0451916	-0.113577	-0.497131	-0.188506	0.0777392
Ferrugineum-113	SP2	58.3594	50.728	35.5906	48.226	0.35436	0.152386	-0.267833	0.0796378	0.10075
			Variance across the genotypes:			0.022275	0.011	0.0124155

## Sheet: Table-S6-LD decay
Table S6. Values of linkage disequillibrium (LD) decay for each chromosome, homoeologous group and genome in a set of 179 old and modern bread wheat accessions from Bulgaria.
Homoeologous group/Genome	A	B	D	Average
1	2	1.5	2.5	2
2	1.5	1.7	2.6	1.93333
3	2	1.8	3	2.26667
4	2	1.7	1.7	1.8
5	2	1.5	2	1.83333
6	1.5	2	3	2.16667
7	1	1.5	3	1.83333
Average	1.71429	1.67143	2.54286
Total average:	1.97619

## Sheet: Table-S7-QTLs-GPC
Table S7. Quantitative trait loci (QTL) for grain protein content (GPC) identified by GWAS analysis in a set of 179 old and modern bread wheat accessions from Bulgaria
QTL	Env	SNP	Chr	Position (bp)	Allele	p-value	-log10(p)	Effect	R2
QGpc.ippg-1A.1	BLUE	RAC875_c14066_452	1A	34173087	A/G	1.6522e-07	6.78194	8.10913	0.16891
	BLUE	AX-158560632	1A	34396573	A/G	1.6436e-07	6.7842	8.11737	0.16841
	BLUE	RAC875_c10090_963	1A	35933888	A/C	4.8123e-08	7.31765	8.62089	0.18462
	BLUE	Excalibur_c7237_1084	1A	36568439	A/G	4.4144e-08	7.35513	-8.7434	0.18575
QGpc.ippg-1A.2	BLUE	AX-94522764	1A	45581400	A/G	1.6087e-08	7.79352	7.20019	0.19846
	BLUE	Tdurum_contig9199_714	1A	45796960	A/G	2.037e-08	7.69101	-7.1784	0.19598
	BLUE	RFL_Contig3232_1224	1A	45797147	T/C	4.2797e-08	7.36859	7.19384	0.1856
	BLUE	BS00067339_51	1A	46236183	T/C	3.2017e-08	7.49462	7.34671	0.19055
	BLUE	Ra_c27593_460	1A	46238712	A/C	2.0967e-08	7.67846	7.10288	0.19591
	BLUE	Excalibur_c12215_352	1A	46239692	A/G	2.055e-07	6.68719	-6.8182	0.16564
	BLUE	Tdurum_contig5008_635	1A	47791193	A/G	4.1023e-08	7.38697	7.17425	0.18616
	BLUE	Tdurum_contig5008_556	1A	47791272	T/C	1.434e-07	6.84345	-7.1422	0.17077
	BLUE	Kukri_rep_c107771_588	1A	48725998	T/G	4.1274e-08	7.38432	7.22349	0.1864
	BLUE	AX-95079481	1A	48773418	A/G	6.7229e-08	7.17244	7.01195	0.18032
	BLUE	AX-158569384	1A	48831197	T/C	6.8705e-08	7.16301	7.02833	0.17956
	BLUE	AX-95087496	1A	49099181	T/G	7.4724e-08	7.12654	7.14768	0.1792
	BLUE	IACX5982	1A	49153571	A/C	8.6147e-07	6.06476	6.07702	0.14792
	BLUE	BobWhite_c4646_119	1A	49153607	T/C	2.2362e-06	5.65049	-5.9564	0.14267
	BLUE	RAC875_c5544_4156	1A	49287756	A/G	1.8743e-06	5.72716	5.84588	0.13748
QGpc.ippg-1A.3	BLUE	Ex_c12763_662	1A	352013361	T/C	2.9338e-06	5.53257	5.65361	0.13222
	BLUE	wsnp_Ex_c1374_2630879	1A	352137608	A/G	2.7905e-06	5.55432	5.66816	0.13302
	BLUE	wsnp_Ex_c8885_14842394	1A	352173552	T/C	1.652e-06	5.78199	-5.8572	0.13945
	BLUE	wsnp_Ex_c21592_30743513	1A	353255812	A/G	1.8648e-06	5.72937	-5.8695	0.13794
	BLUE	RAC875_c33300_141	1A	354303756	A/G	1.5592e-06	5.8071	-5.8827	0.1399
	BLUE	wsnp_JD_c40990_29127031	1A	354934963	A/G	1.4258e-06	5.84594	-5.9254	0.14094
	BLUE	Excalibur_c17872_137	1A	355335975	T/G	1.9402e-06	5.71215	-5.8445	0.13712
QGpc.ippg-1B	BLUE	Tdurum_contig8158_269	1B	564162722	A/G	1.0093e-06	5.99598	5.75597	0.14554
	BLUE	Excalibur_c14911_976	1B	565669890	T/C	2.8629e-06	5.54319	5.87905	0.13224
	BLUE	Tdurum_contig42852_667	1B	565672725	A/G	2.9402e-06	5.53162	5.58058	0.13226
QGpc.ippg-1D	BLUE	wsnp_Ex_c9577_15855968	1D	422681521	T/C	1.4553e-06	5.83705	-5.781	0.14093
	BLUE	wsnp_Ex_c29613_38622101	1D	423035496	A/G	2.8234e-06	5.54923	-5.6941	0.13274
	BLUE	Excalibur_c19857_549	1D	423044772	T/G	2.9293e-06	5.53324	5.63412	0.13263
	BLUE	Ra_c27073_507	1D	423270119	A/G	2.7022e-06	5.56828	-5.7047	0.1336
	BLUE	Ra_c11906_1417	1D	423858612	T/C	1.5837e-06	5.80033	5.80946	0.13991
QGpc.ippg-2A	BLUE	Ku_c59581_1412	2A	498043601	A/G	2.5847e-07	6.58759	6.85394	0.16254
	BLUE	Ra_c71628_188	2A	498044097	A/G	5.5931e-09	8.25235	7.89827	0.21328
	BLUE	wsnp_Ex_rep_c66615_64916512	2A	498104973	T/C	2.4352e-07	6.61347	6.75501	0.16324
	BLUE	wsnp_Ex_rep_c66615_64916114	2A	498105377	T/C	3.0245e-07	6.51935	-6.8408	0.1604
	BLUE	Ra_c22880_760	2A	498105752	A/G	4.1741e-09	8.37944	7.91821	0.21658
QGpc.ippg-2B.1	BLUE	AX-158541021	2B	648653994	A/G	1.9372e-07	6.71283	-6.2329	0.16608
	BLUE	Kukri_c4294_371	2B	648920775	A/G	1.6454e-07	6.78373	6.24047	0.16893
	BLUE	AX-109906711	2B	649481074	T/C	1.9452e-07	6.71104	-6.2341	0.16618
	BLUE	AX-89474535	2B	649975875	A/G	2.0852e-07	6.68085	-6.2308	0.16613
	BLUE	AX-94392210	2B	650485729	A/C	2.0775e-07	6.68246	-6.2295	0.16603
QGpc.ippg-2B.2	BLUE	Tdurum_contig56876_365	2B	726547712	T/C	1.0965e-06	5.95999	5.78089	0.14443
	BLUE	Tdurum_contig45468_674	2B	727219949	T/C	1.7823e-06	5.74902	-5.7766	0.14051
	BLUE	AX-94408415	2B	728397956	T/C	1.2732e-06	5.8951	-5.814	0.14229
QGpc.ippg-2D	BLUE	Excalibur_c39215_100	2D	55140971	A/G	8.7738e-09	8.05681	13.3631	0.20682
	BLUE	Excalibur_c3574_607	2D	55369731	T/C	1.3472e-08	7.87057	-13.369	0.20092
	BLUE	D_contig28346_467	2D	56321705	T/C	6.0472e-09	8.21845	-13.783	0.22245
	BLUE	D_GDRF1KQ01A0AOV_75	2D	56581813	A/G	1.3838e-08	7.85893	-13.524	0.20106
	BLUE	D_GBB4FNX01A1ZCW_138	2D	56805578	T/C	1.2814e-08	7.89232	-13.397	0.20166
	BLUE	D_GBUVHFX02GV41H_67	2D	57081231	A/G	9.4832e-09	8.02305	13.4876	0.20605
	BLUE	Excalibur_c59090_145	2D	59006864	T/C	1.3115e-08	7.88223	-13.302	0.20128
QGpc.ippg-3A.1	BLUE	BS00032524_51	3A	56140225	T/C	6.1753e-07	6.20934	-6.6763	0.15291
	BLUE	BS00065468_51	3A	56394563	A/G	1.1694e-06	5.93204	6.55657	0.14394
	BLUE	BS00094366_51	3A	56397880	T/C	1.2633e-06	5.89849	6.28248	0.14507
	BLUE	AX-111007414	3A	56398439	A/G	1.1436e-06	5.94173	6.54963	0.14479
	BLUE	BS00007502_51	3A	56399640	A/G	9.5119e-07	6.02173	6.56703	0.14627
	BLUE	Excalibur_c10079_1585	3A	56675601	A/G	1.1676e-06	6.12102	-6.4244	0.15091
	BLUE	RAC875_c2464_274	3A	56676114	A/G	1.1676e-06	5.93271	6.55741	0.14398
	BLUE	IAAV2646	3A	56676137	T/C	1.0507e-06	5.97852	-6.3121	0.14502
	BLUE	AX-158524104	3A	56764859	A/G	1.0974e-06	5.95964	6.32765	0.14663
	BLUE	Tdurum_contig86206_149	3A	57012985	A/C	1.0646e-06	5.97281	6.52412	0.14516
QGpc.ippg-3A.2	BLUE	wsnp_Ex_c11039_17902115	3A	485598205	A/G	4.9179e-07	6.30822	-6.3929	0.15431
	BLUE	wsnp_BE443995B_Ta_2_2	3A	487437383	T/C	6.2149e-07	6.20657	-6.3381	0.15209
	BLUE	Kukri_rep_c112061_617	3A	487438242	T/C	7.453e-07	6.12767	6.28719	0.151
	BLUE	wsnp_Ex_rep_c69577_68526990	3A	487458253	T/C	9.4699e-07	6.02365	6.54583	0.14805
	BLUE	BS00110452_51	3A	487854537	A/G	8.3169e-07	6.08004	-6.56	0.14912
	BLUE	AX-110936122	3A	487861184	T/C	8.7419e-07	6.05839	-6.5443	0.1489
QGpc.ippg-3A.3	BLUE	Excalibur_rep_c76510_255	3A	515889945	T/C	2.6649e-07	6.57432	-6.0866	0.16342
	BLUE	BobWhite_c48560_103	3A	516632034	A/C	1.2134e-06	5.916	-5.7713	0.14493
	BLUE	AX-110475661	3A	516634942	A/T	3.9475e-07	6.40368	-6.0935	0.1582
	BLUE	AX-94798864	3A	516790713	A/G	7.2897e-07	6.13729	5.9636	0.15014
	BLUE	Ku_c28597_514	3A	517074804	T/C	1.4074e-06	5.85158	5.75846	0.14194
	BLUE	Tdurum_contig59782_86	3A	517075014	T/C	1.1146e-06	5.95288	5.79313	0.1443
	BLUE	BobWhite_c9468_453	3A	517075174	A/G	2.6125e-07	6.58294	-6.087	0.16266
	BLUE	wsnp_Ex_c22766_31972202	3A	517076647	A/C	4.0936e-07	6.38789	-6.0023	0.15882
	BLUE	TA001068-0306-w	3A	517095290	T/C	5.67e-07	6.24642	-6.0023	0.15281
	BLUE	RAC875_c53864_310	3A	517662435	T/C	5.1501e-07	6.28818	-6.0045	0.15513
	BLUE	wsnp_Ra_c7280_12576178	3A	517664962	A/G	4.9736e-07	6.30333	-6.0043	0.15409
	BLUE	RAC875_c11672_1240	3A	518489400	T/G	1.0246e-06	5.98945	5.81655	0.1463
	BLUE	wsnp_Ex_c9458_15679797	3A	519083151	A/G	9.0268e-07	6.04447	5.82429	0.14666
	BLUE	wsnp_Ex_c12948_20511479	3A	519207678	T/C	8.8371e-07	6.05369	5.84468	0.14745
	BLUE	BobWhite_c42102_237	3A	519210010	A/G	1.192e-06	5.92372	5.78356	0.14366
QGpc.ippg-3A.4	BLUE	TA004174-0504	3A	521305030	A/G	1.4679e-06	5.8333	-5.7604	0.14172
	BLUE	BobWhite_c34548_96	3A	522059012	A/C	6.3338e-07	6.19834	-6.1768	0.15297
	BLUE	AX-158523730	3A	522240993	T/C	1.1904e-06	5.92431	5.99812	0.14313
	BLUE	TA002508-0190	3A	522272515	T/C	1.1035e-06	5.95723	-5.803	0.14594
	BLUE	Kukri_rep_c70927_886	3A	523546428	T/C	2.4278e-06	5.61479	5.53085	0.13443
	BLUE	wsnp_Ex_rep_c69752_68711460	3A	523556188	A/C	1.8829e-06	5.72517	-5.9634	0.14074
	BLUE	Tdurum_contig28699_54	3A	523557480	T/C	6.5851e-07	6.18144	6.50451	0.15369
	BLUE	Ex_c18484_2048	3A	525200865	A/C	6.0205e-07	6.22037	6.18072	0.15307
	BLUE	Ex_c18484_2026	3A	525200887	T/C	7.364e-07	6.13289	-6.1127	0.15087
	BLUE	AX-110568350	3A	526863833	A/G	7.2317e-07	6.14076	5.967	0.15061
	BLUE	wsnp_Ex_c763_1503467	3A	529773964	T/C	2.4947e-06	5.60298	-5.5799	0.13478
	BLUE	AX-108821223	3A	531666860	A/G	1.0663e-06	5.97212	-5.8283	0.1459
	BLUE	AX-158523070	3A	532323625	A/G	7.2565e-07	6.13927	-5.9587	0.15059
	BLUE	Tdurum_contig11121_834	3A	532448432	T/G	2.2463e-06	5.64853	5.57524	0.13524
	BLUE	Tdurum_contig11121_739	3A	532448988	A/G	1.252e-06	5.9024	-5.7396	0.14311
	BLUE	AX-109911948	3A	532595281	C/G	1.3895e-06	5.85714	5.70833	0.14154
	BLUE	wsnp_Ex_c2331_4369782	3A	533069937	T/C	1.8231e-06	5.73919	5.74716	0.1436
	BLUE	wsnp_Ra_c10669_17515792	3A	533073402	T/C	2.5742e-06	5.58936	-5.5453	0.13355
	BLUE	wsnp_Ex_rep_c66865_65263145	3A	533624456	A/G	3.7967e-07	6.42059	5.97222	0.15821
	BLUE	Ra_c72106_227	3A	533625910	T/C	5.9903e-07	6.22255	5.97539	0.15237
	BLUE	wsnp_Ex_c15269_23492289	3A	533660228	A/C	3.1835e-07	6.4971	-6.1175	0.16251
	BLUE	wsnp_Ex_c15269_23491104	3A	533662370	A/G	3.3854e-07	6.47039	-6.0666	0.16013
	BLUE	AX-94508109	3A	534179960	A/T	9.2621e-08	7.03329	7.00366	0.17712
	BLUE	AX-110054718	3A	534333680	T/C	2.0367e-07	6.69107	6.81295	0.16577
	BLUE	AX-158523672	3A	534548623	A/G	7.9378e-08	7.1003	7.23164	0.17962
	BLUE	RFL_Contig1175_354	3A	534989360	T/C	3.8628e-08	7.4131	-7.2165	0.18827
	BLUE	AX-158523405	3A	535003397	T/C	2.8174e-08	7.55015	-7.2914	0.19243
QGpc.ippg-3A.5	BLUE	GENE-4795_75	3A	556455904	T/C	3.9605e-07	6.40225	5.97937	0.15706
	BLUE	Excalibur_c46082_440	3A	556552544	T/C	6.5207e-07	6.18571	5.82907	0.15068
	BLUE	wsnp_Ex_c1149_2206471	3A	557257194	A/G	1.2927e-07	6.8885	6.55882	0.17258
	BLUE	wsnp_Ku_c3286_6111360	3A	557257573	A/G	8.0856e-08	7.09229	6.61065	0.17839
	BLUE	GENE-3343_183	3A	557259466	A/G	1.0783e-07	6.96726	6.5767	0.1775
	BLUE	BS00101401_51	3A	557414903	A/G	1.1116e-07	6.95405	6.60753	0.17498
	BLUE	Ku_c68484_1276	3A	557956333	A/G	1.2715e-07	6.89568	6.5163	0.17149
	BLUE	wsnp_Ku_c32404_42016343	3A	558886166	A/G	1.0436e-07	6.98147	6.58226	0.17482
	BLUE	wsnp_Ra_c11291_18338838	3A	559532756	T/C	5.693e-08	7.24466	-6.7309	0.18315
	BLUE	IAAV1334	3A	560679130	T/G	9.5641e-08	7.01936	6.60038	0.17516
	BLUE	wsnp_Ra_c35889_44345459	3A	560681451	T/C	5.719e-08	7.24268	-6.772	0.18407
	BLUE	Ku_c53625_627	3A	561118800	A/G	1.5877e-07	6.79923	-6.3042	0.16863
	BLUE	Kukri_c20889_526	3A	562194800	T/C	1.9664e-07	6.70633	-6.3306	0.16589
	BLUE	Ku_c14313_1194	3A	562284053	A/C	2.7036e-07	6.56806	-6.276	0.1628
	BLUE	wsnp_Ex_c47907_52974924	3A	562284480	T/C	1.9664e-07	6.70633	-6.3306	0.16589
	BLUE	BS00011612_51	3A	562351891	A/G	4.7155e-08	7.32647	-6.6806	0.1848
QGpc.ippg-5A.1	BLUE	TA006001-0725	5A	86167043	A/C	1.5768e-06	5.80222	5.87302	0.14003
	BLUE	Tdurum_contig81753_70	5A	86181419	A/G	1.3544e-06	5.86825	5.91791	0.14245
	BLUE	BobWhite_rep_c49176_485	5A	86181466	T/C	1.7972e-06	5.7454	-5.793	0.13844
	BLUE	Ex_c13534_401	5A	86873610	T/C	1.493e-06	5.82594	-5.8396	0.14115
	BLUE	BS00064387_51	5A	87404406	A/G	1.8804e-06	5.72575	5.84504	0.13789
	BLUE	wsnp_Ra_c17541_26430903	5A	88642966	T/C	1.816e-06	5.74088	-5.7949	0.13845
	BLUE	RFL_Contig4653_1217	5A	89705524	T/C	1.8495e-06	5.73295	5.85014	0.13893
	BLUE	IAAV5061	5A	91119649	T/C	1.4031e-06	5.85291	5.91509	0.14155
	BLUE	wsnp_Ra_c2228_4310870	5A	92183333	A/G	1.605e-06	5.79452	5.89734	0.13998
	BLUE	wsnp_JD_c8448_9444839	5A	92443719	T/C	1.6804e-06	5.77459	-5.8226	0.13965
QGpc.ippg-5A.2	BLUE	Ku_c69633_1873	5A	97227338	A/G	1.5848e-06	5.80003	5.87378	0.14005
	BLUE	wsnp_Ex_rep_c110023_92574403	5A	99019816	T/C	1.2966e-06	5.88719	5.92635	0.14269
	BLUE	wsnp_Ra_c10053_16636851	5A	99020163	T/C	1.3357e-06	5.87429	5.92118	0.14195
QGpc.ippg-5A.3	BLUE	AX-158585398	5A	104148104	A/G	2.6863e-06	5.57085	-5.6625	0.13337
	BLUE	wsnp_Ex_c130_259533	5A	104230856	T/C	1.6942e-06	5.77104	-5.8349	0.14011
	BLUE	wsnp_Ku_c328_679106	5A	104232239	T/C	1.3844e-06	5.85874	5.9181	0.14282
	BLUE	RAC875_rep_c114924_726	5A	104240537	A/G	1.6287e-06	5.78816	5.86666	0.14206
	BLUE	wsnp_Ex_c6117_10704945	5A	105704104	A/G	1.5072e-06	5.82183	-5.8345	0.14118
	BLUE	Ex_c5902_360	5A	107271324	A/C	1.7831e-06	5.74882	-5.8025	0.13948
	BLUE	RAC875_rep_c80358_120	5A	107893283	T/C	2.0257e-06	5.69342	-5.768	0.13777
	BLUE	wsnp_Ex_c18805_27686000	5A	107893308	A/G	1.382e-06	5.85949	5.91398	0.14213
	BLUE	wsnp_Ra_c14112_22155312	5A	109304708	A/G	1.6271e-06	5.78859	5.86918	0.14198
	BLUE	wsnp_Ra_c14112_22155451	5A	109304847	A/C	1.6219e-06	5.78998	5.85779	0.14109
	BLUE	wsnp_Ra_c18459_27525981	5A	109304959	T/C	1.9236e-06	5.71589	5.84042	0.13787
	BLUE	wsnp_Ex_c15084_23263641	5A	109342869	A/C	1.8995e-06	5.72136	-5.7769	0.13854
	BLUE	AX-109305182	5A	109943527	A/G	1.6067e-06	5.79407	5.86667	0.13946
QGpc.ippg-5B.1	BLUE	BS00024717_51	5B	58331978	T/C	8.2588e-07	6.08308	-5.8034	0.14958
	BLUE	RAC875_c62202_161	5B	58564024	T/C	9.3346e-07	6.0299	-5.6888	0.1466
	BLUE	Kukri_c51_98	5B	59158363	A/G	9.1385e-07	6.03913	5.66186	0.14655
	BLUE	wsnp_CAP7_c3665_1701376	5B	59159906	A/G	9.731e-07	6.01184	5.64115	0.14565
	BLUE	AX-94606697	5B	59162704	T/C	8.2714e-07	6.08242	-5.708	0.14769
QGpc.ippg-5B.2	BLUE	BS00068100_51	5B	427270412	A/G	5.5741e-07	6.25383	6.38254	0.15302
	BLUE	AX-158599792	5B	427331107	A/G	5.8106e-07	6.23578	6.37091	0.15222
	BLUE	Kukri_rep_c80794_53	5B	427929484	A/G	6.9788e-07	6.15622	-6.3998	0.15018
	BLUE	Kukri_c11240_332	5B	428125816	A/G	7.5026e-07	6.12479	-6.3768	0.14891
	BLUE	AX-109913298	5B	428126676	T/C	7.4467e-07	6.12804	-6.3807	0.14909
QGpc.ippg-5D	BLUE	AX-158587411	5D	552485680	T/C	1.1482e-06	5.93998	6.46487	0.14774
	BLUE	BS00068331_51	5D	552697675	T/C	2.3735e-07	6.62461	6.94014	0.17331
	BLUE	Kukri_c15823_196	5D	552698006	T/C	1.0309e-08	7.98678	-8.5502	0.22853
	BLUE	AX-158559167	5D	554351728	A/C	1.9904e-06	5.70106	-5.7672	0.14369
QGpc.ippg-6A.1	BLUE	AX-158543245	6A	454638223	T/G	1.1095e-06	5.95487	6.61686	0.14401
	BLUE	Tdurum_contig78006_158	6A	454638884	A/G	1.101e-06	5.95821	-7.6646	0.1441
	BLUE	AX-95228827	6A	454655948	A/C	2.9436e-06	5.53112	6.32351	0.13208
QGpc.ippg-6A.2	BLUE	AX-109302235	6A	609375603	A/G	2.2004e-06	5.6575	-5.9887	0.13626
	BLUE	BS00040814_51	6A	610349011	A/G	1.1462e-06	5.94074	5.93504	0.14436
	BLUE	wsnp_Ex_c15708_24057812	6A	611296106	T/C	2.5679e-07	6.59042	6.6379	0.16262
	BLUE	IAAV8380	6A	611297147	A/G	2.6335e-07	6.57947	-6.6606	0.16224
	BLUE	AX-158527054	6A	611319949	T/C	1.4252e-06	5.84612	-6.1307	0.14099
	BLUE	wsnp_Ex_c1153_2213588	6A	611412574	T/C	1.7991e-07	6.74494	6.52608	0.16774
	BLUE	tplb0045l08_298	6A	611513531	T/C	3.5387e-07	6.45116	-6.4105	0.15862
	BLUE	RAC875_c49329_81	6A	611514394	T/C	2.5573e-07	6.59222	-6.5269	0.1634
QGpc.ippg-6B.1	BLUE	AX-109927753	6B	452414532	T/C	9.2651e-07	6.03315	-6.3781	0.14693
	BLUE	BS00103275_51	6B	453931704	A/G	2.2374e-06	5.65026	-6.1918	0.13536
	BLUE	AX-158552532	6B	454520393	A/G	2.6725e-07	6.57308	6.73534	0.16207
	BLUE	BS00049942_51	6B	455448926	A/G	6.3267e-07	6.19882	-6.2004	0.15135
QGpc.ippg-6B.2	BLUE	wsnp_Ku_c11870_19296142	6B	573324168	T/C	3.5533e-07	6.44937	6.30593	0.15844
	BLUE	AX-109345675	6B	574630790	A/G	2.3088e-06	5.63661	5.54794	0.13675
	BLUE	AX-158535318	6B	574631265	T/C	6.5888e-07	6.18119	-6.0388	0.15092
	BLUE	Excalibur_c22106_190	6B	574662794	T/G	2.808e-06	5.5516	-5.3833	0.1337
	BLUE	BobWhite_c22075_85	6B	575638278	T/C	5.9663e-07	6.22429	6.12973	0.15188
	BLUE	Tdurum_contig44173_572	6B	576040811	T/C	2.741e-06	5.56209	5.72104	0.13321
	BLUE	RAC875_rep_c85751_123	6B	576813242	A/G	1.8203e-06	5.73986	5.77877	0.13784
	BLUE	RAC875_rep_c85751_72	6B	576813340	A/G	1.9373e-06	5.7128	5.80655	0.1374
QGpc.ippg-7A	BLUE	Ra_c956_2318	7A	733362445	T/C	2.6157e-06	5.58241	5.79799	0.13367
	BLUE	BS00071736_51	7A	733367407	T/G	2.2565e-06	5.64656	5.84854	0.13537
	BLUE	AX-158589978	7A	733368552	T/C	1.7779e-06	5.75009	-6.0147	0.13867

## Sheet: Table-S8-QTLs+stable QTNs-TKW
Table S8. Quantitative trait loci (QTL) for thousand kernel weight (TKW) identified by GWAS analysis in a set of 179 old and modern bread wheat accessions from Bulgaria
QTL	Env	SNP	Chr	Position (bp)	Allele	p-value	-log10(p)	Effect	R2
QTkw.ippg-1A.1	BLUE	AX-109903200	1A	3379136	T/C	7.4317e-07	6.12891	1.57341	0.14141
	BLUE	wsnp_Ku_c1818_3557408	1A	3390299	T/C	8.8883e-07	6.05118	1.55932	0.13881
	BLUE	CAP12_c3074_192	1A	4063353	A/G	1.0848e-08	7.96465	-1.8219	0.19265
QTkw.ippg-1A.2	TKW-2017	Kukri_c8390_1102	1A	6323681	A/G	0.00417	4.61802	-5.0128	0.10749
Stable QTN within a LD block	BLUE	Kukri_c8390_1102	1A	6323681	A/G	1.2122e-07	6.91643	-2.3281	0.16375
	BLUE	Kukri_rep_c102231_265	1A	7181857	T/C	1.7194e-08	7.76462	1.81194	0.18936
	BLUE	wsnp_Ex_c2868_5293485	1A	7184772	A/G	5.8744e-08	7.23104	1.69838	0.17399
	BLUE	AX-94692394	1A	7186246	T/C	2.8567e-09	8.54414	1.92688	0.20942
Stable QTN not in a LD block	TKW-2017	AX-95160390	1A	594098165	C/G	2.0707e-05	4.68388	3.43696	0.11127
	BLUE	AX-95160390	1A	594098165	C/G	1.709e-07	6.76726	1.56488	0.16537
QTkw.ippg-1B.1	BLUE	AX-158521638	1B	15236422	T/C	2.6342e-06	5.57935	-1.7439	0.13959
	BLUE	BS00105846_51	1B	15284504	T/C	1.8509e-08	7.73262	-1.9928	0.18609
	BLUE	AX-158570866	1B	15368386	T/C	3.808e-08	7.4193	1.99099	0.1973
	BLUE	BS00108058_51	1B	15439302	T/C	1.2117e-07	6.9166	-1.7292	0.16267
	BLUE	BS00108057_51	1B	15439308	T/C	9.8522e-09	8.00647	-2.0176	0.21748
	BLUE	BS00089524_51	1B	15448174	A/C	4.7177e-07	6.32627	-1.6468	0.14664
	BLUE	AX-94602901	1B	15448428	T/C	8.5309e-08	7.06901	1.85373	0.16696
	BLUE	BS00011695_51	1B	15745280	A/G	4.7794e-08	7.32063	1.80061	0.175
	BLUE	AX-95245523	1B	15745730	A/G	1.6164e-08	7.79145	-1.8781	0.18882
	BLUE	AX-108893457	1B	15746263	A/G	4.5447e-08	7.34249	1.80289	0.17478
	BLUE	AX-95182696	1B	15748142	A/C	4.8911e-08	7.31059	1.79794	0.17462
QTkw.ippg-1B.2	BLUE	Kukri_c18109_331	1B	636263282	T/C	3.3727e-07	6.47202	2.43595	0.1503
Stable QTN within a LD block	TKW-2021	BS00039135_51	1B	636753103	T/C	0.00349	4.07189	-3.9531	0.08572
	BLUE	BS00039135_51	1B	636753103	A/C	6.7022e-08	7.17378	-2.0006	0.17024
Stable QTN within a LD block	TKW-2021	BobWhite_c2844_569	1B	636753126	A/C	7.6062e-05	4.11883	-3.9792	0.08477
	BLUE	BobWhite_c2844_569	1B	636753126	A/C	7.0193e-08	7.15371	-1.9957	0.16999
Stable QTN within a LD block	TKW-2021	AX-111478328	1B	636800748	A/G	6.4249e-05	4.19213	-4.021	0.08654
	BLUE	AX-111478328	1B	636800748	A/G	7.2383e-08	7.14036	-1.993	0.16905
QTkw.ippg-2B.1	BLUE	AX-158597300	2B	13811790	T/C	2.0514e-07	6.68795	2.17882	0.15629
	BLUE	BobWhite_c26803_89	2B	14047040	T/C	1.7876e-07	6.74773	-2.1923	0.15916
	BLUE	AX-158575019	2B	15207265	T/G	8.1083e-07	6.09107	-2.0067	0.13983
QTkw.ippg-2B.2	BLUE	AX-158541093	2B	28367423	T/C	1.5808e-06	5.80112	-1.9769	0.13227
	BLUE	wsnp_Ku_c48_103915	2B	29032619	T/C	1.5385e-06	5.8129	1.98225	0.13226
	BLUE	wsnp_Ex_c1629_3104356	2B	29038467	T/C	1.8692e-06	5.72834	1.98735	0.13008
	BLUE	wsnp_Ex_c1602_3055066	2B	29039762	T/G	1.0461e-06	5.98043	-2.0051	0.13693
	BLUE	Kukri_c74521_181	2B	29555431	A/G	9.6984e-07	6.0133	-2.0165	0.13784
	BLUE	AX-158557664	2B	29867947	T/C	2.3637e-06	5.62641	-1.845	0.12729
	BLUE	AX-111020457	2B	29978146	A/G	1.4642e-06	5.8344	1.99933	0.13293
	BLUE	BS00100939_51	2B	29991128	T/C	1.3586e-06	5.86691	2.00384	0.13392
	BLUE	Excalibur_c46590_363	2B	29993256	T/C	5.1376e-07	6.28924	-2.1327	0.15342
Stable QTN not in a LD block	TKW-2017	Excalibur_rep_c66832_742	2B	101302767	T/G	2.0656e-06	5.68495	4.0961	0.13498
	BLUE	Excalibur_rep_c66832_742	2B	101302767	T/G	3.1735e-05	4.49846	1.28157	0.09745
Stable QTN not in a LD block	TKW-2017	RFL_Contig2231_346	2B	104574431	A/G	1.7041e-05	4.7685	4.63791	0.10948
	BLUE	RFL_Contig2231_346	2B	104574431	A/G	2.6806e-06	5.57177	1.94329	0.12576
Stable QTN not in a LD block	TKW-2017	Tdurum_contig68806_677	2B	104577618	T/C	2.3893e-05	4.62173	-4.528	0.10692
	BLUE	Tdurum_contig68806_677	2B	104577618	T/C	1.826e-06	5.7385	-1.954	0.13108
QTkw.ippg-2B.3	BLUE	wsnp_JD_c1236_1789566	2B	177649403	A/G	2.8879e-06	5.53942	-1.54	0.12502
	BLUE	wsnp_Ex_c51461_55394646	2B	177650005	A/G	1.3273e-06	5.87703	-1.6248	0.134
	BLUE	AX-109345140	2B	178703753	A/C	2.9269e-06	5.53359	-1.5385	0.12474
QTkw.ippg-2B.4	BLUE	AX-95652816	2B	640489948	A/G	2.1222e-07	6.67321	-2.4595	0.15588
	BLUE	wsnp_JD_c52_87219	2B	640689092	A/G	6.2036e-07	6.20736	2.01997	0.14308
	BLUE	BS00069685_51	2B	640794784	T/C	1.4927e-06	5.82603	2.09469	0.13262
	BLUE	Kukri_c40621_513	2B	641102175	A/G	4.6772e-07	6.33001	-2.3116	0.14638
	BLUE	Excalibur_c11392_1193	2B	641943160	A/G	1.1902e-06	5.92438	1.9126	0.13534
	BLUE	AX-110475299	2B	641945492	T/C	5.9933e-07	6.22233	-2.0196	0.1436
	BLUE	AX-158573682	2B	643356333	A/C	1.2759e-06	5.89418	-2.2955	0.13447
	BLUE	Kukri_c9785_62	2B	643682948	A/G	5.8728e-07	6.23115	-2.2249	0.14366
	BLUE	Kukri_c9785_1472	2B	643684558	A/G	4.8246e-07	6.31654	-2.2581	0.14601
	BLUE	wsnp_Ex_c9729_16071358	2B	643685134	A/G	1.023e-06	5.99012	1.93858	0.13726
	BLUE	AX-110919945	2B	643685337	A/G	4.1305e-07	6.384	2.2494	0.14794
	BLUE	Excalibur_c73922_109	2B	644147002	T/C	6.2024e-07	6.20744	2.18752	0.14308
	BLUE	Excalibur_c73922_55	2B	644147009	A/G	4.9996e-07	6.30106	-2.2616	0.14582
	BLUE	Kukri_c1460_1032	2B	644151531	A/G	7.2452e-07	6.13995	2.21519	0.14116
	BLUE	AX-158547163	2B	644155869	T/C	6.6623e-07	6.17638	-2.2681	0.14216
	BLUE	IAAV5675	2B	645309843	A/G	2.6649e-07	6.57432	-2.2781	0.15336
QTkw.ippg-2B.5	BLUE	Excalibur_c5438_274	2B	774958075	T/C	3.963e-09	8.40198	2.04279	0.20598
	BLUE	Excalibur_c7971_1573	2B	775371411	A/G	7.0877e-09	8.14949	-2.1097	0.19788
	BLUE	BobWhite_c10520_1517	2B	775371469	A/G	4.4153e-07	6.35504	2.32842	0.16431
	BLUE	AX-94702510	2B	776211899	A/C	2.1167e-07	6.67434	-1.7933	0.15652
	BLUE	AX-158536950	2B	776212162	A/C	7.2445e-08	7.13999	1.98771	0.16997
	BLUE	AX-158573942	2B	777308028	T/G	2.2501e-07	6.6478	-1.5815	0.15651
	BLUE	RAC875_c19685_944	2B	777330224	T/C	5.411e-07	6.26672	1.5166	0.14662
QTkw.ippg-2B.6	BLUE	Kukri_c49784_86	2B	800031380	A/G	5.1871e-07	6.28508	-1.6423	0.14521
	BLUE	Kukri_c49784_56	2B	800031410	A/G	1.5939e-06	5.79754	1.54049	0.1323
	BLUE	Excalibur_rep_c106698_235	2B	801217330	A/G	1.1174e-06	5.95179	-1.6962	0.13617
	BLUE	BS00065264_51	2B	801253577	T/G	2.3727e-07	6.62476	-1.5825	0.15513
QTkw.ippg-3A	BLUE	RAC875_rep_c109701_76	3A	47825575	T/C	5.938e-07	6.22636	-1.6023	0.14368
	BLUE	BS00011111_51	3A	49480820	T/G	2.018e-07	6.69508	-1.7298	0.15662
	BLUE	IAAV1405	3A	49481237	A/C	5.0741e-07	6.29464	1.7644	0.14744
QTkw.ippg-3B.1	BLUE	Tdurum_contig14251_431	3B	6754335	T/C	2.293e-06	5.6396	-1.8908	0.12764
	BLUE	BobWhite_c7454_492	3B	6754382	A/G	1.8776e-06	5.7264	1.93694	0.13075
	BLUE	wsnp_Ex_rep_c67625_66279491	3B	8340715	T/C	1.5516e-06	5.80922	1.94635	0.13231
	BLUE	AX-94783816	3B	8529230	A/T	1.1639e-06	5.93408	-1.8448	0.15656
	BLUE	AX-94754126	3B	10301857	T/C	2.876e-06	5.54121	-1.453	0.12507
	BLUE	AX-94809409	3B	11603191	A/G	1.6385e-06	5.78555	2.01044	0.13159
QTkw.ippg-3B.2	BLUE	AX-111509127	3B	59855402	A/G	4.7883e-07	6.31982	-1.5452	0.14722
	BLUE	BS00079014_51	3B	60142147	A/G	3.0274e-07	6.51893	1.759	0.15267
	BLUE	wsnp_Ex_c2820_5215394	3B	60254934	T/C	2.575e-06	5.58922	-1.4456	0.12694
	BLUE	RAC875_c34484_67	3B	60743267	A/G	2.1232e-07	6.67301	-1.7249	0.15606
	BLUE	wsnp_Ku_c33335_42844594	3B	60868389	A/G	9.6658e-07	6.01476	-1.5153	0.14216
QTkw.ippg-3B.3	BLUE	BS00025114_51	3B	82072407	T/C	2.1376e-06	5.67007	-1.4153	0.12929
	BLUE	wsnp_Ex_c1097_2105209	3B	82447575	A/G	9.3801e-07	6.02779	1.47085	0.13999
	BLUE	Kukri_c16742_415	3B	82635581	T/C	2.1837e-06	5.66081	1.41156	0.12887
	BLUE	AX-158579297	3B	83431280	T/C	2.0685e-06	5.68434	1.41646	0.12966
QTkw.ippg-3B.4	BLUE	AX-158562984	3B	244775554	A/G	1.1513e-06	5.93881	-1.8885	0.13568
	BLUE	CAP8_rep_c4453_136	3B	244985303	T/C	1.1513e-06	5.93881	1.88853	0.13568
	BLUE	Excalibur_c24830_415	3B	244990706	A/G	2.4766e-06	5.60614	-1.8465	0.12824
	BLUE	Excalibur_c48841_1380	3B	244990809	T/C	1.1513e-06	5.93881	1.88853	0.13568
QTkw.ippg-3B.5	BLUE	IACX3190	3B	543842604	T/C	1.3944e-06	5.85561	1.50938	0.13342
	BLUE	BS00062734_51	3B	545069023	A/G	4.21e-07	6.37572	-1.5302	0.14764
	BLUE	AX-158548748	3B	547339726	A/G	1.2498e-06	5.90316	-1.5889	0.13487
	BLUE	AX-89363868	3B	548046409	A/G	4.5816e-07	6.33898	1.50681	0.14663
QTkw.ippg-4B	BLUE	AX-95658048	4B	588433698	A/G	2.011e-06	5.69659	-1.5775	0.13002
	BLUE	Ex_c25467_851	4B	588433721	T/C	8.5557e-07	6.06774	1.62253	0.13919
	BLUE	AX-112289571	4B	588436507	T/C	1.3146e-06	5.88121	1.59642	0.13411
	BLUE	Ex_c9296_605	4B	589178223	T/C	2.0818e-06	5.68156	-1.5729	0.13184
	BLUE	Ra_c10455_3226	4B	590442063	T/C	1.6363e-06	5.78614	1.52522	0.13159
	BLUE	RAC875_c1828_1130	4B	590854566	T/C	1.678e-06	5.77521	-1.5869	0.13195
QTkw.ippg-5A.1	BLUE	AX-158584685	5A	482947085	A/G	6.5347e-07	6.18477	-1.9426	0.14246
	BLUE	AX-110979758	5A	484075236	T/C	6.9628e-07	6.15722	1.92797	0.1417
	BLUE	IACX8002	5A	485201217	T/C	8.3301e-07	6.07935	-1.8667	0.13963
	BLUE	AX-158584689	5A	485600480	T/C	2.2248e-06	5.65271	1.79289	0.12868
QTkw.ippg-5A.2	BLUE	AX-109335926	5A	669202772	T/G	1.4776e-07	6.83044	-1.9494	0.16079
	BLUE	AX-94504714	5A	669584446	T/C	2.615e-07	6.58253	1.8776	0.15352
	BLUE	AX-110937882	5A	670236095	A/G	2.3226e-07	6.63403	1.88963	0.15494
	BLUE	AX-94683710	5A	670253195	A/G	1.8796e-07	6.72593	2.01895	0.15775
	BLUE	BS00082219_51	5A	670346276	T/C	1.1107e-06	5.9544	1.78416	0.13681
	BLUE	AX-158565154	5A	670445240	A/G	1.4379e-06	5.84227	-1.7308	0.13313
QTkw.ippg-5B.1	BLUE	Excalibur_c6967_553	5B	8910615	A/G	8.9255e-07	6.04937	-1.9763	0.14025
	BLUE	RFL_Contig4979_965	5B	8918235	T/C	9.0628e-07	6.04274	-1.9771	0.13902
	BLUE	RFL_Contig4979_865	5B	8918288	T/C	8.1112e-07	6.09091	-1.9838	0.13982
	BLUE	BS00067985_51	5B	8945985	T/C	7.5114e-07	6.12428	2.03129	0.14275
QTkw.ippg-5B.2	BLUE	AX-158525835	5B	559771793	A/G	4.6145e-07	6.33588	1.50037	0.14654
	BLUE	Tdurum_contig12995_792	5B	559771967	T/C	4.6145e-07	6.33588	1.50037	0.14654
	BLUE	Tdurum_contig12995_722	5B	559772191	T/C	4.5513e-07	6.34186	1.50226	0.14677
	BLUE	AX-110484654	5B	559996756	A/G	3.5421e-07	6.45074	1.55285	0.15069
	BLUE	AX-110479481	5B	560438722	T/G	1.1043e-06	5.95691	-1.4851	0.13643
QTkw.ippg-5B.3	BLUE	AX-111109389	5B	672440792	T/C	2.5563e-07	6.59239	-1.7089	0.15537
	BLUE	CAP12_c2231_114	5B	672594667	A/C	1.4335e-07	6.8436	1.70512	0.16076
	TKW-2021	IAAV5014	5B	672594691	A/G	9.4537e-05	4.0244	3.71979	0.08235
	BLUE	BS00039874_51	5B	672953321	A/G	4.0422e-07	6.39338	1.61315	0.14841
QTkw.ippg-5B.4	BLUE	AX-111117071	5B	692633079	T/C	6.1541e-07	6.21084	-1.6821	0.14403
	BLUE	Kukri_c1214_825	5B	692634205	T/C	1.948e-07	6.71041	-1.8741	0.15691
	BLUE	Kukri_c1214_2316	5B	692635809	T/C	1.7647e-07	6.75333	-1.8869	0.15811
QTkw.ippg-6A.1	BLUE	Excalibur_c20597_509	6A	6725144	A/G	2.5538e-07	6.59281	1.6219	0.1545
	BLUE	RFL_Contig5170_330	6A	6728227	A/G	2.5483e-07	6.59375	1.59816	0.15374
	BLUE	AX-109286123	6A	6731113	A/G	2.2915e-07	6.63988	1.60795	0.15503
	BLUE	Tdurum_contig63703_1143	6A	6733470	T/C	1.7836e-07	6.7487	1.65746	0.16058
QTkw.ippg-6A.2	BLUE	Excalibur_rep_c107577_250	6A	15767429	A/G	2.5419e-06	5.59484	1.43412	0.12729
Stable QTN within a LD block	TKW-2017	RAC875_c2253_2011	6A	16566150	T/C	1.1453e-05	4.94108	-3.5	0.11494
	BLUE	RAC875_c2253_2011	6A	16566150	T/C	1.0277e-06	5.98813	-1.4893	0.1391
	BLUE	wsnp_Ku_c10377_17180909	6A	16570355	T/C	1.8895e-06	5.72365	2.11531	0.12985
Stable QTN within a LD block	TKW-2017	Kukri_c10377_376	6A	16570608	A/G	1.7628e-05	4.7538	-3.4009	0.10913
	BLUE	Kukri_c10377_376	6A	16570608	A/G	1.8004e-06	5.74463	-1.4482	0.13048
QTkw.ippg-6A.3	BLUE	Tdurum_contig25841_178	6A	29212089	T/C	1.9278e-07	6.71494	-1.9568	0.15826
	BLUE	AX-158623960	6A	29229663	A/G	1.8258e-07	6.73855	-1.9666	0.15777
	BLUE	Kukri_c264_438	6A	29558048	A/G	2.804e-07	6.55222	1.9055	0.15259
	BLUE	Excalibur_c1708_1975	6A	29559318	A/G	1.8399e-07	6.73521	-1.9665	0.15776
	BLUE	Tdurum_contig42015_2187	6A	29559695	T/G	2.1294e-07	6.67174	-1.9459	0.15593
	BLUE	IAAV4117	6A	29610252	T/C	2.2984e-07	6.63857	1.94686	0.15583
	BLUE	AX-158527615	6A	29614497	T/C	2.1167e-07	6.67434	-1.9459	0.15591
	BLUE	BS00066661_51	6A	29967284	A/G	1.8511e-07	6.73257	-1.9729	0.1577
	BLUE	IACX8337	6A	30030924	A/G	2.1322e-07	6.67117	-1.9459	0.15591
	BLUE	Tdurum_contig64407_187	6A	30190310	A/G	2.2344e-07	6.65084	-1.9505	0.15586
	BLUE	Tdurum_contig64407_297	6A	30190396	A/G	2.1167e-07	6.67434	-1.9459	0.15591
	BLUE	Tdurum_contig25770_308	6A	30464377	A/G	3.0011e-07	6.52272	1.89569	0.1517
	BLUE	RAC875_c1215_1525	6A	30467090	T/C	1.5153e-07	6.8195	-1.9883	0.16003
	BLUE	RAC875_rep_c106439_1097	6A	30467785	T/C	1.7921e-07	6.74664	-1.9735	0.1585
	BLUE	Kukri_c9080_257	6A	31370822	T/C	3.0801e-07	6.51144	1.89898	0.15148
	BLUE	Tdurum_contig61934_60	6A	31383015	A/G	3.0036e-07	6.52236	1.89609	0.15186
	BLUE	BobWhite_c10740_179	6A	32658102	T/C	5.1725e-08	7.2863	-2.2261	0.17759
	BLUE	Tdurum_contig42906_732	6A	32658962	A/C	6.0991e-08	7.21473	-2.1798	0.17129
	BLUE	Tdurum_contig9544_978	6A	32660608	T/C	7.3497e-08	7.13373	2.15466	0.16889
	BLUE	wsnp_Ex_rep_c67468_66068960	6A	32660841	T/C	1.0245e-07	6.98949	2.10481	0.16491
	BLUE	Tdurum_contig9544_2233	6A	32662434	A/G	6.0293e-08	7.21973	-2.1712	0.17134
	BLUE	Tdurum_contig33286_221	6A	32743859	T/C	5.1899e-08	7.28484	2.17724	0.18474
	BLUE	BS00023140_51	6A	32793302	T/C	2.383e-08	7.62288	-2.2023	0.18268
	BLUE	BS00076530_51	6A	32794703	T/C	2.4226e-08	7.61572	-2.2104	0.1827
	BLUE	AX-109840501	6A	33001139	T/C	3.6516e-08	7.43752	2.14103	0.17739
	BLUE	AX-109900296	6A	33584630	T/C	5.2878e-08	7.27672	-2.1331	0.17282
	BLUE	Kukri_c35661_63	6A	33954693	T/C	7.4212e-08	7.12953	2.084	0.16875
	BLUE	IAAV7418	6A	33957213	T/C	7.9742e-08	7.09831	2.0734	0.16778
	BLUE	RFL_Contig4939_885	6A	34303140	A/G	7.3704e-08	7.13251	2.08357	0.16875
	BLUE	AX-158527717	6A	34677937	T/C	7.0533e-08	7.15161	2.09605	0.16952
	BLUE	Tdurum_contig102404_127	6A	34972843	A/G	5.3009e-08	7.27565	-2.1337	0.1729
	BLUE	TA003021-1057	6A	34974669	A/G	2.962e-07	6.52841	2.43552	0.17804
	BLUE	TA005058-0493	6A	34981818	T/C	5.3311e-08	7.27318	-2.1333	0.17281
	BLUE	RAC875_c34617_143	6A	34982335	A/G	5.377e-08	7.26946	-2.1343	0.17272
	BLUE	AX-94419507	6A	35633625	A/C	3.6453e-07	6.43827	-2.2683	0.14936
	BLUE	Tdurum_contig42729_433	6A	35637026	T/C	5.3372e-07	6.27269	2.21173	0.14489
	BLUE	Tdurum_contig42729_380	6A	35637126	T/C	3.6453e-07	6.43827	-2.2683	0.14936
	BLUE	IACX3415	6A	36686429	T/C	5.344e-07	6.27213	-2.1998	0.14479
Stable QTN not in a LD block	TKW-2017	RAC875_rep_c114561_587	6A	77532890	A/G	1.5598e-06	5.80693	4.24455	0.13867
	TKW-2021	RAC875_rep_c114561_587	6A	77532890	A/G	2.0632e-05	4.68546	3.81512	0.09926
	BLUE	RAC875_rep_c114561_587	6A	77532890	A/G	1.9504e-06	5.70988	1.55661	0.13035
Stable QTN not in a LD block	TKW-2017	AX-95145282	6A	100766008	A/G	1.4435e-08	7.84058	4.7803	0.19961
	BLUE	AX-95145282	6A	100766008	A/G	6.3376e-06	5.19808	1.37108	0.11694
Stable QTN not in a LD block	TKW-2017	AX-158588216	6A	100804152	A/G	2.2353e-06	5.65066	4.08961	0.13441
	BLUE	AX-158588216	6A	100804152	A/G	2.7016e-05	4.56838	1.30335	0.09944
QTkw.ippg-6A.4	BLUE	RFL_Contig5314_1147	6A	584944829	T/C	1.1671e-06	5.93289	1.46026	0.13698
	BLUE	AX-158600354	6A	584950981	T/C	9.566e-07	6.01927	1.47509	0.13901
	BLUE	AX-158566154	6A	585068492	A/G	1.9746e-06	5.70452	1.43105	0.1306
	BLUE	AX-158527039	6A	585199159	A/G	5.4597e-07	6.26283	1.75425	0.14473
	BLUE	AX-94475556	6A	586102229	T/C	7.7764e-08	7.10922	-1.8371	0.16842
QTkw.ippg-6A.5	BLUE	Ex_c31468_598	6A	609426471	A/G	4.0332e-08	7.39435	1.73472	0.17931
	BLUE	wsnp_JD_c2198_3021879	6A	609449359	A/G	1.0119e-07	6.99486	1.67397	0.16585
	BLUE	wsnp_Ex_c62371_62036044	6A	609453768	A/G	3.4899e-08	7.45719	-1.7349	0.17806
	BLUE	Excalibur_c15309_646	6A	610311157	A/C	3.0819e-08	7.51118	-1.7265	0.17959
	BLUE	RAC875_c12542_1857	6A	610800922	T/C	3.577e-08	7.44648	1.76917	0.17776
	BLUE	Excalibur_c21688_724	6A	611485959	A/G	8.3374e-09	8.07897	1.98179	0.19684
	BLUE	D_contig26362_1277	6A	611486383	T/C	7.8722e-09	8.1039	2.0219	0.19897
	BLUE	wsnp_Ex_c4480_8055475	6A	611487043	A/G	9.9705e-09	8.00128	1.96992	0.19376
	BLUE	wsnp_Ex_c4480_8056013	6A	611487998	T/C	1.7393e-09	8.75963	-2.0837	0.21578
	BLUE	Kukri_c11902_580	6A	611491408	T/C	1.7263e-09	8.76288	-2.0853	0.21602
	BLUE	RAC875_c3928_422	6A	611858446	T/C	4.5024e-09	8.34656	-2.0194	0.20485
Stable QTN not in a LD block	TKW-2017	GENE-3659_104	6B	159699808	T/C	1.4465e-06	5.83968	-4.2447	0.13936
	BLUE	GENE-3659_104	6B	159699808	T/C	3.078e-05	4.51173	-1.3122	0.09779
QTkw.ippg-6B.1	BLUE	Ra_c26497_381	6B	288418660	T/C	2.7779e-06	5.55628	1.47441	0.12561
	BLUE	Kukri_c26279_503	6B	288786006	T/C	1.9524e-06	5.70943	-1.4974	0.12978
	BLUE	wsnp_Ex_c14586_22625563	6B	288795022	A/G	2.4362e-06	5.61329	-1.4888	0.12734
	BLUE	BS00063631_51	6B	289686179	T/C	2.7779e-06	5.55628	1.47441	0.12561
QTkw.ippg-6B.2	BLUE	Kukri_c2800_103	6B	309748820	T/C	2.6726e-06	5.57307	1.47255	0.12611
	BLUE	RAC875_c41604_1001	6B	309775134	T/C	1.7724e-06	5.75144	-1.5441	0.13102
	BLUE	wsnp_Ex_c8267_13954978	6B	309782899	T/C	2.0534e-06	5.68753	-1.5247	0.12909
	BLUE	BS00069368_51	6B	311204877	A/G	2.614e-06	5.58269	1.48491	0.12685
QTkw.ippg-6B.3	BLUE	wsnp_Ex_c1398_2677127	6B	417231132	A/G	2.3811e-06	5.62322	-1.5121	0.12714
	BLUE	RAC875_c90029_92	6B	418319995	T/C	2.4201e-06	5.61617	-1.5245	0.12785
	BLUE	Kukri_c55096_140	6B	419771793	A/C	2.0439e-06	5.68954	1.49408	0.12948
QTkw.ippg-6B.4	BLUE	Excalibur_c8134_1319	6B	705284589	T/G	3.8008e-08	7.42012	1.74495	0.17858
	BLUE	Ex_c31468_763	6B	705315053	A/G	7.1847e-08	7.14359	-1.6935	0.17002
	BLUE	wsnp_Ex_rep_c67100_65576598	6B	705383910	A/G	3.1413e-08	7.50289	-1.7461	0.17935
QTkw.ippg-6D	BLUE	wsnp_Ex_c4942_8793029	6D	462537013	A/G	1.2734e-07	6.89504	1.65484	0.16216
	BLUE	RAC875_c3156_630	6D	462604752	T/C	1.3431e-07	6.87189	1.64904	0.16142
	BLUE	RAC875_rep_c103556_427	6D	462604888	A/C	4.9928e-08	7.30166	-1.7117	0.17366
	BLUE	Kukri_rep_c107975_95	6D	462605069	A/G	1.3431e-07	6.87189	1.64904	0.16142
	BLUE	Excalibur_c29102_933	6D	462605847	A/G	1.3198e-07	6.87949	1.6533	0.16189
	BLUE	Kukri_c13912_1543	6D	462630016	T/A	1.5925e-08	7.79792	-1.7996	0.18979
	BLUE	IAAV6637	6D	462632061	A/C	2.2268e-08	7.65232	-1.7695	0.18482
	BLUE	CAP8_c6799_93	6D	462632115	T/C	1.2734e-07	6.89504	1.65484	0.16216
	BLUE	AX-108829263	6D	462705134	A/G	1.3978e-07	6.85455	1.64813	0.16107
	BLUE	Kukri_c38025_633	6D	462840299	A/G	1.7183e-08	7.7649	2.00025	0.18796
	BLUE	wsnp_Ex_c946_1813956	6D	463068701	A/C	6.9427e-08	7.15847	1.70392	0.17242
	BLUE	Ex_c12134_939	6D	463224127	T/G	1.3263e-07	6.87736	1.65405	0.1618
	BLUE	Ex_c12134_1160	6D	463224348	T/G	2.5887e-08	7.58692	1.76842	0.18313
	BLUE	wsnp_Ex_c10910_17729008	6D	463447084	A/G	1.2734e-07	6.89504	1.65484	0.16216
	BLUE	RAC875_c14354_934	6D	463715376	T/C	1.4395e-07	6.84179	1.63892	0.16139
	BLUE	AX-158536176	6D	463719665	A/G	1.7281e-07	6.76243	1.62308	0.15913
	BLUE	D_contig10996_530	6D	463743278	A/G	1.8787e-07	6.72614	1.61674	0.15735
	BLUE	AX-158530919	6D	464010753	A/G	3.619e-08	7.44141	1.77071	0.17771
	BLUE	AX-110501405	6D	464496448	C/G	9.7941e-09	8.00904	1.8701	0.19671
	BLUE	AX-95181312	6D	464649488	A/G	9.74e-09	8.01144	1.86039	0.19519
	BLUE	AX-158530940	6D	464694288	T/C	3.5352e-08	7.45159	1.78217	0.17779
	BLUE	wsnp_Ex_c13188_20825019	6D	464719735	A/G	8.9374e-09	8.04879	-1.8966	0.20516
	BLUE	AX-158530753	6D	464729920	T/C	3.5352e-08	7.45159	1.78217	0.17779
	BLUE	AX-158530750	6D	464739680	T/C	5.0972e-09	8.29267	-1.8958	0.20218
	BLUE	AX-94533650	6D	464749330	A/G	9.6028e-09	8.0176	1.96973	0.19405
	BLUE	wsnp_Ex_c4480_8056354	6D	464946552	T/C	2.1253e-09	8.67258	-2.0778	0.21428
	BLUE	AX-158600736	6D	464948739	T/C	2.0038e-09	8.69815	-2.0784	0.21523
	BLUE	BobWhite_c18136_441	6D	464985677	T/C	2.6239e-08	7.58105	1.86255	0.18175
	BLUE	D_contig13913_154	6D	465041443	A/G	5.1584e-09	8.28748	2.02606	0.20577
	BLUE	TA005561-0543	6D	465050368	T/C	3.3342e-09	8.47701	-2.0647	0.21134
	BLUE	AX-158530739	6D	465072596	A/G	4.5922e-09	8.33798	-2.0178	0.20426
	BLUE	TA003097-1351	6D	465100051	T/C	5.0346e-09	8.29804	-2.0275	0.20585
	BLUE	wsnp_Ku_c1765_3452586	6D	465207141	T/C	9.4232e-09	8.0258	1.9758	0.19441
	BLUE	RAC875_rep_c112449_669	6D	465209385	T/C	5.2362e-09	8.28098	-2.0327	0.2019
	BLUE	BS00087343_51	6D	465210215	A/G	1.9296e-08	7.71453	1.91674	0.18542
	BLUE	Kukri_s109823_59	6D	465210338	T/C	4.9529e-09	8.30514	-2.0119	0.20242
	BLUE	AX-111474186	6D	465420324	T/G	1.9625e-08	7.70719	1.91101	0.1851
	BLUE	BS00080047_51	6D	465743657	T/C	3.1035e-08	7.50815	1.90957	0.18285
	BLUE	BS00105877_51	6D	465957252	A/G	2.9209e-08	7.53448	1.90103	0.18032
	BLUE	BS00105522_51	6D	465959613	A/C	2.8147e-08	7.55057	1.90097	0.18061
	BLUE	IAAV64	6D	466550181	A/G	4.296e-08	7.36694	-0.073511	0.17538
QTkw.ippg-7A	BLUE	AX-94791713	7A	19006326	T/C	1.6008e-06	5.79566	1.51813	0.13284
	BLUE	Kukri_c1831_1243	7A	19006783	T/C	2.7127e-06	5.5666	1.47493	0.12562
	BLUE	Tdurum_contig13048_89	7A	19420697	A/G	2.6567e-06	5.57566	-1.4959	0.12682
	BLUE	TA001002-0479	7A	19420789	A/C	1.8628e-06	5.72983	1.50657	0.13015
	BLUE	AX-158539556	7A	19933982	A/C	1.7388e-06	5.75975	1.5104	0.13191
	BLUE	BS00082180_51	7A	19969593	T/G	1.7924e-06	5.74657	1.51088	0.13075
	BLUE	CAP11_c1661_59	7A	20164052	T/C	2.1137e-06	5.67496	1.49326	0.12862
	BLUE	RAC875_c17185_90	7A	20164436	A/C	1.947e-06	5.71063	1.49861	0.12958
	BLUE	Tdurum_contig54860_525	7A	20171167	A/G	1.9193e-06	5.71686	1.4973	0.12967
QTkw.ippg-7B	BLUE	AX-158592227	7B	648149142	T/C	2.5961e-06	5.58568	1.72515	0.12613
	BLUE	AX-158567562	7B	648442110	T/C	6.953e-07	6.15783	-1.809	0.14175
	BLUE	AX-94726653	7B	648648924	A/G	6.4172e-07	6.19265	1.79997	0.14261
	BLUE	AX-158592228	7B	648905738	A/G	2.9739e-07	6.52667	1.83264	0.15361
	BLUE	AX-158592437	7B	649405079	A/G	1.7723e-07	6.75146	1.73076	0.15831
	BLUE	AX-95130016	7B	650126723	T/C	9.4382e-07	6.02511	-1.6758	0.13803
	BLUE	BobWhite_c8890_279	7B	650130675	A/C	9.4875e-07	6.02285	-1.6761	0.13803
	BLUE	RAC875_c45062_305	7B	650539478	A/G	4.91e-07	6.30892	-1.78	0.1459

## Sheet: Table-S9-Candidate genes-GPC
Table S9. Candidate genes inside QTL for grain protein content (GPC)
QTL/Gene ID	Chr	Position including LD support intervals (bp)	Length (bp)	Gene/TE	GO Ontology	Function decription	Annotation/interpros/uniprots
QGpc.ippg-1A.1
TraesCS1A01G050100	1A	32 084 707 .. 32 089 178 (+)	4471	G	MF: zinc ion binding; MF: oxidoreductase activity; BP: oxidation-reduction process	Alcohol dehydrogenase, putative	Alcohol dehydrogenase, zinc-type, conserved site; GroES-like; Alcohol dehydrogenase, C-terminal; Alcohol dehydrogenase, N-terminal; NAD(P)-binding domain; Polyketide synthase, enoylreductase domain
TraesCS1A01G050200	1A	32 111 053 .. 32 112 972 (+)	1919	G	MF: catalytic activity; BP: cellular amino acid metabolic process; MF: carboxy-lyase activity; BP: carboxylic acid metabolic process; MF: pyridoxal phosphate binding	Tryptophan decarboxylase	Pyridoxal phosphate-dependent decarboxylase; Aromatic-L-amino-acid decarboxylase; Pyridoxal phosphate-dependent transferase, major region, subdomain 1; Pyridoxal phosphate-dependent transferase, subdomain 2; Pyridoxal phosphate-dependent transferase; Pyridoxal-phosphate binding site
TraesCS1A01G050300	1A	32 186 072 .. 32 187 086 (+)	1014	G		Pentatricopeptide repeat-containing protein	Pentatricopeptide repeat
TraesCS1A01G050400	1A	32 260 043 .. 32 262 299 (+)	2259	G	CC: integral component of membrane	Bidirectional sugar transporter SWEET	SWEET sugar transporter
TraesCS1A01G050500	1A	32 281 302 .. 32 280 860 (-)	442	G		RING/U-box superfamily protein
TraesCS1A01G050600	1A	32 291 317 .. 32 292 106 (+)	789	G	BP: defense response	Defensin	Knottin, scorpion toxin-like; Defensin, plant
TraesCS1A01G050700	1A	32 302 130 .. 32 302 932 (+)	802	G	BP: defense response	Defensin	Knottin, scorpion toxin-like; Defensin, plant
TraesCS1A01G050800	1A	32 451 297 .. 32 452 090 (+)	793	G	BP: defense response	Defensin	Knottin, scorpion toxin-like; Defensin, plant
TraesCS1A01G050900	1A	32 454 117 .. 32 455 183 (+)	1066	G	BP: defense response	Defensin	Knottin, scorpion toxin-like; Defensin, plant
TraesCS1A01G051000	1A	32 476 408 .. 32 472 235 (-)	4173	G		F-box protein	FBD domain
TraesCS1A01G051100	1A	32 544 945 .. 32 547 585 (+)	2640	TE?		F-box/LRR-repeat protein	Leucine-rich repeat, cysteine-containing subtype; Leucine-rich repeat domain, L domain-like
TraesCS1A01G051200	1A	32 549 428 .. 32 552 583 (+)	3155	G		Casein kinase I
TraesCS1A01G051300	1A	32 890 600 .. 32 894 593 (+)	3993	G		WEB family protein, chloroplastic	WEB family
TraesCS1A01G051400	1A	32 895 825 .. 32 901 535 (+)	5710	G	MF: actin binding	Kinase interacting (KIP1-like) family protein	Protein Networked (NET), actin-binding (NAB) domain
TraesCS1A01G051500	1A	33 019 233 .. 33 022 457 (+)	3224	G		Prostaglandin E synthase 3	CS domain; HSP20-like chaperone
TraesCS1A01G051600	1A	33 229 752 .. 33 226 677 (-)	3075	TE?	MF: protein binding	F-box family protein	F-box domain; Leucine-rich repeat domain, L domain-like
TraesCS1A01G051700	1A	33 370 767 .. 33 373 330 (+)	2563	G	MF: calcium ion binding; MF: calcium-dependent phospholipid binding	Glycine-rich protein A3	Annexin A7
TraesCS1A01G051800	1A	33 374 973 .. 33 373 636 (-)	1337	G		Protein aluminum sensitive 3	UPF0014 family
TraesCS1A01G051900	1A	33 377 767 .. 33 375 413 (-)	2354	G		transmembrane protein	Protein of unknown function DUF4535
TraesCS1A01G052000	1A	33 398 955 .. 33 397 501 (-)	1454	G	MF: DNA binding	Wuschel-related homeobox protein	Homeobox domain; Homeobox domain-like
TraesCS1A01G052100	1A	34 149 852 .. 34 146 866 (-)	2986	G	MF: calcium ion binding; CC: endoplasmic reticulum; BP: protein folding; MF: unfolded protein binding	Calreticulin	Calreticulin/calnexin; Concanavalin A-like lectin/glucanase domain; Calreticulin/calnexin, conserved site
TraesCS1A01G052200	1A	34 158 622 .. 34 170 633 (+)	12011	G		DUF810 family protein	Protein of unknown function DUF810; Munc13 homology 1
TraesCS1A01G052300	1A	34 410 005 .. 34 406 139 (-)	3866	G	MF: hydrolase activity, acting on ester bonds	GDSL esterase/lipase	GDSL lipase/esterase; SGNH hydrolase-type esterase domain
TraesCS1A01G052400	1A	34 425 461 .. 34 427 079 (+)	1618	TE?		Helicase domain-containing family protein
TraesCS1A01G052500	1A	34 534 324 .. 34 535 078 (+)	754	G		CASP-like protein	Domain of unknown function DUF588
TraesCS1A01G052600	1A	34 708 072 .. 34 707 319 (-)	753	G	MF: manganese ion binding; MF: nutrient reservoir activity	Germin-like protein	Germin; Cupin 1; RmlC-like cupin domain; RmlC-like jelly roll fold; Germin, manganese binding site
TraesCS1A01G052700	1A	34 860 574 .. 34 859 821 (-)	753	G	MF: manganese ion binding; MF: nutrient reservoir activity	Germin-like protein	Germin; Cupin 1; RmlC-like cupin domain; RmlC-like jelly roll fold; Germin, manganese binding site
TraesCS1A01G052800	1A	34 877 981 .. 34 878 756 (+)	775	G		CASP-like protein
TraesCS1A01G052900	1A	34 886 197 .. 34 885 342 (-)	855	G	MF: manganese ion binding; MF: nutrient reservoir activity	Germin-like protein	Germin; Cupin 1; RmlC-like cupin domain; RmlC-like jelly roll fold; Germin, manganese binding site
TraesCS1A01G053000	1A	34 891 789 .. 34 890 829 (-)	960	G	MF: manganese ion binding; MF: nutrient reservoir activity	Germin-like protein	Germin; Cupin 1; RmlC-like cupin domain; RmlC-like jelly roll fold; Germin, manganese binding site
TraesCS1A01G053100	1A	34 940 230 .. 34 939 460 (-)	770	G	MF: manganese ion binding; MF: nutrient reservoir activity	Germin-like protein	Germin; Cupin 1; IPR011051: RmlC-like cupin domain; RmlC-like jelly roll fold; Germin, manganese binding site
TraesCS1A01G053200	1A	35 297 621 .. 35 296 615 (-)	1006	G		Per os infectivity factor 1
TraesCS1A01G053300	1A	35 486 005 .. 35 487 282 (+)	1277	G		DUF1639 family protein	Protein of unknown function DUF1639
TraesCS1A01G053400	1A	35 491 194 .. 35 492 444 (+)	1250	TE?	MF: protein binding	F-box family protein	F-box domain; Domain unknown function DUF295
TraesCS1A01G053500	1A	35 525 794 .. 35 526 586 (+)	792	G		DUF1639 family protein	Protein of unknown function DUF1639
TraesCS1A01G053600	1A	35 528 837 .. 35 532 835 (+)	3998	TE?	MF: protein binding	F-box family protein	F-box domain; Domain unknown function DUF295
TraesCS1A01G053700	1A	35 532 835 .. 35 533 934 (+)	1099	G	MF: small protein activating enzyme activity	Ubiquitin activating enzyme E1	THIF-type NAD/FAD binding fold; Ubiquitin-activating enzyme, catalytic cysteine domain; Ubiquitin-activating enzyme E1, Cys active site
TraesCS1A01G053800	1A	35 536 206 .. 35 537 473 (+)	1267	G		DUF1639 family protein	Protein of unknown function DUF1639
TraesCS1A01G053900	1A	35 540 807 .. 35 539 945 (-)	862	TE		Retrotransposon protein, putative, unclassified
TraesCS1A01G054000	1A	35 543 825 .. 35 542 718 (-)	1107	G		Protein SENSITIVITY TO RED LIGHT REDUCED 1	Sensitivity To Red Light Reduced-like, SRR1
TraesCS1A01G054100	1A	35 558 964 .. 35 558 527 (-)	437	TE		Transposon protein, putative, CACTA, En/Spm sub-class
TraesCS1A01G054200	1A	35 578 714 .. 35 577 373 (-)	1341	G		DUF1639 family protein	Protein of unknown function DUF1639
TraesCS1A01G054300	1A	35 931 964 .. 35 936 127 (+)	4163	G		Nuclear factor related to kappa-B-binding protein
TraesCS1A01G054400	1A	35 944 326 .. 35 937 734 (-)	6592	G	MF: microtubule motor activity; MF: ATP binding; BP: microtubule-based movement; MF: microtubule binding	Kinesin-like protein	Kinesin motor domain; Kinesin motor domain, conserved site; P-loop containing nucleoside triphosphate hydrolase
TraesCS1A01G054600	1A	36 172 789 .. 36 174 008 (+)	1219	G		Tetrapyrrole (Corrin/Porphyrin) Methylase
TraesCS1A01G054500	1A	36 174 659 .. 36 171 530 (-)	3129	G	MF: protein binding	Pentatricopeptide repeat-containing protein	Pentatricopeptide repeat; Tetratricopeptide-like helical domain
TraesCS1A01G054700	1A	36 187 672 .. 36 185 753 (-)	1919	G		Pentatricopeptide repeat-containing protein	Pentatricopeptide repeat
TraesCS1A01G054700	1A	36 188 482 .. 36 185 622 (-)	2860	G		Pentatricopeptide repeat-containing protein	Pentatricopeptide repeat
TraesCS1A01G054800	1A	36 261 215 .. 36 259 368 (-)	1847	G		Pentatricopeptide repeat-containing protein	Pentatricopeptide repeat
TraesCS1A01G054900	1A	36 269 319 .. 36 267 235 (-)	2084	TE?	MF: nucleic acid binding	Zinc finger protein, putative	Zinc finger, RING/FYVE/PHD-type; Zinc finger C2H2-type
TraesCS1A01G055000	1A	36 271 325 .. 36 278 335 (+)	7010	G	CC: integral component of membrane	Integral membrane protein, TerC family protein	Integral membrane protein TerC; Integral membrane protein TerC, riboswitch-linked
TraesCS1A01G055100	1A	36 272 082 .. 36 271 402 (-)	680	G		FtsH extracellular protease family
TraesCS1A01G055200	1A	36 281 199 .. 36 278 601 (-)	2598	G		Transmembrane protein, putative	Protein of unknown function DUF1218
TraesCS1A01G055300	1A	36 555 323 .. 36 556 600 (+)	1277	G		Epsin	ENTH/VHS; ENTH domain
TraesCS1A01G055400	1A	36 561 933 .. 36 569 908 (+)	7975	G		DIS3-like exonuclease 2	Winged helix-turn-helix DNA-binding domain; Nucleic acid-binding, OB-fold
TraesCS1A01G055500	1A	36 605 149 .. 36 605 802 (+)	653	G		Pentatricopeptide repeat-containing protein	Pentatricopeptide repeat
TraesCS1A01G055600	1A	36 606 299 .. 36 607 276 (+)	977	G		Pentatricopeptide repeat-containing protein	Pentatricopeptide repeat
TraesCS1A01G055700	1A	36 606 873 .. 36 606 494 (-)	379	G		Two-component response regulator ARR17
TraesCS1A01G055800	1A	36 613 172 .. 36 615 621 (+)	2449	G	MF: protein binding	Pentatricopeptide repeat-containing protein	Pentatricopeptide repeat; Tetratricopeptide-like helical domain
TraesCS1A01G055900	1A	36 621 713 .. 36 620 347 (-)	1366	G	MF: hydrolase activity, hydrolyzing O-glycosyl compounds; BP: carbohydrate metabolic process	Glucan endo-1,3-beta-glucosidase, putative	Glycoside hydrolase family 17; Glycoside hydrolase superfamily
TraesCS1A01G056000	1A	36 636 677 .. 36 637 977 (+)	1300	G		Pentatricopeptide repeat-containing protein	Pentatricopeptide repeat
TraesCS1A01G056100	1A	36 763 635 .. 36 761 839 (-)	1796	G		Protein ABIL1
TraesCS1A01G056200	1A	36 766 338 .. 36 765 924 (-)	414	G		ALMT1-M39.2
TraesCS1A01G056300	1A	36 768 334 .. 36 767 836 (-)	498	TE		Retrotransposon protein SINE subclass
TraesCS1A01G056400	1A	36 770 407 .. 36 769 724 (-)	683	G		Class II aminoacyl-tRNA and biotin synthetases superfamily protein
TraesCS1A01G056500	1A	36 774 424 .. 36 772 140 (-)	2284	TE?	MF: protein binding	F-box family protein	F-box domain; Leucine-rich repeat, cysteine-containing subtype; Leucine-rich repeat domain, L domain-like
TraesCS1A01G056600	1A	36 776 373 .. 36 780 640 (+)	4267	G		Pyrimidine-specific ribonucleoside hydrolase	Inosine/uridine-preferring nucleoside hydrolase domain
TraesCS1A01G056700	1A	36 794 163 .. 36 794 789 (+)	626	G	BP: metal ion transport; MF: metal ion binding	Heavy metal transport/detoxification protein	Heavy metal-associated domain, HMA
TraesCS1A01G056800	1A	36 823 911 .. 36 824 339 (+)	428	G	BP: metal ion transport; MF: metal ion binding	Heavy metal transport/detoxification protein	Heavy metal-associated domain, HMA
TraesCS1A01G056900	1A	36 839 920 .. 36 840 861 (+)	971	G		30S ribosomal protein S4
TraesCS1A01G057000	1A	37 439 847 .. 37 460 883 (+)	21036	G	BP: tRNA processing	tRNA dimethylallyltransferase	tRNA dimethylallyltransferase; P-loop containing nucleoside triphosphate hydrolase
TraesCS1A01G057100	1A	37 465 850 .. 37 468 260 (+)	2410	TE?	MF: protein binding	F-box protein	F-box domain
TraesCS1A01G057200	1A	37 478 206 .. 37 481 881 (+)	3675	G	MF: glutamyl-tRNA reductase activity; BP: tetrapyrrole biosynthetic process;MF: NADP binding; BP: oxidation-reduction process	Glutamyl-tRNA reductase	Tetrapyrrole biosynthesis, glutamyl-tRNA reductase; Quinate/shikimate 5-dehydrogenase/glutamyl-tRNA reductase; Tetrapyrrole biosynthesis, glutamyl-tRNA reductase, N-terminal; Tetrapyrrole biosynthesis, glutamyl-tRNA reductase, dimerisation domain; NAD(P)-binding domain; Glutamyl-tRNA reductase, conserved site
TraesCS1A01G057300	1A	37 504 986 .. 37 502 130 (-)	2856	G	MF: protein binding	Pentatricopeptide repeat-containing protein	Pentatricopeptide repeat; Tetratricopeptide-like helical domain
TraesCS1A01G057400	1A	37 512 267 .. 37 509 895 (-)	2372	G		Pentatricopeptide repeat-containing protein	Pentatricopeptide repeat
TraesCS1A01G057500	1A	37 510 298 .. 37 510 492 (+)	194	G		response regulator 17
TraesCS1A01G057600	1A	37 622 853 .. 37 619 290 (-)	3563	G		carboxyl-terminal peptidase (DUF239)	Neprosin
TraesCS1A01G057700	1A	38 344 819 .. 38 343 191 (-)	1628	G		Alpha/beta-Hydrolases superfamily protein
TraesCS1A01G057800	1A	38 359 265 .. 38 359 954 (+)	689	TE?	MF: protein binding	F-box protein	F-box domain
TraesCS1A01G057900	1A	38 368 653 .. 38 366 744 (-)	1909	G		Remorin family protein	Remorin, C-terminal
TraesCS1A01G058000	1A	38 485 543 .. 38 484 393 (-)	1150	G		Disease resistance protein (CC-NBS-LRR class) family
QGpc.ippg-1A.2
TraesCS1A01G063300	1A	44 367 067 .. 44 363 599 (-)	3468	TE?	MF: protein binding	FBD-associated F-box protein	F-box domain; FBD domain; Leucine-rich repeat domain, L domain-like
TraesCS1A01G063400	1A	44 370 833 .. 44 369 582 (-)	1251	TE?	MF: protein binding	F-box family protein	F-box domain
TraesCS1A01G063500	1A	44 407 943 .. 44 406 439 (-)	1504	TE?	MF: zinc ion binding	DNL-type zinc finger protein	Zinc finger, DNL-type
TraesCS1A01G063600	1A	44 408 101 .. 44 411 901 (+)	3800	G		Ubiquitin-conjugating enzyme E2	Ubiquitin-conjugating enzyme E2; Ubiquitin-conjugating enzyme/RWD-like; Ubiquitin-conjugating enzyme, active site
TraesCS1A01G063700	1A	45 105 139 .. 45 104 452 (-)	687	TE		Retrotransposon protein, putative, unclassified
TraesCS1A01G063800	1A	45 498 411 .. 45 498 142 (-)	269	G		Cyst nematode resistance protein-like
TraesCS1A01G063900	1A	45 503 738 .. 45 503 334 (-)	404	TE		Ribonuclease H-like superfamily protein
TraesCS1A01G064000	1A	45 543 088 .. 45 548 553 (+)	5465	G	MF: galactosylgalactosylxylosylprotein 3-beta-glucuronosyltransferase activity; CC: membrane	Glycosyltransferases	Glycosyl transferase, family 43; Nucleotide-diphospho-sugar transferases
TraesCS1A01G064100	1A	45 793 606 .. 45 797 826 (+)	4220	G	MF: protein binding	Protein IQ-DOMAIN 1	IQ motif, EF-hand binding site; Domain of unknown function DUF4005
TraesCS1A01G064200	1A	45 858 080 .. 45 854 057 (-)	4023	G	MF: nucleic acid binding	Rho guanine nucleotide exchange factor	RNA recognition motif domain
TraesCS1A01G064300	1A	46 202 525 .. 46 201 009 (-)	1516	G		Crotonobetainyl-CoA dehydrogenase
TraesCS1A01G064400	1A	46 258 251 .. 46 248 399 (-)	9852	G		Prenyltransferase nscD
TraesCS1A01G064500	1A	46 296 502 .. 46 289 343 (-)	7159	G		Crotonobetainyl-CoA dehydrogenase
TraesCS1A01G064600	1A	46 310 369 .. 46 299 890 (-)	10479	TE?	MF: nucleic acid binding	CCCH-type zinc fingerfamily protein with RNA-binding domain-containing protein	RNA recognition motif domain
TraesCS1A01G064700	1A	46 441 567 .. 46 442 778 (+)	1211	G		Ribosomal RNA large subunit methyltransferase E	Domain unknown function DUF295
TraesCS1A01G064800	1A	47 194 404 .. 47 185 808 (-)	8596	G	MF: catalytic activity; MF: alpha,alpha-trehalose-phosphate synthase (UDP-forming) activity; BP: trehalose biosynthetic process	Trehalose-6-phosphate synthase	Glycosyl transferase, family 20; Trehalose-phosphatase; Alpha,alpha-trehalose-phosphate synthase; HAD-like domain
TraesCS1A01G064900	1A	47 204 919 .. 47 201 867 (-)	3052	G	MF: transporter activity; CC: membrane; CC: integral component of membrane; MF: transmembrane transporter activity; MF: substrate-specific transmembrane transporter activity; BP: transmembrane transport	Sugar transporter, putative	Sugar/inositol transporter; Major facilitator, sugar transporter-like; Sugar transporter, conserved site; Major facilitator superfamily domain
TraesCS1A01G065000	1A	47 211 960 .. 47 209 815 (-)	2145	G	MF: binding	Importin subunit beta-1	Armadillo-like helical; Armadillo-type fold
TraesCS1A01G065100	1A	47 214 447 .. 47 213 236 (-)	1211	TE		Retrotransposon protein, putative, Ty1-copia subclass	Leucine-rich repeat protein kinase family protein
TraesCS1A01G065200	1A	47 378 105 .. 47 377 568 (-)	537	G		Leucine-rich repeat protein kinase family protein
TraesCS1A01G065300	1A	47 578 260 .. 47 586 187 (+)	7927	G	MF: protein binding	Transducin/WD-like repeat-protein	WD40 repeat; IPR015943: WD40/YVTN repeat-like-containing domain; IPR017986: WD40-repeat-containing domain
TraesCS1A01G065400	1A	47 799 453 .. 47 806 227 (+)	6774	G	CC: nuclear pore; BP: transport	Nuclear pore complex protein Nup98-Nup96	Peptidase S59, nucleoporin
TraesCS1A01G065500	1A	47 806 140 .. 47 805 904 (-)	236	G		Transcription initiation factor TFIID subunit A
TraesCS1A01G065600	1A	47 827 916 .. 47 823 749 (-)	4167	G	MF: binding; BP: intracellular protein transport; MF: Ran GTPase binding	Importin subunit beta-1	Importin-beta, N-terminal domain; Armadillo-like helical; Armadillo-type fold
TraesCS1A01G065700	1A	48 575 894 .. 48 591 514 (+)	15620	G	MF: protein binding; MF: zinc ion binding	E3 SUMO-protein ligase SIZ1	Zinc finger, PHD-type; SAP domain; Zinc finger, MIZ-type; Zinc finger, FYVE/PHD-type; Zinc finger, RING/FYVE/PHD-type; Zinc finger, PHD-type, conserved site; Zinc finger, PHD-finger
TraesCS1A01G065800	1A	48 594 183 .. 48 592 864 (-)	1319	G		Protamine P1 family protein
TraesCS1A01G065900	1A	48 707 143 .. 48 703 230 (-)	3913	G		Cold-responsive protein WCOR15-2A
TraesCS1A01G066000	1A	48 729 584 .. 48 725 007 (-)	4577	G	MF: binding; CC: nucleus	Condensin-2 complex subunit G2	Armadillo-like helical; Armadillo-type fold; Condensin-2 complex subunit G2
TraesCS1A01G066100	1A	48 771 094 .. 48 776 849 (+)	5755	G	MF: nutrient reservoir activity	11S globulin seed storage protein	11-S seed storage protein, plant; Cupin 1; RmlC-like cupin domain; RmlC-like jelly roll fold
TraesCS1A01G066200	1A	48 783 668 .. 48 786 472 (+)	2804	G	MF: protein kinase activity; MF: ATP binding; BP: protein phosphorylation; MF: carbohydrate binding	Lectin receptor kinase-like protein	Protein kinase domain; Legume lectin domain; Serine/threonine-protein kinase, active site; Protein kinase-like domain; Concanavalin A-like lectin/glucanase domain; Protein kinase, ATP binding site
TraesCS1A01G066300	1A	48 966 062 .. 48 979 283 (+)	13221	G	BP: protein glycosylation; MF: galactosyltransferase activity; CC: membrane; MF: carbohydrate binding	Beta 1, 3 galactosyltransferase	Galectin, carbohydrate recognition domain; Glycosyl transferase, family 31; Concanavalin A-like lectin/glucanase domain
TraesCS1A01G066400	1A	48 979 589 .. 48 982 811 (+)	3222	G	MF: dihydrolipoyl dehydrogenase activity; MF: oxidoreductase activity; MF: oxidoreductase activity, acting on a sulfur group of donors, NAD(P) as acceptor; BP: cell redox homeostasis; MF: flavin adenine dinucleotide binding; BP: oxidation-reduction process	Dihydrolipoyl dehydrogenase	Pyridine nucleotide-disulphide oxidoreductase, dimerisation domain; Dihydrolipoamide dehydrogenase; Pyridine nucleotide-disulphide oxidoreductase, class I, active site; FAD/NAD-linked reductase, dimerisation domain; FAD/NAD(P)-binding domain
TraesCS1A01G066500	1A	48 993 388 .. 48 992 816 (-)	572	G		Pentatricopeptide repeat superfamily protein	Pentatricopeptide repeat
TraesCS1A01G066600	1A	48 999 728 .. 48 998 937 (-)	791	G		Pentatricopeptide repeat-containing protein	Pentatricopeptide repeat
TraesCS1A01G066700	1A	49 096 241 .. 49 100 322 (+)	4081	G	MF: protein kinase activity; MF: ATP binding; BP: protein phosphorylation	Kinase family protein	Protein kinase domain; Serine/threonine-protein kinase, active site; Protein kinase-like domain; Protein kinase, ATP binding site
TraesCS1A01G066800	1A	49 101 719 .. 49 099 224 (-)	2495	G	MF: acyl-CoA dehydrogenase activity; BP: metabolic process; MF: oxidoreductase activity, acting on the CH-CH group of donors; BP: oxidation-reduction process	Acyl-CoA dehydrogenase	Acyl-CoA dehydrogenase, conserved site; Acyl-CoA oxidase/dehydrogenase, central domain; Acyl-CoA dehydrogenase/oxidase C-terminal; Acyl-CoA dehydrogenase/oxidase, N-terminal and middle domain
TraesCS1A01G066900	1A	49 149 510 .. 49 154 022 (+)	4512	G	MF: ATP binding	p-loop containing nucleoside triphosphate hydrolases superfamily protein	AAA+ ATPase domain; ATPase, AAA-type, core; P-loop containing nucleoside triphosphate hydrolase
TraesCS1A01G067000	1A	49 245 482 .. 49 250 648 (+)	5166	G		Pentatricopeptide repeat-containing protein	Pentatricopeptide repeat
TraesCS1A01G067100	1A	49 247 229 .. 49 247 035 (-)	194	G		response regulator 17
TraesCS1A01G067200	1A	49 254 104 .. 49 251 327 (-)	2777	G	MF: double-stranded DNA binding; BP: regulation of transcription, DNA-templated	Mitochondrial transcription termination factor family protein, putative	Transcription termination factor, mitochondrial/chloroplastic
TraesCS1A01G067300	1A	49 269 259 .. 49 288 855 (+)	19596	G	MF: nucleic acid binding; MF: protein binding; CC: nucleus; BP: RNA processing; BP: mRNA processing	Polyribonucleotide nucleotidyltransferase	S1 domain; HAT (Half-A-TPR) repeat; Suppressor of forked; Tetratricopeptide-like helical domain; Nucleic acid-binding, OB-fold; RNA-binding domain, S1
TraesCS1A01G067400	1A	49 293 371 .. 49 297 785 (+)	4414	G		Pentatricopeptide repeat-containing protein	Pentatricopeptide repeat
TraesCS1A01G067500	1A	49 305 054 .. 49 305 620 (+)	566	G		Pentatricopeptide repeat-containing protein	Pentatricopeptide repeat
TraesCS1A01G067600	1A	49 346 641 .. 49 350 652 (+)	4011	G	MF: protein binding	Pentatricopeptide repeat-containing protein	Pentatricopeptide repeat; Tetratricopeptide-like helical domain
TraesCS1A01G067700	1A	49 355 113 .. 49 356 126 (+)	1013	G		Pentatricopeptide repeat-containing protein	Pentatricopeptide repeat
TraesCS1A01G067900	1A	49 361 011 .. 49 363 692 (+)	2681	G	CC: integral component of membrane	Tetraspanin family protein	Tetraspanin/Peripherin
TraesCS1A01G068000	1A	49 367 228 .. 49 365 311 (-)	1917	G		protein translocase subunit
TraesCS1A01G068100	1A	49 487 661 .. 49 485 546 (-)	2115	G		neuronal PAS domain protein
TraesCS1A01G068200	1A	49 518 411 .. 49 516 730 (-)	1681	G		PLATZ transcription factor	Protein of unknown function DUF597
TraesCS1A01G068300	1A	49 532 463 .. 49 526 825 (-)	5638	G	MF: DNA binding	Nuclear receptor corepressor 1	SANT/Myb domain; Homeobox domain-like; IPR017884: SANT domain
TraesCS1A01G068400	1A	49 897 878 .. 49 896 641 (-)	1237	G		Peptide methionine sulfoxide reductase MsrB
TraesCS1A01G068500	1A	49 961 536 .. 49 960 688 (-)	848	G		Peptide methionine sulfoxide reductase MsrB	Mss4-like
TraesCS1A01G068600	1A	49 967 321 .. 49 971 213 (+)	3892	G	MF: hydrolase activity, hydrolyzing O-glycosyl compounds; BP: carbohydrate metabolic process	Glycosyl hydrolase family protein 43, putative, expressed	Glycoside hydrolase, family 43; Glycosyl hydrolase, five-bladed beta-propellor domain
TraesCS1A01G068700	1A	49 973 452 .. 49 972 817 (-)	635	G		arginine N-methyltransferase, putative (DUF688)
TraesCS1A01G068800	1A	50 511 541 .. 50 512 089 (+)	548	G		DNA topoisomerase
TraesCS1A01G068900	1A	50 539 888 .. 50 538 726 (-)	1162	G		GH3.3	GH3 family
TraesCS1A01G069000	1A	50 631 948 .. 50 631 574 (-)	374	G		bZIP transcription factor family protein
TraesCS1A01G069100	1A	50 841 064 .. 50 837 517 (-)	3547	G		CsAtPR5
TraesCS1A01G069200	1A	50 845 185 .. 50 842 537 (-)	2648	G		CsAtPR5
QGpc.ippg-1A.3
TraesCS1A01G193400	1A	350 401 398 .. 350 395 521 (-)	5877	G	MF: DNA binding; BP: regulation of transcription, DNA-templated;GO:0008289 MF: lipid binding; MF: sequence-specific DNA binding	Homeobox-leucine zipper family protein	Homeobox domain; START domain; Homeobox domain-like; Homeobox, conserved site; START-like domain
TraesCS1A01G193500	1A	350 749 390 .. 350 752 293 (+)	2903	G		Plastid-lipid-Associated Protein	Plastid lipid-associated protein/fibrillin conserved domain
TraesCS1A01G193600	1A	350 763 077 .. 350 752 534 (-)	10543	G	MF: binding	TELO2-interacting protein 1	Armadillo-like helical; Armadillo-type fold
TraesCS1A01G193700	1A	351 211 684 .. 351 212 265 (+)	581	G	MF: calcium ion binding	Calmodulin	EF-hand domain; EF-hand domain pair; EF-Hand 1, calcium-binding site
TraesCS1A01G193800	1A	351 340 625 .. 351 340 980 (+)	355	G		transmembrane protein, putative
TraesCS1A01G193900	1A	351 345 047 .. 351 343 639 (-)	1408	G		Non-capsid protein NS-1
TraesCS1A01G194000	1A	351 344 987 .. 351 347 996 (+)	3009	G		NADH dehydrogenase [ubiquinone] 1 beta subcomplex subunit 10	NADH-ubiquinone oxidoreductase, subunit 10
TraesCS1A01G194100	1A	351 350 790 .. 351 349 023 (-)	1767	G	MF: magnesium ion binding; MF: ATP binding; CC: intracellular; BP: inositol trisphosphate metabolic process; MF: inositol tetrakisphosphate 1-kinase activity; MF: inositol-1,3,4-trisphosphate 6-kinase activity; MF: inositol-1,3,4-trisphosphate 5-kinase activity	Inositol-tetrakisphosphate 1-kinase	Inositol-tetrakisphosphate 1-kinase
TraesCS1A01G194200	1A	351 476 085 .. 351 474 705 (-)	1380	G	MF: protein binding	Tetratricopeptide repeat (TPR)-like superfamily protein	Tetratricopeptide-like helical domain; Tetratricopeptide repeat-containing domain
TraesCS1A01G194300	1A	351 596 681 .. 351 596 076 (-)	605	TE		Transposon TX1 uncharacterized	Endonuclease/exonuclease/phosphatase
TraesCS1A01G194400	1A	351 608 182 .. 351 604 602 (-)	3580	G		ER-based factor for assembly of V-ATPase	ATPase, vacuolar ER assembly factor, Vma12
TraesCS1A01G194500	1A	351 856 640 .. 351 857 125 (+)	485	G		VQ motif protein
TraesCS1A01G194600	1A	351 859 473 .. 351 856 915 (-)	2558	TE?		F-box/LRR-repeat protein 20
TraesCS1A01G194700	1A	351 863 846 .. 351 859 608 (-)	4238	G		WEB family protein, chloroplastic
TraesCS1A01G194800	1A	351 878 373 .. 351 882 317 (+)	3944	G		(RAP Annotation release2) NERD domain containing protein	Nuclease-related domain, NERD
TraesCS1A01G194900	1A	351 886 581 .. 351 882 936 (-)	3645	G		Cinnamoyl-CoA reductase-like protein	NAD(P)-binding domain
TraesCS1A01G195000	1A	352 013 037 .. 352 016 495 (+)	3458	G		Replication protein A DNA-binding subunit	Nucleic acid-binding, OB-fold; Replication factor A, C-terminal
TraesCS1A01G195100	1A	352 140 961 .. 352 136 861 (-)	4100	G	CC: intracellular; BP: intracellular protein transport	TOM1-like protein 2	VHS domain; IPR004152: GAT domain; ENTH/VHS; Target of Myb protein 1
TraesCS1A01G195200	1A	352 180 076 .. 352 173 116 (-)	6960	G	MF: glycerol-3-phosphate O-acyltransferase activity; BP: glycerophospholipid metabolic process; BP: metabolic process; MF: transferase activity, transferring acyl groups	Glycerol-3-phosphate acyltransferase, chloroplastic	Phospholipid/glycerol acyltransferase; Glycerol-3-phosphate O-acyltransferase, chloroplast; Glycerol-3-phosphate O-acyltransferase, alpha helical bundle, N-terminal
TraesCS1A01G195300	1A	352 852 084 .. 352 862 015 (+)	9931	G	MF: tRNA binding; MF: nucleotide binding; MF: magnesium ion binding; MF: RNA binding; MF: aminoacyl-tRNA ligase activity; MF: phenylalanine-tRNA ligase activity; MF: ATP binding; CC: cytoplasm; BP: phenylalanyl-tRNA aminoacylation; BP: tRNA aminoacylation	Phenylalanine--tRNA ligase beta subunit	Phenylalanyl-tRNA synthetase; Phenylalanyl-tRNA synthetase, class IIc, beta subunit, archae/euk cytosolic; B3/B4 tRNA-binding domain; tRNA synthetase, B5-domain; Putative DNA-binding domain; Phenylalanyl-tRNA synthetase, B3/B4
TraesCS1A01G195400	1A	353 251 752 .. 353 256 652 (+)	4810	G	MF: NAD+ ADP-ribosyltransferase activity	Poly [ADP-ribose] polymerase	Poly(ADP-ribose) polymerase, catalytic domain; RST domain of plant C-terminal
TraesCS1A01G195500	1A	353 259 995 .. 353 256 784 (-)	3211	G		Shikimate kinase	CS domain; HSP20-like chaperone; Shikimate kinase/gluconokinase
TraesCS1A01G195600	1A	353 279 864 .. 353 280 145 (+)	281	TE	MF: protein dimerization activity	Zinc finger MYM-type protein 1	HAT, C-terminal dimerisation domain
TraesCS1A01G195700	1A	353 631 621 .. 353 625 764 (-)	5857	G		Lysine-specific demethylase	JmjC domain; IPR003349: JmjN domain; Zinc finger, C5HC2-type
TraesCS1A01G195800	1A	353 660 357 .. 353 661 166 (+)	809	TE		Retrotransposon protein, putative, unclassified
TraesCS1A01G195900	1A	353 913 629 .. 353 917 286 (+)	3657	G	MF: hydrolase activity, hydrolyzing O-glycosyl compounds; CC: cell wall; BP: carbohydrate metabolic process; BP: cellular glucan metabolic process; MF: xyloglucan:xyloglucosyl transferase activity; CC: apoplast	Xyloglucan endotransglucosylase/hydrolase	Glycoside hydrolase family 16; Xyloglucan endo-transglycosylase, C-terminal; Concanavalin A-like lectin/glucanase domain
TraesCS1A01G196000	1A	354 189 074 .. 354 191 293 (+)	2219	G		Chalcone-flavanone isomerase family protein
TraesCS1A01G196100	1A	354 295 106 .. 354 299 626 (+)	4520	G	CC: membrane; MF: cellulose synthase (UDP-forming) activity; BP: cellulose biosynthetic process	Cellulose synthase-like protein	Cellulose synthase; Zinc finger, RING/FYVE/PHD-type; Nucleotide-diphospho-sugar transferases
TraesCS1A01G196200	1A	354 302 644 .. 354 299 640 (-)	3004	G	MF: protein binding	Pentatricopeptide repeat-containing protein, putative	Pentatricopeptide repeat; Tetratricopeptide-like helical domain
TraesCS1A01G196300	1A	354 308 075 .. 354 303 689 (-)	4386	G	MF: protein binding	26S proteasome regulatory subunit family protein	Proteasome component (PCI) domain; Winged helix-turn-helix DNA-binding domain
TraesCS1A01G196400	1A	354 824 724 .. 354 823 588 (-)	1136	G	BP: metabolic process; MF: methyltransferase activity	Ubiquinone/menaquinone biosynthesis C-methyltransferase UbiE	Methyltransferase type 11; S-adenosyl-L-methionine-dependent methyltransferase
TraesCS1A01G196500	1A	354 937 526 .. 354 934 937 (-)	2589	G		Antiholin-like protein lrgB	CidB/LrgB family
TraesCS1A01G196600	1A	354 940 442 .. 354 937 759 (-)	2683	G	MF: catalytic activity; BP: biosynthetic process	Choline-phosphate cytidylyltransferase	Cytidyltransferase-like domain; Rossmann-like alpha/beta/alpha sandwich fold
TraesCS1A01G196700	1A	354 948 394 .. 354 943 357 (-)	5037	G	MF: catalytic activity; BP: metabolic process	4-coumarate--CoA ligase family protein	AMP-dependent synthetase/ligase; AMP-binding, conserved site; AMP-binding enzyme C-terminal domain
TraesCS1A01G196800	1A	354 955 890 .. 354 950 050 (-)	5840	G	CC: membrane	ERD (Early-responsive to dehydration stress) family protein	Calcium-dependent channel, 7TM region, putative phosphate; 10TM putative phosphate transporter, cytosolic domain; Calcium permeable stress-gated cation channel 1, N-terminal transmembrane domain
TraesCS1A01G196900	1A	355 025 764 .. 355 026 950 (+)	1186	G		tRNA-splicing ligase RtcB homolog
TraesCS1A01G197000	1A	355 320 321 .. 355 325 145 (+)	4824	G	MF: protein kinase activity; MF: ATP binding; BP: protein phosphorylation	Protein kinase family protein	Protein kinase domain; Serine-threonine/tyrosine-protein kinase, catalytic domain; Tyrosine-protein kinase, active site; Serine/threonine-protein kinase, active site; Protein kinase-like domain; Protein kinase, ATP binding site
TraesCS1A01G197100	1A	355 326 375 .. 355 329 223 (+)	2848	G	MF: iron ion binding; MF: oxidoreductase activity, acting on paired donors, with incorporation or reduction of molecular oxygen; MF: heme binding; BP: oxidation-reduction process	Cytochrome P450 family protein	Cytochrome P450; Cytochrome P450, E-class, group I; Cytochrome P450, conserved site
TraesCS1A01G197200	1A	355 334 094 .. 355 324 903 (-)	9191	G	MF: transporter activity; CC: membrane; CC: integral component of membrane; MF: transmembrane transporter activity; MF: substrate-specific transmembrane transporter activity; BP: transmembrane transport	Sugar transporter family protein	Sugar/inositol transporter; Major facilitator, sugar transporter-like; Sugar transporter, conserved site; Major facilitator superfamily domain
TraesCS1A01G197300	1A	355 338 713 .. 355 335 880 (-)	2833	G	MF: NADH dehydrogenase (ubiquinone) activity; MF: electron carrier activity; CC: membrane	NADH dehydrogenase [ubiquinone] 1 alpha subcomplex subunit 12	NADH dehydrogenase [ubiquinone] 1 alpha subcomplex subunit 12
TraesCS1A01G197400	1A	355 342 845 .. 355 344 381 (+)	1536	G	MF: transcription factor activity, sequence-specific DNA binding; BP: regulation of transcription, DNA-templated; MF: sequence-specific DNA binding	WRKY family transcription factor	WRKY domain
TraesCS1A01G197500	1A	355 348 510 .. 355 345 020 (-)	3490	G	MF: structural constituent of ribosome; CC: intracellular; CC: ribosome; BP: translation	50S ribosomal protein L35	Ribosomal protein L35, non-mitochondrial; Ribosomal protein L35
TraesCS1A01G197600	1A	355 624 056 .. 355 628 073 (+)	4017	G	MF: transporter activity; BP: transport; CC: membrane	Peptide transporter	Proton-dependent oligopeptide transporter family; Major facilitator superfamily domain
TraesCS1A01G197700	1A	355 629 145 .. 355 631 608 (+)	2463	G	MF: transporter activity; BP: transport; CC: membrane	Peptide transporter	Proton-dependent oligopeptide transporter family; Major facilitator superfamily domain
TraesCS1A01G197800	1A	355 714 313 .. 355 716 842 (+)	2529	G	MF: GTP binding; CC: intracellular; BP: small GTPase mediated signal transduction	ADP-ribosylation factor, putative, expressed	Small GTP-binding protein domain; Small GTPase superfamily, ARF/SAR type; Small GTPase superfamily, ARF type; P-loop containing nucleoside triphosphate hydrolase
TraesCS1A01G197900	1A	355 718 260 .. 355 719 087 (+)	827	G		RmlC-like cupins superfamily protein	Domain of unknown function DUF861, cupin-3; RmlC-like cupin domain; IPR014710: RmlC-like jelly roll fold
TraesCS1A01G198000	1A	355 722 734 .. 355 720 785 (-)	1949	G	MF: protein binding; MF: zinc ion binding	RING finger protein	Zinc finger, RING-type; Zinc finger, RING/FYVE/PHD-type; Zinc finger, RING-type, conserved site
TraesCS1A01G198100	1A	355 735 445 .. 355 730 243 (-)	5202	G	MF: protein kinase activity; MF: ATP binding; BP: protein phosphorylation	Kinase-like protein	Protein kinase domain; Serine/threonine-protein kinase, active site; Protein kinase-like domain; Protein kinase, ATP binding site
TraesCS1A01G198200	1A	356 389 927 .. 356 392 775 (+)	2848	G		stress response protein
TraesCS1A01G198300	1A	356 427 950 .. 356 430 605 (+)	2655	G	MF: transporter activity; BP: transport; CC: membrane; BP: transmembrane transport	Urea-proton symporter DUR3	Sodium/solute symporter
TraesCS1A01G198400	1A	356 471 270 .. 356 474 267 (+)	2997	G	MF: serine-type endopeptidase activity; BP: proteolysis	ATP-dependent Clp protease proteolytic subunit	ATP-dependent Clp protease proteolytic subunit; Clp protease proteolytic subunit /Translocation-enhancing protein TepA; ClpP/crotonase-like domain; ClpP, histidine active site
TraesCS1A01G198500	1A	356 476 835 .. 356 474 337 (-)	2498	TE?		zinc finger B-box protein
TraesCS1A01G198600	1A	357 062 296 .. 357 064 921 (+)	2625	G	MF: methyltransferase activity	S-adenosyl-L-methionine-dependent methyltransferases superfamily protein	Putative S-adenosyl-L-methionine-dependent methyltransferase; S-adenosyl-L-methionine-dependent methyltransferase
TraesCS1A01G198700	1A	357 077 269 .. 357 062 029 (-)	15240	G	MF: binding	Serrate RNA effector molecule	Galactose-binding domain-like; Armadillo-type fold
TraesCS1A01G198800	1A	357 123 995 .. 357 121 054 (-)	2941	G		CASP-like protein	Domain of unknown function DUF588
QGpc.ippg-1B
TraesCS1B01G336000	1B	562 898 423 .. 562 888 965 (-)	9458	G	BP: protein transport; CC: integral component of membrane	Secretory carrier-associated membrane protein	SCAMP
TraesCS1B01G336100	1B	563 008 064 .. 563 008 513 (+)	449	TE		Transposon protein, putative, Mutator sub-class	Transposase, MuDR, plant
TraesCS1B01G336200	1B	563 025 033 .. 563 025 878 (+)	845	G		WEB family protein (DUF827)
TraesCS1B01G336300	1B	563 031 942 .. 563 027 538(-)	4404	G	MF: oxidoreductase activity; MF: heme binding; MF: sulfite reductase (ferredoxin) activity; MF: iron-sulfur cluster binding; MF: 4 iron, 4 sulfur cluster binding; BP: oxidation-reduction process	Sulfite reductase [NADPH] hemoprotein beta-component	Nitrite/Sulfite reductase ferredoxin-like domain; Nitrite/sulphite reductase iron-sulphur/sirohaem-binding site; Nitrite/sulphite reductase 4Fe-4S domain; Sulphite reductase, ferredoxin dependent
TraesCS1B01G336400	1B	563 291 885 .. 563 307 192 (+)	15307	G	MF: nucleic acid binding; MF: DNA binding; MF: DNA-directed DNA polymerase activity; MF: ATP binding; BP: DNA replication; BP: DNA-dependent DNA replication	ATP-dependent DNA helicase Hel308	DNA-directed DNA polymerase, family A, palm domain; Helicase, C-terminal; DNA polymerase A; DEAD/DEAH box helicase domain; Ribonuclease H-like domain; Helicase superfamily 1/2, ATP-binding domain; P-loop containing nucleoside triphosphate hydrolase
TraesCS1B01G336500	1B	563 497 688 .. 563 498 547 (+)	859	G		RING/U-box superfamily protein
TraesCS1B01G336600	1B	563 541 754 .. 563 536 848 (-)	4906	TE	MF: nucleic acid binding; MF: zinc ion binding	Retrovirus-related Pol polyprotein from transposon TNT 1-94	Zinc finger, CCHC-type
TraesCS1B01G336700	1B	563 672 980 .. 563 676 512 (+)	3532	G	MF: ADP binding	NBS-LRR disease resistance protein	NB-ARC; Winged helix-turn-helix DNA-binding domain; P-loop containing nucleoside triphosphate hydrolase; Leucine-rich repeat domain, L domain-like
TraesCS1B01G336800	1B	563 787 308 .. 563 788 323 (+)	1015	G		Bifunctional glutamine synthetase adenylyltransferase/adenylyl-removing enzyme
TraesCS1B01G336900	1B	563 997 859 .. 563 996 095 (-)	1764	G		Clavata3/ESR (CLE) gene family member
TraesCS1B01G337000	1B	564 122 446 .. 564 122 003 (-)	443	TE		Retrovirus-related Pol polyprotein from transposon TNT 1-94
TraesCS1B01G337100	1B	564 161 126 .. 564 162 570 (+)	1444	G		Ferredoxin-like
TraesCS1B01G337200	1B	564 165 918 .. 564 162 443 (-)	3475	G	MF: GTPase activity; MF: GTP binding; CC: intracellular; BP: small GTPase mediated signal transduction	Rac-like GTP-binding protein	Small GTPase superfamily; Small GTPase superfamily, Rho type; Small GTP-binding protein domain; P-loop containing nucleoside triphosphate hydrolase
TraesCS1B01G337300	1B	564 636 733 .. 564 631 830 (-)	4903	G		LRR receptor-like serine/threonine-protein kinase FLS2
TraesCS1B01G337400	1B	564 907 284 .. 564 909 441 (+)	2157	G	MF: protein binding	Tetratricopeptide repeat (TPR)-like superfamily protein	Tetratricopeptide-like helical domain; Winged helix-turn-helix DNA-binding domain; Tetratricopeptide repeat-containing domain; Tetratricopeptide repeat 2; Tetratricopeptide repeat
TraesCS1B01G337500	1B	564 921 103 .. 564 918 329 (-)	2774	G		Actin cross-linking protein, putative
TraesCS1B01G337600	1B	565 334 375 .. 565 337 238 (+)	2863	G	MF: binding	ARM repeat superfamily protein	Armadillo-like helical; IPR016024: Armadillo-type fold
TraesCS1B01G337700	1B	565 567 862 .. 565 566 681 (-)	1181	G		Actin cross-linking protein, putative	Domain of unknown function DUF569; Actin cross-linking
TraesCS1B01G337800	1B	565 660 131 .. 565 673 198 (+)	13067	G	BP: regulation of transcription, DNA-templated	Transcription elongation factor Spt5-like protein, putative	Transcription elongation factor Spt5, NGN domain; IPR005824: KOW; NusG, N-terminal; Ribosomal protein L2 domain 2
TraesCS1B01G337900	1B	565 852 027 .. 565 848 891 (-)	3136	G		cDNA clone:J013058P10, full insert sequence
TraesCS1B01G338000	1B	565 919 590 .. 565 920 309 (+)	719	G		transmembrane protein
TraesCS1B01G338100	1B	566 184 287 .. 566 183 644 (-)	643	G		splicing factor PWI domain-containing protein
TraesCS1B01G338200	1B	566 251 163 .. 566 250 681 (-)	482	G		Translation initiation factor IF-2
TraesCS1B01G338300	1B	566 444 409 .. 566 445 050 (+)	641	TE		Retrovirus-related pol polyprotein from transposon tnt 1-94
TraesCS1B01G338400	1B	566 449 932 .. 566 449 681 (-)	251	G		alpha/beta-Hydrolases superfamily protein
TraesCS1B01G338500	1B	566 601 144 .. 566 605 225 (-)	4081	G	BP: proteolysis; MF: cysteine-type peptidase activity	Cysteine protease family protein	Granulin; Cysteine peptidase, cysteine active site; Peptidase C1A, papain C-terminal; Cathepsin propeptide inhibitor domain (I29); Cysteine peptidase, histidine active site; Cysteine peptidase, asparagine active site
TraesCS1B01G338600	1B	566 605 390 .. 566 608 558 (+)	3168	G		Jacalin lectin family protein	Jacalin-like lectin domain
TraesCS1B01G338700	1B	566 610 765 .. 566 611 052 (+)	287	G	MF: DNA binding	B3 domain-containing protein family	B3 DNA binding domain; DNA-binding pseudobarrel domain
TraesCS1B01G338800	1B	566 685 128 .. 566 687 824 (+)	2696	G	BP: cell redox homeostasis	Thioredoxin	Thioredoxin-like fold; Thioredoxin domain; IPR017937: Thioredoxin, conserved site
TraesCS1B01G338900	1B	566 720 877 .. 566 721 457 (+)	580	G		rapid alkalinization factor 23
TraesCS1B01G339000	1B	566 823 400 .. 566 831 663 (+)	8263	G	BP: glycerol ether metabolic process; MF: protein disulfide oxidoreductase activity; BP: cell redox homeostasis	Thioredoxin	Thioredoxin; Thioredoxin-like fold; Thioredoxin domain; Thioredoxin, conserved site
TraesCS1B01G339100	1B	566 836 406 .. 566 831 774 (-)	4632	G	MF: ATP binding; MF: kinase activity	p-loop containing nucleoside triphosphate hydrolases superfamily protein	Zeta toxin domain; P-loop containing nucleoside triphosphate hydrolase
TraesCS1B01G339200	1B	566 848 378 .. 566 836 971 (-)	11407	G	MF: protein binding	MATH domain-containing protein	MATH/TRAF domain; TRAF-like
TraesCS1B01G339300	1B	566 956 934 .. 566 954 050 (-)	2884	G		Ubiquitin carboxyl-terminal hydrolase 2	Protein of unknown function DUF594; Domain of unknown function DUF4220
TraesCS1B01G339400	1B	566 978 051 .. 566 980 638 (+)	2587	G	RNA binding; MF: structural constituent of ribosome; CC: ribosome; BP: translation; CC: small ribosomal subunit	30S ribosomal protein S19	Ribosomal protein S19/S15; Ribosomal protein S19A/S15e; Ribosomal protein S19 conserved site; Ribosomal protein S19, superfamily
TraesCS1B01G339500	1B	566 981 016 .. 566 981 812 (+)	796	G	CC: chloroplast; CC: photosystem II; BP: photosynthesis	Photosystem II reaction center W protein	Photosystem II PsbW, class 2
TraesCS1B01G339600	1B	567 113 505 .. 567 116 436 (+)	2931	G		S-adenosyl-L-methionine-dependent methyltransferases superfamily protein isoform 1	Putative rRNA methylase; S-adenosyl-L-methionine-dependent methyltransferase
QGpc.ippg-1D
TraesCS1D01G328700	1D	420 238 732 .. 420 237 698 (-)	1034	G	MF: chitin binding	Chitinase	Chitin-binding, type 1; Chitin-binding, type 1, conserved site
TraesCS1D01G328800	1D	420 372 510 .. 420 373 318 (+)	808	G		Citrate-binding protein	Concanavalin A-like lectin/glucanase domain; Alginate lyase 2
TraesCS1D01G328900	1D	420 379 950 .. 420 378 924 (-)	1026	G	MF: chitin binding	Chitinase	Chitin-binding, type 1; Chitin-binding, type 1, conserved site
TraesCS1D01G329000	1D	420 536 196 .. 420 539 853 (+)	3657	G	MF: oxidoreductase activity; BP: oxidation-reduction process	NADH-quinone oxidoreductase, subunit E	NADH-quinone oxidoreductase subunit E-like; Thioredoxin-like fold
TraesCS1D01G329100	1D	420 540 492 .. 420 546 351 (+)	5859	G	BP: pseudouridine synthesis; MF: RNA binding; BP: RNA modification; MF: pseudouridine synthase activity	tRNA pseudouridine synthase d, putative	Pseudouridine synthase, TruD; Pseudouridine synthase, TruD, insertion domain; Pseudouridine synthase, catalytic domain; Pseudouridine synthase TruD, conserved site
TraesCS1D01G329200	1D	420 549 825 .. 420 546 981 (-)	3474	G		Tesmin/TSO1-like CXC domain containing protein	CRC domain; Tesmin/TSO1-like CXC domain
TraesCS1D01G329300	1D	420 567 257 .. 420 553 570 (-)	13687	G	MF: GTPase activity; MF: GTP binding; BP: SRP-dependent cotranslational protein targeting to membrane; MF: 7S RNA binding; CC: signal recognition particle	Signal recognition particle 54 kDa protein	Signal recognition particle, SRP54 subunit, GTPase domain; AAA+ ATPase domain; Signal recognition particle, SRP54 subunit, M-domain; Signal recognition particle, SRP54 subunit, eukaryotic; Signal recognition particle, SRP54 subunit, helical bundle; Signal recognition particle, SRP54 subunit; P-loop containing nucleoside triphosphate hydrolase
TraesCS1D01G329400	1D	420 596 732 .. 420 601 377 (+)	4645	G		Formin-like protein	Formin, FH2 domain
TraesCS1D01G329500	1D	420 641 345 .. 420 640 745 (-)	600	G		Sucrose-binding protein-like protein
TraesCS1D01G329600	1D	420 649 454 .. 420 649 771 (+)	317	G		DUF1677 family protein	Protein of unknown function DUF1677, plant
TraesCS1D01G329700	1D	420 652 460 .. 420 650 870 (-)	1590	G	MF: single-stranded DNA binding	Single-stranded DNA-binding protein	Primosome PriB/single-strand DNA-binding; Nucleic acid-binding, OB-fold
TraesCS1D01G329800	1D	420 660 822 .. 420 656 932 (-)	3890	G	MF: catalytic activity; CC: transcription factor TFIIF complex; BP: transcription from RNA polymerase II promoter; BP: transcription initiation from RNA polymerase II promoter	Transcription initiation factor IIF subunit beta	Transcription initiation factor IIF, beta subunit; Transcription Factor IIF, Rap30/Rap74, interaction; Winged helix-turn-helix DNA-binding domain
TraesCS1D01G329900	1D	420 742 425 .. 420 742 694 (+)	269	G		Endo-1,4-beta-xylanase
TraesCS1D01G330000	1D	420 748 217 .. 420 745 515 (-)	2702	G	MF: endopeptidase inhibitor activity	Kunitz trypsin inhibitor	Proteinase inhibitor I3, Kunitz legume; Kunitz inhibitor ST1-like
TraesCS1D01G330000	1D	420 749 852 .. 420 747 827 (-)	2025	G		Transcription initiation factor IIF subunit beta
TraesCS1D01G330200	1D	420 853 296 .. 420 846 087 (-)	7209	G	MF: endopeptidase inhibitor activity	Kunitz trypsin inhibitor	Proteinase inhibitor I3, Kunitz legume; Kunitz inhibitor ST1-like
TraesCS1D01G330300	1D	420 860 814 .. 420 855 641 (-)	5173	G	BP: recognition of pollen	Serine/threonine-protein kinase	S-locus glycoprotein domain; Bulb-type lectin domain; PAN/Apple domain
TraesCS1D01G330400	1D	420 892 136 .. 420 899 996 (+)	7860	G	MF: protein kinase activity; MF: ATP binding; BP: protein phosphorylation	Protein kinase	Protein kinase domain; Serine-threonine/tyrosine-protein kinase, catalytic domain; Protein kinase-like domain
TraesCS1D01G330500	1D	420 923 419 .. 420 929 157 (+)	5738	G	MF: NAD+ ADP-ribosyltransferase activity; BP: protein ADP-ribosylation	Poly [ADP-ribose] polymerase	BRCT domain; Poly(ADP-ribose) polymerase, regulatory domain; WGR domain; Poly(ADP-ribose) polymerase, catalytic domain; PADR1 domain
TraesCS1D01G330600	1D	421 021 346 .. 421 022 422 (+)	1076	G		LURP-one-like protein	LURP1-related protein domain; Tubby C-terminal-like domain
TraesCS1D01G330700	1D	421 029 077 .. 421 023 345 (-)	5732	G	CC: outer membrane	Outer envelope protein 80, chloroplastic	Bacterial surface antigen (D15)
TraesCS1D01G330800	1D	421 031 358 .. 421 035 935 (+)	4577	G	MF: zinc ion binding	E3 ubiquitin-protein ligase MARCH6	Zinc finger, RING-CH-type; Zinc finger, RING/FYVE/PHD-type
TraesCS1D01G330900	1D	421 085 956 .. 421 085 483 (-)	473	G	MF: DNA binding	B3 domain-containing protein	B3 DNA binding domain; DNA-binding pseudobarrel domain
TraesCS1D01G331000	1D	421 215 894 .. 421 224 513 (+)	8619	G		Coilin	Coilin, N-terminal domain
TraesCS1D01G331100	1D	421 226 124 .. 421 227 361 (+)	1237	G	MF: DNA binding; MF: transcription factor activity, sequence-specific DNA binding; BP: regulation of transcription, DNA-templated	Ethylene-responsive transcription factor	AP2/ERF domain; DNA-binding domain
TraesCS1D01G331200	1D	421 464 934 .. 421 465 644 (+)	710	G	MF: DNA binding; MF: transcription factor activity, sequence-specific DNA binding; BP: regulation of transcription, DNA-templated	Ethylene-responsive transcription factor	AP2/ERF domain; DNA-binding domain
TraesCS1D01G331300	1D	422 051 798 .. 422 058 325 (+)	6527	G	BP: ubiquitin-dependent protein catabolic process; BP: protein deubiquitination; MF: thiol-dependent ubiquitinyl hydrolase activity	Ubiquitin carboxyl-terminal hydrolase	Peptidase C19, ubiquitin carboxyl-terminal hydrolase; Ubiquitin specific protease, conserved site; Ubiquitin specific protease domain
TraesCS1D01G331400	1D	422 289 880 .. 422 292 461 (+)	2581	TE?	MF: protein binding	F-box protein	F-box domain; Leucine-rich repeat domain, L domain-like
TraesCS1D01G331500	1D	422 323 064 .. 422 295 848 (-)	27216	G	MF: binding; MF: protein binding; MF: kinase activity	Serine/threonine-protein kinase	Phosphatidylinositol 3-/4-kinase, catalytic domain; FATC domain; IPR011009: Protein kinase-like domain; Armadillo-like helical; PIK-related kinase; Armadillo-type fold; Phosphatidylinositol 3/4-kinase, conserved site
TraesCS1D01G331600	1D	422 673 772 .. 422 675 475 (+)	1703	G	MF: catalytic activity; BP: cellular amino acid metabolic process; MF: carboxy-lyase activity; BP: carboxylic acid metabolic process; MF: pyridoxal phosphate binding	Tyrosine decarboxylase	Pyridoxal phosphate-dependent decarboxylase; Aromatic-L-amino-acid decarboxylase; Pyridoxal phosphate-dependent transferase, major region, subdomain 1; Pyridoxal phosphate-dependent transferase, subdomain 2; Pyridoxal phosphate-dependent transferase; Pyridoxal-phosphate binding site
TraesCS1D01G331700	1D	422 679 247 .. 422 684 168 (+)	4921	G	MF: protein binding;GO: MF: zinc ion binding	breast cancer associated RING 1	BRCT domain; Zinc finger, RING-type; Zinc finger, RING/FYVE/PHD-type; Zinc finger, RING-type, conserved site; Extended PHD (ePHD) domain
TraesCS1D01G331800	1D	422 737 078 .. 422 736 424 (-)	654	G		Bifunctional inhibitor/lipid-transfer protein/seed storage 2S albumin superfamily protein	Bifunctional inhibitor/plant lipid transfer protein/seed storage helical domain; Hydrophobic seed protein
TraesCS1D01G331900	1D	422 820 175 .. 422 819 530 (-)	645	G		Bifunctional inhibitor/lipid-transfer protein/seed storage 2S albumin superfamily protein	Bifunctional inhibitor/plant lipid transfer protein/seed storage helical domain; Hydrophobic seed protein
TraesCS1D01G332000	1D	422 842 039 .. 422 841 191 (-)	848	G	CC: chloroplast; CC: photosystem II; BP: photosynthesis	Photosystem II reaction center W protein, chloroplastic	Photosystem II PsbW, class 2
TraesCS1D01G332100	1D	422 850 427 .. 422 849 643 (-)	784	G		DNA topoisomerase
TraesCS1D01G332200	1D	422 873 459 .. 422 868 961 (-)	4498	G	MF: transcription factor activity, sequence-specific DNA binding; BP: regulation of transcription, DNA-templated; MF: sequence-specific DNA binding	Basic-leucine zipper (BZIP) transcription factor family	Basic-leucine zipper domain; Basic leucine-zipper, C-terminal
TraesCS1D01G332300	1D	422 992 329 .. 422 992 709 (+)	380	G	CC: chloroplast; CC: photosystem II; BP: photosynthesis	Photosystem II reaction center W protein, chloroplastic	Photosystem II PsbW, class 2
TraesCS1D01G332400	1D	423 013 374 .. 423 012 964 (-)	410	TE	MF: nucleic acid binding	Retrotransposon protein, putative, unclassified	Ribonuclease H-like domain
TraesCS1D01G332500	1D	423 037 576 .. 423 033 751 (-)	3825	G	BP: mRNA splicing, via spliceosome; CC: spliceosomal complex	Thioredoxin	Dim1 family; Thioredoxin-like fold
TraesCS1D01G332600	1D	423 043 505 .. 423 040 944 (-)	2561	G	MF: catalytic activity; BP: lipoate biosynthetic process; CC: chloroplast; MF: lipoate synthase activity; MF: iron-sulfur cluster binding; MF: 4 iron, 4 sulfur cluster binding	Lipoyl synthase	Lipoyl synthase; Elongator protein 3/MiaB/NifB; Radical SAM; Aldolase-type TIM barrel; Lipoyl synthase, chloroplastic; Lipoyl synthase, N-terminal
TraesCS1D01G332700	1D	423 050 224 .. 423 044 165 (-)	6059	G		Protein PAT1-1-like protein
TraesCS1D01G332800	1D	423 059 615 .. 423 057 072 (-)	2543	G	CC: integral component of membrane; BP: transmembrane transport	Phosphate transporter	Major facilitator superfamily; Major facilitator superfamily domain
TraesCS1D01G332900	1D	423 249 887 .. 423 258 135 (+)	8248	G	MF: protein kinase activity; MF: protein serine/threonine kinase activity; MF: ATP binding; BP: protein phosphorylation	Protein kinase	Protein kinase domain; AGC-kinase, C-terminal; Serine/threonine-protein kinase, active site; Protein kinase-like domain; Protein kinase, ATP binding site
TraesCS1D01G333000	1D	423 261 565 .. 423 269 992 (+)	8427	G		Colon cancer-associated protein Mic1-like containing protein, expressed	Colon cancer-associated Mic1-like
TraesCS1D01G333100	1D	423 275 024 .. 423 278 693 (+)	3669	G	MF: protein binding; MF: zinc ion binding	E3 ubiquitin-protein ligase	Zinc finger, RING-type; TRAF-like; Zinc finger, SIAH-type; Zinc finger, RING/FYVE/PHD-type
TraesCS1D01G333200	1D	423 597 891 .. 423 606 735 (+)	8844	G		S-adenosyl-L-methionine-dependent methyltransferases superfamily protein	N2227-like; S-adenosyl-L-methionine-dependent methyltransferase
TraesCS1D01G333300	1D	423 643 651 .. 423 645 115 (+)	1464	G	MF: oxidoreductase activity; BP: oxidation-reduction process	2-oxoglutarate (2OG) and Fe(II)-dependent oxygenase superfamily protein	Oxoglutarate/iron-dependent dioxygenase; Non-haem dioxygenase N-terminal domain; Isopenicillin N synthase-like
TraesCS1D01G333400	1D	423 645 862 .. 423 647 745 (+)	1883	G		F-box/RNI-like superfamily protein	FBD domain; Leucine-rich repeat domain, L domain-like
TraesCS1D01G333500	1D	423 670 382 .. 423 671 434 (+)	1052	G	MF: magnesium ion binding; MF: ATP binding; CC: intracellular; BP: inositol trisphosphate metabolic process; MF: inositol tetrakisphosphate 1-kinase activity; MF: inositol-1,3,4-trisphosphate 6-kinase activity; MF: inositol-1,3,4-trisphosphate 5-kinase activity	Inositol-tetrakisphosphate 1-kinase	Inositol-tetrakisphosphate 1-kinase
TraesCS1D01G333600	1D	423 733 776 .. 423 733 432 (-)	344	G		F-box domain containing protein, expressed	FBD domain
TraesCS1D01G333700	1D	423 737 783 .. 423 736 935 (-)	848	G		Sodium/potassium-transporting ATPase subunit alpha-2	FBD domain
TraesCS1D01G333800	1D	423 763 810 .. 423 766 754 (+)	2944	G	MF: serine-type carboxypeptidase activity; BP: proteolysis	Carboxypeptidase	Peptidase S10, serine carboxypeptidase; Serine carboxypeptidase, serine active site; Alpha/Beta hydrolase fold
TraesCS1D01G333900	1D	423 863 588 .. 423 856 897 (-)	6691	G	MF: translation initiation factor activity; MF: GTPase activity; MF: GTP binding; CC: intracellular; BP: translational initiation	Translation initiation factor IF-2	Translation initiation factor aIF-2, bacterial-like; Transcription factor, GTP-binding domain; IPR005225: Small GTP-binding protein domain; Translation protein, beta-barrel domain; Translation initiation factor IF- 2, domain 3; P-loop containing nucleoside triphosphate hydrolase
TraesCS1D01G334000	1D	423 881 990 .. 423 882 890 (+)	900	G		2-oxoglutarate (2OG) and Fe(II)-dependent oxygenase superfamily protein	Non-haem dioxygenase N-terminal domain; Isopenicillin N synthase-like
TraesCS1D01G334200	1D	423 923 844 .. 423 919 254 (-)	4590	G	CC: integral component of membrane	Transmembrane protein 56	TRAM/LAG1/CLN8 homology domain
TraesCS1D01G334300	1D	423 929 140 .. 423 926 564 (-)	2576	TE?	MF: protein binding	F-box family protein	F-box domain; Leucine-rich repeat domain, L domain-like
TraesCS1D01G334400	1D	424 728 000 .. 424 731 312 (+)	3312	G		Cellulose synthase	Nucleotide-diphospho-sugar transferases
TraesCS1D01G334500	1D	424 733 214 .. 424 733 612 (+)	398	G		Glutathione S-transferase T3
TraesCS1D01G334600	1D	424 743 638 .. 424 736 493 (-)	7145	G		BSD domain containing protein	BSD domain
TraesCS1D01G334700	1D	424 867 891 .. 424 868 421 (+)	530	G		sequence-specific DNA binding transcription factor ATNDX
TraesCS1D01G334800	1D	424 987 031 .. 424 990 036 (+)	3005	G		Lysine--trna ligase	Metallo-beta-lactamase; Protein of unknown function DUF4336
TraesCS1D01G334900	1D	424 992 317 .. 424 991 537 (-)	780	G		Clavata3/ESR (CLE) gene family member
TraesCS1D01G335000	1D	425 039 098 .. 425 037 307 (-)	1791	G	MF: chaperone binding	BAG family molecular chaperone regulator 8, chloroplastic	BAG domain
TraesCS1D01G335100	1D	425 047 512 .. 425 042 967 (-)	4545	G	CC: nucleus; BP: regulation of transcription, DNA-templated; CC: H4/H2A histone acetyltransferase complex	Chromatin modification-related protein EAF7	Chromatin modification-related protein Eaf7/MRGBP
TraesCS1D01G335200	1D	425 053 845 .. 425 056 367 (+)	2522	G		Glucan endo-1,3-beta-glucosidase 1	X8 domain
TraesCS1D01G335300	1D	425 299 621 .. 425 300 562 (+)	941	G		TCP family transcription factor containing protein	Transcription factor, TCP; Transcription factor TCP subgroup
TraesCS1D01G335400	1D	425 568 811 .. 425 574 047 (+)	5236	G	MF: nucleotide binding; MF: calcium-transporting ATPase activity; MF: ATP binding; CC: membrane; CC: integral component of membrane; MF: metal ion binding; BP: calcium ion transmembrane transport	Calcium-transporting ATPase	P-type ATPase; Cation-transporting P-type ATPase, N-terminal; Cation-transporting P-type ATPase, C-terminal; P-type ATPase, subfamily IIB; P-type ATPase, A domain; P-type ATPase, phosphorylation site; HAD-like domain; P-type ATPase, transmembrane domain; P-type ATPase, cytoplasmic domain N
TraesCS1D01G335500	1D	425 672 166 .. 425 675 868 (+)	3702	G	MF: nucleotide binding; MF: calcium-transporting ATPase activity; MF: ATP binding; CC: membrane; CC: integral component of membrane; MF: metal ion binding; BP: calcium ion transmembrane transport	Calcium-transporting ATPase	P-type ATPase; Cation-transporting P-type ATPase, N-terminal; Cation-transporting P-type ATPase, C-terminal; P-type ATPase, subfamily IIB; P-type ATPase, A domain; P-type ATPase, phosphorylation site; HAD-like domain; P-type ATPase, transmembrane domain; P-type ATPase, cytoplasmic domain N
TraesCS1D01G335600	1D	425 925 967 .. 425 925 479 (-)	488	G		glucoside glucohydrolase 2
TraesCS1D01G335700	1D	426 161 567 .. 426 166 817 (+)	5250	G		Mitochondrial import inner membrane translocase subunit TIM50	FCP1 homology domain; HAD-like domain
TraesCS1D01G335800	1D	426 167 879 .. 426 171 308 (+)	3429	G	BP: mRNA 3'-end processing	Cleavage stimulation factor subunit	Transcription termination and cleavage factor, C-terminal domain
TraesCS1D01G335900	1D	426 174 580 .. 426 178 323 (+)	3743	G	MF: magnesium ion transmembrane transporter activity; BP: magnesium ion transport; CC: integral component of membrane	magnesium transporter NIPA (DUF803)	Magnesium transporter NIPA
TraesCS1D01G336000	1D	426 180 034 .. 426 181 449 (+)	1415	G	MF: structural constituent of ribosome; CC: intracellular; CC: ribosome; BP: translation	50S ribosomal protein L33	Ribosomal protein L33; Zinc-binding ribosomal protein; Ribosomal protein L33, conserved site
TraesCS1D01G336100	1D	426 183 689 .. 426 181 734 (-)	1955	G		Glycosyltransferase	Nucleotide-diphospho-sugar transferase
QGpc.ippg-2A
TraesCS2A01G288700	2A	496 562 803 .. 496 563 591 (+)	788	G	MF: DNA binding; MF: transcription factor activity, sequence-specific DNA binding; BP: regulation of transcription, DNA-templated	Ethylene-responsive transcription factor, putative	AP2/ERF domain; IPR016177: DNA-binding domain
TraesCS2A01G288800	2A	496 590 281 .. 496 588 464 (-)	1817	G		Heavy metal transport/detoxification superfamily protein
TraesCS2A01G288900	2A	497 015 025 .. 497 013 489 (-)	1536	G		Heavy metal transport/detoxification superfamily protein
TraesCS2A01G289000	2A	497 436 374 .. 497 437 536 (+)	1162	TE?		GRF zinc finger / Zinc knuckle protein
TraesCS2A01G289100	2A	497 439 181 .. 497 440 590 (+)	1409	G	MF: protein binding	Pentatricopeptide repeat-containing protein	Pentatricopeptide repeat; Tetratricopeptide-like helical domain
TraesCS2A01G289200	2A	497 452 903 .. 497 439 698 (-)	13205	G		5'-AMP-activated protein kinase subunit beta	CBS domain; Immunoglobulin-like fold; Immunoglobulin E-set; AMP-activated protein kinase, glycogen-binding domain
TraesCS2A01G289300	2A	497 657 341 .. 497 652 197 (-)	5144	G	MF: potassium ion transmembrane transporter activity; CC: membrane; BP: potassium ion transmembrane transport	Potassium transporter	Potassium transporter
TraesCS2A01G289400	2A	498 042 127 .. 498 044 136 (+)	2009	G	MF: potassium ion transmembrane transporter activity; CC: membrane; BP: potassium ion transmembrane transport	Potassium transporter	Potassium transporter
TraesCS2A01G289500	2A	498 086 280 .. 498 089 141 (+)	2861	TE?	MF: nucleic acid binding	Zinc finger protein	Zinc finger, RING/FYVE/PHD-type; Zinc finger C2H2-type
TraesCS2A01G289600	2A	498 093 737 .. 498 090 127 (-)	3610	G		DNA cross-link repair protein	Metallo-beta-lactamase; DNA repair metallo-beta-lactamase
TraesCS2A01G289700	2A	498 104 405 .. 498 098 178 (-)	6227	G	MF: nucleic acid binding; CC: nucleus; BP: DNA repair; MF: phosphoric diester hydrolase activity; MF: zinc ion binding; MF: hydrolase activity, acting on acid anhydrides, in phosphorus-containing anhydrides	Tyrosyl-DNA phosphodiesterase 1	Tyrosyl-DNA phosphodiesterase I; HIRAN domain; Tyrosyl-DNA phosphodiesterase C-terminal domain
TraesCS2A01G289800	2A	498 107 629 .. 498 104 683 (-)	2946	G	MF: alpha-amylase activity MF: calcium ion binding; BP: carbohydrate metabolic process	Alpha-amylase	Alpha-amylase, C-terminal beta-sheet; Glycoside hydrolase superfamily
TraesCS2A01G289800	2A	498 109 141 .. 498 104 683 (-)	4458	G	MF: catalytic activity; MF: alpha-amylase activity; MF: calcium ion binding; BP: carbohydrate metabolic process	Alpha-amylase	Glycosyl hydrolase, family 13, catalytic domain; Alpha-amylase, C-terminal beta-sheet; Alpha-amylase, plant; IPR017853: Glycoside hydrolase superfamily
TraesCS2A01G289900	2A	498 109 859 .. 498 109 446 (-)	413	TE	MF: nucleic acid binding	Polynucleotidyl transferase, ribonuclease H-like superfamily protein	Ribonuclease H-like domain
TraesCS2A01G290000	2A	498 841 901 .. 498 840 212 (-)	1689	G		SBP (S-ribonuclease-binding protein) family protein, putative	Zinc finger, C3HC4 type (RING finger)
TraesCS2A01G290100	2A	499 578 683 .. 499 580 316 (+)	1633	G	MF: protein binding; MF: zinc ion binding	SBP (S-ribonuclease binding protein) family protein	Zinc finger, RING-type
QGpc.ippg-2B.1
TraesCS2B01G453000	2B	646 954 449 .. 646 959 734 (+)	5285	G		Ubiquitin-specific protease family C19-related protein
TraesCS2B01G453100	2B	646 972 275 .. 646 976 168 (+)	3893	G		Ubiquitin-specific protease family C19 protein
TraesCS2B01G453300	2B	647 100 766 .. 647 109 353 (+)	8587	G	MF: DNA binding; MF: DNA ligase activity; MF: DNA ligase (ATP) activity; MF: ATP binding; BP: DNA repair; BP: DNA recombination; BP: DNA ligation involved in DNA repair;BP: DNA biosynthetic process	DNA ligase	DNA ligase, ATP-dependent; BRCT domain; DNA ligase, ATP-dependent, N-terminal; DNA ligase, ATP-dependent, C-terminal; DNA ligase, ATP-dependent, central; Nucleic acid-binding, OB-fold; DNA ligase, ATP-dependent, conserved site; DNA ligase IV domain
TraesCS2B01G453400	2B	647 109 397 .. 647 116 149 (+)	6752	G		ELKS/Rab6-interacting/CAST family protein
TraesCS2B01G453500	2B	647 308 923 .. 647 317 348 (+)	8425	G	MF: mannosyl-oligosaccharide 1,2-alpha-mannosidase activity; MF: calcium ion binding; CC: membrane	alpha-1,2-Mannosidase	Glycoside hydrolase family 47
TraesCS2B01G453600	2B	647 451 070 .. 647 451 267 (+)	197	G		DNA ligase
TraesCS2B01G453700	2B	647 539 053 .. 647 539 283 (+)	230	G		30S ribosomal protein S10
TraesCS2B01G453800	2B	647 603 752 .. 647 604 436 (+)	684	G		30S ribosomal protein S10
TraesCS2B01G453900	2B	647 743 663 .. 647 741 271 (-)	2392	G		60S ribosomal protein L7	Ribosomal protein L7, eukaryotic; Ribosomal protein L30, N-terminal; Ribosomal protein L30, ferredoxin-like fold domain; Ribosomal protein L30, conserved site
TraesCS2B01G454000	2B	648 073 433 .. 648 085 027 (+)	11594	G	MF: nucleotide binding; MF: calcium-transporting ATPase activity; MF: calmodulin binding; MF: ATP binding; CC: membrane; CC: integral component of membrane; MF: metal ion binding; BP: calcium ion transmembrane transport	Calcium-transporting ATPase	P-type ATPase; Cation-transporting P-type ATPase, N-terminal; Cation-transporting P-type ATPase, C-terminal; P-type ATPase, subfamily IIB; P-type ATPase, A domain; P-type ATPase, phosphorylation site; HAD-like domain; P-type ATPase, transmembrane domain; P-type ATPase, cytoplasmic domain N; Calcium-transporting P-type ATPase, N-terminal autoinhibitory domain
TraesCS2B01G454100	2B	648 479 661 .. 648 483 203 (+)	3542	G	MF: protein binding	Leucine-rich repeat (LRR) family protein	Leucine-rich repeat; Leucine-rich repeat, typical subtype; Leucine-rich repeat domain, L domain-like
TraesCS2B01G454200	2B	648 485 060 .. 648 483 652 (-)	1408	G	MF: aminoacyl-tRNA hydrolase activity	Peptidyl-tRNA hydrolase II family protein	Peptidyl-tRNA hydrolase, PTH2; Peptidyl-tRNA hydrolase II domain
TraesCS2B01G454300	2B	648 653 888 .. 648 652 525 (-)	1363	G	MF: transcription factor activity, sequence-specific DNA binding; BP: regulation of transcription, DNA-templated; MF: sequence-specific DNA binding	WRKY transcription factor	WRKY domain; Zn-cluster domain
TraesCS2B01G454400	2B	648 931 516 .. 648 930 133 (-)	1383	G		Late embryogenesis abundant protein	Root cap
TraesCS2B01G454500	2B	649 475 798 .. 649 478 584 (+)	2786	G	MF: hydrolase activity, hydrolyzing O-glycosyl compounds; CC: cell wall; BP: carbohydrate metabolic process; BP: cellular glucan metabolic process; BP: xyloglucan metabolic process; MF: xyloglucan:xyloglucosyl transferase activity; BP: cell wall biogenesis; CC: apoplast	Xyloglucan endotransglucosylase/hydrolase	Glycoside hydrolase family 16; Glycoside hydrolase, family 16, active site; Xyloglucan endo-transglycosylase, C-terminal; Concanavalin A-like lectin/glucanase domain; Xyloglucan endotransglucosylase/hydrolase
TraesCS2B01G454600	2B	649 480 859 .. 649 479 177 (-)	1682	G	MF: hydrolase activity, hydrolyzing O-glycosyl compounds; CC: cell wall; BP: carbohydrate metabolic process; BP: cellular glucan metabolic process; BP: xyloglucan metabolic process; MF: xyloglucan:xyloglucosyl transferase activity; BP: cell wall biogenesis; CC: apoplast	Xyloglucan endotransglucosylase/hydrolase	Glycoside hydrolase family 16; Glycoside hydrolase, family 16, active site; Xyloglucan endo-transglycosylase, C-terminal; Concanavalin A-like lectin/glucanase domain; Xyloglucan endotransglucosylase/hydrolase
TraesCS2B01G454700	2B	649 656 461 .. 649 656 198 (-)	263	G		Pyridoxine/pyridoxamine 5'-phosphate oxidase
TraesCS2B01G454800	2B	649 669 741 .. 649 672 127 (+)	2386	G	MF: hydrolase activity, hydrolyzing O-glycosyl compounds;GO: CC: cell wall; BP: carbohydrate metabolic process; BP: cellular glucan metabolic process; BP: xyloglucan metabolic process; MF: xyloglucan:xyloglucosyl transferase activity; BP: cell wall biogenesis; CC: apoplast	Xyloglucan endotransglucosylase/hydrolase	Glycoside hydrolase family 16; Glycoside hydrolase, family 16, active site; Beta-glucanase; Xyloglucan endo-transglycosylase, C-terminal; Concanavalin A-like lectin/glucanase domain; Xyloglucan endotransglucosylase/hydrolase
TraesCS2B01G454900	2B	649 708 239 .. 649 707 601 (-)	638	G		Vacuolar iron transporter-like protein	Ccc1 family
TraesCS2B01G455000	2B	649 714 070 .. 649 713 522 (-)	548	G		Vacuolar iron transporter	Ccc1 family
TraesCS2B01G455100	2B	649 750 314 .. 649 749 416 (-)	898	G		Vacuolar iron transporter	Ccc1 family
TraesCS2B01G455200	2B	649 756 203 .. 649 755 289 (-)	914	G		Vacuolar iron transporter	Ccc1 family
TraesCS2B01G455300	2B	649 947 204 .. 649 946 299 (-)	905	G		Vacuolar iron transporter-like protein	Ccc1 family
TraesCS2B01G455400	2B	649 974 714 .. 649 976 031 (+)	1317	G	MF: hydrolase activity, hydrolyzing O-glycosyl compounds; CC: cell wall; BP: carbohydrate metabolic process; BP: cellular glucan metabolic process; BP: xyloglucan metabolic process; MF: xyloglucan:xyloglucosyl transferase activity; BP: cell wall biogenesis;GO: CC: apoplast	Xyloglucan endotransglucosylase/hydrolase	Glycoside hydrolase family 16; Glycoside hydrolase, family 16, active site; Xyloglucan endo-transglycosylase, C-terminal; Concanavalin A-like lectin/glucanase domain; Xyloglucan endotransglucosylase/hydrolase
TraesCS2B01G455500	2B	650 164 651 .. 650 165 049 (+)	398	G		VQ motif family protein	VQ
TraesCS2B01G455600	2B	650 168 887 .. 650 167 478 (-)	1409	G		DNA-directed RNA polymerase subunit
TraesCS2B01G455700	2B	650 279 063 .. 650 287 540 (+)	8477	G	MF: actin binding; BP: cytoskeleton organization	Villin	Villin headpiece; Villin/Gelsolin; Gelsolin-like domain; ADF-H/Gelsolin-like domain
TraesCS2B01G455800	2B	650 353 149 .. 650 354 975 (+)	1826	G		HTH-type transcriptional regulator YidZ	Domain of unknown function DUF642; Galactose-binding domain-like
TraesCS2B01G455900	2B	650 399 573 .. 650 405 456 (+)	5883	G		Plastid-lipid associated protein PAP/fibrillin family-like	Plastid lipid-associated protein/fibrillin conserved domain
TraesCS2B01G456000	2B	650 482 342 .. 650 486 109 (+)	3767	G		Leucine-rich repeat protein kinase family protein
TraesCS2B01G456100	2B	650 789 377 .. 650 791 283 (+)	1906	G	MF: protein binding; MF: zinc ion binding	RING/U-box superfamily protein	Zinc finger, RING-type; Zinc finger, RING/FYVE/PHD-type
TraesCS2B01G456200	2B	650 797 434 .. 650 792 205 (-)	2229	G	MF: catalytic activity; BP: carbohydrate metabolic process; MF: isomerase activity; MF: carbohydrate binding	Aldose 1-epimerase family protein	Aldose 1-/Glucose-6-phosphate 1-epimerase; Galactose mutarotase-like domain; Glycoside hydrolase-type carbohydrate-binding; Glucose-6-phosphate 1-epimerase
TraesCS2B01G456300	2B	651 071 789 .. 651 067 689 (-)	4100	G	MF: protein C-terminal S-isoprenylcysteine carboxyl O-methyltransferase activity; CC: endoplasmic reticulum; BP: C-terminal protein methylation; CC: integral component of membrane	Protein-S-isoprenylcysteine O-methyltransferase	Isoprenylcysteine carboxyl methyltransferase; Protein-S-isoprenylcysteine O-methyltransferase
TraesCS2B01G456400	2B	651 350 442 .. 651 359 352 (+)	8910	G	MF: protein kinase activity; MF: ATP binding; BP: protein phosphorylation	Kinase family protein	Protein kinase domain; Serine/threonine-protein kinase, active site; Protein kinase-like domain; Protein kinase, ATP binding site
TraesCS2B01G456500	2B	651 359 616 .. 651 362 522 (+)	2906	G	MF: nucleic acid binding; MF: oxidoreductase activity; BP: oxidation-reduction process	RNA-binding (RRM/RBD/RNP motifs) family protein	RNA recognition motif domain; Oxoglutarate/iron-dependent dioxygenase; Alpha-ketoglutarate-dependent dioxygenase AlkB-like
TraesCS2B01G456600	2B	651 365 828 .. 651 362 898 (-)	2930	G	MF: protein binding	Pentatricopeptide repeat-containing protein	Pentatricopeptide repeat; Tetratricopeptide-like helical domain
TraesCS2B01G456700	2B	651 554 252 .. 651 557 192 (+)	2940	G	MF: hydrolase activity, acting on ester bonds	GDSL esterase/lipase	GDSL lipase/esterase; SGNH hydrolase-type esterase domain
TraesCS2B01G456800	2B	651 725 304 .. 651 726 407 (+)	1103	G		Serine/threonine-protein kinase ULK4
TraesCS2B01G456900	2B	651 731 884 .. 651 730 370 (-)	1514	G		Pollen Ole e 1 allergen/extensin	Pollen proteins Ole e I like
TraesCS2B01G457000	2B	651 736 834 .. 651 733 831 (-)	3003	G	MF: hydrolase activity	Pectin acetylesterase	Pectinacetylesterase/NOTUM; Alpha/Beta hydrolase fold
TraesCS2B01G457100	2B	651 920 784 .. 651 924 782 (+)	3998	G		Maltose excess protein 1-like, chloroplastic
TraesCS2B01G457200	2B	651 925 266 .. 651 927 781 (+)	2515	G		Trihelix transcription factor GT-like protein	Myb-like domain
TraesCS2B01G457300	2B	651 929 889 .. 651 932 791 (+)	2902	G	BP: polyamine transport; MF: polyamine binding; CC: periplasmic space	Putrescine-binding periplasmic protein	Bacterial periplasmic spermidine/putrescine-binding protein
TraesCS2B01G457400	2B	651 935 107 .. 651 932 204 (-)	2903	ТЕ?	MF: protein binding	F-box family protein	F-box domain; Leucine-rich repeat domain, L domain-like
QGpc.ippg-2B.2
TraesCS2B01G532900	2B	729 137 065 .. 729 132 686 (-)	4379	G	MF: protein kinase activity; MF: ATP binding; BP: protein phosphorylation	Receptor-like kinase	Protein kinase domain; Serine-threonine/tyrosine-protein kinase, catalytic domain; Serine/threonine-protein kinase, active site; Protein kinase-like domain; Protein kinase, ATP binding site
TraesCS2B01G533000	2B	729 140 321 .. 729 140 870 (+)	549	G		Homeodomain-like superfamily protein
TraesCS2B01G533100	2B	729 181 013 .. 729 180 229 (-)	784	G		Carboxyl-terminal-processing protease
TraesCS2B01G533200	2B	729 524 984 .. 729 528 230 (+)	3246	G	MF: iron ion binding; MF: oxidoreductase activity, acting on paired donors, with incorporation or reduction of molecular oxygen; MF: heme binding; BP: oxidation-reduction process	Cytochrome P450-like	Cytochrome P450; Cytochrome P450, E-class, group I; Cytochrome P450, conserved site
TraesCS2B01G533300	2B	729 627 351 .. 729 630 308 (+)	2957	G	CC: integral component of plasma membrane; MF: sucrose transmembrane transporter activity; BP: sucrose transport	Sucrose transporter	Sucrose/H+ symporter, plant; Major facilitator superfamily domain
TraesCS2B01G533400	2B	729 764 907 .. 729 771 410 (+)	6503	G	MF: protein kinase activity; MF: protein serine/threonine kinase activity; MF: ATP binding; BP: protein phosphorylation; BP: recognition of pollen	Serine/threonine-protein kinase	Protein kinase domain; S-locus glycoprotein domain; Bulb-type lectin domain; PAN/Apple domain; Serine/threonine-protein kinase, active site; Protein kinase-like domain; Protein kinase, ATP binding site; S-receptor-like serine/threonine-protein kinase
TraesCS2B01G533500	2B	729 877 980 .. 729 878 189 (+)	209	G		Sulfhydryl oxidase 1
TraesCS2B01G533600	2B	729 902 592 .. 729 896 836 (-)	5756	G	MF: magnesium ion binding; BP: metabolic process; MF: terpene synthase activity; MF: lyase activity	Kaurene synthase	Terpene synthase, N-terminal domain; Terpene synthase, metal-binding domain; Terpenoid cyclases/protein prenyltransferase alpha-alpha toroid; Isoprenoid synthase domain
TraesCS2B01G533700	2B	729 956 496 .. 729 958 232 (+)	1736	G	CC: membrane; CC: integral component of membrane	WAT1-related protein	EamA domain
TraesCS2B01G533800	2B	730 083 075 .. 730 079 440 (-)	3635	G	MF: zinc ion transmembrane transporter activity; CC: membrane; CC: integral component of membrane; BP: metal ion transport; MF: metal ion transmembrane transporter activity; BP: transmembrane transport; BP: zinc II ion transmembrane transport	Zinc transporter	Zinc/iron permease; Zinc/iron permease, fungal/plant
QGpc.ippg-2D
TraesCS2D01G099800	2D	52 025 675 .. 52 023 830 (-)	1845	G		Alpha/beta-hydrolase superfamily protein	Alpha/beta hydrolase fold-1; Alpha/Beta hydrolase fold
TraesCS2D01G099900	2D	52 041 230 .. 52 043 832 (+)	2602	G	CC: cell wall;9 MF: pectinesterase activity; BP: cell wall modification	Pectinesterase	Pectinesterase, catalytic; Pectin lyase fold/virulence factor; Pectin lyase fold; Pectinesterase, Asp active site
TraesCS2D01G100000	2D	52 047 663 .. 52 061 164 (+)	13501	G	MF: protein binding	Myb family transcription factor APL	WD40/YVTN repeat-like-containing domain
TraesCS2D01G100100	2D	52 063 029 .. 52 065 352 (+)	2323	G	MF: DNA binding	Myb family transcription factor APL	SANT/Myb domain; Myb domain, plants; Homeobox domain-like; Myb domain; MYB-CC type transcription factor, LHEQLE-containing domain
TraesCS2D01G100200	2D	52 227 203 .. 52 229 885 (+)	2682	G	MF: DNA binding	WUSCHEL-related homeobox	Homeobox domain; Homeobox domain-like
TraesCS2D01G100300	2D	52 234 913 .. 52 231 309 (-)	3604	THE?	MF: DNA binding; BP: regulation of transcription, DNA-templated	Dof zinc finger protein	Zinc finger, Dof-type
TraesCS2D01G100400	2D	52 432 305 .. 52 432 688 (+)	383	THE		Ribonuclease H-like superfamily protein
TraesCS2D01G100500	2D	52 559 376 .. 52 557 766 (-)	1610	G	BP: cell redox homeostasis	Thioredoxin, putative	Thioredoxin-like fold; Thioredoxin domain
TraesCS2D01G100600	2D	52 646 885 .. 52 648 518 (+)	1633	G	MF: DNA binding; BP: regulation of transcription, DNA-templated	NAC domain protein	NAC domain
TraesCS2D01G100700	2D	52 851 898 .. 52 853 601 (+)	1703	G	MF: DNA binding; BP: regulation of transcription, DNA-templated	NAC domain protein,	NAC domain
TraesCS2D01G100800	2D	52 959 503 .. 52 960 664 (+)	1161	G	MF: DNA binding; BP: regulation of transcription, DNA-templated	NAC domain protein,	NAC domain
TraesCS2D01G100900	2D	53 648 855 .. 53 650 859 (+)	2004	G	MF: DNA binding; BP: regulation of transcription, DNA-templated	NAC domain protein,	NAC domain
TraesCS2D01G101000	2D	54 067 273 .. 54 066 234 (-)	1039	G		Stress responsive protein	Ricin B, lectin domain
TraesCS2D01G101100	2D	54 078 462 .. 54 076 594 (-)	1868	G		Ricin B-like lectin R40G2	Ricin B, lectin domain
TraesCS2D01G101200	2D	54 105 001 .. 54 102 617 (-)	2384	G		Stress responsive protein	Ricin B, lectin domain
TraesCS2D01G101300	2D	54 317 495 .. 54 319 164 (+)	1669	G	MF: DNA binding; BP: regulation of transcription, DNA-templated	NAC domain protein	NAC domain
TraesCS2D01G101400	2D	54 488 083 .. 54 486 128 (-)	1955	G	MF: DNA binding; BP: regulation of transcription, DNA-templated	NAC domain protein	NAC domain
TraesCS2D01G101500	2D	54 677 910 .. 54 670 944 (-)	6966	G	MF: hydrolase activity	Apyrase-like protein	Nucleoside phosphatase GDA1/CD39
TraesCS2D01G101600	2D	54 791 981 .. 54 791 489 (-)	492	THE?		ArfGap/RecO-like zinc finger domain-containing protein
TraesCS2D01G101700	2D	54 868 823 .. 54 872 683 (+)	3860	G		Pro-resilin, putative
TraesCS2D01G101800	2D	55 056 635 .. 55 058 956 (+)	2321	THE?	MF: nucleic acid binding; MF: metal ion binding	RNA-binding domain CCCH-type zinc finger protein	RNA recognition motif domain; Zinc finger, CCCH-type
TraesCS2D01G101900	2D	55 143 508 .. 55 140 177 (-)	3331	G	CC: outer membrane	Sorting and assembly machinery component 50 like	Bacterial surface antigen (D15)
TraesCS2D01G102000	2D	55 152 549 .. 55 151 272 (-)	1277	G	MF: oxidoreductase activity; BP: oxidation-reduction process	NADH-cytochrome b5 reductase	Phenol hydroxylase reductase; Oxidoreductase FAD/NAD(P)-binding; Flavoprotein pyridine nucleotide cytochrome reductase; Ferredoxin reductase-type FAD-binding domain; Riboflavin synthase-like beta-barrel
TraesCS2D01G102100	2D	55 159 382 .. 55 153 230 (-)	6152	G	CC: membrane; MF: cellulose synthase (UDP-forming) activity; BP: cellulose biosynthetic process	Cellulose synthase	Cellulose synthase; Zinc finger, RING/FYVE/PHD-type; Cellulose synthase, RING-type zinc finger; Nucleotide-diphospho-sugar transferases
TraesCS2D01G102200	2D	55 237 252 .. 55 235 623 (-)	1629	G	BP: metal ion transport; MF: metal ion binding	Heavy metal transport/detoxification superfamily protein	Heavy metal-associated domain, HMA; Armadillo-like helical
TraesCS2D01G102300	2D	55 249 842 .. 55 248 643 (-)	1199	G		Cysteine protease
TraesCS2D01G102400	2D	55 256 461 .. 55 255 278 (-)	1183	G		Translation initiation factor IF-2
TraesCS2D01G102500	2D	55 270 114 .. 55 271 426 (+)	1312	G		carboxyl-terminal peptidase (DUF239)	Neprosin
TraesCS2D01G102600	2D	55 315 353 .. 55 316 759 (+)	1406	G		Serpin family protein	Surpin domain
TraesCS2D01G102700	2D	55 357 763 .. 55 356 681 (-)	1082	G		Serpin family protein	Surpin domain
TraesCS2D01G102800	2D	55 400 130 .. 55 391 180 (-)	8950	THE?	MF: nucleotide binding; MF: nucleic acid binding; MF: catalytic activity; MF: ATP binding; CC: intracellular; BP: DNA replication; BP: DNA repair; BP: DNA recombination; MF: ATP-dependent helicase activity; MF: ATP-dependent 3'-5' DNA helicase activity; BP: cellular metabolic process	ATP-dependent RNA helicase DeaD	Helicase, C-terminal; HRDC domain; DNA helicase, ATP-dependent, RecQ type; HRDC-like; DEAD/DEAH box helicase domain; Winged helix-turn-helix DNA-binding domain; Helicase superfamily 1/2, ATP-binding domain; RQC domain; P-loop containing nucleoside triphosphate hydrolase; Helicase Helix-turn-helix domain; ATP-dependent DNA helicase RecQ, zinc-binding domain
TraesCS2D01G102900	2D	55 435 876 .. 55 436 442 (+)	546	G	MF: enzyme inhibitor activity	Pectinesterase inhibitor 2	Pectinesterase inhibitor domain
TraesCS2D01G103000	2D	55 602 132 .. 55 602 940 (+)	808	THE	MF: enzyme inhibitor activity	Retrotransposon protein	Pectinesterase inhibitor domain
TraesCS2D01G103100	2D	55 630 294 .. 55 629 193 (-)	1101	G	MF: peroxidase activity; BP: response to oxidative stress; MF: heme binding; BP: oxidation-reduction process	Peroxidase	Plant peroxidase; Haem peroxidase, plant/fungal/bacterial; Haem peroxidase; Peroxidases heam-ligand binding site; Peroxidase, active site
TraesCS2D01G103200	2D	55 713 474 .. 55 712 158 (-)	1316	G		Polyadenylate-binding protein 1-B-binding protein
TraesCS2D01G103300	2D	55 760 271 .. 55 752 785 (-)	7486	G		Mediator of RNA polymerase II transcription subunit 33A
TraesCS2D01G103400	2D	55 764 839 .. 55 764 264 (-)	575	G	MF: calcium ion binding	Calcium-binding family protein	EF-hand domain; EF-hand domain pair; EF-Hand 1, calcium-binding site
TraesCS2D01G103500	2D	55 928 915 .. 55 931 007 (+)	2092	G		Acid phosphatase 1	Acid phosphatase, class B-like; HAD-like domain
TraesCS2D01G103600	2D	56 070 268 .. 56 073 174 (+)	2906	G	MF: iron ion binding; MF: oxidoreductase activity, acting on paired donors, with incorporation or reduction of molecular oxygen; MF: heme binding; BP: oxidation-reduction process	Cytochrome P450 family protein, expressed	Cytochrome P450; Cytochrome P450, E-class, group I; Cytochrome P450, conserved site
TraesCS2D01G103700	2D	56 077 806 .. 56 074 310 (-)	3496	G		Acid phosphatase 1	Acid phosphatase, class B-like; Vegetative storage protein/acid phosphatase; HAD-like domain
TraesCS2D01G103800	2D	56 102 253 .. 56 107 330 (+)	5077	G	MF: protein kinase activity; MF: protein binding; MF: ATP binding; BP: protein phosphorylation	Receptor-like kinase	Protein kinase domain; Leucine-rich repeat; Leucine-rich repeat, typical subtype; Protein kinase-like domain; Leucine-rich repeat-containing N-terminal, plant-type; Protein kinase, ATP binding site; Leucine-rich repeat domain, L domain-like
TraesCS2D01G103900	2D	56 109 291 .. 56 111 710 (+)	2419	G	MF: translation initiation factor activity; BP: translational initiation	Eukaryotic translation initiation factor 2 subunit beta	Translation initiation factor IF2/IF5; Translation initiation factor IF2/IF5, N-terminal; Translation initiation factor IF2/IF5, zinc-binding
TraesCS2D01G104000	2D	56 113 738 .. 56 114 859 (+)	1121	G		Glutamate--tRNA ligase 2
TraesCS2D01G104100	2D	56 192 896 .. 56 195 961 (+)	3065	THE?	MF: protein binding	F-box family protein	F-box domain
TraesCS2D01G104200	2D	56 202 785 .. 56 200 840 (-)	1945	G	MF: protein kinase activity; MF: protein serine/threonine kinase activity; MF: ATP binding; BP: protein phosphorylation	Protein kinase	Protein kinase domain; AGC-kinase, C-terminal; Serine/threonine-protein kinase, active site; Protein kinase-like domain; Protein kinase, ATP binding site; Protein kinase, C-terminal
TraesCS2D01G104300	2D	56 232 185 .. 56 235 547 (+)	3362	G		extra-large G-like protein, putative (DUF3133)	Probable zinc-ribbon domain, plant
TraesCS2D01G104400	2D	56 238 982 .. 56 251 381 (+)	12399	G	MF: protein binding; MF: ATP binding; MF: zinc ion binding	E3 ubiquitin-protein ligase SHPRH	SNF2-related, N-terminal domain; Helicase, C-terminal; Zinc finger, RING-type; Zinc finger, PHD-type; Zinc finger, FYVE/PHD-type; Tetratricopeptide-like helical domain; Zinc finger, RING/FYVE/PHD-type; Helicase superfamily 1/2, ATP-binding domain; Zinc finger, PHD-type, conserved site; P-loop containing nucleoside triphosphate hydrolase
TraesCS2D01G104500	2D	56 253 779 .. 56 256 115 (+)	2336	G	MF: transcription factor activity, sequence-specific DNA binding; BP: regulation of transcription, DNA-templated; MF: sequence-specific DNA binding	WRKY transcription factor	WRKY domain
TraesCS2D01G104600	2D	56 297 881 .. 56 299 883 (+)	2002	G	MF: transcription factor activity, sequence-specific DNA binding; BP: regulation of transcription, DNA-templated; MF: sequence-specific DNA binding	WRKY transcription factor	WRKY domain
TraesCS2D01G104700	2D	56 445 845 .. 56 447 647 (+)	1802	G	MF: transcription factor activity, sequence-specific DNA binding; BP: regulation of transcription, DNA-templated; MF: sequence-specific DNA binding	WRKY transcription factor	WRKY domain
TraesCS2D01G104800	2D	56 530 566 .. 56 531 566 (+)	1000	G	CC: extracellular region; BP: sexual reproduction	expanding protein	Major pollen allergen Lol pI; Expansin/pollen allergen, DPBB domain; Expansin, cellulose-binding-like domain; Expansin/Lol pI; RlpA-like protein, double-psi beta-barrel domain
TraesCS2D01G104900	2D	56 533 821 .. 56 540 457 (+)	6636	G	MF: RNA binding; MF: tRNA (guanine-N2-)-methyltransferase activity;3 BP: tRNA processing	tRNA (Guanine(26)-N(2))-dimethyltransferase	tRNA methyltransferase, Trm1; S-adenosyl-L-methionine-dependent methyltransferase
TraesCS2D01G105000	2D	56 575 579 .. 56 577 875 (+)	2296	G		Ubiquinol-cytochrome c reductase complex 6.7 kDa protein
TraesCS2D01G105100	2D	56 578 453 .. 56 584 343 (+)	5890	G	MF: calcium ion binding	Vacuolar sorting receptor family protein	PA domain; EGF-like calcium-binding, conserved site
TraesCS2D01G105200	2D	56 588 899 .. 56 589 448 (+)	549	THE		Transposon protein, putative, CACTA, En/Spm sub-class
TraesCS2D01G105300	2D	56 639 691 .. 56 646 412 (+)	6730	G	MF: DNA binding; MF: zinc ion binding	B3 domain transcription factor	B3 DNA binding domain; Zinc finger, CW-type; DNA-binding pseudobarrel domain
TraesCS2D01G105400	2D	56 795 732 .. 56 800 338 (+)	4606	G	MF: transcription factor activity, sequence-specific DNA binding; BP: regulation of transcription, DNA-templated; MF: sequence-specific DNA binding	Transcription factor	Basic-leucine zipper domain
TraesCS2D01G105500	2D	57 114 296 .. 57 106 889 (-)	7407	G	MF: catalytic activity; MF: hydrolase activity, hydrolyzing O-glycosyl compounds; BP: carbohydrate metabolic process	Alpha-galactosidase	Glycoside hydrolase, family 27; Aldolase-type TIM barrel; Glycoside hydrolase superfamily
TraesCS2D01G105600	2D	57 147 623 .. 57 146 394 (-)	1229	G		transcription repressor	Ovate protein family, C-terminal
TraesCS2D01G105700	2D	57 163 864 .. 57 165 993 (+)	2129	G	CC: Arp2/3 protein complex; CC: actin cytoskeleton; BP: regulation of actin filament polymerization; BP: Arp2/3 complex-mediated actin nucleation	Actin-related protein 2/3 complex subunit 5	Actin-related protein 2/3 complex subunit 5
TraesCS2D01G105800	2D	57 168 196 .. 57 167 912 (-)	284	G		Protein kinase
TraesCS2D01G105900	2D	57 259 253 .. 57 257 672 (-)	1581	G	MF: protein kinase activity; MF: ATP binding; BP: protein phosphorylation	Receptor-like kinase	Protein kinase domain; Serine/threonine-protein kinase, active site; Protein kinase-like domain; Protein kinase, ATP binding site
TraesCS2D01G106000	2D	57 264 904 .. 57 265 728 (+)	824	G		Transcription repressor ofp17	Ovate protein family, C-terminal
TraesCS2D01G106100	2D	57 361 432 .. 57 359 926 (-)	1506	G		F-box domain containing protein	FBD domain
TraesCS2D01G106200	2D	58 638 899 .. 58 640 099 (+)	1200	G		Cysteine proteinase
TraesCS2D01G106300	2D	58 656 108 .. 58 651 015 (-)	5093	G	MF: thiamine diphosphokinase activity; MF: ATP binding; BP: thiamine metabolic process; BP: thiamine diphosphate biosynthetic process; MF: thiamine binding	Thiamin pyrophosphokinase 1	Thiamin pyrophosphokinase; Thiamin pyrophosphokinase, catalytic domain; Thiamin pyrophosphokinase, vitamin B1-binding domain; Thiamin pyrophosphokinase, eukaryotic
TraesCS2D01G106400	2D	58 664 456 .. 58 663 635 (-)	821	G		B12D protein	NADH-ubiquinone reductase complex 1 MLRQ subunit
TraesCS2D01G106500	2D	58 731 396 .. 58 733 250 (+)	1854	THE?	MF: protein binding	F-box protein	F-box domain; FBD domain; Leucine-rich repeat domain, L domain-like
TraesCS2D01G106600	2D	58 777 176 .. 58 781 472 (+)	4296	G	MF: potassium ion transmembrane transporter activity; CC: membrane; BP: potassium ion transmembrane transport	Potassium transporter	Potassium transporter
TraesCS2D01G106700	2D	58 810 185 .. 58 809 129 (-)	1056	G		Kynureninase
TraesCS2D01G106800	2D	59 005 695 .. 59 009 533 (+)	3838	G	MF: protein kinase activity; MF: ATP binding; BP: protein phosphorylation; BP: signal transduction	Non-specific serine/threonine protein kinase	Protein kinase domain; NAF domain; Serine/threonine-protein kinase, active site; Protein kinase-like domain; Protein kinase, ATP binding site; NAF/FISL domain
TraesCS2D01G106900	2D	59 164 619 .. 59 164 155 (-)	464	G	BP: signal transduction	Non-specific serine/threonine protein kinase	NAF domain; NAF/FISL domain
TraesCS2D01G107000	2D	59 449 461 .. 59 448 425 (-)	1036	THE?		Serine/threonine protein phosphatase 7 long form isogeny	Aminotransferase-like, plant mobile domain
TraesCS2D01G107100	2D	59 453 054 .. 59 450 417 (-)	2637	G	MF: protein kinase activity; MF: ATP binding; BP: protein phosphorylation; BP: signal transduction	Non-specific serine/threonine protein kinase	Protein kinase domain; NAF domain; Serine/threonine-protein kinase, active site; Protein kinase-like domain; Protein kinase, ATP binding site; NAF/FISL domain
TraesCS2D01G107200	2D	59 553 381 .. 59 550 765 (-)	2616	G		WEAK movement UNDER BLUE LIGHT-like protein	WEB family
TraesCS2D01G107300	2D	59 626 916 .. 59 628 588 (+)	1672	G	MF: peroxidase activity; BP: response to oxidative stress; MF: heme binding; BP: oxidation-reduction process	Peroxidase	Plant peroxidase; Haem peroxidase, plant/fungal/bacterial; Haem peroxidase; Peroxidases heam-ligand binding site; Peroxidase, active site
TraesCS2D01G107400	2D	59 657 845 .. 59 659 382 (+)	1537	G	MF: peroxidase activity; BP: response to oxidative stress; MF: heme binding; BP: oxidation-reduction process	Peroxidase	Plant peroxidase; Haem peroxidase, plant/fungal/bacterial; Haem peroxidase; Peroxidases heam-ligand binding site; Peroxidase, active site
TraesCS2D01G107500	2D	59 723 856 .. 59 725 690 (+)	1834	G	MF: peroxidase activity; BP: response to oxidative stress; MF: heme binding; BP: oxidation-reduction process	Peroxidase	Plant peroxidase; Haem peroxidase, plant/fungal/bacterial; Haem peroxidase; Peroxidases heam-ligand binding site; Peroxidase, active site
TraesCS2D01G107600	2D	59 727 020 .. 59 728 494 (+)	1474	G	MF: peroxidase activity; BP: response to oxidative stress; MF: heme binding; BP: oxidation-reduction process	Peroxidase	Plant peroxidase; Haem peroxidase, plant/fungal/bacterial; Haem peroxidase; Peroxidases heam-ligand binding site; Peroxidase, active site
TraesCS2D01G107700	2D	59 881 470 .. 59 882 737 (+)	1267	G	MF: nucleic acid binding; BP: nucleobase-containing compound metabolic process; MF: 3'-5' exonuclease activity	Werner Syndrome-like exonuclease	3'-5' exonuclease domain; Ribonuclease H-like domain
TraesCS2D01G107800	2D	60 016 278 .. 60 014 820 (-)	1458	G	MF: peroxidase activity; BP: response to oxidative stress; MF: heme binding; BP: oxidation-reduction process	Peroxidase	Plant peroxidase; Haem peroxidase, plant/fungal/bacterial; Haem peroxidase; Peroxidases heam-ligand binding site; Peroxidase, active site
TraesCS2D01G107900	2D	60 023 316 .. 60 021 772 (-)	1544	G	MF: peroxidase activity; BP: response to oxidative stress; MF: heme binding; BP: oxidation-reduction process	Peroxidase	Plant peroxidase; Haem peroxidase, plant/fungal/bacterial; Haem peroxidase; Peroxidases heam-ligand binding site; Peroxidase, active site
TraesCS2D01G108000	2D	60 029 220 .. 60 027 062 (-)	2158	G		Heat shock 70 kDa protein	Heat shock protein 70 family; Heat shock protein 70, conserved site; Heat shock protein 70kD, peptide-binding domain; Heat shock protein 70kD, C-terminal domain
TraesCS2D01G108100	2D	60 065 449 .. 60 063 906 (-)	1543	G	MF: peroxidase activity; BP: response to oxidative stress; MF: heme binding; BP: oxidation-reduction process	Peroxidase	Plant peroxidase; Haem peroxidase, plant/fungal/bacterial; Haem peroxidase; Peroxidases heam-ligand binding site; Peroxidase, active site
TraesCS2D01G108200	2D	60 079 509 .. 60 077 807 (-)	1702	G	MF: peroxidase activity; BP: response to oxidative stress; MF: heme binding; BP: oxidation-reduction process	Peroxidase	Plant peroxidase; Haem peroxidase, plant/fungal/bacterial; Haem peroxidase; Peroxidases heam-ligand binding site; Peroxidase, active site
TraesCS2D01G108300	2D	60 108 841 .. 60 107 317 (-)	1524	G	MF: peroxidase activity; BP: response to oxidative stress; MF: heme binding; BP: oxidation-reduction process	Peroxidase	Plant peroxidase; Haem peroxidase, plant/fungal/bacterial; Haem peroxidase; Peroxidases heam-ligand binding site; Peroxidase, active site
TraesCS2D01G108400	2D	60 136 690 .. 60 133 692 (-)	2998	G		nucleolar-like protein
TraesCS2D01G108500	2D	60 139 025 .. 60 137 542 (-)	1483	G	MF: peroxidase activity; BP: response to oxidative stress; MF: heme binding; BP: oxidation-reduction process	Peroxidase	Plant peroxidase; Haem peroxidase, plant/fungal/bacterial; Haem peroxidase; Peroxidases heam-ligand binding site; Peroxidase, active site
TraesCS2D01G108600	2D	60 167 660 .. 60 165 925 (-)	1735	G	MF: peroxidase activity; BP: response to oxidative stress; MF: heme binding; BP: oxidation-reduction process	Peroxidase	Plant peroxidase; Haem peroxidase, plant/fungal/bacterial; Haem peroxidase; Peroxidases heam-ligand binding site; Peroxidase, active site
TraesCS2D01G108700	2D	60 198 651 .. 60 197 455 (-)	1196	G	BP: proteolysis; MF: cysteine-type peptidase activity	Sentrin-specific protease	Ulp1 protease family, C-terminal catalytic domain
TraesCS2D01G108800	2D	60 203 036 .. 60 198 697 (-)	4339	THE		Aminotransferase-like, plant mobile domain-containing protein
TraesCS2D01G108900	2D	60 327 549 .. 60 328 956 (+)	1407	G	MF: protein dimerization activity	BHLH transcription factor	Myc-type, basic helix-loop-helix (bHLH) domain
TraesCS2D01G109000	2D	60 751 731 .. 60 754 333 (+)	2602	G	MF: structural constituent of ribosome; CC: intracellular; CC: ribosome;GO:0006412 BP: translation	Ribosomal protein L19	Ribosomal protein L19/L19e; Ribosomal protein L19/L19e, domain 1; Ribosomal protein L19/L19e, domain 2; Ribosomal protein L19/L19e, domain 3; Ribosomal protein L19/L19e conserved site
TraesCS2D01G109100	2D	60 756 652 .. 60 757 140 (+)	488	G	MF: protein binding; MF: zinc ion binding	Ring finger protein, putative	Zinc finger, RING-type; Zinc finger, RING/FYVE/PHD-type
TraesCS2D01G109200	2D	60 761 188 .. 60 760 217 (-)	971	G		GATA transcription factor-like protein
TraesCS2D01G109300	2D	60 765 779 .. 60 764 893 (-)	886	G	MF: manganese ion binding; MF: nutrient reservoir activity	Germin-like protein 1	Germin; Cupin 1; RmlC-like Cupin domain; RmlC-like Jelly roll fold; Germin, manganese binding site
TraesCS2D01G109400	2D	60 769 072 .. 60 767 609 (-)	1463	G		Aspartic proteinase nepenthesin-2	Aspartic peptidase domain; Xylanase inhibitor, C-terminal; Xylanase inhibitor, N-terminal; Peptidase family A1 domain
TraesCS2D01G109500	2D	60 780 740 .. 60 779 338 (-)	1402	G		Aspartic proteinase nepenthesin-1	Aspartic peptidase domain; Xylanase inhibitor, C-terminal; Xylanase inhibitor, N-terminal; Peptidase family A1 domain
TraesCS2D01G109600	2D	60 785 535 .. 60 784 064 (-)	1471	G		Aspartic proteinase nepenthesin-1	Aspartic peptidase domain; Xylanase inhibitor, C-terminal; Xylanase inhibitor, N-terminal; Peptidase family A1 domain
TraesCS2D01G109700	2D	60 793 254 .. 60 790 400 (-)	2854	G	MF: antioxidant activity; MF: oxidoreductase activity; BP: cell redox homeostasis; BP: oxidation-reduction process	Peroxiredoxin	Alkyl hydroperoxide reductase subunit C/ Thiol specific antioxidant; Thioredoxin-like fold; Thioredoxin domain
TraesCS2D01G109800	2D	60 942 552 .. 60 946 678 (+)	4126	G	MF: enzyme inhibitor activity; CC: cell wall; MF: pectinesterase activity; BP: cell wall modification	Pectinesterase	Pectinesterase, catalytic; Pectinesterase inhibitor domain; Pectin lyase fold/virulence factor; Pectin lyase fold; Pectinesterase, Asp active site
TraesCS2D01G109900	2D	60 954 300 .. 60 942 555 (-)	11745	G	MF: acyl-CoA dehydrogenase activity; BP: metabolic process; MF: oxidoreductase activity, acting on the CH-CH group of donors; MF: flavin adenine dinucleotide binding; BP: oxidation-reduction process	Acyl-CoA dehydrogenase	Aminoglycoside phosphotransferase; Acyl-CoA oxidase/dehydrogenase, central domain; Acyl-CoA dehydrogenase/oxidase C-terminal; Acyl-CoA dehydrogenase/oxidase, N-terminal and middle domain; Protein kinase-like domain; Acyl-CoA dehydrogenase/oxidase, N-terminal
TraesCS2D01G110000	2D	61 021 444 .. 61 022 498 (+)	1054	G	MF: DNA binding; MF: transcription factor activity, sequence-specific DNA binding; BP: regulation of transcription, DNA-templated	Ethylene-responsive transcription factor	AP2/ERF domain; DNA-binding domain
TraesCS2D01G110100	2D	61 024 965 .. 61 022 709 (-)	2256	G	MF: structural constituent of ribosome; CC: intracellular; CC: ribosome; BP: translation	60S ribosomal protein L18	Ribosomal protein L18e/L15P; Ribosomal protein L18e, conserved site
TraesCS2D01G110200	2D	61 235 556 .. 61 231 973 (-)	3583	THE?	MF: protein binding	F-box family protein	F-box domain; Leucine-rich repeat domain, L domain-like
TraesCS2D01G110300	2D	61 243 381 .. 61 241 504 (-)	1877	THE?	MF: protein binding	F-box family protein	F-box domain; Leucine-rich repeat domain, L domain-like
TraesCS2D01G110400	2D	61 272 443 .. 61 272 901 (+)	458	G		S locus-related glycoprotein 1 (SLR1) binding pollen coat protein family
TraesCS2D01G110500	2D	61 300 139 .. 61 300 625 (+)	486	G		Leucine-rich repeat protein kinase family protein
TraesCS2D01G110600	2D	61 312 948 .. 61 312 040 (-)	908	G		Pollen Ole e 1 allergen/extensin
TraesCS2D01G110700	2D	61 319 884 .. 61 315 311 (-)	4573	G	MF: ATP binding; CC: membrane; MF: ATPase activity	ABC transporter G family member	ABC transporter-like; AAA+ ATPase domain; ABC-2 type transporter; ABC transporter, conserved site; P-loop containing nucleoside triphosphate hydrolase
TraesCS2D01G110800	2D	61 348 893 .. 61 340 545 (-)	8348	G	MF: ATP binding; CC: membrane; MF: ATPase activity	ABC transporter G family member	ABC transporter-like; AAA+ ATPase domain; ABC-2 type transporter; ABC transporter, conserved site; P-loop containing nucleoside triphosphate hydrolase
QGpc.ippg-3A.1
TraesCS3A01G084200	3A	54 470 518 .. 54 466 317 (-)	4201	G		Benzoate--CoA ligase, peroxisomal
TraesCS3A01G084300	3A	54 655 350 .. 54 658 564 (+)	3214	G		Snurportin-1
TraesCS3A01G084400	3A	54 660 059 .. 54 658 038 (-)	2021	G	MF: magnesium ion binding; BP: L-methionine salvage from methylthioadenosine; MF: acireductone synthase activity	Enolase-phosphatase E1	HAD-like domain; Enolase-phosphatase E1
TraesCS3A01G084500	3A	54 663 778 .. 54 661 648 (-)	2130	G	MF: metalloendopeptidase activity; BP: proteolysis	Protease HtpX	Peptidase M48
TraesCS3A01G084600	3A	54 669 058 .. 54 666 575 (-)	2483	G	MF: protein binding	Pentatricopeptide repeat-containing protein	Pentatricopeptide repeat; Tetratricopeptide-like helical domain
TraesCS3A01G084700	3A	54 804 477 .. 54 806 509 (+)	2032	G	MF: iron ion binding; MF: oxidoreductase activity, acting on paired donors, with incorporation or reduction of molecular oxygen; MF: heme binding; BP: oxidation-reduction process	Cytochrome P450 family protein	Cytochrome P450; Cytochrome P450, E-class, group I
TraesCS3A01G084800	3A	54 876 034 .. 54 874 740 (-)	1294	G	MF: iron ion binding; MF: oxidoreductase activity, acting on paired donors, with incorporation or reduction of molecular oxygen; MF: heme binding; BP: oxidation-reduction process	Cytochrome P450 family protein	Cytochrome P450; Cytochrome P450, E-class, group I
TraesCS3A01G084900	3A	54 879 410 .. 54 878 375 (-)	1035	G		Transferase, transferring glycosyl groups
TraesCS3A01G085000	3A	54 885 911 .. 54 883 449 (-)	2462	G	MF: protein binding; MF: zinc ion binding	Pentatricopeptide repeat-containing family protein	Pentatricopeptide repeat; Tetratricopeptide-like helical domain; DYW domain
TraesCS3A01G085100	3A	54 937 422 .. 54 937 820 (+)	398	ТЕ		Ribonuclease H-like superfamily protein
TraesCS3A01G085200	3A	54 942 024 .. 54 938 812 (-)	3212	G	MF: ADP binding	Disease resistance protein RPM1	Winged helix-turn-helix DNA-binding domain; P-loop containing nucleoside triphosphate hydrolase; Leucine-rich repeat domain, L domain-like
TraesCS3A01G085300	3A	55 031 174 .. 55 036 148 (+)	4974	G	MF: FMN binding; MF: oxidoreductase activity; BP: oxidation-reduction process	NADPH--cytochrome P450 reductase	Flavodoxin-like; Oxidoreductase FAD/NAD(P)-binding; Flavoprotein pyridine nucleotide cytochrome reductase; FAD-binding, type 1; Flavodoxin/nitric oxide synthase; Ferredoxin reductase-type FAD-binding domain; Riboflavin synthase-like beta-barrel; Flavoprotein-like domain
TraesCS3A01G085400	3A	55 039 862 .. 55 035 634 (-)	4228	G	MF: catalytic activity; MF: carboxy-lyase activity; BP: carboxylic acid metabolic process; MF: pyridoxal phosphate binding	Glutamate decarboxylase	Pyridoxal phosphate-dependent decarboxylase; Pyridoxal phosphate-dependent transferase, major region, subdomain 1; Pyridoxal phosphate-dependent transferase, subdomain 2; Pyridoxal phosphate-dependent transferase
TraesCS3A01G085500	3A	55 049 426 .. 55 045 418 (-)	4008	G		bZIP transcription factor, putative (DUF1664)	Protein of unknown function DUF1664
TraesCS3A01G085600	3A	55 087 702 .. 55 085 818 (-)	1884	G	MF: RNA binding; MF: structural constituent of ribosome; BP: translation; CC: small ribosomal subunit	30S ribosomal protein S7	Ribosomal protein S5/S7; Ribosomal protein S5/S7, eukaryotic/archaeal; Ribosomal protein S7, conserved site; Ribosomal protein S7 domain
TraesCS3A01G085700	3A	55 223 622 .. 55 255 982 (+)	32360	G	MF: catalytic activity; BP: trehalose biosynthetic process	Trehalose 6-phosphate phosphatase	Gnk2-homologous domain; Trehalose-phosphatase; HAD-superfamily hydrolase, subfamily IIB; HAD-like domain
TraesCS3A01G085800	3A	55 483 864 .. 55 484 700 (+)	836	G		Interleukin-4
TraesCS3A01G085900	3A	55 505 452 .. 55 501 921 (-)		G	MF: copper ion binding; MF: oxidoreductase activity; BP: oxidation-reduction process	Monocopper oxidase-like protein SKU5	Multicopper oxidase, type 1; Cupredoxin; Multicopper oxidase, type 2; Multicopper oxidase, type 3
TraesCS3A01G086000	3A	55 562 389 .. 55 558 213 (-)	4176	G	MF: magnesium ion binding; MF: terpene synthase activity; MF: lyase activity	Sesquiterpene synthase	Terpene synthase, metal-binding domain; Isoprenoid synthase domain
TraesCS3A01G086100	3A	55 707 980 .. 55 705 926 (-)	2054	G	MF: iron ion binding; MF: oxidoreductase activity, acting on paired donors, with incorporation or reduction of molecular oxygen; MF: heme binding; BP: oxidation-reduction process	Cytochrome P450	Cytochrome P450; Cytochrome P450, E-class, group I; Cytochrome P450, conserved site
TraesCS3A01G086200	3A	55 716 008 .. 55 719 260 (+)	3252	G		transmembrane protein
TraesCS3A01G086300	3A	55 723 667 .. 55 722 831 (-)	836	G	MF: ADP binding	Disease resistance protein	NB-ARC; Winged helix-turn-helix DNA-binding domain; P-loop containing nucleoside triphosphate hydrolase
TraesCS3A01G086400	3A	55 737 602 .. 55 740 511 (+)	2909	G	MF: nucleic acid binding	R3H domain containing protein	R3H domain; SUZ domain
TraesCS3A01G086500	3A	55 743 110 .. 55 743 857 (+)	747	G	MF: enzyme inhibitor activity	cDNA, clone: J090004K22, full insert sequence	Pectinesterase inhibitor domain
TraesCS3A01G086600	3A	55 841 050 .. 55 841 382 (+)	332	G	MF: cysteine-type endopeptidase inhibitor activity	Cysteine proteinase inhibitor	Cystatin domain
TraesCS3A01G086700	3A	56 133 676 .. 56 140 402 (+)	6726	G	MF: catalytic activity; MF: 3-hydroxyacyl-CoA dehydrogenase activity; BP: fatty acid metabolic process; BP: metabolic process; MF: oxidoreductase activity; BP: oxidation-reduction process	Fatty acid oxidation complex alpha subunit, putative	Crotonase superfamily; 3-hydroxyacyl-CoA dehydrogenase, NAD binding; NAD(P)-binding domain; Enoyl-CoA hydratase/isomerase, conserved site; ClpP/crotonase-like domain
TraesCS3A01G086800	3A	56 145 591 .. 56 141 475 (-)	4116	G	CC: nucleus	Protein AATF	Apoptosis-antagonizing transcription factor, C-terminal; AATF leucine zipper-containing domain
TraesCS3A01G086900	3A	56 218 797 .. 56 215 736 (-)	3061	G	MF: nucleic acid binding; BP: DNA repair; BP: regulation of RNA splicing	Splicing factor	G-patch domain; RNA recognition motif domain; RNA recognition motif domain, eukaryote; Splicing factor, SPF45
TraesCS3A01G087000	3A	56 226 301 .. 56 219 767 (-)	6534	G		TBC1 domain family member	Rab-GTPase-TBC domain
TraesCS3A01G087100	3A	56 230 245 .. 56 226 520 (-)	3725	G	MF: cysteine synthase activity; BP: cysteine biosynthetic process from serine	Cysteine synthase	Cysteine synthase/cystathionine beta-synthase, pyridoxal-phosphate attachment site; Tryptophan synthase beta subunit-like PLP-dependent enzyme; Cysteine synthase; Cysteine synthase CysK
TraesCS3A01G087200	3A	56 389 793 .. 56 389 147 (-)	646	G	MF: DNA binding; MF: transcription factor activity, sequence-specific DNA binding; BP: regulation of transcription, DNA-templated	Ethylene-responsive transcription factor	AP2/ERF domain; DNA-binding domain
TraesCS3A01G087300	3A	56 391 435 .. 56 390 066 (-)	1369	G	MF: oxidoreductase activity; BP: oxidation-reduction process	NADP-dependent alkenal double bond reductase	GroES-like; Alcohol dehydrogenase, C-terminal; NAD(P)-binding domain; Polyketide synthase, enoylreductase domain
TraesCS3A01G087400	3A	56 395 506 .. 56 398 118 (+)	2612	G		Pyrimidine-specific ribonucleoside hydrolase	Inosine/uridine-preferring nucleoside hydrolase domain
TraesCS3A01G087500	3A	56 401 509 .. 56 397 840 (-)	3669	G		AT2G31890-like protein	Armadillo-like helical; RAP domain
TraesCS3A01G087600	3A	56 409 237 .. 56 410 013 (+)	776	TE?	MF: protein binding	F-box family protein	F-box domain; IPR032675: Leucine-rich repeat domain, L domain-like
TraesCS3A01G087700	3A	56 590 829 .. 56 592 085 (+)	1256	G	MF: hydrolase activity, acting on ester bonds	GDSL esterase/lipase	GDSL lipase/esterase
TraesCS3A01G087800	3A	56 668 613 .. 56 676 699 (+)	8086	G	MF: protein binding	Transcription factor GTE9	Bromodomain; NET domain
TraesCS3A01G087900	3A	56 734 766 .. 56 735 470 (+)	704	G	MF: protein binding; MF: zinc ion binding	RING/U-box superfamily protein	Zinc finger, RING-type; Zinc finger, RING/FYVE/PHD-type
TraesCS3A01G088000	3A	56 762 904 .. 56 764 820 (+)	1916	G	MF: protein binding	Leucine-rich repeat receptor-like protein kinase family protein	Leucine-rich repeat; Leucine-rich repeat, typical subtype; Leucine-rich repeat-containing N-terminal, plant-type; Leucine-rich repeat domain, L domain-like
TraesCS3A01G088100	3A	56 765 030 .. 56 766 159 (+)	1129	G	MF: protein kinase activity; MF: ATP binding; BP: protein phosphorylation	Receptor-kinase, putative	Protein kinase domain; Serine/threonine-protein kinase, active site; Protein kinase-like domain; Protein kinase, ATP binding site
TraesCS3A01G088200	3A	56 776 222 .. 56 776 425 (+)	203	G	MF: serine-type endopeptidase inhibitor activity; BP: response to wounding	Chymotrypsin inhibitor	Proteinase inhibitor I13, potato inhibitor I
TraesCS3A01G088300	3A	56 778 942 .. 56 779 145 (+)	203	G	MF: serine-type endopeptidase inhibitor activity; BP: response to wounding	Chymotrypsin inhibitor	Proteinase inhibitor I13, potato inhibitor I
TraesCS3A01G088400	3A	56 850 923 .. 56 851 126 (+)	203	G	MF: serine-type endopeptidase inhibitor activity; BP: response to wounding	Chymotrypsin inhibitor	Proteinase inhibitor I13, potato inhibitor I
TraesCS3A01G088500	3A	56 853 792 .. 56 853 995 (+)	203	G	MF: serine-type endopeptidase inhibitor activity; BP: response to wounding	Chymotrypsin inhibitor	Proteinase inhibitor I13, potato inhibitor I
TraesCS3A01G088600	3A	56 858 691 .. 56 858 894 (+)	203	G	MF: serine-type endopeptidase inhibitor activity; BP: response to wounding	Chymotrypsin inhibitor	Proteinase inhibitor I13, potato inhibitor I
TraesCS3A01G088700	3A	56 948 633 .. 56 948 836 (+)	203	G	MF: serine-type endopeptidase inhibitor activity; BP: response to wounding	Chymotrypsin inhibitor	Proteinase inhibitor I13, potato inhibitor I
TraesCS3A01G088800	3A	57 013 531 .. 57 013 076 (-)	455	G	CC: nucleosome; MF: DNA binding; MF: protein heterodimerization activity	Histone H2B	Histone H2B; Histone H2A/H2B/H3; Histone-fold
TraesCS3A01G088900	3A	57 026 980 .. 57 017 091 (-)	9889	G		Sec-independent protein translocase protein TatB
TraesCS3A01G089000	3A	57 090 614 .. 57 099 077 (+)	8463	G	MF: nucleotide binding; MF: nucleic acid binding; MF: aminoacyl-tRNA ligase activity; MF: ATP binding; CC: cytoplasm; BP: tRNA aminoacylation for protein translation; MF: ligase activity	Aspartate--tRNA ligase	Aspartyl/Asparaginyl-tRNA synthetase, class IIb; GAD-like domain; Aminoacyl-tRNA synthetase, class II (D/K/N); OB-fold nucleic acid binding domain, AA-tRNA synthetase-type; Aspartate-tRNA ligase, type 1; Aminoacyl-tRNA synthetase, class II; Nucleic acid-binding, OB-fold; GAD domain
TraesCS3A01G089100	3A	57 154 066 .. 57 154 744 (+)	678	G		DUF674 family protein	Protein of unknown function DUF674
TraesCS3A01G089200	3A	57 158 330 .. 57 164 308 (+)	5978	G		Breast cancer type 2 susceptibility protein-like protein	BRCA2 repeat
TraesCS3A01G089300	3A	57 195 259 .. 57 200 522 (+)	5263	G		Trichome birefringence-like protein	PMR5 N-terminal domain; PC-Esterase
TraesCS3A01G089400	3A	57 216 510 .. 57 215 581 (-)	929	G		Dynamin-3
TraesCS3A01G089500	3A	57 227 122 .. 57 226 198 (-)	924	G		DUF674 family protein	Protein of unknown function DUF674
TraesCS3A01G089600	3A	57 246 485 .. 57 243 781 (-)	2704	G		DUF674 family protein	Protein of unknown function DUF674
TraesCS3A01G089700	3A	57 260 777 .. 57 264 786 (+)	4009	G	CC: endoplasmic reticulum; CC: integral component of membrane; MF: transferase activity, transferring hexosyl groups	Dol-P-Man:Man(5)GlcNAc(2)-PP-Dol alpha-1,3-mannosyltransferase	Glycosyltransferase, ALG3
TraesCS3A01G089800	3A	57 271 231 .. 57 272 775 (+)	1544	TE		Transposon protein, putative, Mutator sub-class	Transposase, MuDR, plant
TraesCS3A01G089900	3A	57 277 429 .. 57 276 120 (-)	1309	G	MF: zinc ion binding	Phenylalanine--tRNA ligase alpha subunit	Zinc finger, GRF-type
TraesCS3A01G090000	3A	57 277 812 .. 57 286 023 (+)	8211	G	BP: cellular protein modification process; MF: small protein activating enzyme activity	SUMO-activating enzyme subunit 1A	Ubiquitin/SUMO-activating enzyme E1; THIF-type NAD/FAD binding fold
TraesCS3A01G090100	3A	57 374 570 .. 57 378 482 (+)	3913	G		Transmembrane protein, putative
TraesCS3A01G090200	3A	57 429 187 .. 57 431 962 (+)	2776	TE		Retrovirus-related Pol polyprotein from transposon TNT 1-94
TraesCS3A01G090300	3A	57 481 565 .. 57 482 942 (+)	1378	G	MF: DNA binding; MF: transcription factor activity, sequence-specific DNA binding; CC: nucleus; BP: regulation of transcription, DNA-templated; MF: protein dimerization activity	MADS-box transcription factor	Transcription factor, MADS-box; Transcription factor, K-box
TraesCS3A01G090400	3A	57 514 756 .. 57 517 492 (+)	2737	G	MF: ATP binding	ATP-dependent Clp protease ATP-binding subunit	ClpA/B family; AAA+ ATPase domain; ATPase, AAA-type, core; Clp ATPase, C-terminal; P-loop containing nucleoside triphosphate hydrolase
TraesCS3A01G090500	3A	57 560 501 .. 57 562 978 (+)	2478	G		Transducin/WD40 repeat-like superfamily protein
TraesCS3A01G090600	3A	57 590 990 .. 57 592 450 (+)	1461	TE		Protein FAR1-RELATED SEQUENCE 5
TraesCS3A01G090700	3A	57 614 383 .. 57 612 471 (-)	1913	G		E3 ubiquitin-protein ligase SINA-like 10
TraesCS3A01G090800	3A	57 704 543 .. 57 702 664 (-)	1880	TE?		F-box family protein	Domain unknown function DUF295
TraesCS3A01G090900	3A	57 717 750 .. 57 715 937 (-)	1814	G	MF: DNA binding; MF: transcription factor activity, sequence-specific DNA binding; CC: nucleus; BP: regulation of transcription, DNA-templated; MF: protein dimerization activity	MADS-box transcription factor	Transcription factor, MADS-box; Transcription factor, K-box
TraesCS3A01G091000	3A	57 774 541 .. 57 777 732 (+)	3192	G	MF: protein binding	Ankyrin repeat protein-like	Ankyrin repeat; Tetratricopeptide-like helical domain; Tetratricopeptide repeat-containing domain; Tetratricopeptide repeat; Ankyrin repeat-containing domain
TraesCS3A01G091100	3A	57 804 104 .. 57 809 597 (+)	5494	G	MF: protein kinase activity; MF: protein binding; MF: ATP binding; BP: protein phosphorylation	Receptor-like kinase	Protein kinase domain; Leucine-rich repeat; Serine/threonine-protein kinase, active site; Protein kinase-like domain; Leucine-rich repeat-containing N-terminal, plant-type; Protein kinase, ATP binding site; Leucine-rich repeat domain, L domain-like
TraesCS3A01G091200	3A	57 812 878 .. 57 813 177 (+)	300	G		Clavata3/ESR (CLE) gene family member
TraesCS3A01G091300	3A	57 851 360 .. 57 851 941 (+)	582	TE	MF: nucleic acid binding	Polynucleotidyl transferase, ribonuclease H-like superfamily protein	Ribonuclease H-like domain
TraesCS3A01G091400	3A	57 859 751 .. 57 855 684 (-)	4068	G	MF: metal ion binding	SH3 domain-containing protein	FYVE zinc finger; Ysc84 actin-binding domain; Zinc finger, FYVE/PHD-type; Zinc finger, RING/FYVE/PHD-type; Zinc finger, FYVE-related
TraesCS3A01G091500	3A	57 859 957 .. 57 862 704 (+)	2748	G	BP: response to desiccation	Late embryogenesis abundant protein Lea14	Late embryogenesis abundant protein, LEA-14; Immunoglobulin-like fold; Water stress and hypersensitive response domain
TraesCS3A01G091600	3A	57 864 567 .. 57 871 556 (+)	6990	G	BP: pseudouridine synthesis; MF: RNA binding; BP: RNA modification; MF: pseudouridine synthase activity	tRNA pseudouridine synthase A	Pseudouridine synthase I, TruA; Pseudouridine synthase I, TruA, C-terminal; Pseudouridine synthase I, TruA, alpha/beta domain; Pseudouridine synthase, catalytic domain
TraesCS3A01G091700	3A	57 873 409 .. 57 883 353 (+)	9945	G		Nucleolar RNA binding protein
TraesCS3A01G091800	3A	57 892 333 .. 57 887 384 (-)	4950	G	MF: protein kinase activity; MF: protein serine/threonine kinase activity; MF: ATP binding; BP: protein phosphorylation	Serine/threonine-protein kinase	Protein kinase domain; Bulb-type lectin domain; Serine/threonine-protein kinase, active site; Protein kinase-like domain; Protein kinase, ATP binding site; S-receptor-like serine/threonine-protein kinase
TraesCS3A01G091900	3A	57 896 765 .. 57 894 487 (-)	2279	G	MF: protein binding	Pentatricopeptide repeat-containing protein	Pentatricopeptide repeat; Tetratricopeptide-like helical domain
TraesCS3A01G092000	3A	57 897 900 .. 57 896 894 (-)	1007	G	BP: response to stress	Adenine nucleotide alpha hydrolases-like superfamily protein	UspA; IPR014729: Rossmann-like alpha/beta/alpha sandwich fold
TraesCS3A01G092100	3A	57 902 453 .. 57 898 825 (-)	3629	G		NADH-quinone oxidoreductase subunit C/D
TraesCS3A01G092200	3A	57 903 709 .. 57 906 531 (+)	2823	TE?	MF: protein binding	F-box/LRR-repeat protein	Leucine-rich repeat; F-box domain; Leucine-rich repeat, cysteine-containing subtype; Leucine-rich repeat domain, L domain-like
TraesCS3A01G092300	3A	57 948 108 .. 57 943 487 (-)	4602	G	MF: protein kinase activity; MF: protein binding; MF: ATP binding; BP: protein phosphorylation	Receptor protein kinase, putative	Protein kinase domain; Leucine-rich repeat; Leucine-rich repeat, typical subtype; Serine/threonine-protein kinase, active site; Protein kinase-like domain; Leucine-rich repeat-containing N-terminal, plant-type; Protein kinase, ATP binding site; Leucine-rich repeat domain, L domain-like
TraesCS3A01G092400	3A	57 960 372 .. 57 958 367 (-)	2006	G		D111/G-patch domain-containing protein
TraesCS3A01G092500	3A	58 077 400 .. 58 077 003 (-)	398	G	CC: signal recognition particle, endoplasmic reticulum targeting; BP: SRP-dependent cotranslational protein targeting to membrane; MF: 7S RNA binding; MF: endoplasmic reticulum signal peptide binding; CC: signal recognition particle	Signal recognition particle 14 kDa protein	Signal recognition particle, SRP14 subunit; Signal recognition particle, SRP9/SRP14 subunit
TraesCS3A01G092600	3A	58 467 981 .. 58 468 738 (+)	758	G		Protease inhibitor/seed storage/lipid transfer family protein
TraesCS3A01G092700	3A	58 687 298 .. 58 683 126 (-)	4173	G		carboxyl-terminal peptidase, putative (DUF239)	Neprosin; Neprosin activation peptide
TraesCS3A01G092800	3A	58 839 205 .. 58 836 094 (-)	3112	G	MF: catalytic activity	Raffinose synthase family protein	Glycosyl hydrolases 36; Aldolase-type TIM barrel; Glycoside hydrolase superfamily
TraesCS3A01G092900	3A	58 927 199 .. 58 931 762 (+)	4564	G		Proline-rich receptor-like kinase, putative (DUF1421)	Protein of unknown function DUF1421
QGpc.ippg-3A.2
TraesCS3A01G260800	3A	483 743 285 .. 483 748 593 (+)	5309	G	MF: protein binding	Glutathione S-transferase	Glutathione S-transferase, N-terminal; Glutathione S-transferase, C-terminal-like; Thioredoxin-like fold
TraesCS3A01G260900	3A	483 750 747 .. 483 751 352 (+)	606	G		Ferrochelatase
TraesCS3A01G261000	3A	483 921 745 .. 483 922 769 (+)	1025	G		LOV KELCH protein 2
TraesCS3A01G261100	3A	484 100 825 .. 484 101 721 (+)	897	TE?		Zinc finger SWIM domain-containing protein 3
TraesCS3A01G261200	3A	484 109 459 .. 484 103 270 (-)	6190	G	MF: hydrolase activity	Serine/threonine-protein phosphatase	Calcineurin-like phosphoesterase domain, ApaH type; Serine/threonine-specific protein phosphatase/bis(5-nucleosyl)-tetraphosphatase; Metallo-dependent phosphatase-like
TraesCS3A01G261300	3A	484 119 997 .. 484 112 133 (-)	7865	TE?	MF: DNA binding; MF: ATP-dependent DNA helicase activity; MF: ATP binding; BP: nucleotide-excision repair; BP: transcription initiation from RNA polymerase II promoter; MF: hydrolase activity	DNA repair helicase	Helicase XPB/Ssl2; Helicase, C-terminal; Helicase/UvrB, N-terminal; Helicase superfamily 1/2, ATP-binding domain; P-loop containing nucleoside triphosphate hydrolase; ERCC3/RAD25/XPB helicase, C-terminal domain; Helicase XPB/Ssl2, N-terminal domain
TraesCS3A01G261400	3A	484 627 419 .. 484 631 599 (+)	4977	G	MF: catalytic activity; BP: biosynthetic process	Phosphopantetheine adenylyltransferase	Cytidyltransferase-like domain; Rossmann-like alpha/beta/alpha sandwich fold
TraesCS3A01G261500	3A	484 633 291 .. 484 631 723 (-)	1569	G		Reticulon-like protein	Reticulon
TraesCS3A01G261600	3A	484 634 127 .. 484 634 414 (+)	288	G		Lipid transfer protein	Bifunctional inhibitor/plant lipid transfer protein/seed storage helical domain
TraesCS3A01G261700	3A	484 637 247 .. 484 634 556 (-)	2692	G	MF: hydrolase activity, hydrolyzing O-glycosyl compounds; MF: protein kinase activity; MF: ATP binding; BP: carbohydrate metabolic process; BP: protein phosphorylation	Protein kinase family protein	Protein kinase domain; Glycoside hydrolase family 18, catalytic domain; Serine-threonine/tyrosine-protein kinase, catalytic domain; Glycoside hydrolase, chitinase active site; Protein kinase-like domain; Glycoside hydrolase superfamily
TraesCS3A01G261800	3A	484 641 275 .. 484 637 356 (-)	3920	G	MF: protein kinase activity; MF: ATP binding; BP: protein phosphorylation; MF: polysaccharide binding	Receptor-like protein kinase	Protein kinase domain; Serine-threonine/tyrosine-protein kinase, catalytic domain; Serine/threonine-protein kinase, active site; Protein kinase-like domain; Protein kinase, ATP binding site; Wall-associated receptor kinase, galacturonan-binding domain; Wall-associated receptor kinase, C-terminal
TraesCS3A01G261900	3A	484 651 074 .. 484 650 044 (-)	1031	G		Protein kinase family protein	Wall-associated receptor kinase, C-terminal
TraesCS3A01G262000	3A	484 722 979 .. 484 720 518 (-)	2461	G	MF: polysaccharide binding	Receptor-like kinase	Wall-associated receptor kinase, galacturonan-binding domain; Wall-associated receptor kinase, C-terminal
TraesCS3A01G262100	3A	484 990 096 .. 484 991 384 (+)	1289	G	MF: polysaccharide binding	Receptor-like kinase	Wall-associated receptor kinase, galacturonan-binding domain; Wall-associated receptor kinase, C-terminal
TraesCS3A01G262200	3A	484 999 197 .. 485 011 809 (+)	12613	G	MF: protein kinase activity; MF: ATP binding; BP: protein phosphorylation	Protein kinase family protein	Protein kinase domain; Serine/threonine-protein kinase, active site; Protein kinase-like domain; Protein kinase, ATP binding site; Wall-associated receptor kinase, C-terminal
TraesCS3A01G262400	3A	485 015 135 .. 485 011 944 (-)	2451	G		Alpha/beta-Hydrolases superfamily protein	Serine aminopeptidase, S33; Alpha/Beta hydrolase fold
TraesCS3A01G262500	3A	485 521 841 .. 485 525 243 (+)	3403	G		Protein FAM204A
TraesCS3A01G262600	3A	485 592 794 .. 485 594 081 (+)	1288	TE?		Zinc finger protein-like
TraesCS3A01G262700	3A	485 676 140 .. 485 688 484 (+)	12345	TE?	MF: protein binding; MF: zinc ion binding	Zinc finger protein-like	Zinc finger, RING-type; Zinc finger, CHY-type; Haemerythrin-like; Zinc finger, RING/FYVE/PHD-type; Zinc finger, CTCHY-type
TraesCS3A01G262800	3A	485 940 798 .. 485 942 328 (+)	1531	G		DUF1639 family protein	Protein of unknown function DUF1639
TraesCS3A01G262900	3A	485 993 307 .. 485 995 281 (+)	1975	G		70-kDa heat shock protein	Heat shock protein 70 family; Heat shock protein 70, conserved site; Heat shock protein 70kD, peptide-binding domain; Heat shock protein 70kD, C-terminal domain
TraesCS3A01G263000	3A	486 044 517 .. 486 045 706 (+)	1190	G		DUF1639 family protein	Protein of unknown function DUF1639
TraesCS3A01G263100	3A	486 220 278 .. 486 220 087 (-)	192	G		dTDP-4-dehydrorhamnose reductase
TraesCS3A01G263200	3A	486 223 480 .. 486 221 895 (-)	1586	TE?		F-box domain containing protein, expressed
TraesCS3A01G263300	3A	486 930 086 .. 486 928 055 (-)	2032	G	BP: tRNA processing	tRNA dimethylallyltransferase	tRNA dimethylallyltransferase; P-loop containing nucleoside triphosphate hydrolase
TraesCS3A01G263400	3A	487 431 890 .. 487 435 435 (+)	3546	G		Alpha/beta-Hydrolases superfamily protein	Alpha/beta hydrolase fold-1; Serine aminopeptidase, S33; Alpha/Beta hydrolase fold
TraesCS3A01G263500	3A	487 436 557 .. 487 439 668 (+)	3112	G	BP: protein transport	Regulator of Vps4 activity in the MVB pathway protein	Vacuolar protein sorting-associated protein Ist1
TraesCS3A01G263600	3A	487 443 724 .. 487 443 317 (-)	408	G		Liprin-beta-1
TraesCS3A01G263700	3A	487 444 146 .. 487 447 816 (+)	3671	G		Arginine/serine-rich coiled coil protein, putative
TraesCS3A01G263800	3A	487 451 984 .. 487 448 225 (-)	3760	G	BP: biosynthetic process; MF: hydroxymethyl-, formyl- and related transferase activity	Methionyl-tRNA formyltransferase	Formyl transferase, N-terminal
TraesCS3A01G263900	3A	487 855 279 .. 487 853 163 (-)	2117	G	MF: protein binding	Guanine nucleotide-binding protein beta subunit-like protein	WD40 repeat; WD40/YVTN repeat-like-containing domain; WD40-repeat-containing domain; WD40 repeat, conserved site; G-protein beta WD-40 repeat
TraesCS3A01G264000	3A	487 857 253 .. 487 859 848 (+)	2596	TE?	MF: zinc ion binding	RING/FYVE/PHD zinc finger superfamily protein	Zinc finger, RING-CH-type; Zinc finger, RING/FYVE/PHD-type; Protein of unknown function DUF3675
TraesCS3A01G264100	3A	487 865 764 .. 487 859 734 (-)	6031	G	MF: methyltransferase activity	Protein methyltransferase	Methyltransferase domain; Protein-lysine N-methyltransferase Efm4; S-adenosyl-L-methionine-dependent methyltransferase
TraesCS3A01G264200	3A	488 109 839 .. 488 108 205 (-)	1635	G	BP: metabolic process; MF: transferase activity, transferring hexosyl groups	Glycosyltransferase	UDP-glucuronosyl/UDP-glucosyltransferase
TraesCS3A01G264300	3A	488 261 318 .. 488 260 517 (-)	802	G		DUF4228 domain protein	Protein of unknown function DUF4228, plant
TraesCS3A01G264400	3A	488 282 784 .. 488 283 453 (+)	670	G	MF: catalytic activity	Protein trpH	Polymerase/histidinol phosphatase-like
TraesCS3A01G264500	3A	488 303 929 .. 488 303 038 (-)	892	G		DUF4228 domain protein	Protein of unknown function DUF4228, plant
TraesCS3A01G264600	3A	488 312 183 .. 488 307 783 (-)	4401	G		Microtubule-associated protein-like
TraesCS3A01G264700	3A	488 724 905 .. 488 720 771 (-)	4135	G	CC: mitochondrial proton-transporting ATP synthase complex, catalytic core F(1); MF: ATP binding; BP: ATP biosynthetic process; BP: ATP synthesis coupled proton transport; BP: proton transport; MF: ATPase activity; CC: proton-transporting ATP synthase complex, catalytic core F(1); BP: ATP metabolic process; MF: proton-transporting ATP synthase activity, rotational mechanism	ATP synthase subunit beta	ATPase, F1/V1/A1 complex, alpha/beta subunit, nucleotide-binding domain; AAA+ ATPase domain; IPR004100: ATPase, F1/V1/A1 complex, alpha/beta subunit, N-terminal domain; ATP synthase, F1 complex, beta subunit; ATPase, alpha/beta subunit, nucleotide-binding domain, active site; ATP synthase, F1 beta subunit; ATPase, F1/V1 complex, beta/alpha subunit, C-terminal; P-loop containing nucleoside triphos…
TraesCS3A01G264800	3A	489 189 358 .. 489 204 877 (+)	15520	G	MF: DNA binding; MF: DNA ligase activity; MF: DNA ligase (ATP) activity; MF: ATP binding; BP: DNA repair; BP: DNA recombination; BP: DNA ligation involved in DNA repair; BP: DNA biosynthetic process	DNA ligase	DNA ligase, ATP-dependent; Metallo-beta-lactamase; DNA repair metallo-beta-lactamase; DNA ligase, ATP-dependent, N-terminal; DNA ligase, ATP-dependent, C-terminal; DNA ligase, ATP-dependent, central; Nucleic acid-binding, OB-fold; DNA ligase, ATP-dependent, conserved site
TraesCS3A01G264900	3A	489 311 963 .. 489 311 494 (-)	470	G	MF: DNA binding	Myb transcription factor	SANT/Myb domain; Homeobox domain-like; Myb domain
TraesCS3A01G265000	3A	489 458 645 .. 489 461 295 (+)	2651	G	CC: nucleus; BP: chromatin assembly or disassembly	Histone chaperone	Histone chaperone ASF1-like
TraesCS3A01G265100	3A	489 565 727 .. 489 568 954 (+)	3228	G	BP: drug transmembrane transport; MF: drug transmembrane transporter activity; MF: antiporter activity; CC: membrane; BP: transmembrane transport	Protein DETOXIFICATION	Multi antimicrobial extrusion protein
TraesCS3A01G265200	3A	489 637 153 .. 489 636 194 (-)	960	TE?		F-box domain containing protein	Leucine-rich repeat domain, L domain-like
TraesCS3A01G265300	3A	489 641 583 .. 489 642 368 (+)	786	TE		Retrotransposon protein, putative, unclassified	Transposase (putative), gypsy type
TraesCS3A01G265500	3A	489 755 541 .. 489 750 529 (-)	5013	G	CC: origin recognition complex; MF: DNA binding; CC: nucleus; BP: DNA replication	Origin recognition complex subunit 4	Origin recognition complex subunit 4; IPR027417: P-loop containing nucleoside triphosphate hydrolase; IPR032705: Origin recognition complex subunit 4, C-terminal
QGpc.ippg-3A.3
TraesCS3A01G284800	3A	513 892 133 .. 513 888 968 (-)	3166	G		Regulator of chromosome condensation (RCC1) family protein	Regulator of chromosome condensation, RCC1; Regulator of chromosome condensation 1/beta-lactamase-inhibitor protein II
TraesCS3A01G284900	3A	513 895 983 .. 513 892 452 (-)	3532	G		CASP-like protein	Casparian strip membrane protein; Domain of unknown function DUF588
TraesCS3A01G285000	3A	513 902 252 .. 513 901 534 (-)	719	G		Lachrymatory-factor synthase	Polyketide cyclase/dehydrase; START-like domain
TraesCS3A01G285100	3A	513 931 736 .. 513 921 245 (-)	10492	G	MF: ATP binding; CC: membrane; MF: ATPase activity	Pleiotropic drug resistance ABC transporter	ABC transporter-like; AAA+ ATPase domain; ABC-2 type transporter; Plant PDR ABC transporter associated; P-loop containing nucleoside triphosphate hydrolase; ABC-transporter extracellular N-terminal domain
TraesCS3A01G285200	3A	514 105 130 .. 514 110 761 (+)	5632	G	MF: ATP binding; BP: transport; CC: integral component of membrane; MF: ATPase activity; MF: ATPase activity, coupled to transmembrane movement of substances; BP: transmembrane transport	ABC transporter B family protein	ABC transporter-like; AAA+ ATPase domain; ABC transporter type 1, transmembrane domain; ABC transporter, conserved site; P-loop containing nucleoside triphosphate hydrolase
TraesCS3A01G285300	3A	514 108 649 .. 514 108 416 (-)	234	G		villin 3
TraesCS3A01G285400	3A	514 109 447 .. 514 109 217 (-)	231	G		Transducin/WD40 repeat-like superfamily protein
TraesCS3A01G285500	3A	514 113 452 .. 514 110 579 (-)	3977	G	MF: DNA binding	B3 domain-containing protein	B3 DNA binding domain; DNA-binding pseudobarrel domain
TraesCS3A01G285600	3A	514 172 583 .. 514 167 393 (-)	5191	G	MF: endopeptidase activity; MF: threonine-type endopeptidase activity; CC: proteasome core complex; BP: ubiquitin-dependent protein catabolic process; CC: proteasome core complex, alpha-subunit complex; BP: proteolysis involved in cellular protein catabolic process	Proteasome subunit alpha type	Proteasome alpha-subunit, N-terminal domain; Proteasome, subunit alpha/beta; Proteasome alpha-type subunit; Nucleophile aminohydrolases, N-terminal
TraesCS3A01G285700	3A	514 237 147 .. 514 233 117 (-)	4031	G	BP: nucleoside metabolic process	Ribose-phosphate pyrophosphokinase, putative	Phosphoribosyltransferase domain; Phosphoribosyltransferase-like; Ribose-phosphate pyrophosphokinase, N-terminal domain
TraesCS3A01G285800	3A	514 307 846 .. 514 306 461 (-)	1386	G	MF: DNA binding	B3 domain-containing protein	B3 DNA binding domain; DNA-binding pseudobarrel domain
TraesCS3A01G285900	3A	514 316 411 .. 514 310 972 (-)	5440	G	MF: malic enzyme activity; MF: malate dehydrogenase (decarboxylating) (NAD+) activity; BP: malate metabolic process; MF: NAD binding; BP: oxidation-reduction process	Malic enzyme	Malic oxidoreductase; Malic enzyme, N-terminal domain; Malic enzyme, NAD-binding; Malic enzyme, conserved site; NAD(P)-binding domain
TraesCS3A01G286000	3A	514 491 827 .. 514 493 502 (+)	1676	G	MF: structural constituent of ribosome; CC: intracellular; CC: ribosome; BP: translation	40S ribosomal protein S24	Ribosomal protein S24e; Ribosomal protein L23/L15e core domain; Ribosomal S24e conserved site
TraesCS3A01G286100	3A	514 495 635 .. 514 493 870 (-)	1766	G		Senescence/dehydration-associated protein-like protein	Senescence/spartin-associated
TraesCS3A01G286200	3A	514 499 622 .. 514 496 263 (-)	3360	G	BP: cellular glucose homeostasis; MF: hexokinase activity; MF: ATP binding; MF: glucose binding; BP: carbohydrate metabolic process; BP: glycolytic process; MF: phosphotransferase activity, alcohol group as acceptor; BP: carbohydrate phosphorylation	Phosphotransferase	Hexokinase; Hexokinase, binding site; Hexokinase, N-terminal; Hexokinase, C-terminal
TraesCS3A01G286300	3A	514 529 939 .. 514 530 223 (+)	285	TE?		DEAD/DEAH box RNA helicase family protein
TraesCS3A01G286400	3A	514 552 792 .. 514 552 313 (-)	480	G		high cyclic electron flow 1
TraesCS3A01G286500	3A	514 557 805 .. 514 562 039 (+)	4235	G	MF: protein kinase activity; MF: protein binding; MF: ATP binding; BP: protein phosphorylation	Receptor-like protein kinase	Protein kinase domain; Serine-threonine/tyrosine-protein kinase, catalytic domain; Leucine-rich repeat; Serine/threonine-protein kinase, active site; Protein kinase-like domain; Protein kinase, ATP binding site; Malectin-like carbohydrate-binding domain; Leucine-rich repeat domain, L domain-like
TraesCS3A01G286600	3A	514 612 758 .. 514 611 251 (-)	1508	G	MF: DNA binding	Myb transcription factor	SANT/Myb domain; Homeobox domain-like; Myb-like domain; IPR017930: Myb domain
TraesCS3A01G286700	3A	514 628 119 .. 514 623 227 (-)	4893	G		Acyl-[acyl-carrier-protein]--UDP-N-acetylglucosamine O-acyltransferase, putative	Hexapeptide repeat; Trimeric LpxA-like; Udp N-acetylglucosamine O-acyltransferase, C-terminal
TraesCS3A01G286800	3A	515 244 443 .. 515 248 194 (+)	3752	G		RNA binding protein	Hyaluronan/mRNA-binding protein; Stm1-like, N-terminal
TraesCS3A01G286900	3A	515 282 019 .. 515 280 520 (-)	1500	G	MF: ADP binding	NBS-LRR-like resistance protein	NB-ARC; P-loop containing nucleoside triphosphate hydrolase
TraesCS3A01G287000	3A	515 283 046 .. 515 284 656 (+)	1611	G	MF: ADP binding	NBS-LRR-like resistance protein	NB-ARC; P-loop containing nucleoside triphosphate hydrolase
TraesCS3A01G287100	3A	515 285 833 .. 515 285 594 (-)	240	G		GATA transcription factor 11
TraesCS3A01G287200	3A	515 723 022 .. 515 725 171 (+)	2150	G	MF: ADP binding	NBS-LRR-like resistance protein	NB-ARC; P-loop containing nucleoside triphosphate hydrolase
TraesCS3A01G287300	3A	515 735 501 .. 515 734 859 (-)	643	G		Fusarium resistance protein I2C-5-like
TraesCS3A01G287400	3A	515 829 022 .. 515 828 111 (-)	912	G	CC: cytoplasm; BP: cysteine biosynthetic process from serine; MF: serine O-acetyltransferase activity; MF: transferase activity	Serine acetyltransferase	Hexapeptide repeat; Serine O-acetyltransferase; Serine acetyltransferase, N-terminal; Trimeric LpxA-like; Hexapeptide transferase, conserved site
TraesCS3A01G287500	3A	515 860 944 .. 515 862 370 (+)	1427	G	MF: phosphatase activity	Inorganic pyrophosphatase 2	Pyridoxal phosphate phosphatase-related; Phosphatase PHOSPHO-type; HAD-like domain
TraesCS3A01G287600	3A	515 886 480 .. 515 890 148 (+)	3669	G	MF: NADH dehydrogenase (ubiquinone) activity; MF: quinone binding; MF: iron-sulfur cluster binding; MF: 4 iron, 4 sulfur cluster binding; BP: oxidation-reduction process	NADH-quinone oxidoreductase subunit B	NADH:ubiquinone oxidoreductase-like, 20kDa subunit; NADH-ubiquinone oxidoreductase, 20 Kd subunit
TraesCS3A01G287700	3A	515 913 130 .. 515 915 500 (+)	2371	G	CC: mitochondrial proton-transporting ATP synthase complex, coupling factor F(o); MF: hydrogen ion transmembrane transporter activity; BP: ATP synthesis coupled proton transport	ATP synthase subunit g, mitochondrial	ATP synthase, F0 complex, subunit G, mitochondrial
TraesCS3A01G287800	3A	516 119 133 .. 516 120 206 (+)	1074	G	MF: aspartic-type endopeptidase activity; BP: proteolysis	Eukaryotic aspartyl protease family protein	Aspartic peptidase A1 family; Aspartic peptidase domain; Xylanase inhibitor, C-terminal; Xylanase inhibitor, N-terminal; Peptidase family A1 domain
TraesCS3A01G287900	3A	516 127 882 .. 516 120 185 (-)	7698	G	MF: protein binding; MF: zinc ion binding	RING/U-box protein	Zinc finger, RING-type; Zinc finger, PHD-type; Zinc finger, FYVE/PHD-type; Zinc finger, RING/FYVE/PHD-type; Zinc finger, RING-type, conserved site; Zinc finger, PHD-finger; Elongin A binding-protein 1
TraesCS3A01G288000	3A	516 239 656 .. 516 238 032 (-)	1625	G	MF: serine-type carboxypeptidase activity; BP: proteolysis	Serine carboxypeptidase, putative	Peptidase S10, serine carboxypeptidase; Alpha/Beta hydrolase fold; Serine carboxypeptidases, histidine active site
TraesCS3A01G288100	3A	516 545 931 .. 516 543 985 (-)	1947	G		GDSL esterase/lipase	Alpha/Beta hydrolase fold
TraesCS3A01G288200	3A	516 556 313 .. 516 551 835 (-)	4175	G	MF: ATP binding	Cytosolic Fe-S cluster assembly factor NBP35	Mrp, conserved site; Domain of unknown function DUF59; Domain of unknown function DUF971; Mrp/NBP35 ATP-binding protein; P-loop containing nucleoside triphosphate hydrolase; Flagellum site-determining protein YlxH/ Fe-S cluster assembling factor NBP35
TraesCS3A01G288300	3A	516 634 290 .. 516 632 209 (-)	2082	G	BP: metal ion transport; MF: metal ion binding	Copper transport protein family	Heavy metal-associated domain, HMA
TraesCS3A01G288400	3A	516 643 004 .. 516 638 019 (-)	5747	G		CASC3/Barentsz eIF4AIII binding protein
TraesCS3A01G288500	3A	516 787 584 .. 516 782 439 (-)	5146	TE		Aminotransferase-like, plant mobile domain-containing protein
TraesCS3A01G288600	3A	516 790 141 .. 516 791 044 (+)	904	G		NPK1-related protein kinase 1
TraesCS3A01G288700	3A	516 793 414 .. 516 794 155 (+)	742	G		JEKYLL protein
TraesCS3A01G288800	3A	516 806 547 .. 516 801 820 (-)	4728	G	MF: secondary active sulfate transmembrane transporter activity; BP: sulfate transport; MF: sulfate transmembrane transporter activity; CC: membrane; CC: integral component of membrane; BP: transmembrane transport	Sulfate transporter, putative	SLC26A/SulP transporter; STAS domain; SLC26A/SulP transporter domain; Sulphate anion transporter, conserved site
TraesCS3A01G288900	3A	517 074 705 .. 517 080 156 (+)	5452	TE?	MF: protein binding; MF: zinc ion binding	RING finger and CHY zinc finger protein	Zinc finger, RING-type; Zinc finger, RING/FYVE/PHD-type; Zinc finger, CTCHY-type
TraesCS3A01G289000	3A	517 097 078 .. 517 094 994 (-)	2085	G		senescence-associated family protein (DUF581)	Zf-FLZ domain
TraesCS3A01G289100	3A	517 132 313 .. 517 128 294 (-)	4020	TE		Retrotransposon protein, putative, unclassified
TraesCS3A01G289200	3A	517 491 132 .. 517 499 272 (+)	8141	G	MF: transcription factor activity, sequence-specific DNA binding; CC: nucleus; BP: regulation of transcription, DNA-templated; MF: sequence-specific DNA binding	Heat shock transcription factor	Heat shock factor (HSF)-type, DNA-binding; Winged helix-turn-helix DNA-binding domain
TraesCS3A01G289300	3A	517 666 931 .. 517 661 652 (-)	5280	G	MF: catalytic activity; BP: trehalose biosynthetic process	Trehalose-6-phosphate synthase 6	Glycosyl transferase, family 20; Trehalose-phosphatase; HAD-superfamily hydrolase, subfamily IIB; HAD-like domain
TraesCS3A01G289400	3A	517 996 303 .. 517 997 481 (+)	1179	G		transcription repressor	Ovate protein family, C-terminal
TraesCS3A01G289500	3A	518 468 386 .. 518 489 743 (+)	21358	G		Triose-phosphate transporter family protein	Sugar phosphate transporter domain
TraesCS3A01G289600	3A	518 630 048 .. 518 634 405 (+)	4358	G	MF: GTPase activity; MF: GTP binding	Ras-related protein, expressed	Small GTPase superfamily; Small GTP-binding protein domain; P-loop containing nucleoside triphosphate hydrolase
TraesCS3A01G289700	3A	518 643 594 .. 518 641 990 (-)	1605	G	MF: transcription factor activity, sequence-specific DNA binding; BP: regulation of transcription, DNA-templated; MF: sequence-specific DNA binding	WRKY transcription factor	WRKY domain
TraesCS3A01G289800	3A	518 720 116 .. 518 723 505 (+)	3390	G		PROTEIN TARGETING TO STARCH (PTST)	Domain of unknown function DUF1618
TraesCS3A01G289900	3A	518 895 097 .. 518 901 097(+)	6001	G	CC: membrane; MF: cellulose synthase (UDP-forming) activity; BP: cellulose biosynthetic process	Cellulose synthase	Cellulose synthase; Nucleotide-diphospho-sugar transferases
TraesCS3A01G290000	3A	518 907 349 .. 518 905 714 (-)	1636	G	MF: protein binding	Leucine-rich repeat receptor-like protein kinase family	Leucine-rich repeat; Leucine-rich repeat domain, L domain-like
TraesCS3A01G290100	3A	519 086 016 .. 519 082 842 (-)	3175	G		Coiled-coil domain-containing protein 25	Domain of unknown function DUF814
TraesCS3A01G290200	3A	519 210 416 .. 519 207 407 (-)	3010	G	MF: GTPase activity; MF: GTP binding	Ras-like protein	Small GTPase superfamily; Small GTP-binding protein domain; P-loop containing nucleoside triphosphate hydrolase
TraesCS3A01G290300	3A	519 247 901 .. 519 244 293 (-)	11306	G	MF: protein kinase activity; MF: ATP binding; BP: protein phosphorylation	Receptor protein kinase	Protein kinase domain; Serine-threonine/tyrosine-protein kinase, catalytic domain; Serine/threonine-protein kinase, active site; Protein kinase-like domain; Protein kinase, ATP binding site
TraesCS3A01G290400	3A	519 274 572 .. 519 273 897 (-)	676	G		Neuronal acetylcholine receptor subunit alpha-5
TraesCS3A01G290500	3A	519 391 063 .. 519 391 260 (+)	198	G		Transmembrane protein, putative
TraesCS3A01G290600	3A	519 407 036 .. 519 406 160 (-)	877	G		pumilio 2
TraesCS3A01G290700	3A	519 769 733 .. 519 763 844 (-)	5890	G		Protein TIC 22-like, chloroplastic	Tic22-like
TraesCS3A01G290800	3A	520 431 567 .. 520 442 704 (+)	11138	G		tobamovirus multiplication protein	Domain of unknown function DUF1084
TraesCS3A01G290900	3A	520 968 458 .. 520 965 283 (-)	3176	G	BP: lipid metabolic process	Protein glycosylationmyb-like TTH transcriptional regulator	Fungal lipase-like domain; Alpha/Beta hydrolase fold
QGpc.ippg-3A.4
TraesCS3A01G291000	3A	521 302 018 .. 521 304 634 (+)	2617	TE?	MF: protein binding	F-box family protein	F-box domain; Leucine-rich repeat domain, L domain-like
TraesCS3A01G291100	3A	521 308 586 .. 521 304 582 (-)	4005	G	MF: 3-hydroxyisobutyryl-CoA hydrolase activity	3-hydroxyisobutyryl-CoA hydrolase-like protein	ClpP/crotonase-like domain; Enoyl-CoA hydratase/isomerase, HIBYL-CoA-H type
TraesCS3A01G291200	3A	521 598 308 .. 521 597 444 (-)	865	G	MF: structural constituent of ribosome; CC: ribosome; BP: translation	60S ribosomal protein L18a	Ribosomal protein 50S-L18Ae/60S-L20/60S-L18A; 50S ribosomal protein L18Ae/60S ribosomal protein L20 and L18a
TraesCS3A01G291300	3A	521 601 957 .. 521 598 844 (-)	3114	G		Glucosidase 2 subunit beta	Glucosidase II beta subunit, N-terminal
TraesCS3A01G291400	3A	521 629 276 .. 521 629 836 (+)	561	G	MF: DNA binding; MF: transcription factor activity, sequence-specific DNA binding; BP: regulation of transcription, DNA-templated	Ethylene-responsive transcription factor, putative	AP2/ERF domain; DNA-binding domain
TraesCS3A01G291500	3A	521 637 068 .. 521 630 604 (-)	6465	G	MF: lipid-A-disaccharide synthase activity; BP: lipid A biosynthetic process	Lipid-A-disaccharide synthase	Glycosyl transferase, family 19
TraesCS3A01G291600	3A	521 704 596 .. 521 719 191 (+)	14596	G	MF: GTPase activity; MF: GTP binding	Elongation factor 4	Translation elongation factor EFG, V domain; Transcription factor, GTP-binding domain; Small GTP-binding protein domain; GTP-binding protein TypA; Translation protein, beta-barrel domain; Elongation factor G, III-V domain; P-loop containing nucleoside triphosphate hydrolase; Tr-type G domain, conserved site
TraesCS3A01G291700	3A	521 727 053 .. 521 720 470 (-)	6584	G		28 kDa heat-and acid-stable phosphoprotein, putative	Casein kinase substrate, phosphoprotein PP28
TraesCS3A01G291800	3A	522 056 776 .. 522 057 116 (+)	341	G	CC: mitochondrial proton-transporting ATP synthase complex, catalytic core F(1); BP: ATP synthesis coupled proton transport; MF: proton-transporting ATP synthase activity, rotational mechanism	ATP synthase subunit epsilon, mitochondrial	ATP synthase, F1 complex, epsilon subunit, mitochondrial
TraesCS3A01G291900	3A	522 065 340 .. 522 059 913 (-)	5428	ТЕ?		Vascular plant one zinc finger transcription factor protein
TraesCS3A01G292000	3A	522 172 854 .. 522 177 290 (+)	4437	G	MF: oxidoreductase activity; BP: oxidation-reduction process	L-threonine 3-dehydrogenase	GroES-like; Alcohol dehydrogenase, N-terminal; NAD(P)-binding domain; Polyketide synthase, enoylreductase domain
TraesCS3A01G292100	3A	522 180 084 .. 522 177 597 (-)	2488	G		Optic atrophy 3 protein (OPA3)	Optic atrophy 3-like
TraesCS3A01G292200	3A	522 189 016 .. 522 187 371 (-)	1646	G	MF: protein binding	F-box protein SKIP8	UVR domain; Polyketide cyclase SnoaL-like domain; NTF2-like domain
TraesCS3A01G292300	3A	522 241 180 .. 522 242 561 (+)	1382	G	MF: methyltransferase activity; MF: O-methyltransferase activity; MF: protein dimerization activity	O-methyltransferase	O-methyltransferase, family 2; Winged helix-turn-helix DNA-binding domain; Plant methyltransferase dimerisation; O-methyltransferase COMT-type; S-adenosyl-L-methionine-dependent methyltransferase
TraesCS3A01G292400	3A	522 277 462 .. 522 271 068 (-)	6395	G	MF: DNA binding; CC: nucleus; BP: regulation of transcription, DNA-templated; BP: response to hormone	Auxin response factor	B3 DNA binding domain; Auxin response factor; DNA-binding pseudobarrel domain
TraesCS3A01G292500	3A	523 157 850 .. 523 159 024 (+)	1175	G		E6
TraesCS3A01G292600	3A	523 328 130 .. 523 327 127 (-)	1004	G		Nucleic acid-binding, OB-fold	Nucleic acid-binding, OB-fold
TraesCS3A01G292700	3A	523 552 708 .. 523 547 115 (-)	5594	G	CC: 1,3-beta-D-glucan synthase complex; MF: 1,3-beta-D-glucan synthase activity; BP: (1->3)-beta-D-glucan biosynthetic process; CC: membrane	Callose synthase-like protein	Glycosyl transferase, family 48; 1,3-beta-glucan synthase subunit FKS1-like, domain-1
TraesCS3A01G292800	3A	523 561 229 .. 523 555 806 (-)	5424	G		Structural constituent of cell wall protein, putative	Protein of unknown function DUF1421
TraesCS3A01G292900	3A	523 609 314 .. 523 608 479 (-)	836	G		Clavata3/esr-related 4 family protein
TraesCS3A01G293000	3A	523 727 656 .. 523 727 432 (-)	225	G		Clavata3/ESR (CLE) gene family member
TraesCS3A01G293100	3A	523 733 571 .. 523 730 648 (-)	2924	G	MF: protein binding	Pentatricopeptide repeat-containing protein	Pentatricopeptide repeat; Tetratricopeptide-like helical domain
TraesCS3A01G293200	3A	523 746 325 .. 523 746 098 (-)	228	G		Clavata3/ESR (CLE) gene family member
TraesCS3A01G293300	3A	523 758 902 .. 523 747 782 (-)	11432	G		Cleavage and polyadenylation specificity factor (CPSF) A subunit protein
TraesCS3A01G293400	3A	525 297 363 .. 525 298 746 (+)	1384	G	MF: protein binding; MF: zinc ion binding	RING/U-box superfamily protein	Zinc finger, RING-type; Zinc finger, RING/FYVE/PHD-type
TraesCS3A01G293500	3A	525 628 498 .. 525 629 229 (+)	732	G	MF: protein binding; MF: zinc ion binding	Ring finger protein, putative	Zinc finger, RING-type; Zinc finger, RING/FYVE/PHD-type
TraesCS3A01G293600	3A	525 641 936 .. 525 640 597 (-)	1340	G		Structural maintenance of chromosomes protein 2
TraesCS3A01G293700	3A	526 508 219 .. 526 511 244 (+)	3026	G	MF: transcription factor activity, sequence-specific DNA binding; BP: regulation of transcription, DNA-templated; MF: sequence-specific DNA binding	Basic-leucine zipper (BZIP) transcription factor family protein, putative	Basic-leucine zipper domain
TraesCS3A01G293800	3A	526 514 384 .. 526 513 573 (-)	812	G		inner centromere protein, ARK-binding region protein
TraesCS3A01G293900	3A	526 529 172 .. 526 523 938 (-)	5235	G	MF: nucleic acid binding; MF: RNA binding; CC: nucleus; BP: RNA processing; CC: intracellular ribonucleoprotein complex	La protein like	RNA recognition motif domain; Lupus La protein; RNA-binding protein Lupus La; Winged helix-turn-helix DNA-binding domain
TraesCS3A01G294000	3A	526 865 737 .. 526 863 388 (-)	2350	G	MF: oxidoreductase activity; BP: oxidation-reduction process	Gibberellin 2-oxidase	Oxoglutarate/iron-dependent dioxygenase; Non-haem dioxygenase N-terminal domain; Isopenicillin N synthase-like
TraesCS3A01G294100	3A	527 575 567 .. 527 583 033 (+)	7467	G		DNA topoisomerase 2-alpha
TraesCS3A01G294200	3A	527 841 142 .. 527 838 390 (-)	2753	G	MF: ion channel activity; MF: voltage-gated potassium channel activity; BP: ion transport; BP: potassium ion transport; CC: membrane; BP: transmembrane transport	Potassium channel	Cyclic nucleotide-binding domain; Potassium channel, voltage-dependent, EAG/ELK/ERG; Ion transport domain; RmlC-like jelly roll fold; Cyclic nucleotide-binding-like
TraesCS3A01G294300	3A	527 941 206 .. 527 936 886 (-)	4321	U		choice-of-anchor C domain protein, putative (Protein of unknown function, DUF642)	Domain of unknown function DUF642; Galactose-binding domain-like
TraesCS3A01G294400	3A	528 520 299 .. 528 527 374 (+)	7076	G	MF: ATP binding	Katanin p60 ATPase-containing subunit, putative	AAA+ ATPase domain; ATPase, AAA-type, core; P-loop containing nucleoside triphosphate hydrolase
TraesCS3A01G294500	3A	528 531 881 .. 528 528 439 (-)	3443	G		Calcyclin-binding protein	CS domain; SGS domain; HSP20-like chaperone; Siah interacting protein, N-terminal
TraesCS3A01G294600	3A	528 556 687 .. 528 555 337 (-)	1351	G		Interactor of constitutive active ROPs protein, putative
TraesCS3A01G294700	3A	528 591 755 .. 528 597 222 (+)	5468	G	MF: damaged DNA binding; BP: DNA repair	DNA polymerase IV	UmuC domain; DNA polymerase eta/kappa; DNA polymerase, Y-family, little finger domain
TraesCS3A01G294800	3A	528 602 428 .. 528 597 381 (-)	5048	G	BP: metabolic process; MF: riboflavin kinase activity; BP: riboflavin biosynthetic process; MF: hydrolase activity	Riboflavin kinase/fmn hydrolase	HAD hydrolase, subfamily IA; Phosphoglycolate phosphatase, domain 2; HAD-like domain; Riboflavin kinase domain
TraesCS3A01G294900	3A	529 106 304 .. 529 107 880 (+)	1577	G	MF: acetylglucosaminyltransferase activity; CC: membrane	Core-2/I-branching beta-1,6-N-acetylglucosaminyltransferase family protein, putative	Glycosyl transferase, family 14
TraesCS3A01G295000	3A	529 143 340 .. 529 140 099 (-)	3242	G		Coenzyme Q-binding protein COQ10, mitochondrial	Coenzyme Q-binding protein COQ10, START domain; START-like domain
TraesCS3A01G295100	3A	529 206 501 .. 529 205 494 (-)	1008	G		LOB domain-containing protein, putative	Lateral organ boundaries, LOB
TraesCS3A01G295200	3A	529 209 513 .. 529 207 149 (-)	2365	G	MF: protein binding; CC: nucleus; MF: histone-lysine N-methyltransferase activity	Histone-lysine N-methyltransferase	SET domain; AWS domain
TraesCS3A01G295300	3A	529 218 223 .. 529 214 571 (-)	3653	G	MF: catalytic activity; CC: transcription factor TFIIF complex; BP: transcription from RNA polymerase II promoter; BP: transcription initiation from RNA polymerase II promoter	Transcription initiation factor IIF subunit beta	Transcription initiation factor IIF, beta subunit; Transcription Factor IIF, Rap30/Rap74, interaction; Winged helix-turn-helix DNA-binding domain
TraesCS3A01G295400	3A	529 612 252 .. 529 619 205 (+)	6954	G		Double stranded RNA binding protein 3	Double-stranded RNA-binding domain
TraesCS3A01G295500	3A		4843	G	MF: hydrolase activity, hydrolyzing O-glycosyl compounds; BP: carbohydrate metabolic proces	Beta-glucosidase	Glycoside hydrolase, family 3, N-terminal; Glycoside hydrolase family 3 C-terminal domain; Glycoside hydrolase superfamily
TraesCS3A01G295600	3A	529 777 599 .. 529 776 872 (-)	728	G		Leucine-rich repeat protein kinase family protein
TraesCS3A01G295700	3A	529 843 519 .. 529 842 655 (-)	865	G		cytochrome P450, family 72, subfamily A, polypeptide 7
TraesCS3A01G295800	3A	529 843 676 .. 529 844 527 (+)	852	G		Late embryogenesis abundant (LEA) hydroxyproline-rich glycoprotein family	Immunoglobulin-like fold
TraesCS3A01G295900	3A	530 177 578 .. 530 198 100 (+)	20437	G	MF: protein binding; BP: ubiquitin-dependent protein catabolic process; BP: protein deubiquitination; MF: thiol-dependent ubiquitinyl hydrolase activity	Ubiquitin carboxyl-terminal hydrolase, putative	Peptidase C19, ubiquitin carboxyl-terminal hydrolase; MATH/TRAF domain; TRAF-like; Ubiquitin specific protease, conserved site; Ubiquitin carboxyl-terminal hydrolase 7, ICP0-binding domain; Ubiquitin specific protease domain; Ubiquitin carboxyl-terminal hydrolase, C-terminal
TraesCS3A01G296000	3A	530 433 790 .. 530 435 217 (+)	1428	G		Chaperone DnaJ
TraesCS3A01G296100	3A	530 437 293 .. 530 435 331 (-)	1963	G		Mal d 1-associated protein
TraesCS3A01G296200	3A	530 474 346 .. 530 479 221 (+)	4876	G	CC: mitochondrial matrix	Mitochondrial glycoprotein	Mitochondrial glycoprotein
TraesCS3A01G296300	3A	530 496 634 .. 530 497 296 (+)	663	G		LURP-one-like protein	LURP1-related protein domain; Tubby C-terminal-like domain
TraesCS3A01G296400	3A	531 079 322 .. 531 078 502 (-)	821	G	MF: copper ion transmembrane transporter activity; CC: integral component of membrane; BP: copper ion transmembrane transport	Copper transporter, putative	Ctr copper transporter
TraesCS3A01G296500	3A	531 079 609 .. 531 081 348 (+)	1740	G	MF: ATP binding; MF: ATPase activity	ATP-binding ABC transporter	ABC transporter-like; P-loop containing nucleoside triphosphate hydrolase
TraesCS3A01G296600	3A	531 265 739 .. 531 267 340 (+)	1602	G		Late embryogenesis abundant protein	Root cap
TraesCS3A01G296700	3A	531 446 721 .. 531 451 779 (+)	5059	TE?	MF: protein binding	F-box family protein-like	F-box domain; Leucine-rich repeat domain, L domain-like
TraesCS3A01G296800	3A	531 453 215 .. 531 456 168 (+)	2954	G		F-box protein	FBD domain; Leucine-rich repeat 2; Leucine-rich repeat domain, L domain-like
TraesCS3A01G296900	3A	531 629 481 .. 531 631 366 (+)	1886	G	MF: catalytic activity; BP: cellular amino acid metabolic process; MF: carboxy-lyase activity; BP: carboxylic acid metabolic process; MF: pyridoxal phosphate binding	Tyrosine decarboxylase	Pyridoxal phosphate-dependent decarboxylase; Aromatic-L-amino-acid decarboxylase; Pyridoxal phosphate-dependent transferase, major region, subdomain 1; Pyridoxal phosphate-dependent transferase, subdomain 2; Pyridoxal phosphate-dependent transferase
TraesCS3A01G297000	3A	531 668 656 .. 531 666 757 (-)	1900	G	BP: ubiquitin-dependent protein catabolic process	Skp1-like protein	S-phase kinase-associated protein 1-like; SKP1/BTB/POZ domain; SKP1 component, dimerisation; SKP1 component, POZ domain
TraesCS3A01G297100	3A	531 702 644 .. 531 701 236 (-)	1409	G	MF: peroxidase activity; BP: response to oxidative stress; MF: heme binding; BP: oxidation-reduction process	Peroxidase	Plant peroxidase; Haem peroxidase, plant/fungal/bacterial; Haem peroxidase; Peroxidases heam-ligand binding site; Peroxidase, active site
TraesCS3A01G297200	3A	531 897 487 .. 531 896 075 (-)	1413	G	MF: peroxidase activity; BP: response to oxidative stress; MF: heme binding; BP: oxidation-reduction process	Peroxidase	Plant peroxidase; Haem peroxidase, plant/fungal/bacterial; Haem peroxidase; Peroxidases heam-ligand binding site; Peroxidase, active site
TraesCS3A01G297300	3A	531 944 862 .. 531 943 437 (-)	1426	G	MF: peroxidase activity; BP: response to oxidative stress; MF: heme binding; BP: oxidation-reduction process	Peroxidase	Plant peroxidase; Haem peroxidase, plant/fungal/bacterial; Haem peroxidase; Peroxidases heam-ligand binding site; Peroxidase, active site
TraesCS3A01G297400	3A	532 315 417 .. 532 320 407 (+)	4991	G	MF: diacylglycerol O-acyltransferase activity; BP: glycerolipid biosynthetic process	O-acyltransferase WSD1	O-acyltransferase, WSD1, N-terminal; O-acyltransferase WSD1, C-terminal
TraesCS3A01G297500	3A	532 325 834 .. 532 319 076 (-)	6759	G		Protein PLASTID TRANSCRIPTIONALLY ACTIVE 12
TraesCS3A01G297600	3A	532 338 552 .. 532 331 464 (-)	7089	G	MF: serine-type endopeptidase activity; BP: proteolysis	Subtilisin-like protease	Peptidase S8/S53 domain; Peptidase S8 propeptide/proteinase inhibitor I9; Peptidase S8, subtilisin-related; Peptidase S8, subtilisin, Asp-active site; Peptidase S8, subtilisin, Ser-active site
TraesCS3A01G297700	3A	532 451 430 .. 532 447 933 (-)	3498	G	MF: catalytic activity; BP: lipoate biosynthetic process; MF: lipoate synthase activity; MF: iron-sulfur cluster binding; MF: 4 iron, 4 sulfur cluster binding	Lipoyl synthase	Lipoyl synthase; Elongator protein 3/MiaB/NifB; Radical SAM; Aldolase-type TIM barrel
TraesCS3A01G297800	3A	532 454 012 .. 532 452 789 (-)	1224	G	MF: protein kinase activity; MF: ATP binding; BP: protein phosphorylation	Lectin receptor kinase	Protein kinase domain; Serine/threonine-protein kinase, active site; Protein kinase-like domain; Protein kinase, ATP binding site
TraesCS3A01G297900	3A	532 454 813 .. 532 454 043 (-)	771	G	MF: carbohydrate binding	Lectin receptor kinase	Legume lectin domain; Concanavalin A-like lectin/glucanase domain
TraesCS3A01G298000	3A	532 487 725 .. 532 487 297 (-)	429	G	MF: calcium ion binding	Calcium-binding protein	EF-hand domain; EF-hand domain pair; EF-Hand 1, calcium-binding site
TraesCS3A01G298100	3A	532 488 254 .. 532 488 691 (+)	438	G	MF: calcium ion binding	Calcium-binding protein	EF-hand domain; EF-hand domain pair; EF-Hand 1, calcium-binding site
TraesCS3A01G298200	3A	532 640 354 .. 532 641 654 (+)	1301	G	BP: biosynthetic process; MF: strictosidine synthase activity	Strictosidine synthase	Six-bladed beta-propeller, TolB-like; Strictosidine synthase, conserved region
TraesCS3A01G298300	3A	532 651 047 .. 532 644 983 (-)	6065	G		Protein PAT1-1-like protein
TraesCS3A01G298400	3A	532 670 677 .. 532 663 039 (-)	9717	G		Maternal effect embryo arrest protein
TraesCS3A01G298500	3A	532 844 123 .. 532 846 291 (+)	2169	G		PH-response transcription factor pacC/RIM101 isoform 2
TraesCS3A01G298600	3A	532 851 697 .. 532 846 752 (-)	4946	G	CC: integral component of membrane	transmembrane protein 56	TRAM/LAG1/CLN8 homology domain
TraesCS3A01G298700	3A	532 858 793 .. 532 855 457 (-)	3337	G		XH/XS domain-containing protein	Uncharacterised domain XH
TraesCS3A01G298800	3A	532 938 152 .. 532 934 212 (-)	3941	G	MF: protein binding	Regulatory protein NPR1	BTB/POZ domain; Ankyrin repeat; SKP1/BTB/POZ domain; Ankyrin repeat-containing domain; NPR1/NIM1-like, C-terminal; Regulatory protein NPR, central domain
TraesCS3A01G298900	3A	533 080 811 .. 533 069 292 (-)	11520	TE?	MF: nucleic acid binding; MF: protein binding; MF: ATP binding	ATP-dependent RNA helicase, putative	R3H domain; Helicase, C-terminal; Ankyrin repeat; DEAD/DEAH box helicase domain; Helicase superfamily 1/2, ATP-binding domain; Ankyrin repeat-containing domain; P-loop containing nucleoside triphosphate hydrolase
TraesCS3A01G299000	3A	533 130 743 .. 533 127 931 (-)	2813	G		Tunicamycin induced 1
TraesCS3A01G299100	3A	533 591 395 .. 533 593 230 (+)	1836	TE	MF: nucleic acid binding; MF: zinc ion binding	Retrotransposon protein, putative, unclassified	Zinc finger, CCHC-type; Domain of unknown function DUF4283
TraesCS3A01G299200	3A	533 620 932 .. 533 627 173 (+)	6242	G		Nuclear matrix constituent-like protein 1
TraesCS3A01G299300	3A	533 629 983 .. 533 633 811 (+)	3829	G	MF: hydrolase activity, hydrolyzing O-glycosyl compounds; BP: carbohydrate metabolic process	Glycosyl hydrolase, family 43 protein	Glycoside hydrolase, family 43; Glycosyl hydrolase, five-bladed beta-propellor domain
TraesCS3A01G299400	3A	533 634 805 .. 533 636 774 (+)	1970	G		NAM-like protein	No apical meristem-associated, C-terminal domain
TraesCS3A01G299500	3A	533 658 203 .. 533 662 776 (+)	4574	G		Cellulose synthase	Nucleotide-diphospho-sugar transferases
TraesCS3A01G299600	3A	533 995 361 .. 533 994 146 (-)	1216	G		Fibronectin type III domain-containing protein
TraesCS3A01G299700	3A	534 162 174 .. 534 161 096 (-)	1079	U		transmembrane protein, putative (Protein of unknown function DUF2359, transmembrane)
TraesCS3A01G299800	3A	534 167 182 .. 534 166 083 (-)	1100	G		ARM repeat superfamily protein
TraesCS3A01G299900	3A	534 197 401 .. 534 179 995 (-)	17407	G		BSD domain containing protein	BSD domain
TraesCS3A01G300000	3A	534 185 967 .. 534 186 587 (+)	621	TE?		ATP-dependent RNA helicase DBP7	Uncharacterised conserved protein UCP031279
TraesCS3A01G300100	3A	534 200 246 .. 534 201 046 (+)	801	G		Ubiquinone biosynthesis protein COQ4, mitochondrial	Uncharacterised conserved protein UCP031279
TraesCS3A01G300200	3A	534 323 968 .. 534 324 830 (+)	863	G		Sodium/myo-inositol cotransporter 2	Uncharacterised conserved protein UCP031279
TraesCS3A01G300300	3A	534 364 600 .. 534 367 697 (+)	3098	G		Coiled-coil domain-containing protein 18, putative isoform 1
TraesCS3A01G300400	3A	534 467 102 .. 534 470 083 (+)	2982	G	BP: drug transmembrane transport; MF: drug transmembrane transporter activity; MF: antiporter activity; CC: membrane; BP: transmembrane transport	Protein DETOXIFICATION	Multi antimicrobial extrusion protein
TraesCS3A01G300500	3A	534 478 011 .. 534 478 957 (+)	947	G	MF: calcium ion binding	Calmodulin-like protein	EF-hand domain; EF-hand domain pair; EF-Hand 1, calcium-binding site
TraesCS3A01G300600	3A	534 531 413 .. 534 534 349 (+)	2937	G		extra-large GTP-binding protein 3
TraesCS3A01G300700	3A	534 534 751 .. 534 536 265 (+)	1515	G		Serpin family protein	Serpin, conserved site; Serpin domain
TraesCS3A01G300800	3A	534 550 711 .. 534 536 300 (-)	14242	G	MF: nucleic acid binding	Nucleic acid binding protein	RNA recognition motif domain; Spen paralogue and orthologue SPOC, C-terminal
TraesCS3A01G300900	3A	534 987 566 .. 534 992 062 (+)	4497	G	MF: catalytic activity; MF: zinc ion binding; MF: hydrolase activity	Deoxycytidylate deaminase-like	Cytidine and deoxycytidylate deaminases, zinc-binding; APOBEC/CMP deaminase, zinc-binding; Cytidine deaminase-like
TraesCS3A01G301000	3A	534 995 559 .. 534 997 259 (+)	1701	G	MF: protein binding	Pentatricopeptide repeat-containing protein	Pentatricopeptide repeat; Tetratricopeptide-like helical domain
TraesCS3A01G301100	3A	534 998 411 .. 535 002 929 (+)	4519	G	MF: hydrolase activity, acting on carbon-nitrogen (but not peptide) bonds, in linear amides	Acetamidase/formamidase, putative	Acetamidase/Formamidase
TraesCS3A01G301200	3A	535 007 433 .. 535 003 506 (-)	3928	G		GH3.3	GH3 family
TraesCS3A01G301300	3A	535 169 404 .. 535 167 777 (-)	1628	G		WAT1-related protein
TraesCS3A01G301400	3A	535 189 593 .. 535 183 908 (-)	5599	G	MF: nucleic acid binding; BP: nucleobase-containing compound metabolic process; BP: rRNA processing	Rhodopsin	Putative pre-16S rRNA nuclease; YqgF/RNase H-like domain; Ribonuclease H-like domain
TraesCS3A01G301500	3A	535 190 771 .. 535 194 807 (+)	4037	G	MF: kinase activity	Glutamate 5-kinase	Aspartate/glutamate/uridylate kinase; Fosfomycin resistance kinase, FomA-type
TraesCS3A01G301600	3A	535 195 059 .. 535 199 817 (+)	4759	G	MF: DNA binding; MF: protein binding	Heat shock protein HspQ	UVR domain; Hemimethylated DNA-binding domain
TraesCS3A01G301700	3A	535 200 512 .. 535 200 300 (-)	213	G		protein affected trafficking 2
TraesCS3A01G301800	3A	535 216 244 .. 535 219 824 (+)	3581	G	MF: chorismate mutase activity; BP: aromatic amino acid family biosynthetic process; BP: chorismate metabolic process	Chorismate mutase	Chorismate mutase, AroQ class, eukaryotic type; Chorismate mutase, type II
TraesCS3A01G301900	3A	535 222 098 .. 535 222 892 (+)	795	G	MF: electron carrier activity	Early nodulin-like protein	Phytocyanin domain; Cupredoxin
TraesCS3A01G302000	3A	535 227 936 .. 535 223 999 (-)	3938	G		Sporulation protein RMD1	Domain of unknown function DUF155
TraesCS3A01G302100	3A	535 323 539 .. 535 326 920 (+)	3382	G	MF: protein binding	Glutathione S-transferase	Glutathione S-transferase, N-terminal; Glutathione S-transferase, C-terminal; Glutathione S-transferase, C-terminal-like; Thioredoxin-like fold
TraesCS3A01G302200	3A	535 543 704 .. 535 551 298 (+)	7595	G	MF: protein kinase activity; MF: ATP binding; BP: protein phosphorylation	Receptor-like protein kinase	Protein kinase domain; Serine/threonine-protein kinase, active site; Protein kinase-like domain; Leucine-rich repeat-containing N-terminal, plant-type; Protein kinase, ATP binding site; Leucine-rich repeat domain, L domain-like
TraesCS3A01G302300	3A	535 716 019 .. 535 719 701 (+)	3683	G	MF: protein binding	Glutathione S-transferase	Glutathione S-transferase, N-terminal; Glutathione S-transferase, C-terminal; Glutathione S-transferase, C-terminal-like; Thioredoxin-like fold
TraesCS3A01G302400	3A	535 727 269 .. 535 728 626 (+)	1358	G		Glucan endo-1,3-beta-glucosidase 1	X8 domain
TraesCS3A01G302500	3A	535 824 413 .. 535 826 209 (+)	1797	G		lipase, putative (DUF620)	Protein of unknown function DUF620
TraesCS3A01G302600	3A	536 629 711 .. 536 626 275 (-)	3437	G	CC: exocyst; BP: exocytosis	Exocyst complex component, putative	Exocyst complex component Exo70; Cullin repeat-like-containing domain
TraesCS3A01G302700	3A	536 640 112 .. 536 634 548 (-)	5565	G	BP: lipid metabolic process; MF: phosphoric diester hydrolase activity	Glycerophosphodiester phosphodiesterase	PLC-like phosphodiesterase, TIM beta/alpha-barrel domain; Glycerophosphodiester phosphodiesterase domain
TraesCS3A01G302800	3A	536 774 340 .. 536 778 481 (+)	4142	G		tRNA (guanine-N(1)-)-methyltransferase
TraesCS3A01G302900	3A	536 895 105 .. 536 897 646 (+)	2542	G		TCP family transcription factor containing protein	Transcription factor, TCP; Transcription factor TCP subgroup
QGpc.ippg-3A.5
TraesCS3A01G314200	3A	554 828 431 .. 554 833 639 (+)	5209	G	MF: nucleic acid binding; BP: nucleobase-containing compound metabolic process; MF: 3'-5' exonuclease activity	Werner Syndrome-like exonuclease	3'-5' exonuclease domain; Ribonuclease H-like domain
TraesCS3A01G314300	3A	555 042 846 .. 555 035 056 (-)	7791	G	MF: DNA binding; MF: transcription factor activity, sequence-specific DNA binding; CC: nucleus; BP: regulation of transcription, DNA-templated; MF: protein dimerization activity	Agamous MADS-box transcription factor	Transcription factor, MADS-box; Transcription factor, K-box
TraesCS3A01G314400	3A	555 339 501 .. 555 322 013 (-)	17489	G		lanosterol synthase 1
TraesCS3A01G314500	3A	555 541 354 .. 555 530 458 (-)	10897	G		Dihydroorotase
TraesCS3A01G314600	3A	555 662 519 .. 555 660 688 (-)	1832	G		NADH-quinone oxidoreductase subunit I
TraesCS3A01G314700	3A	555 701 657 .. 555 693 745 (-)	7913	G		NADH-quinone oxidoreductase subunit I
TraesCS3A01G314800	3A	556 260 849 .. 556 260 455 (-)	395	G		LysM domain containing protein	LysM domain
TraesCS3A01G314900	3A	556 340 688 .. 556 340 109 (-)	580	G		LysM domain containing protein	LysM domain
TraesCS3A01G315000		556 353 963 .. 556 353 562 (-)	402			LysM domain containing protein	LysM domain
TraesCS3A01G315100	3A	556 361 160 .. 556 354 721 (-)	6440	G	protein kinase activity; MF: protein serine/threonine kinase activity; MF: protein binding;4 MF: ATP binding; BP: protein phosphorylation; BP: recognition of pollen	Serine/threonine-protein kinase	Protein kinase domain; EGF-like domain; S-locus glycoprotein domain; Serine-threonine/tyrosine-protein kinase, catalytic domain; Bulb-type lectin domain; PAN/Apple domain; Serine/threonine-protein kinase, active site; Protein kinase-like domain; S-locus receptor kinase, C-terminal; S-receptor-like serine/threonine-protein kinase
TraesCS3A01G315200	3A	556 367 108 .. 556 366 509 (-)	600	G		LysM domain containing protein	LysM domain
TraesCS3A01G315300	3A	556 454 549 .. 556 456 340 (+)	1792	G	MF: oxidoreductase activity; BP: oxidation-reduction process	2-oxoglutarate and Fe(II)-dependent oxygenase superfamily protein, putative	Oxoglutarate/iron-dependent dioxygenase; Non-haem dioxygenase N-terminal domain; Isopenicillin N synthase-like
TraesCS3A01G315400	3A	556 458 953 .. 556 459 288 (+)	336	G	MF: calcium ion binding	Calcium-binding family protein	EF-hand domain; EF-hand domain pair; EF-Hand 1, calcium-binding site
TraesCS3A01G315500	3A	556 462 462 .. 556 459 391 (-)	3072	G	MF: ferroxidase activity; CC: mitochondrion; MF: ferric iron binding; BP: iron-sulfur cluster assembly; BP: oxidation-reduction process	Protein CyaY	Frataxin/CyaY; Frataxin; Frataxin conserved site
TraesCS3A01G315600	3A	556 547 493 .. 556 552 618 (+)	5126	G	BP: response to stress	Adenine nucleotide alpha hydrolases-like superfamily protein	Universal stress protein A; UspA; Rossmann-like alpha/beta/alpha sandwich fold
TraesCS3A01G315700	3A	556 553 037 .. 556 555 882 (+)	2846	G		DNA cross-link repair protein	Metallo-beta-lactamase; DNA repair metallo-beta-lactamase
TraesCS3A01G315800	3A	556 660 572 .. 556 666 920 (+)	6349	G	MF: NAD+ kinase activity; MF: diacylglycerol kinase activity; BP: protein kinase C-activating G-protein coupled receptor signaling pathway; BP: metabolic process; MF: kinase activity	Diacylglycerol kinase	Diacylglycerol kinase, accessory domain; Diacylglycerol kinase, catalytic domain; NAD kinase/diacylglycerol kinase-like domain; Diacylglycerol kinase, plant; Inorganic polyphosphate/ATP-NAD kinase, domain 1
TraesCS3A01G315900	3A	556 671 304 .. 556 667 934 (-)	3371	G	MF: protein binding	Pentatricopeptide repeat-containing protein	Pentatricopeptide repeat; Tetratricopeptide-like helical domain
TraesCS3A01G316000	3A	556 678 445 .. 556 678 976 (+)	532	G		LysM domain containing protein	LysM domain
TraesCS3A01G316100	3A	556 683 215 .. 556 683 592 (+)	378	G		LysM domain containing protein	LysM domain
TraesCS3A01G316200	3A	556 696 177 .. 556 691 488 (-)	4690	G	MF: translation initiation factor activity; CC: cytoplasm; CC: eukaryotic translation initiation factor 3 complex	Eukaryotic translation initiation factor 3 subunit L	Translation initiation factor 3 complex subunit L
TraesCS3A01G316300	3A	557 003 347 .. 557 007 063 (+)	3717	G	MF: ion channel activity; BP: ion transport; CC: membrane; BP: transmembrane transport	Cyclic nucleotide-gated channel	Cyclic nucleotide-binding domain; Ion transport domain; RmlC-like jelly roll fold; Cyclic nucleotide-binding-like
TraesCS3A01G316400	3A	557 012 580 .. 557 015 243 (+)	2664	G	MF: oxidoreductase activity; BP: oxidation-reduction process	2-oxoglutarate (2OG) and Fe(II)-dependent oxygenase superfamily protein, putative	Oxoglutarate/iron-dependent dioxygenase; Non-haem dioxygenase N-terminal domain; Isopenicillin N synthase-like
TraesCS3A01G316500	3A	557 021 112 .. 557 016 226 (-)	4887	G	MF: calcium ion binding; MF: oxidoreductase activity; BP: oxidation-reduction process	External alternative NAD(P)H-ubiquinone oxidoreductase B2, mitochondrial	EF-hand domain; EF-hand domain pair; FAD/NAD(P)-binding domain
TraesCS3A01G316600	3A	557 263 642 .. 557 256 842 (-)	6801	G		Protein downstream neighbor of Son	Donson
TraesCS3A01G316700	3A	557 405 559 .. 557 408 266 (+)	2708	G	MF: NAD+ kinase activity; BP: metabolic process; MF: kinase activity	Sphingosine kinase, putative	Diacylglycerol kinase, catalytic domain; NAD kinase/diacylglycerol kinase-like domain; Inorganic polyphosphate/ATP-NAD kinase, domain 1
TraesCS3A01G316800	3A	557 413 353 .. 557 410 354 (-)	3000	G	MF: ADP binding	NBS-LRR-like resistance protein	NB-ARC; Winged helix-turn-helix DNA-binding domain; P-loop containing nucleoside triphosphate hydrolase; Leucine-rich repeat domain, L domain-like
TraesCS3A01G316900	3A	557 418 175 .. 557 416 052 (-)	2124	G	MF: ADP binding	Rp1-like protein	NB-ARC; Winged helix-turn-helix DNA-binding domain; P-loop containing nucleoside triphosphate hydrolase; Leucine-rich repeat domain, L domain-like
TraesCS3A01G317000	3A	557 422 774 .. 557 421 892 (-)	883	G		Vacuolar sorting-associated protein 28-like protein	Vacuolar protein sorting-associated, VPS28; Vacuolar protein sorting-associated, VPS28, N-terminal; Vacuolar protein sorting-associated, VPS28, C-terminal
TraesCS3A01G317100	3A	557 711 552 .. 557 715 732 (+)	4181	G	MF: DNA binding	Ultrapetala	SAND domain
TraesCS3A01G317200	3A	557 916 121 .. 557 914 808 (-)	1314	G	BP: gene silencing by RNA	XH/XS domain-containing protein	Zinc finger-XS domain
TraesCS3A01G317300	3A	557 947 493 .. 557 950 475 (+)	2983	G	MF: protein binding	BTB/POZ domain-containing protein	BTB/POZ domain; SKP1/BTB/POZ domain; NPH3 domain
TraesCS3A01G317400	3A	557 955 443 .. 557 950 412 (-)	5032	G	BP: protein transport; CC: integral component of membrane	Secretory carrier-associated membrane protein	SCAMP
TraesCS3A01G317500	3A	557 964 480 .. 557 955 877 (-)	8604	G	MF: protein binding; MF: microtubule binding; CC: katanin complex; BP: microtubule severing	Katanin p80 WD40 repeat-containing subunit B1 homolog	WD40 repeat; WD40/YVTN repeat-like-containing domain; WD40-repeat-containing domain; WD40 repeat, conserved site; G-protein beta WD-40 repeat; Katanin p80 subunit B1; Katanin p80 subunit, C-terminal
TraesCS3A01G317600	3A	558 515 572 .. 558 516 381 (+)	810	G		Immunoglobulin A1 protease autotransporter
TraesCS3A01G317700	3A	558 881 167 .. 558 891 010 (+)	9844	TE?	MF: protein binding; MF: ATP binding; MF: zinc ion binding	SNF2 domain-containing protein / helicase domain-containing protein	SNF2-related, N-terminal domain; Helicase, C-terminal; IPR001841: Zinc finger, RING-type; Zinc finger, RING/FYVE/PHD-type; Helicase superfamily 1/2, ATP-binding domain; Zinc finger, RING-type, conserved site; P-loop containing nucleoside triphosphate hydrolase
TraesCS3A01G317800	3A	558 893 421 .. 558 891 382 (-)	2040	G	MF: protein kinase activity; MF: ATP binding; BP: protein phosphorylation; MF: carbohydrate binding	Protein kinase	Protein kinase domain; Legume lectin domain; Serine/threonine-protein kinase, active site; Protein kinase-like domain; Concanavalin A-like lectin/glucanase domain; Protein kinase, ATP binding site; Legume lectin, beta chain, Mn/Ca-binding site
TraesCS3A01G317900	3A	559 064 728 .. 559 065 575 (+)	848	G	CC: extracellular region;GO:0009664 BP: plant-type cell wall organization	Expansin	Expansin; Expansin/pollen allergen, DPBB domain; Expansin, cellulose-binding-like domain; Expansin/Lol pI; RlpA-like protein, double-psi beta-barrel domain
TraesCS3A01G318000	3A	559 264 361 .. 559 265 451 (+)	1091	G	CC: extracellular region; BP: plant-type cell wall organization	Expansin	Expansin; Expansin/pollen allergen, DPBB domain; Expansin, cellulose-binding-like domain; Expansin/Lol pI; RlpA-like protein, double-psi beta-barrel domain
TraesCS3A01G318100	3A	559 334 058 .. 559 335 151 (+)	1094	G	CC: extracellular region; BP: plant-type cell wall organization	Expansin	Expansin; Expansin/pollen allergen, DPBB domain; Expansin, cellulose-binding-like domain; Expansin/Lol pI; RlpA-like protein, double-psi beta-barrel domain
TraesCS3A01G318200	3A	559 526 803 .. 559 527 042 (+)	240	G		Serine-rich family protein
TraesCS3A01G318300	3A	559 537 263 .. 559 526 764 (-)	10500	G	MF: catalytic activity; MF: metalloendopeptidase activity; BP: proteolysis; MF: metal ion binding	Insulin-degrading enzyme	Peptidase M16, zinc-binding site; Peptidase M16, C-terminal; Metalloenzyme, LuxS/M16 peptidase-like; Peptidase M16, N-terminal; Peptidase M16, middle/third domain
TraesCS3A01G318400	3A	559 544 910 .. 559 537 938 (-)	6973	G		Vacuole membrane protein, putative	SNARE associated Golgi protein
TraesCS3A01G318500	3A	559 624 953 .. 559 625 795 (+)	843	G		Methylthioribulose-1-phosphate dehydratase
TraesCS3A01G318600	3A	559 813 638 .. 559 813 856 (+)	219	G		Arabinogalactan peptide 14
TraesCS3A01G318700	3A	560 678 422 .. 560 681 595 (+)	3174	G		26S proteasome regulatory subunit S2 1B
TraesCS3A01G318800	3A	561 037 042 .. 561 034 605 (-)	2438	G		Protein upstream of flc	Protein of unknown function DUF966
TraesCS3A01G318900	3A	561 055 342 .. 561 054 897 (-)	446	G		cysteine-rich/transmembrane domain A-like protein	Cysteine-rich transmembrane CYSTM domain
TraesCS3A01G319000	3A	561 059 063 .. 561 063 241 (+)	4179	G		Regulator of chromosome condensation (RCC1) family protein	Regulator of chromosome condensation, RCC1; Regulator of chromosome condensation 1/beta-lactamase-inhibitor protein II
TraesCS3A01G319100	3A	561 090 306 .. 561 119 817 (+)	29512	G	MF: acid phosphatase activity; MF: ATP binding; MF: metal ion binding	Inositol hexakisphosphate and diphosphoinositol-pentakisphosphate kinase	Histidine phosphatase superfamily, clade-2; ATP-grasp fold; Histidine phosphatase superfamily; Histidine acid phosphatase active site
TraesCS3A01G319200	3A	561 121 292 .. 561 119 818 (-)	1475	G	MF: nucleic acid binding	Polyadenylate-binding protein	RNA recognition motif domain
TraesCS3A01G319300	3A	561 247 801 .. 561 246 822 (-)	980	G		Cysteine protease	Cathepsin propeptide inhibitor domain (I29)
TraesCS3A01G319400	3A	561 399 940 .. 561 400 780 (+)	841	TE?		Leucine--tRNA ligase	Myb/SANT-like domain
TraesCS3A01G319500	3A	562 098 249 .. 562 098 470 (+)	222	G		Powder tolerance-related protein
TraesCS3A01G319600	3A	562 101 036 .. 562 102 739 (+)	1704	G	MF: iron ion binding; MF: oxidoreductase activity, acting on paired donors, with incorporation or reduction of molecular oxygen; MF: heme binding; BP: oxidation-reduction process	Cytochrome P450	Cytochrome P450; Cytochrome P450, E-class, group I; EF-Hand 1, calcium-binding site
TraesCS3A01G319700	3A	562 203 118 .. 562 194 668 (-)	8451	G	MF: DNA binding; MF: catalytic activity; MF: nuclease activity; BP: DNA repair; MF: hydrolase activity, acting on ester bonds	Flap endonuclease 1	XPG/Rad2 endonuclease; XPG N-terminal; XPG-I domain; Helix-hairpin-helix motif, class 2; XPG conserved site; 5'-3' exonuclease, C-terminal domain; PIN domain-like
TraesCS3A01G319800	3A	562 289 709 .. 562 283 497 (-)	6213	G	MF: aspartic-type endopeptidase activity; BP: proteolysis	Eukaryotic aspartyl protease family protein	Aspartic peptidase A1 family; Aspartic peptidase domain; Xylanase inhibitor, C-terminal; Xylanase inhibitor, N-terminal; Peptidase family A1 domain
TraesCS3A01G319900	3A	562 356 816 .. 562 349 605 (-)	7212	G		Conserved oligomeric Golgi complex subunit 1
TraesCS3A01G320000	3A	562 571 305 .. 562 570 019 (-)	1287	G		PP2A regulatory subunit TAP46	Protein of unknown function DUF1677, Oryza sativa
TraesCS3A01G320100	3A	562 869 998 .. 562 874 652 (+)	4655	G	MF: acid phosphatase activity; MF: hydrolase activity; MF: metal ion binding	Purple acid phosphatase	Calcineurin-like phosphoesterase domain, ApaH type; Purple acid phosphatase-like, N-terminal; Purple acid phosphatase, N-terminal; Iron/zinc purple acid phosphatase-like C-terminal domain; Metallo-dependent phosphatase-like
TraesCS3A01G320200	3A	562 908 091 .. 562 912 476 (+)	4386	G	MF: protein binding	WD-repeat protein, putative	WD40 repeat; WD40/YVTN repeat-like-containing domain; WD40-repeat-containing domain; WD40 repeat, conserved site
TraesCS3A01G320300	3A	562 914 377 .. 562 915 444 (+)	1068	G	MF: protein binding	BTB/POZ and MATH domain-containing protein 2	BTB/POZ domain; MATH/TRAF domain; TRAF-like; SKP1/BTB/POZ domain
TraesCS3A01G320400	3A	563 386 450 .. 563 385 925 (-)	526	G	MF: protein kinase activity; MF: ATP binding; BP: protein phosphorylation	Receptor kinase	Protein kinase domain; Serine-threonine/tyrosine-protein kinase, catalytic domain; Protein kinase-like domain
TraesCS3A01G320500	3A	563 402 799 .. 563 401 059 (-)	1741	G		Cysteine-rich receptor-kinase-like protein	Gnk2-homologous domain
TraesCS3A01G320600	3A	563 411 265 .. 563 409 613 (-)	1653	G		cysteine-rich RECEPTOR-like kinase	Gnk2-homologous domain
TraesCS3A01G320700	3A	563 835 815 .. 563 830 033 (-)	5783	G	MF: nucleic acid binding	Small RNA degrading nuclease	Ribonuclease H-like domain; Exonuclease, RNase T/DNA polymerase III
TraesCS3A01G320800	3A	564 340 548 .. 564 345 028 (+)	4481	G	MF: protein binding	LisH and RanBPM domains containing protein	LIS1 homology motif; CTLH, C-terminal LisH motif; CRA domain; CTLH/CRA C-terminal to LisH motif domain
TraesCS3A01G320900	3A	564 346 735 .. 564 345 648 (-)	1088	G		Pectate lyase	Pectate lyase/Amb allergen; Pectin lyase fold/virulence factor; Pectin lyase fold; AmbAllergen
TraesCS3A01G321000	3A	564 347 414 .. 564 350 096 (+)	2683	G		Jacalin lectin family protein	Jacalin-like lectin domain
QGpc.ippg-5A.1
TraesCS5A01G072900	5A	84 389 277 .. 84 387 492 (-)	1786	G	CC: SAGA-type complex	Transcriptional adapter 1	Transcriptional coactivator Hfi1/Transcriptional adapter 1
TraesCS5A01G073000	5A	84 896 380 .. 84 894 474 (-)	1907	G	BP: amino acid transmembrane transport; MF: amino acid transmembrane transporter activity; CC: membrane	Amino acid transporter, putative	Amino acid/polyamine transporter I
TraesCS5A01G073100	5A	85 166 337 .. 85 163 778 (-)	2560	G	CC: extracellular region; BP: sexual reproduction	Expansin protein	Major pollen allergen Lol pI; Expansin/pollen allergen, DPBB domain; Expansin, cellulose-binding-like domain; Expansin/Lol pI; RlpA-like protein, double-psi beta-barrel domain
TraesCS5A01G073200	5A	85 255 034 .. 85 256 837 (+)	1804	TE?	MF: protein binding	F-box protein	F-box domain; Six-bladed beta-propeller, TolB-like
TraesCS5A01G073300	5A	85 287 881 .. 85 270 019 (-)	17863	G	MF: ADP binding	Disease resistance protein RPM1	NB-ARC; Winged helix-turn-helix DNA-binding domain; P-loop containing nucleoside triphosphate hydrolase; Leucine-rich repeat domain, L domain-like
TraesCS5A01G073400	5A	85 358 156 .. 85 357 575 (-)	582	G		inosine-uridine preferring nucleoside hydrolase family protein	Protein of unknown function DUF1110
TraesCS5A01G073500	5A	85 780 179 .. 85 787 910 (+)	7732	G	MF: ADP binding	Disease resistance protein RPM1	NB-ARC; Winged helix-turn-helix DNA-binding domain; P-loop containing nucleoside triphosphate hydrolase; Leucine-rich repeat domain, L domain-like
TraesCS5A01G073600	5A	85 860 453 .. 85 819 349 (-)	41105	G	MF: nucleic acid binding; MF: ribonuclease III activity; MF: protein binding; MF: ATP binding; BP: RNA processing; MF: endoribonuclease activity, producing 5'-phosphomonoesters	Endoribonuclease Dicer homolog 3	Ribonuclease III domain; Helicase, C-terminal; PAZ domain; Dicer dimerisation domain; DEAD/DEAH box helicase domain; Helicase superfamily 1/2, ATP-binding domain; Double-stranded RNA-binding domain; P-loop containing nucleoside triphosphate hydrolase
TraesCS5A01G073700	5A	86 166 468 .. 86 167 311 (+)	844	G		Dirigent protein	Plant disease resistance response protein
TraesCS5A01G073800	5A	86 183 272 .. 86 181 804 (-)	1469	G	MF: protein binding	Ubiquitin	Ubiquitin domain; Ubiquitin conserved site; Ubiquitin; Ubiquitin-related domain
TraesCS5A01G073900	5A	86 658 893 .. 86 663 292 (+)	4400	G	MF: transferase activity, transferring glycosyl groups	Hexosyltransferase	Glycosyl transferase, family 8; Nucleotide-diphospho-sugar transferases
TraesCS5A01G074000	5A	86 667 502 .. 86 663 536 (-)	3967	G	CC: membrane; MF: hydrolase activity, acting on glycosyl bonds	Heparanase	Glycoside hydrolase, family 79; Glycoside hydrolase superfamily
TraesCS5A01G074100	5A	87 401 012 .. 87 409 255 (+)	8244	TE?	MF: nucleic acid binding; MF: helicase activity; MF: protein binding; MF: ATP binding; MF: ATP-dependent helicase activity; MF: zinc ion binding	ATP-dependent RNA helicase, putative	Helicase, C-terminal; Zinc finger, RING-type; DNA/RNA helicase, ATP-dependent, DEAH-box type, conserved site; IBR domain; Helicase-associated domain; DEAD/DEAH box helicase domain; Domain of unknown function DUF1605; Zinc finger, RING/FYVE/PHD-type; Zinc finger C2H2-type; Helicase superfamily 1/2, ATP-binding domain; Zinc finger, RING-type, conserved site; P-loop containing nucleoside triphosphat…
TraesCS5A01G074200	5A	87 417 775 .. 87 416 198 (-)	1578	G	MF: ATP binding	ATP-dependent zinc metalloprotease FtsH	AAA+ ATPase domain; ATPase, AAA-type, core; ATPase, AAA-type, conserved site; AAA-type ATPase, N-terminal domain; P-loop containing nucleoside triphosphate hydrolase
TraesCS5A01G074300	5A	87 417 258 .. 87 419 412 (+)	2155	G		dentin sialophosphoprotein-like protein
TraesCS5A01G074400	5A	87 430 384 .. 87 426 541 (-)	3844	G		carboxyl-terminal peptidase (DUF239)	Neprosin
TraesCS5A01G074500	5A	87 896 186 .. 87 891 104 (-)	5083	G		carboxyl-terminal peptidase, putative (DUF239)	Neprosin
TraesCS5A01G074600	5A	87 935 256 .. 87 931 916 (-)	3341	G	MF: nucleic acid binding	RNA-binding protein	RNA recognition motif domain
TraesCS5A01G074700	5A	87 986 634 .. 87 982 462 (-)	4173	G	MF: calmodulin binding	Plant calmodulin-binding-like protein	Calmodulin-binding domain, plant
TraesCS5A01G074800	5A	88 023 582 .. 88 030 536 (+)	6955	G	MF: binding; MF: protein binding; BP: biosynthetic process; MF: nucleotidyltransferase activity	Translation initiation factor eIF-2B subunit epsilon	Hexapeptide repeat; W2 domain; Nucleotidyl transferase domain; Armadillo-type fold; Nucleotide-diphospho-sugar transferases
TraesCS5A01G074900	5A	88 641 053 .. 88 645 923 (+)	4871	G	MF: protein binding	WD-repeat protein, putative	WD40 repeat; LIS1 homology motif; CTLH, C-terminal LisH motif; Six-bladed beta-propeller, TolB-like; WD40-repeat-containing domain
TraesCS5A01G075000	5A	88 988 819 .. 88 991 747 (+)	2929	G	MF: protein binding	Pentatricopeptide repeat-containing protein	Pentatricopeptide repeat; Tetratricopeptide-like helical domain
TraesCS5A01G075100	5A	89 383 581 .. 89 386 098 (+)	2518	G		T-box transcription factor, putative (DUF863)
TraesCS5A01G075200	5A	89 977 633 .. 89 980 514 (+)	2882	G	MF: protein kinase activity; MF: ATP binding; BP: protein phosphorylation	Kinase family protein	Protein kinase domain; Serine/threonine-protein kinase, active site; Protein kinase-like domain; Protein kinase, ATP binding site
TraesCS5A01G075300	5A	90 222 910 .. 90 218 851 (-)	4060	G		Protein ENHANCED DISEASE RESISTANCE 2-like	Protein ENHANCED DISEASE RESISTANCE 2, C-terminal
TraesCS5A01G075400	5A	90 626 133 .. 90 621 620 (-)	4214	TE?	MF: protein binding	F-box family protein	F-box domain; Leucine-rich repeat domain, L domain-like
TraesCS5A01G075500	5A	90 913 931 .. 90 925 320 (+)	11390	G		Formin-like protein	Formin, FH2 domain
TraesCS5A01G075600	5A	90 929 155 .. 90 927 444 (-)	1712	G		Transmembrane protein, putative
TraesCS5A01G075700	5A	91 004 725 .. 91 001 783 (-)	2943	TE	MF: protein binding	Transposon protein, putative, Mutator sub-class	PB1 domain; Transposase, MuDR, plant
TraesCS5A01G075800	5A	91 049 680 .. 91 050 228 (+)	549	TE?		GRF zinc finger family protein
TraesCS5A01G075900	5A	91 129 333 .. 91 118 133 (-)	11201	G	MF: nucleic acid binding	RNA binding protein, putative	RNA recognition motif domain
TraesCS5A01G076000	5A	91 625 405 .. 91 624 657 (-)	749	G		Cysteine protease	Cathepsin propeptide inhibitor domain (I29)
TraesCS5A01G076100	5A	91 812 787 .. 91 810 346 (-)	2442	G		TPX2 (Targeting protein for Xklp2) family protein	TPX2, C-terminal
TraesCS5A01G076200	5A	91 824 751 .. 91 824 894 (+)	144	G	CC: photosystem II; CC: photosystem II reaction center; BP: photosynthesis; CC: membrane	Photosystem II reaction center protein J	Photosystem II PsbJ
TraesCS5A01G076300	5A	92 172 553 .. 92 178 174 (+)	2741	G	MF: NAD+ kinase activity; MF: diacylglycerol kinase activity; BP: protein kinase C-activating G-protein coupled receptor signaling pathway; BP: metabolic process; MF: kinase activity; BP: intracellular signal transduction	Diacylglycerol kinase	Diacylglycerol kinase, accessory domain; Diacylglycerol kinase, catalytic domain; Protein kinase C-like, phorbol ester/diacylglycerol-binding domain; NAD kinase/diacylglycerol kinase-like domain; Inorganic polyphosphate/ATP-NAD kinase, domain 1
TraesCS5A01G076400	5A	92 185 742 .. 92 184 573 (-)	1170	TE		Retrotransposon protein, putative, unclassified
TraesCS5A01G076500	5A	92 197 603 .. 92 195 931 (-)	1673	G	MF: catalytic activity; BP: fatty acid biosynthetic process; BP: metabolic process; CC: membrane; MF: transferase activity, transferring acyl groups other than amino-acyl groups	3-ketoacyl-CoA synthase	Very-long-chain 3-ketoacyl-CoA synthase; FAE1/Type III polyketide synthase-like protein; 3-Oxoacyl-[acyl-carrier-protein (ACP)] synthase III, C-terminal; Thiolase-like
TraesCS5A01G076600	5A	92 204 511 .. 92 201 541 (-)	2971	G	MF: catalytic activity; MF: cation binding	Protein phosphatase 2C-like protein	PPM-type phosphatase, divalent cation binding; PPM-type phosphatase domain
TraesCS5A01G076700	5A	92 208 742 .. 92 209 029 (+)	288	TE	MF: nucleic acid binding	Polynucleotidyl transferase, ribonuclease H-like superfamily protein	Ribonuclease H-like domain
TraesCS5A01G076800	5A	92 442 489 .. 92 428 397 (-)	14093	G	BP: tRNA threonylcarbamoyladenosine modification; MF: metalloendopeptidase activity	tRNA N6-adenosine threonylcarbamoyltransferase	Gcp-like domain; Kae1/TsaD family; tRNA N6-adenosine threonylcarbamoyltransferase, TsaD
TraesCS5A01G076900	5A	92 442 575 .. 92 446 907 (+)	4333	G	MF: acid phosphatase activity; MF: hydrolase activity; MF: metal ion binding	Purple acid phosphatase	Calcineurin-like phosphoesterase domain, ApaH type; Purple acid phosphatase-like, N-terminal; Purple acid phosphatase, N-terminal; Iron/zinc purple acid phosphatase-like C-terminal domain; Metallo-dependent phosphatase-like
TraesCS5A01G077000	5A	93 188 456 .. 93 190 609 (+)	2154	G		Pathogenesis-related thaumatin family protein	Thaumatin
TraesCS5A01G077100	5A	93 197 696 .. 93 199 128 (+)	1433	G		Succinate dehydrogenase [ubiquinone] flavoprotein subunit, mitochondrial	FAD-dependent oxidoreductase 2, FAD binding domain; Succinate dehydrogenase/fumarate reductase flavoprotein, catalytic domain
TraesCS5A01G077200	5A	94 081 999 .. 94 089 104 (+)	7106	G	MF: binding; BP: intracellular protein transport; MF: Ran GTPase binding	Importin subunit beta-1	Importin-beta, N-terminal domain; Armadillo-like helical; IPR016024: Armadillo-type fold
TraesCS5A01G077300	5A	94 092 397 .. 94 092 876 (+)	480	G		Pathogenesis-related thaumatin superfamily protein
TraesCS5A01G077400	5A	94 310 801 .. 94 311 280 (+)	480	G		Pathogenesis-related thaumatin-like protein
QGpc.ippg-5A.2
TraesCS5A01G078000	5A	95 565 265 .. 95 569 289 (+)	4025	G		70 kDa heat shock protein	Heat shock protein 70 family; Heat shock protein 70, conserved site; Heat shock protein 70kD, peptide-binding domain; Heat shock protein 70kD, C-terminal domain
TraesCS5A01G078100	5A	95 868 213 .. 95 870 168 (+)	1956	TE?	MF: DNA binding; BP: regulation of transcription, DNA-templated	Dof zinc finger protein	Zinc finger, Dof-type
TraesCS5A01G078200	5A	96 332 145 .. 96 332 537 (+)	393	G		Protein P
TraesCS5A01G078300	5A	96 415 573 .. 96 414 457 (-)	1117	G		Transcriptional factor B3 family protein	DNA-binding pseudobarrel domain
TraesCS5A01G078400	5A	96 429 953 .. 96 425 153 (-)	4801	G	MF: ubiquitin-protein transferase activity; MF: binding; MF: protein binding; BP: protein ubiquitination	U-box domain-containing protein	Armadillo; U box domain; Armadillo-like helical; Zinc finger, RING/FYVE/PHD-type; Armadillo-type fold
TraesCS5A01G078500	5A	96 983 531 .. 96 985 757 (+)	2227	G	MF: ATP binding; CC: membrane; MF: ATPase activity	ABC transporter G family member	ABC transporter-like; AAA+ ATPase domain; ABC-2 type transporter; ABC transporter, conserved site; P-loop containing nucleoside triphosphate hydrolase
TraesCS5A01G078600	5A	97 224 711 .. 97 229 810 (+)	5100	G		Phosphatidylinositol N-acetyglucosaminlytransferase subunit P-like protein	Domain of unknown function DUF3741; Domain of unknown function DUF4378
TraesCS5A01G078700	5A	97 336 649 .. 97 337 134 (+)	486	G		Phosphoribosyl-AMP cyclohydrolase
TraesCS5A01G078800	5A	97 561 706 .. 97 562 843 (+)	1138	G		Plant regulator RWP-RK family protein
TraesCS5A01G078900	5A	97 565 491 .. 97 563 844 (-)	1648	G		Mitochondrial import inner membrane translocase subunit Tim9	Tim10/DDP family zinc finger
TraesCS5A01G079000	5A	98 033 187 .. 98 038 076 (+)	4890	G	MF: nucleic acid binding	Serine/arginine rich splicing factor, putative	RNA recognition motif domain
TraesCS5A01G079100	5A	98 429 421 .. 98 430 514 (+)	1094	G	MF: DNA binding	Myb transcription factor	SANT/Myb domain; Homeobox domain-like; Myb domain
TraesCS5A01G079200	5A	98 435 667 .. 98 435 870 (+)	204	G		DNA ligase
TraesCS5A01G079300	5A	98 444 653 .. 98 444 417 (-)	237	G		Chromosomal replication initiator protein DnaA
TraesCS5A01G079400	5A	98 455 552 .. 98 450 806 (-)	4747	G		XH/XS domain protein	Uncharacterised domain XH
TraesCS5A01G079500	5A	98 976 678 .. 98 982 449 (+)	5772	G		XH/XS domain-containing protein	Uncharacterised domain XH
TraesCS5A01G079600	5A	99 018 594 .. 99 023 963 (+)	5370	G		XH/XS domain-containing protein	Uncharacterised domain XH
TraesCS5A01G079700	5A	99 102 554 .. 99 104 386 (+)	1833	G		Xyloglucan galactosyltransferase KATAMARI1-like protein	Exostosin-like
TraesCS5A01G079800	5A	99 423 962 .. 99 415 896 (-)	8067	G	MF: nucleic acid binding; MF: protein binding	Ankyrin repeat-containing protein, putative	RNA recognition motif domain; Ankyrin repeat; Zinc finger, RING-type, conserved site; Ankyrin repeat-containing domain; OST-HTH/LOTUS domain
TraesCS5A01G079900	5A	99 553 275 .. 99 556 313 (+)	3039	G		acyl-CoA binding protein 5
TraesCS5A01G080000	5A	99 599 867 .. 99 598 334 (-)	1534	TE		Transposon Ty3-G Gag-Pol polyprotein	Retrotransposon gag domain; Aspartic peptidase domain
TraesCS5A01G080100	5A	99 600 165 .. 99 601 588 (+)	1424	G		WW domain-containing protein
TraesCS5A01G080200	5A	100 349 420 .. 100 348 921 (-)	500	G	CC: nucleosome; MF: DNA binding; MF: protein heterodimerization activity	Histone H3	Histone H3/CENP-A; Histone H2A/H2B/H3; Histone-fold
TraesCS5A01G080300	5A	100 620 981 .. 100 618 093 (-)	2889	G		Scarecrow transcription factor family protein	Transcription factor GRAS
TraesCS5A01G080400	5A	100 711 694 .. 100 709 959 (-)	1736	TE?	MF: protein binding	F-box family protein	F-box domain
QGpc.ippg-5A.3
TraesCS5A01G080600	5A	102 482 913 .. 102 480 805 (-)	2109	G	MF: oxidoreductase activity; BP: oxidation-reduction process	L-lactate dehydrogenase	Lactate/malate dehydrogenase, N-terminal; NAD(P)-binding domain
TraesCS5A01G080700	5A	102 841 986 .. 102 835 883 (-)	6104	G	MF: protein binding	Ubiquitin carboxyl-terminal hydrolase-related protein	Domain of unknown function DUF629; Tetratricopeptide-like helical domain
TraesCS5A01G080800	5A	103 569 104 .. 103 569 337 (+)	234	G		Rotundifolia-like protein	DVL
TraesCS5A01G080900	5A	103 747 912 .. 103 749 844 (+)	1933	TE		Retrovirus-related Pol polyprotein from transposon TNT 1-94
TraesCS5A01G081000	5A	103 910 750 .. 103 907 527 (-)	3224	G		cDNA clone:J013058P10, full insert sequence
TraesCS5A01G081100	5A	104 147 360 .. 104 149 733 (+)	2374	G		cation/H+ exchanger 18
TraesCS5A01G081200	5A	104 257 703 .. 104 230 649 (-)	27055	G		cDNA clone:J013058P10, full insert sequence
TraesCS5A01G081300	5A	104 248 835 .. 104 250 714 (+)	1880	G	BP: proteolysis; MF: cysteine-type peptidase activity	Ubiquitin-like-specific protease 1	Ulp1 protease family, C-terminal catalytic domain
TraesCS5A01G081400	5A	104 637 890 .. 104 616 575 (-)	21316	G	BP: telomere maintenance; CC: nucleus; BP: DNA repair; MF: ATPase activity; CC: Mre11 complex	DNA repair protein Rad50	DNA repair protein Rad50, eukaryotes; RAD50, zinc hook; P-loop containing nucleoside triphosphate hydrolase
TraesCS5A01G081500	5A	104 980 756 .. 104 977 458 (-)	3299	G		Amino acid transporter family protein, putative, expressed	Amino acid transporter, transmembrane domain
TraesCS5A01G081600	5A	105 417 355 .. 105 415 268 (-)	2088	G	MF: protein kinase activity; MF: ATP binding; BP: protein phosphorylation; MF: carbohydrate binding	Lectin receptor kinase	Protein kinase domain; Legume lectin domain; Serine/threonine-protein kinase, active site; Protein kinase-like domain; Concanavalin A-like lectin/glucanase domain; Protein kinase, ATP binding site
TraesCS5A01G081700	5A	105 689 676 .. 105 685 864 (-)	3813	G		Transcription initiation factor TFIID subunit 8	Bromodomain associated domain; Transcription factor TFIID, subunit 8, C-terminal
TraesCS5A01G081800	5A	105 696 121 .. 105 689 737 (-)	6385	G	MF: asparagine synthase (glutamine-hydrolyzing) activity; BP: asparagine biosynthetic process	Asparagine synthetase, putative	Asparagine synthase; Rossmann-like alpha/beta/alpha sandwich fold; Glutamine amidotransferase type 2 domain; Nucleophile aminohydrolases, N-terminal
TraesCS5A01G081900	5A	106 145 561 .. 106 144 470 (-)	1092	G		wiskott-aldrich syndrome family protein, putative (DUF1118)	Protein of unknown function DUF1118
TraesCS5A01G082000	5A	106 146 185 .. 106 148 506 (+)	2322	G		Mitochondrial import receptor subunit TOM5
TraesCS5A01G082100	5A	106 167 428 .. 106 164 115 (-)	3314	G	MF: catalytic activity; CC: nucleolus; BP: ribosome biogenesis	RNA 3-terminal phosphate cyclase-like protein	RNA 3'-terminal phosphate cyclase, insert domain; RNA 3'-terminal phosphate cyclase/enolpyruvate transferase, alpha/beta; RNA 3'-terminal phosphate cyclase type 2; RNA 3'-terminal phosphate cyclase-like, conserved site; RNA 3'-terminal phosphate cyclase domain
TraesCS5A01G082200	5A	106 362 354 .. 106 357 105 (-)	5250	G	MF: nucleic acid binding	APOLLO	Ribonuclease H-like domain; Exonuclease, RNase T/DNA polymerase III
TraesCS5A01G082300	5A	106 732 017 .. 106 728 562 (-)	3456	G		Foldase protein prsA 1
TraesCS5A01G082400	5A	106 751 243 .. 106 747 419 (-)	3825	G	MF: acid phosphatase activity; MF: hydrolase activity; MF: metal ion binding	Purple acid phosphatase	Calcineurin-like phosphoesterase domain, ApaH type; Purple acid phosphatase-like, N-terminal; Purple acid phosphatase, N-terminal; Iron/zinc purple acid phosphatase-like C-terminal domain; Metallo-dependent phosphatase-like
TraesCS5A01G082500	5A	106 855 853 .. 106 854 894 (-)	960	G		Pathogenesis-related thaumatin family protein	Thaumatin
TraesCS5A01G082600	5A	107 393 508 .. 107 387 319 (-)	6190	G	MF: binding; BP: intracellular protein transport; MF: Ran GTPase binding	Importin subunit beta-1	Importin-beta, N-terminal domain; Armadillo-like helical; Armadillo-type fold
TraesCS5A01G082700	5A	107 446 232 .. 107 444 890 (-)	1343	G		CASP-like protein	Domain of unknown function DUF588
TraesCS5A01G082800	5A	108 281 446 .. 108 279 551 (-)	1896	G	MF: RNA binding; MF: structural constituent of ribosome; CC: intracellular; CC: ribosome; BP: translation; CC: large ribosomal subunit	50S ribosomal protein L2	Ribosomal protein L2; Translation protein SH3-like domain; Nucleic acid-binding, OB-fold; Ribosomal protein L2 domain 2; Ribosomal protein L2, domain 3; Ribosomal Proteins L2, RNA binding domain; Ribosomal protein L2, C-terminal; Ribosomal protein L2, conserved site; Ribosomal protein L2, archaeal-type
TraesCS5A01G082900	5A	108 577 777 .. 108 589 429 (+)	11653	G	MF: protein kinase activity; MF: protein binding; MF: ATP binding; BP: protein phosphorylation	Receptor-like protein kinase	Protein kinase domain; Serine-threonine/tyrosine-protein kinase, catalytic domain; Leucine-rich repeat; Serine/threonine-protein kinase, active site; Protein kinase-like domain; Protein kinase, ATP binding site; Malectin-like carbohydrate-binding domain; Leucine-rich repeat domain, L domain-like
TraesCS5A01G083000	5A	108 744 421 .. 108 744 672 (+)	252	G		Ribosomal RNA small subunit methyltransferase G
TraesCS5A01G083100	5A	109 278 949 .. 109 280 355 (+)	1407	G	MF: DNA binding	MYB transcription factor	SANT/Myb domain; Homeobox domain-like; Myb-like domain; Myb domain
TraesCS5A01G083200	5A	109 291 360 .. 109 281 401 (-)	9960	G	CC: cytoplasm; MF: diaminopimelate epimerase activity; BP: lysine biosynthetic process via diaminopimelate	Diaminopimelate epimerase	Diaminopimelate epimerase, DapF; Diaminopimelate epimerase, active site
TraesCS5A01G083300	5A	109 293 763 .. 109 298 561 (+)	4799	TE?		ATP-dependent RNA helicase
TraesCS5A01G083400	5A	109 300 931 .. 109 301 137 (+)	207	G		Nuclear transport factor 2 (NTF2)-like protein
TraesCS5A01G083500	5A	109 334 484 .. 109 334 963 (+)	480	G		SWAP (Suppressor-of-White-APricot)/surp domain-containing protein
TraesCS5A01G083600	5A	109 335 524 .. 109 343 348 (+)	7825	G		UNC93-like protein	Ion channel regulatory protein, UNC-93; Major facilitator superfamily domain
TraesCS5A01G083700	5A	109 344 540 .. 109 343 703 (-)	838	G		Keratinocyte proline-rich protein
TraesCS5A01G083800	5A	109 668 491 .. 109 668 841 (+)	351	G	MF: intramolecular transferase activity; BP: cellulose biosynthetic process	Alpha-1,4-glucan-protein synthase [UDP-forming]	Reversibly glycosylated polypeptide family
TraesCS5A01G083900	5A	109 928 722 .. 109 932 309 (+)	3588	G		UNC93-like protein	Ion channel regulatory protein, UNC-93; Major facilitator superfamily domain
TraesCS5A01G084000	5A	109 940 352 .. 109 942 970 (+)	2619	G		UNC93-like protein	Ion channel regulatory protein, UNC-93; Major facilitator superfamily domain
TraesCS5A01G084100	5A	109 950 488 .. 109 954 077 (+)	3590	G	MF: hydrolase activity, acting on ester bonds	GDSL esterase/lipase	GDSL lipase/esterase
TraesCS5A01G084200	5A	109 956 909 .. 109 967 540 (+)	10632	G	MF: protein kinase activity; MF: calcium ion binding; MF: protein binding; MF: ATP binding; BP: protein phosphorylation; MF: polysaccharide binding	Protein kinase family protein	EGF-type aspartate/asparagine hydroxylation site; Protein kinase domain; EGF-like domain; EGF-like calcium-binding domain; Serine/threonine-protein kinase, active site; Protein kinase-like domain; Protein kinase, ATP binding site; EGF-like calcium-binding, conserved site; Wall-associated receptor kinase, galacturonan-binding domain
TraesCS5A01G084300	5A	109 968 112 .. 109 967 442 (-)	671	G		forkhead box protein G1
TraesCS5A01G084400	5A	110 354 444 .. 110 352 267 (-)	2178	G	MF: protein kinase activity; MF: ATP binding; BP: protein phosphorylation; MF: carbohydrate binding	Protein kinase	Protein kinase domain; Legume lectin domain; Serine-threonine/tyrosine-protein kinase, catalytic domain; Serine/threonine-protein kinase, active site; Protein kinase-like domain; Concanavalin A-like lectin/glucanase domain; Protein kinase, ATP binding site; Legume lectin, beta chain, Mn/Ca-binding site
TraesCS5A01G084500	5A	110 371 109 .. 110 362 002 (-)	9108	TE?	MF: protein binding	Zinc finger C3H1 domain-containing protein	Tetratricopeptide-like helical domain; Putative zinc-finger domain
TraesCS5A01G084600	5A	110 374 535 .. 110 371 742 (-)	2794	G		Membrane magnesium transporter	Magnesium transporter
TraesCS5A01G084700	5A	110 382 892 .. 110 377 966 (-)	4927	G		Succinate--CoA ligase [ADP-forming] subunit beta	ATP-grasp fold, succinyl-CoA synthetase-type; Succinyl-CoA synthetase-like; ATP-citrate synthase, citrate-binding domain
TraesCS5A01G084800	5A	110 671 233 .. 110 662 218 (-)	9016	G		Protein MODIFIER OF SNC1 1
TraesCS5A01G084900	5A	111 553 921 .. 111 555 581 (+)	1661	G		1-(5-phosphoribosyl)-5-[(5-phosphoribosylamino)methylideneamino] imidazole-4-carboxamide isomerase
TraesCS5A01G085000	5A	111 588 730 .. 111 590 895 (+)	2166	G	MF: DNA binding	Wuschel-related homeobox protein	Homeobox domain; Homeobox domain-like
TraesCS5A01G085100	5A	111 609 801 .. 111 621 356 (+)	11556	G		Complex 1 LYR protein	Complex 1 LYR protein
TraesCS5A01G085200	5A	111 627 719 .. 111 623 081 (-)	4936	G	BP: anion transport; CC: integral component of membrane	Boron transporter	Bicarbonate transporter, C-terminal
QGpc.ippg-5B.1
TraesCS5B01G052000	5B	56 979 146 .. 56 981 064 (+)	1919	G	BP: lipid metabolic process; BP: metabolic process	Patatin	Patatin-like phospholipase domain; Acyl transferase/acyl hydrolase/lysophospholipase
TraesCS5B01G052100	5B	57 433 696 .. 57 437 858 (+)	4163	TE?	MF: nucleic acid binding; MF: ATP binding	ATP-dependent RNA helicase	Helicase, C-terminal; DEAD/DEAH box helicase domain; Helicase superfamily 1/2, ATP-binding domain; RNA helicase, DEAD-box type, Q motif; P-loop containing nucleoside triphosphate hydrolase
TraesCS5B01G052200	5B	57 492 148 .. 57 490 866 (-)	1283	TE?	MF: protein binding	F-box family protein	F-box domain
TraesCS5B01G052300	5B	57 494 669 .. 57 492 615 (-)	2055	G		Protein EXORDIUM-like 1	Phosphate-induced protein 1
TraesCS5B01G052400	5B	57 498 701 .. 57 497 598 (-)	1104	G	MF: protein binding	BTB/POZ domain containing protein	BTB/POZ domain; MATH/TRAF domain; TRAF-like; SKP1/BTB/POZ domain
TraesCS5B01G052500	5B	57 507 729 .. 57 509 654 (+)	1926	G	MF: protein binding	BTB/POZ domain containing protein, expressed	BTB/POZ domain; MATH/TRAF domain; TRAF-like; SKP1/BTB/POZ domain
TraesCS5B01G052600	5B	57 513 666 .. 57 513 403 (-)	264	G	MF: hydrogen ion transmembrane transporter activity; BP: ATP synthesis coupled proton transport; CC: proton-transporting ATP synthase complex, coupling factor F(o)	ATP synthase subunit b, chloroplastic	ATP synthase, F0 complex, subunit b/b', bacterial/chloroplast
TraesCS5B01G052700	5B	57 515 468 .. 57 513 927 (-)	1542	G	MF: hydrogen ion transmembrane transporter activity; BP: ATP synthesis coupled proton transport; BP: ATP hydrolysis coupled proton transport; CC: proton-transporting two-sector ATPase complex, proton-transporting domain; CC: proton-transporting ATP synthase complex, coupling factor F(o)	ATP synthase subunit c, chloroplastic	ATP synthase, F0 complex, subunit C; V-ATPase proteolipid subunit C-like domain; ATP synthase, F0 complex, subunit C, bacterial/chloroplast; ATP synthase, F0 complex, subunit C, DCCD-binding site
TraesCS5B01G052800	5B	57 516 132 .. 57 516 305 (+)	174	G		Cytochrome c-550
TraesCS5B01G052900	5B	57 684 395 .. 57 685 917 (+)	1523	G	MF: protein binding	Transcription factor GTE4-like protein	Bromodomain
TraesCS5B01G053000	5B	57 698 817 .. 57 704 468 (+)	5652	G		Cytosolic Fe-S cluster assembly factor NAR1	Iron hydrogenase, small subunit; Iron hydrogenase, large subunit, C-terminal; Iron hydrogenase
TraesCS5B01G053100	5B	57 968 299 .. 57 961 736 (-)	6564	G	MF: nucleotide binding; MF: aminoacyl-tRNA editing activity; MF: aminoacyl-tRNA ligase activity; MF: valine-tRNA ligase activity; MF: ATP binding; BP: tRNA aminoacylation for protein translation; BP: valyl-tRNA aminoacylation	Valine--tRNA ligase	Aminoacyl-tRNA synthetase, class Ia; Valine-tRNA ligase; Valyl/Leucyl/Isoleucyl-tRNA synthetase, editing domain; Aminoacyl-tRNA synthetase, class Ia, anticodon-binding; Methionyl/Valyl/Leucyl/Isoleucyl-tRNA synthetase, anticodon-binding; Rossmann-like alpha/beta/alpha sandwich fold
TraesCS5B01G053200	5B	57 983 127 .. 57 979 928 (-)	3200	TE?		Serine/threonine-protein phosphatase 7 long form like	Protein of unknown function DUF724; Aminotransferase-like, plant mobile domain
TraesCS5B01G053300	5B	58 192 937 .. 58 190 167 (-)	2771	TE?		RING-finger, DEAD-like helicase, PHD and SNF2 domain-containing protein	Protein of unknown function DUF3615
TraesCS5B01G053400	5B	58 398 319 .. 58 395 284 (-)	3036	G	MF: oxidoreductase activity; BP: oxidation-reduction process	2-oxoglutarate and Fe(II)-dependent oxygenase superfamily protein, putativ	Oxoglutarate/iron-dependent dioxygenase; Non-haem dioxygenase N-terminal domain; Isopenicillin N synthase-like
TraesCS5B01G053500	5B	58 570 892 .. 58 563 721 (-)	7172	G	MF: actin binding	Stomatal closure-related actin-binding protein 1	Stomatal closure-related actin-binding protein, coiled-coil domain; Stomatal closure-related actin-binding protein, actin-binding domain; Stomatal closure-related actin-binding protein, fused Ig-PH domain
TraesCS5B01G053600	5B	58 757 946 .. 58 756 834 (-)	1113	G	MF: protein kinase activity; MF: ATP binding; BP: protein phosphorylation	Kinase family protein	Protein kinase domain; Serine/threonine-protein kinase, active site; Protein kinase-like domain
TraesCS5B01G053700	5B	58 886 022 .. 58 888 729 (+)	2708	G		Myb/SANT-like DNA-binding domain protein
TraesCS5B01G053800	5B	58 891 249 .. 58 894 696 (+)	3448	G	MF: protein kinase activity; MF: ATP binding; BP: protein phosphorylation	Receptor-like kinase	Protein kinase domain; Serine-threonine/tyrosine-protein kinase, catalytic domain; Serine/threonine-protein kinase, active site; Protein kinase-like domain; Protein kinase, ATP binding site
TraesCS5B01G053900	5B	58 898 670 .. 58 895 657 (-)	3014	G	MF: nucleic acid binding; MF: DNA binding; CC: nucleus; BP: regulation of transcription, DNA-templated	Tuftelin-interacting protein 11	G-patch domain; Tuftelin interacting protein, N-terminal domain; GC-rich sequence DNA-binding factor domain; Septin and tuftelin interacting protein
TraesCS5B01G054000	5B	59 156 511 .. 59 160 220 (+)	3710	TE?		Zinc finger protein LSD1	Zinc finger, LSD1-type
TraesCS5B01G054100	5B	59 161 209 .. 59 163 166 (+)	1958	G		CASP-like protein	Casparian strip membrane protein; Domain of unknown function DUF588
TraesCS5B01G054200	5B	59 170 277 .. 59 165 228 (-)	5050	G	MF: DNA binding; BP: regulation of transcription, DNA-templated	NAC domain-containing protein	NAC domain
TraesCS5B01G054300	5B	59 180 969 .. 59 174 797 (-)	6173	G		Protein RRNAD1	Methyltransferase domain; IPR029063: S-adenosyl-L-methionine-dependent methyltransferase
TraesCS5B01G054400	5B	59 645 667 .. 59 647 455 (+)	1789	G		Protein kinase superfamily protein
TraesCS5B01G054500	5B	59 779 959 .. 59 779 621 (-)	339	TE	MF: nucleic acid binding	Polynucleotidyl transferase, ribonuclease H-like superfamily protein	Ribonuclease H-like domain
TraesCS5B01G054600	5B	59 791 457 .. 59 792 519 (+)	1063	G	MF: protein binding; MF: zinc ion binding	E3 ubiquitin-protein ligase	Zinc finger, RING-type; Zinc finger, RING/FYVE/PHD-type; Zinc finger, RING-type, conserved site; RING-type zinc-finger, LisH dimerisation motif
TraesCS5B01G054700	5B	59 911 766 .. 59 906 340 (-)	5427	G	MF: protein binding	Serine protease HtrA-like	PDZ domain; Peptidase S1, PA clan
TraesCS5B01G054800	5B	59 928 225 .. 59 926 012 (-)	2214	G	MF: protein dimerization activity	Basic helix-loop-helix transcription factor	Myc-type, basic helix-loop-helix (bHLH) domain
QGpc.ippg-5B.2
TraesCS5B01G244200	5B	425 870 484 .. 425 876 388 (+)	5905	G		Protein curvature thylakoid chloroplastic-like	Cyanobacterial aminoacyl-tRNA synthetase, CAAD domain
TraesCS5B01G244300	5B	425 878 385 .. 425 884 028 (+)	5644	G	MF: glucose-6-phosphate isomerase activity; BP: gluconeogenesis; BP: glycolytic process	Glucose-6-phosphate isomerase (Yang2020)	Phosphoglucose isomerase (PGI); Phosphoglucose isomerase, conserved site
TraesCS5B01G244400	5B	425 887 196 .. 425 883 970 (-)	3227	G		RING finger protein
TraesCS5B01G244500	5B	426 063 608 .. 426 067 326 (+)	3719	G	MF: phosphoribosylaminoimidazolesuccinocarboxamide synthase activity; BP: purine nucleotide biosynthetic process	Phosphoribosylaminoimidazole-succinocarboxamide synthase	SAICAR synthetase, conserved site; SAICAR synthetase/ADE2, N-terminal
TraesCS5B01G244600	5B	426 079 367 .. 426 080 105 (+)	739	G	BP: proteolysis; MF: cysteine-type peptidase activity	Ulp1 protease family, C-terminal catalytic domain containing protein, expressed	Ulp1 protease family, C-terminal catalytic domain
TraesCS5B01G244700	5B	426 086 669 .. 426 087 433 (+)	765	G	MF: protein binding	Glutathione S-transferase	Glutathione S-transferase, N-terminal; Glutathione S-transferase, C-terminal; Glutathione S-transferase, C-terminal-like; Thioredoxin-like fold
TraesCS5B01G244800	5B	426 134 572 .. 426 131 167 (-)	3406	G		Purine permease-like protein
TraesCS5B01G244900	5B	426 251 312 .. 426 246 484 (-)	4829	G		Purine permease-like protein
TraesCS5B01G245000	5B	426 366 506 .. 426 358 681 (-)	7826	G		Purine permease-like protein
TraesCS5B01G245100	5B	426 520 360 .. 426 512 013 (-)	8348	G		Purine permease-like protein
TraesCS5B01G245200	5B	426 533 763 .. 426 534 026 (+)	264	G		SsrA-binding protein
TraesCS5B01G245300	5B	426 566 220 .. 426 558 282 (-)	7939	G	MF: transporter activity; BP: transport; CC: membrane	Peptide transporter	Proton-dependent oligopeptide transporter family; Major facilitator superfamily domain
TraesCS5B01G245400	5B	426 585 989 .. 426 589 020 (+)	3032	G	BP: drug transmembrane transport; MF: drug transmembrane transporter activity; MF: antiporter activity; CC: membrane; BP: transmembrane transport	Protein DETOXIFICATION	Multi antimicrobial extrusion protein
TraesCS5B01G245500	5B	426 590 594 .. 426 592 936 (+)	2343	G	BP: drug transmembrane transport; MF: drug transmembrane transporter activity; MF: antiporter activity; CC: membrane; BP: transmembrane transport	Protein DETOXIFICATION	Multi antimicrobial extrusion protein
TraesCS5B01G245600	5B	426 621 823 .. 426 620 573 (-)	1251	G		Clathrin assembly protein	ENTH/VHS
TraesCS5B01G245700	5B	426 652 014 .. 426 650 802 (-)	1213	G		Heat shock protein	Alpha crystallin/Hsp20 domain; HSP20-like chaperone
TraesCS5B01G245800	5B	426 995 057 .. 426 993 279 (-)	1779	G	MF: protein binding; MF: zinc ion binding	Ring finger protein, putative	Zinc finger, RING-type; Zinc finger, RING/FYVE/PHD-type
TraesCS5B01G245900	5B	427 238 477 .. 427 240 453 (+)	1977	G	MF: protein dimerization activity	Basic helix-loop-helix transcription factor	Myc-type, basic helix-loop-helix (bHLH) domain
TraesCS5B01G246000	5B	427 249 456 .. 427 247 852 (-)	1605	G	MF: protein binding; MF: zinc ion binding	Ring finger protein, putative	Zinc finger, RING-type; Zinc finger, RING/FYVE/PHD-type
TraesCS5B01G246100	5B	427 330 309 .. 427 332 633 (+)	2325	G		Plastid-targeted protein 4
TraesCS5B01G246200	5B	427 822 686 .. 427 823 915 (+)	1230	G	MF: electron carrier activity	Blue copper protein	Phytocyanin domain; Cupredoxin; Blue (type 1) copper protein, binding site
TraesCS5B01G246300	5B	427 914 024 .. 427 915 068 (+)	1045	G	MF: electron carrier activity	Blue copper protein	Phytocyanin domain; Cupredoxin; Blue (type 1) copper protein, binding site
TraesCS5B01G246400	5B	427 940 495 .. 427 928 916 (-)	11580	G	MF: catalytic activity; MF: hydrolase activity, hydrolyzing O-glycosyl compounds; BP: carbohydrate metabolic process	1,4-alpha-glucan branching enzyme GlgB	Glycoside hydrolase, family 13, N-terminal; Glycosyl hydrolase, family 13, catalytic domain; Immunoglobulin-like fold; Immunoglobulin E-set; Glycoside hydrolase superfamily
TraesCS5B01G246500	5B	428 119 782 .. 428 126 508 (+)	6727	G	BP: tRNA modification; MF: queuine tRNA-ribosyltransferase activity; MF: transferase activity, transferring pentosyl groups; BP: tRNA-guanine transglycosylation	Queuine tRNA-ribosyltransferase	tRNA-guanine(15) transglycosylase-like; tRNA-guanine transglycosylase
TraesCS5B01G246600	5B	428 127 294 .. 428 131 743 (+)	4450	G	MF: transporter activity; BP: sodium ion transport; CC: membrane; BP: transmembrane transport	2-oxoglutarate/malate translocator, chloroplastic	Solute carrier family 13
TraesCS5B01G246700	5B	428 461 602 .. 428 462 604 (+)	1003	G	MF: DNA binding; MF: transcription factor activity, sequence-specific DNA binding; BP: regulation of transcription, DNA-templated; MF: sequence-specific DNA binding	Homeobox protein, putative	Helix-turn-helix motif; Homeobox domain; Leucine zipper, homeobox-associated; Homeobox domain-like; Homeobox, conserved site
TraesCS5B01G246800	5B	428 575 065 .. 428 581 945 (+)	6881	G	MF: transcription corepressor activity; BP: transcription, DNA-templated	Protein SCAI	Protein SCAI
TraesCS5B01G246900	5B	428 963 597 .. 428 960 273 (-)	3325	G	MF: peroxidase activity; BP: response to oxidative stress; MF: heme binding; BP: oxidation-reduction process	Peroxidase	Plant peroxidase; Haem peroxidase, plant/fungal/bacterial; Haem peroxidase; Peroxidases heam-ligand binding site; Peroxidase, active site
TraesCS5B01G247000	5B	429 037 682 .. 429 038 212 (+)	531	G	MF: NADH dehydrogenase (ubiquinone) activity; BP: oxidation-reduction process	NAD(P)H-quinone oxidoreductase subunit 6, chloroplastic	NADH:ubiquinone/plastoquinone oxidoreductase, chain 6
TraesCS5B01G247100	5B	429 038 425 .. 429 038 727 (+)	303	G	MF: oxidoreductase activity, acting on NAD(P)H; BP: ATP synthesis coupled electron transport; BP: oxidation-reduction process	NADH-quinone oxidoreductase subunit K	NADH-ubiquinone oxidoreductase chain 4L/K
TraesCS5B01G247200	5B	429 064 479 .. 429 064 288 (-)	192	G	MF: structural constituent of ribosome; BP: translation; CC: large ribosomal subunit	50S ribosomal protein L32, chloroplastic	Ribosomal protein L32p; Zinc-binding ribosomal protein
TraesCS5B01G247300	5B	429 067 744 .. 429 067 037 (-)	708	G	MF: protein kinase activity; MF: ATP binding; BP: protein phosphorylation	Protein kinase family protein	Protein kinase domain; Serine/threonine-protein kinase, active site; Protein kinase-like domain
TraesCS5B01G247400	5B	429 097 373 .. 429 093 034 (-)	4340	G	MF: protein kinase activity; MF: calcium ion binding; MF: protein binding;GO:0005524 MF: ATP binding; BP: protein phosphorylation; MF: polysaccharide binding	Protein kinase family protein	Protein kinase domain; EGF-like domain; EGF-like calcium-binding domain; Serine/threonine-protein kinase, active site; Protein kinase-like domain; Protein kinase, ATP binding site; Wall-associated receptor kinase, galacturonan-binding domain
TraesCS5B01G247500	5B	429 421 839 .. 429 418 872 (-)	2968	G	MF: protein kinase activity; MF: calcium ion binding; MF: protein binding; MF: ATP binding; BP: protein phosphorylation	Protein kinase family protein	EGF-type aspartate/asparagine hydroxylation site; Protein kinase domain; EGF-like domain; EGF-like calcium-binding domain; Serine/threonine-protein kinase, active site; Growth factor receptor cysteine-rich domain; Protein kinase-like domain; Protein kinase, ATP binding site; EGF-like calcium-binding, conserved site
TraesCS5B01G247600	5B	429 614 247 .. 429 621 971 (+)	7725	G	MF: RNA binding; MF: methyltransferase activity; MF: tRNA (cytosine-5-)-methyltransferase activity	Ribosomal RNA small subunit methyltransferase F	SAM-dependent methyltransferase RsmB/NOP2-type; Bacterial Fmu (Sun)/eukaryotic nucleolar NOL1/Nop2p, conserved site; RNA (C5-cytosine) methyltransferase; tRNA (C5-cytosine) methyltransferase, NCL1; S-adenosyl-L-methionine-dependent methyltransferase
QGpc.ippg-5D
TraesCS5D01G538300	5D	550 512 440 .. 550 509 636 (-)	2805	G		Sec14p-like phosphatidylinositol transfer family protein	CRAL-TRIO lipid binding domain; CRAL/TRIO, N-terminal domain
TraesCS5D01G538400	5D	550 576 764 .. 550 576 252 (-)	513	G		40S ribosomal protein
TraesCS5D01G538500	5D	550 580 048 .. 550 578 051 (-)	1998	G		Sec14p-like phosphatidylinositol transfer family protein	CRAL-TRIO lipid binding domain; CRAL/TRIO, N-terminal domain
TraesCS5D01G538600	5D	550 612 488 .. 550 610 875 (-)	1614	G		Sec14p-like phosphatidylinositol transfer family protein	CRAL-TRIO lipid binding domain; CRAL/TRIO, N-terminal domain
TraesCS5D01G538700	5D	550 639 047 .. 550 637 277 (-)	1771	G		Sec14p-like phosphatidylinositol transfer family protein	CRAL-TRIO lipid binding domain; CRAL/TRIO, N-terminal domain
TraesCS5D01G538800	5D	550 643 635 .. 550 639 426 (-)	4210	G		Transferase, transferring glycosyl groups
TraesCS5D01G538900	5D	550 646 167 .. 550 647 143 (+)	977	G	MF: electron carrier activity	Basic blue protein	Phytocyanin domain; Cupredoxin; Blue (type 1) copper protein, binding site
TraesCS5D01G539000	5D	550 660 636 .. 550 661 377 (+)	742	G	MF: electron carrier activity	Basic blue protein, putative	Phytocyanin domain; Cupredoxin; Blue (type 1) copper protein, binding site
TraesCS5D01G539100	5D	550 922 068 .. 550 953 048 (+)	30981	G	MF: protein kinase activity; MF: protein binding; MF: ATP binding; BP: protein phosphorylation	receptor kinase 1	Protein kinase domain; WD40 repeat; Serine/threonine-protein kinase, active site; PapD-like; Protein kinase-like domain; Immunoglobulin-like fold; WD40/YVTN repeat-like-containing domain; Protein kinase, ATP binding site; WD40-repeat-containing domain; WD40 repeat, conserved site
TraesCS5D01G539200	5D	550 964 729 .. 550 965 417 (+)	689	G	MF: electron carrier activity	Basic blue protein	Phytocyanin domain; Cupredoxin; Blue (type 1) copper protein, binding site
TraesCS5D01G539300	5D	551 021 005 .. 551 016 402 (-)	2604	G		2-oxoglutarate (2OG) and Fe(II)-dependent oxygenase superfamily protein
TraesCS5D01G539400	5D	551 021 902 .. 551 021 496 (-)	407	G		Ubiquitin-fold modifier-conjugating enzyme 1
TraesCS5D01G539500	5D	551 024 562 .. 551 025 407 (+)	846	G	MF: electron carrier activity	Basic blue protein, putative	Phytocyanin domain; Cupredoxin; Blue (type 1) copper protein, binding site
TraesCS5D01G539600	5D	551 057 521 .. 551 059 388 (+)	1868	TE?	MF: protein binding	F-box and associated interaction domains-containing protein	F-box domain; Galactose oxidase/kelch, beta-propeller
TraesCS5D01G539700	5D	551 073 776 .. 551 075 597 (+)	1822	TE?	MF: protein binding	F-box family protein	F-box domain
TraesCS5D01G539800	5D	551 086 895 .. 551 084 946 (-)	1950	TE?	MF: protein binding	F-box family protein	F-box domain
TraesCS5D01G539900	5D	551 120 033 .. 551 121 290 (+)	1258	TE?		F-box domain containing protein, expressed
TraesCS5D01G540000	5D	551 244 220 .. 551 242 362 (-)	1859	G	BP: metabolic process; MF: transferase activity, transferring hexosyl groups	Glycosyltransferase	UDP-glucuronosyl/UDP-glucosyltransferase
TraesCS5D01G540100	5D	551 447 654 .. 551 449 330 (+)	1677	ТЕ?		F-box domain containing protein, expressed
TraesCS5D01G540200	5D	551 470 264 .. 551 467 456 (-)	2809	ТЕ?	MF: protein binding	F-box family protein	F-box domain; Leucine-rich repeat domain, L domain-like
TraesCS5D01G540300	5D	551 546 279 .. 551 543 850 (-)	2430	ТЕ?		F-box/RNI-like superfamily protein	Leucine-rich repeat domain, L domain-like
TraesCS5D01G540400	5D	551 744 385 .. 551 746 234 (+)	1850	ТЕ?	MF: protein binding	F-box family protein	F-box domain
TraesCS5D01G540500	5D	551 830 756 .. 551 837 735 (+)	6980	G	MF: protein binding; MF: ADP binding	NBS-LRR disease resistance protein-like	Leucine-rich repeat; NB-ARC; Leucine-rich repeat, cysteine-containing subtype; Winged helix-turn-helix DNA-binding domain; P-loop containing nucleoside triphosphate hydrolase; Leucine-rich repeat domain, L domain-like
TraesCS5D01G540600	5D	551 880 156 .. 551 881 355 (+)	1200	G		NBS-LRR disease resistance protein-like protein	Leucine-rich repeat domain, L domain-like
TraesCS5D01G540700	5D	551 925 247 .. 551 924 615 (-)	633	G		TRAF-like superfamily protein	Protein of unknown function DUF3123
TraesCS5D01G540800	5D	551 990 390 .. 551 994 460 (+)	4071	G	MF: 3-beta-hydroxy-delta5-steroid dehydrogenase activity; BP: steroid biosynthetic process; MF: oxidoreductase activity, acting on the CH-OH group of donors, NAD or NADP as acceptor; BP: oxidation-reduction process	Cinnamoyl-CoA reductase 4	3-beta hydroxysteroid dehydrogenase/isomerase; NAD(P)-binding domain
TraesCS5D01G540900	5D	552 028 660 .. 552 027 448 (-)	1213	G		Structural maintenance of chromosomes protein
TraesCS5D01G541000	5D	552 033 725 .. 552 031 887 (-)	1839	ТЕ?		F-box domain containing protein
TraesCS5D01G541100	5D	552 036 203 .. 552 047 398 (+)	11196	G	MF: catalytic activity; MF: coenzyme binding	Alcohol dehydrogenase-like protein	NAD-dependent epimerase/dehydratase; NAD(P)-binding domain
TraesCS5D01G541200	5D	552 042 532 .. 552 040 877 (-)	1656	ТЕ?	MF: protein binding	F-box family protein	F-box domain
TraesCS5D01G541300	5D	552 051 718 .. 552 049 622 (-)	2097	ТЕ?	MF: protein binding	F-box and associated interaction domains-containing protein	F-box domain
TraesCS5D01G541400	5D	552 052 462 .. 552 052 892 (+)	431	G		Homoserine kinase
TraesCS5D01G541500	5D	552 129 803 .. 552 127 438 (-)	2366	ТЕ?	MF: protein binding	FBD-associated F-box protein	F-box domain; Leucine-rich repeat domain, L domain-like
TraesCS5D01G541600	5D	552 407 352 .. 552 409 908 (+)	2557	G		Disease resistance protein (CC-NBS-LRR class) family	Leucine-rich repeat domain, L domain-like
TraesCS5D01G541700	5D	552 422 850 .. 552 420 976 (-)	1875	ТЕ?	MF: protein binding	F-box family protein	F-box domain
TraesCS5D01G541800	5D	552 444 243 .. 552 442 265 (-)	1979	ТЕ?	MF: protein binding	F-box and associated interaction domains-containing protein	F-box domain
TraesCS5D01G541900	5D	552 683 347 .. 552 688 698 (+)	5352	ТЕ?	MF: protein binding	F-box family protein	F-box domain; Leucine-rich repeat domain, L domain-like
TraesCS5D01G542000	5D	552 699 153 .. 552 697 172 (-)	1982	G		nodulin MtN21 /EamA-like transporter family protein	Ref' Miao
TraesCS5D01G542100		552 707 655 .. 552 711 763 (+)	4109	ТЕ?		F-box/RNI-like superfamily protein
TraesCS5D01G542200	5D	552 729 006 .. 552 731 184 (+)	2179	ТЕ?	MF: protein binding	F-box family protein	F-box domain; Leucine-rich repeat domain, L domain-like
TraesCS5D01G542300	5D	552 784 999 .. 552 781 100 (-)	3900	G	MF: translation elongation factor activity; MF: GTPase activity; MF: GTP binding; CC: intracellular; BP: translational elongation	Elongation factor Tu	Transcription factor, GTP-binding domain; Translation elongation factor EFTu/EF1A, C-terminal; Translation elongation factor EFTu-like, domain 2; Translation elongation factor EFTu/EF1A, bacterial/organelle; Small GTP-binding protein domain; Translation protein, beta-barrel domain; Translation elongation factor EF1A/initiation factor IF2gamma, C-terminal; P-loop containing nucleoside triphosphate…
TraesCS5D01G542400	5D	552 789 118 .. 552 792 885 (+)	3768	G	MF: electron carrier activity; MF: protein disulfide oxidoreductase activity; BP: cell redox homeostasis	Glutaredoxin	Glutaredoxin; Monothiol glutaredoxin-related; Thioredoxin-like fold
TraesCS5D01G542500	5D	552 861 276 .. 552 857 038 (-)	4239	G	MF: ADP binding	NBS-LRR disease resistance protein-like protein	NB-ARC; Winged helix-turn-helix DNA-binding domain; P-loop containing nucleoside triphosphate hydrolase; Leucine-rich repeat domain, L domain-like
TraesCS5D01G542600	5D	552 916 586 .. 552 920 893 (+)	4308	G	MF: protein kinase activity; MF: protein binding; MF: ATP binding; BP: protein phosphorylation	Receptor-like protein kinase	Protein kinase domain; Serine-threonine/tyrosine-protein kinase, catalytic domain; Leucine-rich repeat; Serine/threonine-protein kinase, active site; Protein kinase-like domain; Protein kinase, ATP binding site; Malectin-like carbohydrate-binding domain; Leucine-rich repeat domain, L domain-like
TraesCS5D01G542700	5D	553 061 105 .. 553 059 995 (-)	1111	G	MF: protein kinase activity; BP: protein phosphorylation	protein kinase family protein	Serine-threonine/tyrosine-protein kinase, catalytic domain; Protein kinase-like domain
TraesCS5D01G542800	5D	553 064 001 .. 553 065 104 (+)	1104	G	MF: protein kinase activity; MF: ATP binding; BP: protein phosphorylation	Protein kinase family protein	Protein kinase domain; Serine/threonine-protein kinase, active site; Protein kinase-like domain; Protein kinase, ATP binding site
TraesCS5D01G542900	5D	553 421 944 .. 553 421 483 (-)	462	G		BLN1-3
TraesCS5D01G543000	5D	553 469 660 .. 553 473 445 (+)	3786	G	MF: protein kinase activity; MF: protein binding; MF: ATP binding; BP: protein phosphorylation	Receptor-kinase, putative	Protein kinase domain; Leucine-rich repeat; Leucine-rich repeat, typical subtype; Serine/threonine-protein kinase, active site; Protein kinase-like domain; Leucine-rich repeat-containing N-terminal, plant-type; Protein kinase, ATP binding site; Leucine-rich repeat domain, L domain-like
TraesCS5D01G543100	5D	553 505 587 .. 553 507 131 (+)	1545	G		Monothiol glutaredoxin-S7, chloroplastic	Protein of unknown function DUF3681
TraesCS5D01G543200	5D	553 627 025 .. 553 625 548 (-)	1478	ТЕ?	MF: protein binding	F-box family protein	F-box domain; Leucine-rich repeat domain, L domain-like
TraesCS5D01G543300	5D	553 654 500 .. 553 656 255 (+)	1756	G	BP: lipid metabolic process; MF: O-acyltransferase activity	Lecithin-cholesterol acyltransferase-like 1	Lecithin:cholesterol/phospholipid:diacylglycerol acyltransferase; Alpha/Beta hydrolase fold
TraesCS5D01G543400	5D	553 670 542 .. 553 669 748 (-)	795	ТЕ?	MF: zinc ion binding	GRF zinc finger family protein, expressed	Zinc finger, GRF-type
TraesCS5D01G543500	5D	553 677 096 .. 553 671 725 (-)	5372	G	MF: DNA binding; MF: protein kinase activity; MF: ATP binding; CC: nucleus; BP: protein phosphorylation	receptor kinase 1	Protein kinase domain; CG-1 DNA-binding domain; Serine/threonine-protein kinase, active site; Protein kinase-like domain; Protein kinase, ATP binding site
TraesCS5D01G543600	5D	553 682 289 .. 553 677 633 (-)	4657	G	MF: protein binding	26S proteasome non-ATPase regulatory subunit	Proteasome component (PCI) domain; Tetratricopeptide-like helical domain; Winged helix-turn-helix DNA-binding domain
TraesCS5D01G543700	5D	553 758 473 .. 553 770 993 (+)	12521	ТЕ?	MF: protein binding	F-box family protein	F-box domain; Galactose oxidase/kelch, beta-propeller; Kelch-type beta propeller
TraesCS5D01G543800	5D	553 774 408 .. 553 771 781 (-)	2628	G		Malonyl-coenzyme A:anthocyanin 3-O-glucoside-6''-O-malonyltransferase	Protein of unknown function DUF3615
TraesCS5D01G543900	5D	553 883 840 .. 553 878 630 (-)	5211	G		Lactoylglutathione lyase / glyoxalase I family protein	Protein of unknown function DUF3615
TraesCS5D01G544000	5D	553 904 008 .. 553 909 042 (+)	5035	G		U2 small nuclear ribonucleoprotein A	Leucine-rich repeat domain, L domain-like
TraesCS5D01G544100	5D	553 910 502 .. 553 913 630 (+)	3129	G		Sodium/potassium-transporting ATPase subunit alpha-1	Protein of unknown function DUF594; Domain of unknown function DUF4220
TraesCS5D01G544200	5D	553 957 094 .. 553 962 795 (+)	5702	G	CC: integral component of membrane; BP: transmembrane transport	Protein ZINC INDUCED FACILITATOR-LIKE 1	Major facilitator superfamily; Major facilitator superfamily domain
TraesCS5D01G544300	5D	553 974 031 .. 553 963 269 (-)	10763	G	MF: nucleic acid binding; MF: DNA binding; MF: ADP binding	Disease resistance protein (NBS-LRR class) family	Receptor L-domain; NB-ARC; Zinc finger, BED-type; Winged helix-turn-helix DNA-binding domain; Zinc finger C2H2-type; P-loop containing nucleoside triphosphate hydrolase; Leucine-rich repeat domain, L domain-like
TraesCS5D01G544400	5D	553 975 447 .. 553 985 486 (+)	10040	TE		Transposon protein, putative, Pong sub-class, expressed	No apical meristem-associated, C-terminal domain
TraesCS5D01G544500	5D	554 140 790 .. 554 147 036 (+)	6247	G	MF: ADP binding	Disease resistance protein (NBS-LRR class) family	Receptor L-domain; NB-ARC; Winged helix-turn-helix DNA-binding domain; P-loop containing nucleoside triphosphate hydrolase; Leucine-rich repeat domain, L domain-like
TraesCS5D01G544600	5D	554 201 049 .. 554 201 162 (+)	114	G	CC: cytochrome b6f complex	Cytochrome b6-f complex subunit 5	Cytochrome b6/f complex, subunit 5
TraesCS5D01G544700	5D	554 343 235 .. 554 350 082 (+)	6848	G	MF: nucleic acid binding; MF: DNA binding; MF: ADP binding	NBS-LRR disease resistance protein-like protein	NB-ARC; Zinc finger, BED-type; Winged helix-turn-helix DNA-binding domain; Zinc finger C2H2-type; P-loop containing nucleoside triphosphate hydrolase; Leucine-rich repeat domain, L domain-like
TraesCS5D01G544800	5D	554 357 761 .. 554 361 636 (+)	3876	G		FRIGIDA-like protein, putative	Frigida-like
TraesCS5D01G544900	5D	554 361 911 .. 554 364 605 (+)	2695	G		NAD-dependent malic enzyme
TraesCS5D01G545000	5D	554 402 715 .. 554 395 705 (-)	7011	G	CC: integral component of membrane; BP: transmembrane transport	Protein ZINC INDUCED FACILITATOR-LIKE 1	Major facilitator superfamily; Major facilitator superfamily domain
TraesCS5D01G545100	5D	554 467 387 .. 554 473 144 (+)	5758	G	MF: protein binding	Transducin/WD-like repeat-protein	WD40 repeat; WD40/YVTN repeat-like-containing domain; WD40-repeat-containing domain
TraesCS5D01G545200	5D	554 474 523 .. 554 476 661 (+)	2139	G	MF: protein binding	Ankyrin repeat domain protein, putative	Ankyrin repeat; Ankyrin repeat-containing domain
TraesCS5D01G545300	5D	554 478 656 .. 554 482 011 (+)	3356	G	MF: protein binding; MF: identical protein binding	Pentatricopeptide repeat-containing protein	Pentatricopeptide repeat; Tetratricopeptide TPR-4; Tetratricopeptide-like helical domain
TraesCS5D01G545400	5D	554 500 792 .. 554 504 058 (+)	3267	G	MF: protein binding	Pentatricopeptide repeat-containing protein	Pentatricopeptide repeat; Tetratricopeptide-like helical domain
TraesCS5D01G545500	5D	554 504 695 .. 554 507 113 (+)	2419	G	MF: pantoate-beta-alanine ligase activity; BP: pantothenate biosynthetic process	Pantothenate synthetase	Pantoate-beta-alanine ligase; Rossmann-like alpha/beta/alpha sandwich fold
TraesCS5D01G545600	5D	554 507 514 .. 554 508 921 (+)	1408	G		Aspartic proteinase nepenthesin-1	Aspartic peptidase domain; Xylanase inhibitor, C-terminal; Xylanase inhibitor, N-terminal; Peptidase family A1 domain
TraesCS5D01G545700	5D	554 521 375 .. 554 519 487 (-)	1889	G	MF: oxidoreductase activity	Tropinone reductase-like protein	Short-chain dehydrogenase/reductase SDR; NAD(P)-binding domain; Short-chain dehydrogenase/reductase, conserved site
TraesCS5D01G545800	5D	554 577 516 .. 554 575 145 (-)	2372	G	MF: oxidoreductase activity	Tropinone reductase-like protein	Short-chain dehydrogenase/reductase SDR; NAD(P)-binding domain; Short-chain dehydrogenase/reductase, conserved site
TraesCS5D01G545900	5D	554 614 810 .. 554 600 305 (-)	14506	G		carboxyl-terminal peptidase, putative (DUF239)	Neprosin; Neprosin activation peptide
TraesCS5D01G546000	5D	554 774 647 .. 554 817 302 (+)	42656	G		carboxyl-terminal peptidase (DUF239)	Neprosin
TraesCS5D01G546100	5D	554 854 338 .. 554 851 030 (-)	3309	G	BP: protein transport; CC: membrane	Protein transport protein Sec61 subunit alpha	SecY/SEC61-alpha family; Translocon Sec61/SecY, plug domain; SecY subunit domain	Fatiukha
TraesCS5D01G546200	5D	554 929 626 .. 554 924 833 (-)	4794	G		carboxyl-terminal peptidase, putative (DUF239)	Neprosin; Neprosin activation peptide
TraesCS5D01G546300	5D	555 027 751 .. 555 017 942 (-)	9810	G		carboxyl-terminal peptidase, putative (DUF239)	Neprosin; Neprosin activation peptide
TraesCS5D01G546400	5D	555 046 085 .. 555 047 707 (+)	1623	G	MF: protein binding	Leucine-rich repeat receptor kinase-like protein	Leucine-rich repeat; Leucine-rich repeat, typical subtype; Leucine-rich repeat-containing N-terminal, plant-type; Leucine-rich repeat domain, L domain-like
TraesCS5D01G546500	5D	555 049 090 .. 555 049 407 (+)	318	G		protein kinase family protein	Protein kinase-like domain
TraesCS5D01G546600	5D	555 071 814 .. 555 068 318 (-)	3497	G	MF: ADP binding	Disease resistance protein RPM1	NB-ARC; Winged helix-turn-helix DNA-binding domain; P-loop containing nucleoside triphosphate hydrolase; Leucine-rich repeat domain, L domain-like
TraesCS5D01G546700	5D	555 190 940 .. 555 193 147 (+)	2208	G	MF: protein kinase activity; MF: ATP binding; BP: protein phosphorylation; MF: carbohydrate binding	Receptor lectin kinase	Protein kinase domain; Legume lectin domain; Serine/threonine-protein kinase, active site; Protein kinase-like domain; Concanavalin A-like lectin/glucanase domain; Protein kinase, ATP binding site
TraesCS5D01G546800	5D	555 231 788 .. 555 232 345 (+)	558	G	MF: structural constituent of ribosome; CC: intracellular; CC: ribosome; BP: translation; MF: rRNA binding	50S ribosomal protein L16	Ribosomal protein L16; Ribosomal protein L10e/L16; Ribosomal protein L16, conserved site
TraesCS5D01G546900	5D	555 321 881 .. 555 325 787 (+)	3907	G	MF: protein kinase activity; MF: protein binding; MF: ATP binding; BP: protein phosphorylation	Receptor-like protein kinase	Protein kinase domain; Leucine-rich repeat; Serine/threonine-protein kinase, active site; Protein kinase-like domain; Protein kinase, ATP binding site; Leucine-rich repeat domain, L domain-like
TraesCS5D01G547000	5D	555 413 920 .. 555 415 061 (+)	1142	G		DNA topoisomerase
TraesCS5D01G547100	5D	555 434 089 .. 555 425 310 (-)	8780	G	MF: ADP binding	Disease resistance protein (NBS-LRR class) family	NB-ARC; Leucine-rich repeat, typical subtype; Leucine-rich repeat, cysteine-containing subtype; P-loop containing nucleoside triphosphate hydrolase; Leucine-rich repeat domain, L domain-like
TraesCS5D01G547200	5D	555 456 784 .. 555 446 470 (-)	10315	G	MF: ADP binding	Disease resistance protein RPM1	NB-ARC; Winged helix-turn-helix DNA-binding domain; P-loop containing nucleoside triphosphate hydrolase; Leucine-rich repeat domain, L domain-like
TraesCS5D01G547300	5D	555 501 646 .. 555 502 947 (+)	1302	G	MF: protein binding	Leucine-rich repeat receptor kinase-like protein	Leucine-rich repeat; Leucine-rich repeat, typical subtype; Leucine-rich repeat domain, L domain-like
TraesCS5D01G547400	5D	555 504 166 .. 555 504 899 (+)	734	G	MF: protein kinase activity; MF: ATP binding; BP: protein phosphorylation	Receptor-like kinase	Protein kinase domain; Serine-threonine/tyrosine-protein kinase, catalytic domain; Protein kinase-like domain
TraesCS5D01G547500	5D	555 555 819 .. 555 559 333 (+)	3515	G	MF: protein kinase activity; MF: protein binding; MF: ATP binding; BP: protein phosphorylation	Receptor-like protein kinase	Protein kinase domain; Leucine-rich repeat; Serine/threonine-protein kinase, active site; Protein kinase-like domain; Protein kinase, ATP binding site; Leucine-rich repeat domain, L domain-like
TraesCS5D01G547600	5D	555 635 845 .. 555 639 490 (+)	3646	G	MF: protein kinase activity; MF: protein binding; MF: ATP binding; BP: protein phosphorylation	Receptor-like protein kinase	Protein kinase domain; Leucine-rich repeat; Leucine-rich repeat, typical subtype; Serine/threonine-protein kinase, active site; Protein kinase-like domain; Leucine-rich repeat-containing N-terminal, plant-type; Protein kinase, ATP binding site; Leucine-rich repeat domain, L domain-like
TraesCS5D01G547700	5D	555 649 929 .. 555 649 126 (-)	804	G		Disease resistance protein	Leucine-rich repeat domain, L domain-like
TraesCS5D01G547800	5D	555 660 289 .. 555 657 286 (-)	3004	G	MF: ADP binding	Disease resistance protein RPM1	NB-ARC; Winged helix-turn-helix DNA-binding domain; P-loop containing nucleoside triphosphate hydrolase; Leucine-rich repeat domain, L domain-like
TraesCS5D01G547900	5D	555 869 233 .. 555 868 823 (-)	411	TE	MF: nucleic acid binding	Retrotransposon protein, putative, unclassified	Ribonuclease H-like domain
TraesCS5D01G548000	5D	555 906 766 .. 555 908 610 (+)	1845	G	MF: protein binding	Leucine-rich repeat receptor kinase-like protein	Leucine-rich repeat; Leucine-rich repeat, typical subtype; Leucine-rich repeat-containing N-terminal, plant-type; Leucine-rich repeat domain, L domain-like
TraesCS5D01G548100	5D	555 908 625 .. 555 910 196 (+)	1572	G	MF: protein kinase activity; MF: protein binding; MF: ATP binding; BP: protein phosphorylation	Receptor-like protein kinase	Protein kinase domain; Serine-threonine/tyrosine-protein kinase, catalytic domain; Leucine-rich repeat; Serine/threonine-protein kinase, active site; Protein kinase-like domain; Protein kinase, ATP binding site; Leucine-rich repeat domain, L domain-like
TraesCS5D01G548200	5D	555 917 347 .. 555 913 017 (-)	4331	G	MF: ADP binding	Disease resistance protein RPM1	NB-ARC; Winged helix-turn-helix DNA-binding domain; P-loop containing nucleoside triphosphate hydrolase; Leucine-rich repeat domain, L domain-like
TraesCS5D01G548300	5D	555 932 166 .. 555 928 153 (-)	4014	G	MF: ADP binding	Disease resistance protein RPM1	NB-ARC; Winged helix-turn-helix DNA-binding domain; P-loop containing nucleoside triphosphate hydrolase; Leucine-rich repeat domain, L domain-like
TraesCS5D01G548400	5D	556 017 062 .. 556 006 335 (-)	10728	G	MF: ADP binding	Disease resistance protein RPM1	NB-ARC; Winged helix-turn-helix DNA-binding domain; P-loop containing nucleoside triphosphate hydrolase; Leucine-rich repeat domain, L domain-like
TraesCS5D01G548500	5D	556 065 038 .. 556 059 843 (-)	5196	G	MF: ADP binding	Disease resistance protein	NB-ARC; Winged helix-turn-helix DNA-binding domain; P-loop containing nucleoside triphosphate hydrolase; Leucine-rich repeat domain, L domain-like
TraesCS5D01G548600	5D	556 111 607 .. 556 107 151 (-)	4457	G	MF: ADP binding	Disease resistance protein RPM1	NB-ARC; Winged helix-turn-helix DNA-binding domain; P-loop containing nucleoside triphosphate hydrolase; Leucine-rich repeat domain, L domain-like
TraesCS5D01G548700	5D	556 141 869 .. 556 138 668 (-)	3202	G	BP: fatty acid metabolic process; BP: fatty acid biosynthetic process; MF: oxidoreductase activity; MF: acyl-[acyl-carrier-protein] desaturase activity; BP: oxidation-reduction process	Acyl-[acyl-carrier-protein] desaturase	Fatty acid desaturase, type 2; Fatty acid desaturase type 2, conserved site; Ferritin-like superfamily
TraesCS5D01G548800	5D	556 226 556 .. 556 234 436 (+)	7881	G	MF: protein binding	Transducin/WD-like repeat-protein	WD40 repeat; Six-bladed beta-propeller, TolB-like; WD40-repeat-containing domain; WD40 repeat, conserved site
TraesCS5D01G548900	5D	556 273 657 .. 556 272 642 (-)	1016	G	MF: transporter activity; BP: transport; CC: membrane	Aquaporin-like protein	Major intrinsic protein; Major intrinsic protein, conserved site; Aquaporin-like
QGpc.ippg-6A.1
TraesCS6A01G241700	6A	453 552 714 .. 453 553 244 (+)	531	U		Unknown protein
TraesCS6A01G241800	6A	453 572 489 .. 453 570 216 (-)	2274	G	BP: regulation of cyclin-dependent protein serine/threonine kinase activity; MF: protein kinase binding	Cyclin-like	Cyclin P/U; Cyclin-like; Cyclin PHO80-like
TraesCS6A01G241900	6A	453 686 294 .. 453 685 848 (-)	447	G		3-oxoacyl-[acyl-carrier-protein] synthase 3
TraesCS6A01G242000	6A	453 827 944 .. 453 824 658 (-)	3287	G	MF: transcription factor activity, sequence-specific DNA binding; BP: regulation of transcription, DNA-templated; MF: sequence-specific DNA binding	WRKY transcription factor	WRKY domain
TraesCS6A01G242100	6A	453 871 714 .. 453 868 215 (-)	3500	G		ELMO domain-containing protein, putative	ELMO domain
TraesCS6A01G242200	6A	453 907 282 .. 453 903 818 (-)	3465	G	CC: endoplasmic reticulum membrane	Vesicle-associated protein 1-1	Major sperm protein (MSP) domain; PapD-like; Immunoglobulin-like fold; Vesicle-associated membrane-protein-associated protein
TraesCS6A01G242300	6A	453 911 749 .. 453 908 254 (-)	3496	G	MF: structural constituent of ribosome; CC: intracellular; CC: ribosome; BP: translation	50S ribosomal protein L19	Ribosomal protein L19; Translation protein SH3-like domain
TraesCS6A01G242400	6A	454 091 478 .. 454 094 172 (+)	2695	G	MF: transporter activity; BP: transport; CC: integral component of membrane; BP: transmembrane transport	Glycerol-3-phosphate transporter	Sugar phosphate transporter; Major facilitator superfamily; Major facilitator superfamily domain
TraesCS6A01G242500	6A	454 349 733 .. 454 348 532 (-)	1202	G	MF: electron carrier activity	Blue copper protein	Phytocyanin domain; Cupredoxin
TraesCS6A01G242600	6A	454 390 682 .. 454 385 997 (-)	4686	G	MF: transferase activity, transferring acyl groups other than amino-acyl groups	Shikimate/quinate hydroxycinnamoyl transferase	Transferase
TraesCS6A01G242700	6A	454 545 950 .. 454 548 173 (+)	2224	G	BP: lipid metabolic process	Phospholipase a1-chloroplastic-like	Fungal lipase-like domain; Alpha/Beta hydrolase fold
TraesCS6A01G242800	6A	454 646 497 .. 454 650 205 (+)	3709	G	MF: protein kinase activity; MF: ATP binding; BP: protein phosphorylation	Kinase family protein	Protein kinase domain; Serine/threonine-protein kinase, active site; Protein kinase-like domain
TraesCS6A01G242900	6A	454 657 880 .. 454 648 252 (-)	9629	G	CC: transcription factor TFIID complex; BP: DNA-templated transcription, initiation	Transcription initiation factor TFIID subunit 4b	Transcription initiation factor TFIID component TAF4; RST domain of plant C-terminal
TraesCS6A01G243000	6A	454 675 273 .. 454 679 707 (+)	4435	G	MF: thiol-dependent ubiquitin-specific protease activity; CC: intracellular; BP: ubiquitin-dependent protein catabolic process	Ubiquitin carboxyl-terminal hydrolase	Peptidase C12, ubiquitin carboxyl-terminal hydrolase
TraesCS6A01G243100	6A	454 681 656 .. 454 679 710 (-)	1947	G		bZIP transcription factor (DUF630 and DUF632)	Domain of unknown function DUF632; Domain of unknown function DUF630
TraesCS6A01G243200	6A	454 706 798 .. 454 708 469 (+)	1672	G		Pleiotropic drug resistance ABC transporter
TraesCS6A01G243300	6A	454 712 683 .. 454 710 994 (-)	1690	G	MF: DNA binding; MF: transcription factor activity, sequence-specific DNA binding; BP: regulation of transcription, DNA-templated	Ethylene-responsive transcription factor	AP2/ERF domain; DNA-binding domain
TraesCS6A01G243400	6A	454 804 396 .. 454 810 913 (+)	6518	G		UPF0565 protein C2orf69	Uncharacterised protein family UPF0565; Alpha/Beta hydrolase fold
TraesCS6A01G243500	6A	454 934 116 .. 454 935 078 (+)	963	G	MF: DNA binding; MF: transcription factor activity, sequence-specific DNA binding; BP: regulation of transcription, DNA-templated	Ethylene-responsive transcription factor	AP2/ERF domain; DNA-binding domain
TraesCS6A01G243600	6A	454 945 597 .. 454 939 508 (-)	6090	G	BP: metabolic process	3-isopropylmalate dehydratase small subunit	Aconitase A/isopropylmalate dehydratase small subunit, swivel domain; Aconitase/3-isopropylmalate dehydratase, swivel
TraesCS6A01G243700	6A	455 043 016 .. 455 046 105 (+)	3090	G		PPPDE thiol peptidase family protein, putative	PPPDE putative peptidase domain
TraesCS6A01G243800	6A	455 050 306 .. 455 046 593 (-)	3714	G		Alpha/beta-hydrolase superfamily protein	Domain of unknown function DUF676, lipase-like; Alpha/Beta hydrolase fold
TraesCS6A01G243900	6A	455 317 798 .. 455 314 339 (-)	3460	G	MF: hydrolase activity, hydrolyzing O-glycosyl compounds; BP: carbohydrate metabolic process	Beta xylosidase	Glycoside hydrolase, family 3, N-terminal; Glycoside hydrolase family 3 C-terminal domain; Immunoglobulin-like fold; Glycoside hydrolase superfamily; Fibronectin type III-like domain
TraesCS6A01G244000	6A	455 458 171 .. 455 463 717 (+)	5547	G	MF: NAD+ kinase activity; BP: metabolic process; MF: kinase activity	Ceramide kinase	Diacylglycerol kinase, catalytic domain; PH domain-like; NAD kinase/diacylglycerol kinase-like domain; Inorganic polyphosphate/ATP-NAD kinase, domain 1
TraesCS6A01G244100	6A	455 644 568 .. 455 646 567 (+)	2000	G	MF: protein kinase activity; MF: ATP binding; BP: protein phosphorylation	Protein kinase	Protein kinase domain; Protein kinase-like domain
TraesCS6A01G244200	6A	455 649 834 .. 455 658 360 (+)	8527	TE		Retrovirus-related Pol polyprotein from transposon TNT 1-94
TraesCS6A01G244400	6A	455 708 513 .. 455 704 714 (-)	3800	G	BP: amino acid transmembrane transport; MF: amino acid transmembrane transporter activity; CC: membrane	Cationic amino acid transporter, putative	Amino acid/polyamine transporter I; Cationic amino acid transporter, C-terminal
TraesCS6A01G244500	6A	455 822 203 .. 455 821 754 (-)	450	G	MF: protein binding; MF: zinc ion binding	RING/U-box superfamily protein	Zinc finger, RING-type; Zinc finger, RING/FYVE/PHD-type
TraesCS6A01G244600	6A	455 936 783 .. 455 939 743 (+)	2961	G		Transmembrane protein-like protein	SRP-independent targeting protein 2/TMEM208
TraesCS6A01G244700	6A	455 942 133 .. 455 940 511 (-)	1623	G	MF: transporter activity; CC: membrane; BP: transmembrane transport	Purine-uracil permease NCS1	Purine-cytosine permease
TraesCS6A01G244800	6A	455 985 662 .. 455 984 747 (-)	916	G		Late embryogenesis abundant (LEA) hydroxyproline-rich glycoprotein family, putative	Late embryogenesis abundant protein, LEA-14; Immunoglobulin-like fold
TraesCS6A01G244900	6A	456 011 328 .. 456 014 499 (+)	3172	G	MF: iron ion binding; MF: oxidoreductase activity, acting on paired donors, with incorporation or reduction of molecular oxygen; MF: heme binding; BP: oxidation-reduction process	Cytochrome P450	Cytochrome P450; Cytochrome P450, E-class, group I; Cytochrome P450, conserved site
QGpc.ippg-6A.2
TraesCS6A01G394000	6A	607 883 919 .. 607 881 028 (-)	2892	TE		Genome polyprotein
TraesCS6A01G394100	6A	607 931 133 .. 607 926 933 (-)	4201	G	MF: protein binding; MF: zinc ion binding	Pentatricopeptide repeat-containing protein	Pentatricopeptide repeat; Tetratricopeptide-like helical domain; DYW domain
TraesCS6A01G394200	6A	607 931 222 .. 607 933 664 (+)	2443	G	BP: cell redox homeostasis	Thioredoxin	Thioredoxin-like fold; Thioredoxin domain
TraesCS6A01G394300	6A	607 951 066 .. 607 957 068 (+)	6003	G	MF: RNA binding; MF: binding	Pumilio-like protein	Pumilio RNA-binding repeat; Armadillo-like helical; Nucleic acid binding NABP; Armadillo-type fold; Pumilio homology domain
TraesCS6A01G394400	6A	607 962 879 .. 607 957 477 (-)	5403	G		p-loop containing nucleoside triphosphate hydrolases superfamily protein isoform 2	P-loop containing nucleoside triphosphate hydrolase
TraesCS6A01G394500	6A	607 999 508 .. 607 999 245 (-)	264	TE?		GRF zinc finger family protein
TraesCS6A01G394600	6A	608 055 938 .. 608 056 252 (+)	315	TE?	MF: nucleic acid binding	Disease resistance protein (TIR-NBS-LRR class) family	Ribonuclease H-like domain
TraesCS6A01G394700	6A	608 073 100 .. 608 074 756 (+)	1657	G	MF: protein binding	C2 domain-containing protein	C2 domain
TraesCS6A01G394800	6A	608 082 444 .. 608 077 809 (-)	4636	G		OTU domain-containing protein	OTU domain
TraesCS6A01G394900	6A	608 094 889 .. 608 089 490 (-)	5400	G	MF: protein kinase activity; MF: ATP binding; BP: protein phosphorylation	Protein kinase	Protein kinase domain; Serine-threonine/tyrosine-protein kinase, catalytic domain; Protein kinase-like domain; Protein kinase, ATP binding site
TraesCS6A01G395000	6A	608 113 133 .. 608 118 509 (+)	5377	G	MF: ATP binding; MF: ATPase activity	ABC transporter G family member	ABC transporter-like; AAA+ ATPase domain; IPR017871: ABC transporter, conserved site; P-loop containing nucleoside triphosphate hydrolase
TraesCS6A01G395100	6A	608 120 376 .. 608 118 670 (-)	1707	TE?	MF: zinc ion binding	DNL-type zinc finger protein	Zinc finger, DNL-type
TraesCS6A01G395200	6A	608 125 808 .. 608 125 101 (-)	708	G		Ankyrin repeat family protein	PGG domain
TraesCS6A01G395300	6A	608 217 948 .. 608 216 615 (-)	1334	G		NADH dehydrogenase subunit F
TraesCS6A01G395400	6A	608 279 739 .. 608 279 158 (-)	582	G		Heavy metal-associated protein
TraesCS6A01G395500	6A	608 291 998 .. 608 291 425 (-)	574	G		Ankyrin repeat family protein	PGG domain
TraesCS6A01G395600	6A	608 358 382 .. 608 357 351 (-)	1032	G		Ketol-acid reductoisomerase (NADP(+))	Protein of unknown function DUF594; Domain of unknown function DUF4220
TraesCS6A01G395700	6A	608 367 221 .. 608 369 801 (+)	2581	G		transmembrane protein, putative (DUF594)	Domain of unknown function DUF4220
TraesCS6A01G395800	6A	608 383 037 .. 608 382 059 (-)	979	G		Ankyrin repeat family protein	PGG domain
TraesCS6A01G395900	6A	608 404 562 .. 608 400 434 (-)	4129	G		Ankyrin repeat family protein	PGG domain
TraesCS6A01G396000	6A	608 466 901 .. 608 465 459 (-)	1443	G		Extracellular matrix-binding protein ebh
TraesCS6A01G396100	6A	608 493 863 .. 608 491 070 (-)	2794	G	MF: protein kinase activity; MF: protein serine/threonine kinase activity; MF: ATP binding; BP: protein phosphorylation; BP: recognition of pollen	Serine/threonine-protein kinase	Protein kinase domain; S-locus glycoprotein domain; Bulb-type lectin domain; PAN/Apple domain; Serine/threonine-protein kinase, active site; Protein kinase-like domain; Protein kinase, ATP binding site; S-receptor-like serine/threonine-protein kinase
TraesCS6A01G396200	6A	608 509 870 .. 608 504 870 (-)	5001	G		Ankyrin repeat family protein	PGG domain
TraesCS6A01G396300	6A	608 624 611 .. 608 626 289 (+)	1679	G	MF: protein kinase activity; MF: ATP binding; BP: protein phosphorylation	Kinase family protein	Protein kinase domain; Protein kinase-like domain
TraesCS6A01G396400	6A	608 634 387 .. 608 630 670 (-)	3718	G	MF: hydrolase activity	Serine/threonine-protein phosphatase	Calcineurin-like phosphoesterase domain, ApaH type; Serine/threonine-specific protein phosphatase/bis(5-nucleosyl)-tetraphosphatase; Metallo-dependent phosphatase-like; Serine-threonine protein phosphatase, N-terminal
TraesCS6A01G396500	6A	608 643 655 .. 608 644 087 (+)	433	TE?		zinc finger MYM-type-like protein
TraesCS6A01G396600	6A	608 662 813 .. 608 658 905 (-)	3909	TE?	MF: protein binding	F-box family protein	F-box domain; Leucine-rich repeat domain, L domain-like
TraesCS6A01G396700	6A	608 680 705 .. 608 678 208 (-)	2498	TE?	MF: protein binding	F-box family protein	F-box domain; Leucine-rich repeat domain, L domain-like
TraesCS6A01G396800	6A	608 709 536 .. 608 711 951 (+)	2416	TE?	MF: protein binding	F-box/RNI-like/FBD-like domains-containing protein	F-box domain; Leucine-rich repeat domain, L domain-like
TraesCS6A01G396900	6A	608 793 513 .. 608 791 715 (-)	1799	TE?	MF: protein binding	F-box family protein	F-box domain; Leucine-rich repeat domain, L domain-like
TraesCS6A01G397000	6A	608 861 315 .. 608 859 441 (-)	1875	TE?	MF: protein binding	FBD-associated F-box protein	F-box domain; Leucine-rich repeat domain, L domain-like
TraesCS6A01G397100	6A	608 873 713 .. 608 872 761 (-)	953	G	CC: integral component of membrane	Transport membrane protein	Sec-independent periplasmic protein translocase TatC
TraesCS6A01G397200	6A	608 881 715 .. 608 877 165 (-)	4551	G		NADH-ubiquinone oxidoreductase chain 6
TraesCS6A01G397400	6A	608 902 871 .. 608 900 484 (-)	2388	TE?	MF: protein binding	FBD-associated F-box protein	F-box domain; Leucine-rich repeat domain, L domain-like
TraesCS6A01G397500	6A	608 967 170 .. 608 969 706 (+)	2537	TE?	MF: protein binding	F-box/RNI-like/FBD-like domains-containing protein	F-box domain; Leucine-rich repeat domain, L domain-like
TraesCS6A01G397600	6A	608 977 925 .. 608 979 914 (+)	1990	TE?		F-box/RNI-like/FBD-like domains-containing protein	Leucine-rich repeat domain, L domain-like
TraesCS6A01G397700	6A	609 002 715 .. 609 005 091 (+)	2377	TE?	MF: protein binding	FBD-associated F-box protein	F-box domain; Leucine-rich repeat domain, L domain-like
TraesCS6A01G397800	6A	609 024 213 .. 609 019 975 (-)	4239	G		DNA-directed RNA polymerase subunit beta'
TraesCS6A01G397900	6A	609 031 265 .. 609 032 346 (+)	1082	G	MF: protein binding; MF: zinc ion binding	Ring finger protein, putative	Zinc finger, RING-type; Zinc finger, RING/FYVE/PHD-type
TraesCS6A01G398000	6A	609 037 309 .. 609 032 477 (-)	4833	G	MF: protein binding	Protein KINESIN LIGHT CHAIN-RELATED 3	Tetratricopeptide-like helical domain; Winged helix-turn-helix DNA-binding domain; Tetratricopeptide repeat-containing domain; Tetratricopeptide repeat
TraesCS6A01G398100	6A	609 044 681 .. 609 042 894 (-)	1788	G	MF: transferase activity, transferring acyl groups other than amino-acyl groups	Anthocyanin 5-aromatic acyltransferase	Transferase
TraesCS6A01G398200	6A	609 058 341 .. 609 056 860 (-)	1482	TE?		F-box domain containing protein
TraesCS6A01G398300	6A	609 091 418 .. 609 092 485 (+)	1068	G	MF: protein binding	BTB/POZ domain containing protein, expressed	BTB/POZ domain; MATH/TRAF domain; TRAF-like; SKP1/BTB/POZ domain
TraesCS6A01G398400	6A	609 107 673 .. 609 106 630 (-)	1044	G		LOB domain protein-like	Lateral organ boundaries, LOB
TraesCS6A01G398500	6A	609 112 709 .. 609 109 331 (-)	3379	G		Myosin type-2 heavy chain 2
TraesCS6A01G398600	6A	609 137 469 .. 609 143 588 (+)	6120	G	MF: iron ion binding; MF: oxidoreductase activity, acting on paired donors, with incorporation or reduction of molecular oxygen; MF: heme binding; BP: oxidation-reduction process	Cytochrome P450, putative	Cytochrome P450; Cytochrome P450, E-class, group I; Cytochrome P450, conserved site
TraesCS6A01G398700	6A	609 149 733 .. 609 148 399 (-)	1335	G	MF: nicotianamine synthase activity; BP: nicotianamine biosynthetic process	Nicotianamine synthase	Nicotianamine synthase; S-adenosyl-L-methionine-dependent methyltransferase
TraesCS6A01G398800	6A	609 157 313 .. 609 159 142 (+)	1830	G	MF: hydrolase activity, hydrolyzing O-glycosyl compounds; BP: carbohydrate metabolic process	Glucan endo-1,3-beta-glucosidase, putative	Glycoside hydrolase family 17; X8 domain; Glycoside hydrolase superfamily
TraesCS6A01G398900	6A	609 163 824 .. 609 160 692 (-)	3133	TE?	MF: protein binding	F-box family protein	F-box domain; Leucine-rich repeat domain, L domain-like
TraesCS6A01G399000	6A	609 168 683 .. 609 165 670 (-)	3014	G	MF: binding; BP: peptidyl-lysine modification to peptidyl-hypusine; MF: deoxyhypusine monooxygenase activity	Deoxyhypusine hydroxylase	PBS lyase HEAT-like repeat; IPR011989: Armadillo-like helical; Armadillo-type fold; Deoxyhypusine hydroxylase
TraesCS6A01G399100	6A	609 168 417 .. 609 172 782 (+)	4366	G	MF: protein binding	Bet1-like SNARE 1-1	Target SNARE coiled-coil homology domain
TraesCS6A01G399200	6A	609 175 660 .. 609 177 270 (+)	1611	G		AT hook motif DNA-binding family protein	PPC domain
TraesCS6A01G399300	6A	609 252 680 .. 609 258 301 (+)	5622	G	MF: ATP binding; BP: protein folding; MF: unfolded protein binding	T-complex protein 1 subunit zeta	Chaperonin TCP-1, conserved site; Chaperonin Cpn60/TCP-1 family; T-complex protein 1, zeta subunit; Chaperone tailless complex polypeptide 1 (TCP-1); GroEL-like apical domain; GroEL-like equatorial domain
TraesCS6A01G399400	6A	609 285 023 .. 609 289 188 (+)	4166	G	MF: phosphorelay sensor kinase activity; BP: phosphorelay signal transduction system; MF: protein histidine kinase activity; MF: protein binding; CC: endoplasmic reticulum membrane; BP: signal transduction; BP: negative regulation of ethylene-activated signaling pathway; MF: ethylene receptor activity; BP: response to stimulus; MF: ethylene binding	Ethylene receptor	Signal transduction response regulator, receiver domain; GAF domain; Histidine kinase-like ATPase, C-terminal domain; Signal transduction histidine kinase, dimerisation/phosphoacceptor domain; CheY-like superfamily; Ethylene receptor; GAF domain-like
TraesCS6A01G399500	6A	609 377 988 .. 609 376 212 (-)	1777	G	MF: protein kinase activity; MF: ATP binding; BP: protein phosphorylation	Receptor-like kinase	Protein kinase domain; Serine/threonine-protein kinase, active site; Protein kinase-like domain; Protein kinase, ATP binding site
TraesCS6A01G399600	6A	609 383 684 .. 609 379 672 (-)	4013	G	MF: protein binding; MF: zinc ion binding	RING/U-box superfamily protein, putative	Zinc finger, RING-type; Zinc finger, RING/FYVE/PHD-type; Zinc finger, RING-H2-type
TraesCS6A01G399700	6A	609 403 148 .. 609 401 805 (-)	1344	G	MF: ADP binding	Disease resistance protein RGA2	NB-ARC; P-loop containing nucleoside triphosphate hydrolase
TraesCS6A01G399800	6A	609 417 754 .. 609 425 258 (+)	7505	G	MF: DNA binding	B3 domain-containing protein	B3 DNA binding domain; DNA-binding pseudobarrel domain
TraesCS6A01G399900	6A	609 427 771 .. 609 426 049 (-)	1723	G		NB-ARC domain-containing disease resistance protein	P-loop containing nucleoside triphosphate hydrolase
TraesCS6A01G400000	6A	609 446 489 .. 609 454 302 (+)	7814	G	BP: metabolic process	Aconitate hydratase	Aconitase A/isopropylmalate dehydratase small subunit, swivel domain; Aconitase/3-isopropylmalate dehydratase large subunit, alpha/beta/alpha domain; Aconitase/Iron-responsive element-binding protein 2; Aconitase/3-isopropylmalate dehydratase, swivel; Aconitase/3-isopropylmalate dehydratase large subunit, alpha/beta/alpha, subdomain 1/3; Aconitase/3-isopropylmalate dehydratase large subunit, alph…
TraesCS6A01G400100	6A	609 480 907 .. 609 478 929 (-)	1979	G	BP: drug transmembrane transport; MF: drug transmembrane transporter activity; MF: antiporter activity; CC: membrane; BP: transmembrane transport	Protein DETOXIFICATION	Multi antimicrobial extrusion protein
TraesCS6A01G400200	6A	609 551 300 .. 609 553 421 (+)	2122	G	BP: drug transmembrane transport; MF: drug transmembrane transporter activity; MF: antiporter activity; CC: membrane; BP: transmembrane transport	Protein DETOXIFICATION	Multi antimicrobial extrusion protein
TraesCS6A01G400300	6A	609 559 041 .. 609 561 847 (+)	2807	G	MF: RNA binding; BP: rRNA processing; BP: tRNA processing; MF: methyltransferase activity	rRNA 2'-O-methyltransferase fibrillarin 2	Fibrillarin; Fibrillarin, conserved site; S-adenosyl-L-methionine-dependent methyltransferase
TraesCS6A01G400400	6A	609 566 291 .. 609 564 585 (-)	1707	TE?	MF: protein binding	F-box family protein	F-box domain; Leucine-rich repeat domain, L domain-like
TraesCS6A01G400500	6A	609 573 316 .. 609 577 524 (+)	4209	G	MF: protein binding	Leucine-rich repeat receptor-like protein kinase family protein	Leucine-rich repeat; Leucine-rich repeat, typical subtype; Leucine-rich repeat-containing N-terminal, plant-type; Leucine-rich repeat domain, L domain-like
TraesCS6A01G400600	6A	609 668 761 .. 609 688 894 (+)	20134	G	MF: protein binding	Leucine-rich repeat receptor-like protein kinase family protein	Leucine-rich repeat; Leucine-rich repeat, typical subtype; Leucine-rich repeat-containing N-terminal, plant-type; Leucine-rich repeat domain, L domain-like
TraesCS6A01G400700	6A	609 718 854 .. 609 716 157 (-)	2698	G	MF: protein binding	Leucine-rich repeat receptor-like protein kinase family protein	Leucine-rich repeat; Leucine-rich repeat-containing N-terminal, plant-type; Leucine-rich repeat domain, L domain-like
TraesCS6A01G400800	6A	609 722 475 .. 609 743 218 (+)	20744	G	MF: protein binding	Leucine-rich repeat receptor-like protein kinase family protein	Leucine-rich repeat; Leucine-rich repeat domain, L domain-like
TraesCS6A01G401000	6A	609 790 120 .. 609 797 040 (+)	6921	G	MF: ADP binding	Disease resistance protein (NBS-LRR class) family	NB-ARC; Winged helix-turn-helix DNA-binding domain; P-loop containing nucleoside triphosphate hydrolase; Leucine-rich repeat domain, L domain-like
TraesCS6A01G401200	6A	609 821 758 .. 609 813 735 (-)	8024	G	MF: protein binding	Leucine-rich repeat receptor-like protein kinase family protein	Leucine-rich repeat; Leucine-rich repeat-containing N-terminal, plant-type; Leucine-rich repeat domain, L domain-like
TraesCS6A01G401300	6A	609 886 523 .. 609 883 251 (-)	3273	G	MF: protein kinase activity; MF: ATP binding; BP: protein phosphorylation	Receptor kinase	Protein kinase domain; Serine/threonine-protein kinase, active site; Protein kinase-like domain; Protein kinase, ATP binding site
TraesCS6A01G401400	6A	609 899 787 .. 609 898 210 (-)	1578	TE?		F-box domain containing protein
TraesCS6A01G401500	6A	609 973 926 .. 609 972 318 (-)	1609	G		Mesoderm induction early response protein 1, putative isoform 1
TraesCS6A01G401600	6A	609 983 472 .. 609 982 727 (-)	746	G	CC: nucleosome; MF: DNA binding; CC: nucleus; MF: protein heterodimerization activity	Histone H2A	Histone H2A; Histone H2A/H2B/H3; Histone-fold; IPR032454: Histone H2A, C-terminal domain; Histone H2A conserved site
TraesCS6A01G401700	6A	610 125 036 .. 610 126 483 (+)	1448	G	MF: protein binding	BTB/POZ and MATH domain-containing protein 2	BTB/POZ domain; MATH/TRAF domain; TRAF-like; SKP1/BTB/POZ domain
TraesCS6A01G401800	6A	610 188 197 .. 610 189 888 (+)	1692	TE?	MF: protein binding	F-box family protein	F-box domain
TraesCS6A01G401900	6A	610 196 750 .. 610 200 701 (+)	3952	G		Hydroxyproline-rich glycoprotein-like
TraesCS6A01G402000	6A	610 203 158 .. 610 207 014 (+)	3857	G	CC: integral component of membrane; BP: transmembrane transport	Na(+)/H(+) antiporter NhaB	Citrate transporter-like domain
TraesCS6A01G402100	6A	610 267 294 .. 610 276 559 (+)	9266	G	MF: protein kinase activity; MF: ATP binding; BP: protein phosphorylation	Serine/threonine-protein kinase	Protein kinase domain; Bulb-type lectin domain; PAN/Apple domain; IPR008271: Serine/threonine-protein kinase, active site; Protein kinase-like domain; Protein kinase, ATP binding site
TraesCS6A01G402200	6A	610 282 502 .. 610 280 941 (-)	1562	G	MF: metalloendopeptidase activity; BP: proteolysis	Mitochondrial metalloendopeptidase OMA1	Peptidase M48
TraesCS6A01G402300	6A	610 286 863 .. 610 285 387 (-)	1477	G	MF: metalloendopeptidase activity; BP: proteolysis	Mitochondrial metalloendopeptidase OMA1	Peptidase M48
TraesCS6A01G402400	6A	610 317 058 .. 610 310 025 (-)	7034	G	MF: nucleic acid binding; MF: RNA binding	RNA-binding protein Nova	K Homology domain; K Homology domain, type 1; K homology domain-like, alpha/beta
TraesCS6A01G402500	6A	610 352 296 .. 610 348 775 (-)	3522	G	MF: thiol-dependent ubiquitin-specific protease activity; CC: intracellular; BP: ubiquitin-dependent protein catabolic process; BP: protein deubiquitination	Ubiquitin carboxyl-terminal hydrolase	Peptidase C12, ubiquitin carboxyl-terminal hydrolase; Ubiquitinyl hydrolase, UCH37 type
TraesCS6A01G402600	6A	610 412 979 .. 610 406 498 (-)	6482	G	MF: nucleic acid binding	Oligoribonuclease	Ribonuclease H-like domain; Exonuclease, RNase T/DNA polymerase III
TraesCS6A01G402700	6A	610 509 541 .. 610 512 153 (+)	2613	TE?	MF: protein binding	FBD-associated F-box protein	F-box domain; FBD domain; Leucine-rich repeat domain, L domain-like
TraesCS6A01G402800	6A	610 521 938 .. 610 518 612 (-)	3327	G	MF: ADP binding	Disease resistance protein	NB-ARC; Winged helix-turn-helix DNA-binding domain; P-loop containing nucleoside triphosphate hydrolase; Leucine-rich repeat domain, L domain-like
TraesCS6A01G402900	6A	610 557 540 .. 610 557 917 (+)	378	TE	MF: nucleic acid binding; MF: zinc ion binding	Gag polyprotein	Zinc finger, CCHC-type
TraesCS6A01G403000	6A	610 597 391 .. 610 590 634 (-)	6906	G	MF: ADP binding	Disease resistance protein RPM1	NB-ARC; Winged helix-turn-helix DNA-binding domain; P-loop containing nucleoside triphosphate hydrolase; Leucine-rich repeat domain, L domain-like
TraesCS6A01G403100	6A	610 604 950 .. 610 606 195 (+)	1246	G	MF: nucleic acid binding; BP: nucleobase-containing compound metabolic process; MF: 3'-5' exonuclease activity	Werner Syndrome-like exonuclease	3'-5' exonuclease domain; Ribonuclease H-like domain
TraesCS6A01G403200	6A	610 642 323 .. 610 643 128 (+)	806	G	BP: defense response to bacterium; BP: defense response to fungus	Pathogenesis-related protein PR-4	Barwin domain; RlpA-like protein, double-psi beta-barrel domain; Barwin, conserved site
TraesCS6A01G403300	6A	610 661 368 .. 610 651 847 (-)	9522	G	MF: ADP binding	Disease resistance protein RPM1	NB-ARC; Winged helix-turn-helix DNA-binding domain; P-loop containing nucleoside triphosphate hydrolase; Leucine-rich repeat domain, L domain-like
TraesCS6A01G403400	6A	610 803 292 .. 610 799 758 (-)	3535	G	MF: ADP binding	Disease resistance protein RPM1	NB-ARC; Winged helix-turn-helix DNA-binding domain; P-loop containing nucleoside triphosphate hydrolase; Leucine-rich repeat domain, L domain-like
TraesCS6A01G403500	6A	610 858 523 .. 610 857 192 (-)	1332	G		Remorin	Remorin, C-terminal
TraesCS6A01G403600	6A	610 897 859 .. 610 899 613 (+)	1755	G		P-loop containing nucleoside triphosphate hydrolases superfamily protein
TraesCS6A01G403700	6A	610 902 089 .. 610 906 488 (+)	4400	G	MF: DNA binding	AT hook motif DNA-binding family protein, putative	PPC domain; AT hook, DNA-binding motif
TraesCS6A01G403800	6A	610 929 180 .. 610 930 400 (+)	1221	G		Divinyl reductase	NAD(P)-binding domain
TraesCS6A01G403900	6A	610 934 246 .. 610 931 247 (-)	3000	G	MF: ADP binding	NBS-LRR disease resistance protein	NB-ARC; Winged helix-turn-helix DNA-binding domain; P-loop containing nucleoside triphosphate hydrolase; Leucine-rich repeat domain, L domain-like
TraesCS6A01G404000	6A	610 945 605 .. 610 943 264 (-)	2342	G	MF: ADP binding	Disease resistance protein	NB-ARC; Winged helix-turn-helix DNA-binding domain; P-loop containing nucleoside triphosphate hydrolase; Leucine-rich repeat domain, L domain-like
TraesCS6A01G404100	6A	610 955 537 .. 610 956 043 (+)	507	TE?	MF: DNA binding; MF: zinc ion binding	Zinc finger A20 and AN1 domain-containing stress-associated protein	Zinc finger, AN1-type; Zinc finger, A20-type
TraesCS6A01G404200	6A	610 960 424 .. 610 960 915 (+)	492	TE?	MF: DNA binding; MF: zinc ion binding	Zinc finger A20 and AN1 domain stress-associated protein	Zinc finger, AN1-type; Zinc finger, A20-type
TraesCS6A01G404300	6A	610 988 272 .. 610 990 371 (+)	2100	TE?		Myb/SANT-like DNA-binding domain protein	Myb/SANT-like domain
TraesCS6A01G404400	6A	611 005 103 .. 611 006 575 (+)	1473	TE?		Myb/SANT-like DNA-binding domain protein	Myb/SANT-like domain
TraesCS6A01G404500	6A	611 079 609 .. 611 077 528 (-)	2082	G	MF: iron ion binding; MF: oxidoreductase activity, acting on paired donors, with incorporation or reduction of molecular oxygen; MF: heme binding; BP: oxidation-reduction process	Cytochrome P450	Cytochrome P450; Cytochrome P450, E-class, group I; Cytochrome P450, conserved site
TraesCS6A01G404600	6A	611 197 152 .. 611 198 716 (+)	1565	TE?	MF: nucleic acid binding	Zinc finger family protein	Zinc finger C2H2-type
TraesCS6A01G404700	6A	611 294 090 .. 611 290 222 (-)	3869	G	MF: hydrolase activity	Serine/threonine-protein phosphatase	Calcineurin-like phosphoesterase domain, ApaH type; Serine/threonine-specific protein phosphatase/bis(5-nucleosyl)-tetraphosphatase; Metallo-dependent phosphatase-like; Serine-threonine protein phosphatase, N-terminal
TraesCS6A01G404800	6A	611 302 350 .. 611 297 356 (-)	4995	G	BP: nuclear-transcribed mRNA catabolic process, nonsense-mediated decay	Protein SMG8	Smg8/Smg9
TraesCS6A01G404900	6A	611 310 805 .. 611 307 174 (-)	3632	G		transmembrane protein, putative (DUF594)	Protein of unknown function DUF594; Domain of unknown function DUF4220
TraesCS6A01G405000	6A	611 314 951 .. 611 312 664 (-)	2288	G	MF: Rho guanyl-nucleotide exchange factor activity	Rop guanine nucleotide exchange factor, putative	PRONE domain
TraesCS6A01G405100	6A	611 322 212 .. 611 316 023 (-)	6190	G	MF: protein binding	Smad/FHA domain protein	Forkhead-associated (FHA) domain; SMAD/FHA domain
TraesCS6A01G405200	6A	611 330 649 .. 611 328 418 (-)	2232	G	MF: methyltransferase activity; MF: O-methyltransferase activity	O-methyltransferase	O-methyltransferase, family 2; Winged helix-turn-helix DNA-binding domain; O-methyltransferase COMT-type; S-adenosyl-L-methionine-dependent methyltransferase
TraesCS6A01G405300	6A	611 336 170 .. 611 334 650 (-)	1521	G		Disease resistance protein RPM1	Winged helix-turn-helix DNA-binding domain; Leucine-rich repeat domain, L domain-like
TraesCS6A01G405400	6A	611 416 350 .. 611 410 194 (-)	6157	G	MF: protein binding; MF: zinc ion binding	RING/U-box superfamily protein	Zinc finger, RING-type
TraesCS6A01G405500	6A	611 492 606 .. 611 483 098 (-)	9509	G	MF: DNA binding; MF: protein binding;GO:0005634 CC: nucleus; MF: oxidoreductase activity; BP: oxidation-reduction process	Lysine-specific histone demethylase 1-3-like protein	Amine oxidase; SWIRM domain; Homeobox domain-like; Winged helix-turn-helix DNA-binding domain; Transcription factor IIS, N-terminal; FAD/NAD(P)-binding domain
TraesCS6A01G405600	6A	611 513 232 .. 611 514 823 (+)	1592	G	MF: transporter activity; BP: transport; CC: membrane	Aquaporin	Major intrinsic protein; Major intrinsic protein, conserved site; Aquaporin-like
TraesCS6A01G405700	6A	611 523 329 .. 611 521 657 (-)	1673	G	MF: transporter activity; BP: transport; CC: membrane	Aquaporin	Major intrinsic protein; Major intrinsic protein, conserved site; Aquaporin-like
TraesCS6A01G405800	6A	611 533 101 .. 611 536 885 (+)	3785	G	BP: protein peptidyl-prolyl isomerization; MF: peptidyl-prolyl cis-trans isomerase activity; MF: protein binding; BP: protein folding	Peptidyl-prolyl cis-trans isomerase	F-box domain; Cyclophilin-type peptidyl-prolyl cis-trans isomerase domain; Cyclophilin-type peptidyl-prolyl cis-trans isomerase, conserved site; Cyclophilin-like domain
TraesCS6A01G405900	6A	611 541 075 .. 611 541 578 (+)	504	G	BP: protein peptidyl-prolyl isomerization; MF: peptidyl-prolyl cis-trans isomerase activity; BP: protein folding	Peptidyl-prolyl cis-trans isomerase	Cyclophilin-type peptidyl-prolyl cis-trans isomerase domain; Cyclophilin-type peptidyl-prolyl cis-trans isomerase, conserved site; Cyclophilin-type peptidyl-prolyl cis-trans isomerase; Cyclophilin-like domain
TraesCS6A01G406000	6A	611 569 384 .. 611 563 491 (-)	5894	G	MF: aspartic-type endopeptidase activity; CC: integral component of membrane	Signal peptide peptidase-like protein	PA domain; Presenilin/signal peptide peptidase; Peptidase A22B, signal peptide peptidase
TraesCS6A01G406100	6A	611 577 930 .. 611 575 953 (-)	1978	G		Glutamyl-tRNA(Gln) amidotransferase subunit C
TraesCS6A01G406200	6A	611 656 393 .. 611 660 966 (+)	4574	G	BP: negative regulation of translation; MF: rRNA N-glycosylase activity	rRNA N-glycosidase	Ribosome-inactivating protein; Ribosome-inactivating protein, subdomain 1
TraesCS6A01G406300	6A	611 666 132 .. 611 663 788 (-)	2345	G		Glutamyl-tRNA(Gln) amidotransferase subunit C
TraesCS6A01G406400	6A	611 709 031 .. 611 714 835 (+)	5805	G	MF: protein binding	Acyl-CoA-binding domain-containing protein 4	Kelch repeat type 1; Kelch-type beta propeller
TraesCS6A01G406500	6A	611 805 720 .. 611 808 712 (+)	2993	G	MF: structural constituent of ribosome; CC: intracellular; CC: ribosome; BP: translation	50S ribosomal protein L9	Ribosomal protein L9/RNase H1, N-terminal; Ribosomal protein L9, C-terminal; Ribosomal protein L9, N-terminal; Ribosomal protein L9, bacteria/chloroplast
TraesCS6A01G406600	6A	611 849 992 .. 611 856 410 (+)	6419	G	MF: ATP binding; MF: phosphatidylinositol phosphate kinase activity; MF: 1-phosphatidylinositol-4-phosphate 5-kinase activity; BP: phosphatidylinositol metabolic process	Phosphatidylinositol-4-phosphate 5-kinase, putative	Phosphatidylinositol-4-phosphate 5-kinase, core; MORN motif; Phosphatidylinositol-4-phosphate 5-kinase, plant; Phosphatidylinositol-4-phosphate 5-kinase, C-terminal; Phosphatidylinositol-4-phosphate 5-kinase, N-terminal domain
TraesCS6A01G406700	6A	611 861 487 .. 611 856 943 (-)	4545	G	MF: DNA binding; BP: regulation of transcription, DNA-templated	NAC domain protein,	NAC domain
TraesCS6A01G406800	6A	611 901 255 .. 611 904 045 (+)	2791	TE?	MF: protein binding	F-box family protein	F-box domain; Leucine-rich repeat domain, L domain-like
TraesCS6A01G406900	6A	612 112 184 .. 612 106 980 (-)	5205	TE?	MF: protein binding	F-box family protein	F-box domain; Leucine-rich repeat domain, L domain-like
TraesCS6A01G407000	6A	612 126 029 .. 612 122 805 (-)	3225	TE?	MF: protein binding	F-box family protein	F-box domain; Leucine-rich repeat domain, L domain-like
TraesCS6A01G407100	6A	612 170 687 .. 612 169 407 (-)	1281	G		2,3-bisphosphoglycerate-independent phosphoglycerate mutase	Leucine-rich repeat domain, L domain-like
TraesCS6A01G407200	6A	612 180 757 .. 612 177 309 (-)	3449	G		Hepatocellular carcinoma-associated antigen 59 family protein, expressed	Hepatocellular carcinoma-associated antigen 59
TraesCS6A01G407300	6A	612 186 654 .. 612 189 894 (+)	3241	G		Hepatocellular carcinoma-associated antigen 59 family protein, expressed	Hepatocellular carcinoma-associated antigen 60
TraesCS6A01G407400	6A	612 192 841 .. 612 192 569 (-)	273	TE		RNase H family protein
TraesCS6A01G407500	6A	612 290 538 .. 612 293 567 (+)	3030	TE?	MF: protein binding	F-box family protein	F-box domain; Leucine-rich repeat domain, L domain-like
TraesCS6A01G407600	6A	612 299 286 .. 612 302 476 (+)	3191	TE?	MF: protein binding	F-box family protein	F-box domain; Leucine-rich repeat domain, L domain-like
TraesCS6A01G407700	6A	612 332 960 .. 612 327 666 (-)	5295	G		Lactoperoxidase
TraesCS6A01G407800	6A	612 570 554 .. 612 567 358 (-)	3197	G		U3 small nucleolar RNA-associated protein 25	Leucine-rich repeat domain, L domain-like
QGpc.ippg-6B.1
TraesCS6B01G251200	6B	450 605 055 .. 450 589 211 (-)	16083	G	MF: protein binding	Leucine-rich repeat (LRR) family protein	Leucine-rich repeat; Leucine-rich repeat, cysteine-containing subtype; Leucine-rich repeat domain, L domain-like
TraesCS6B01G251300	6B	450 641 449 .. 450 637 579 (-)	3871	G	BP: pseudouridine synthesis; BP: ribosome biogenesis	H/ACA ribonucleoprotein complex non-core subunit NAF1	H/ACA ribonucleoprotein complex, subunit Gar1/Naf1; Translation protein, beta-barrel domain
TraesCS6B01G251400	6B	450 653 506 .. 450 643 557 (-)	9950	G	MF: protein binding	Ubiquitin carboxyl-terminal hydrolase, putative	MATH/TRAF domain; TRAF-like
TraesCS6B01G251500	6B	450 894 614 .. 450 899 277 (+)	4664	G	CC: intracellular; BP: transport; BP: ER to Golgi vesicle-mediated transport	Trafficking protein particle complex subunit 2	Trafficking protein particle complex subunit 2; Longin-like domain
TraesCS6B01G251600	6B	451 472 583 .. 451 480 460 (+)	7878	G	MF: adenine phosphoribosyltransferase activity; CC: cytoplasm; BP: adenine salvage; BP: nucleoside metabolic process	Adenine phosphoribosyltransferase	Phosphoribosyltransferase domain; Adenine phosphoribosyl transferase; Phosphoribosyltransferase-like
TraesCS6B01G251700	6B	451 671 956 .. 451 674 810 (+)	2855	G		Caveolin-1
TraesCS6B01G251800	6B	451 924 865 .. 451 927 187 (+)	2323	G		histone acetyltransferase of the CBP family 12
TraesCS6B01G251900	6B	451 933 608 .. 451 927 734 (-)	6158	G		UDP-sugar transporter-like protein	Sugar phosphate transporter domain
TraesCS6B01G252000	6B	452 171 125 .. 452 177 168 (+)	6044	G	MF: DNA binding; MF: transcription factor activity, sequence-specific DNA binding; BP: regulation of transcription, DNA-templated	AP2-like ethylene-responsive transcription factor	AP2/ERF domain; DNA-binding domain
TraesCS6B01G252100	6B	452 184 685 .. 452 187 884 (+)	3200	G		Protein TIC 20, chloroplastic	Chloroplast protein import component Tic20
TraesCS6B01G252200	6B	452 191 939 .. 452 188 474 (-)	3466	G		Transporter-related family protein	Sugar phosphate transporter domain
TraesCS6B01G252300	6B	452 528 786 .. 452 533 033 (+)	4248	G		Filament-like plant protein	Filament-like plant protein
TraesCS6B01G252400	6B	452 594 984 .. 452 595 290 (+)	307	TE	MF: protein dimerization activity	TTF-type zinc finger protein with HAT dimerization domain-containing protein	HAT, C-terminal dimerisation domain
TraesCS6B01G252500	6B	452 618 531 .. 452 616 403 (-)	2129	G		SPla/RYanodine receptor (SPRY) domain protein
TraesCS6B01G252600	6B	452 620 575 .. 452 620 288 (-)	288	G	MF: DNA binding	B3 domain-containing protein family	B3 DNA binding domain; DNA-binding pseudobarrel domain
TraesCS6B01G252700	6B	453 163 385 .. 453 163 933 (+)	549	TE?		GRF zinc finger family protein
TraesCS6B01G252800	6B	453 276 621 .. 453 280 677 (+)	4057	G	MF: protein kinase activity; MF: protein binding; MF: ATP binding; BP: protein phosphorylation	Receptor-kinase, putative	Protein kinase domain; Leucine-rich repeat; Leucine-rich repeat, typical subtype; Protein kinase-like domain; Leucine-rich repeat-containing N-terminal, plant-type; Protein kinase, ATP binding site; Leucine-rich repeat domain, L domain-like
TraesCS6B01G252900	6B	453 930 737 .. 453 932 389 (+)	1653	G		Leucine-rich repeat protein kinase family protein	Leucine-rich repeat domain, L domain-like
TraesCS6B01G253000	6B	454 028 606 .. 454 023 437 (-)	6064	G		methyl-coenzyme M reductase II subunit gamma, putative (DUF3741)	Domain of unknown function DUF3741; Domain of unknown function DUF4378; DUF3741-associated sequence motif
TraesCS6B01G253100	6B	454 078 933 .. 454 075 257 (-)	3677	G		Protein HIR1
TraesCS6B01G253200	6B	454 525 655 .. 454 501 703 (-)	23953	G	MF: binding; MF: protein binding	CLIP-associating family protein	HEAT repeat; Armadillo-like helical; Armadillo-type fold; HEAT, type 2; CLASP N-terminal domain; TOG domain
TraesCS6B01G253300	6B	454 717 845 .. 454 750 578 (+)	32734	G	MF: serine-type endopeptidase activity; BP: proteolysis; MF: serine-type peptidase activity; MF: serine-type exopeptidase activity	Prolyl oligopeptidase family protein	Peptidase S9, prolyl oligopeptidase, catalytic domain; Peptidase S9A, prolyl oligopeptidase; Peptidase S9A, N-terminal domain; Alpha/Beta hydrolase fold
TraesCS6B01G253400	6B	455 075 778 .. 455 085 228 (+)	9451	G	BP: transmembrane transport	Oligopeptide transporter, putative	Oligopeptide transporter, OPT superfamily
TraesCS6B01G253500	6B	455 413 656 .. 455 416 208 (+)	2553	G	MF: hydrolase activity, acting on ester bonds	GDSL esterase/lipase	GDSL lipase/esterase; SGNH hydrolase-type esterase domain
TraesCS6B01G253600	6B	455 430 897 .. 455 417 355 (-)	13543	G	MF: 3'-5'-exoribonuclease activity; MF: nucleic acid binding; MF: RNA binding; MF: polyribonucleotide nucleotidyltransferase activity; BP: RNA processing; BP: mRNA catabolic process	Polyribonucleotide nucleotidyltransferase	Exoribonuclease, phosphorolytic domain 1; S1 domain; Polyribonucleotide nucleotidyltransferase; Nucleic acid-binding, OB-fold; Exoribonuclease, phosphorolytic domain 2; Polyribonucleotide nucleotidyltransferase, RNA-binding domain; Ribosomal protein S5 domain 2-type fold; RNA-binding domain, S1; PNPase/RNase PH domain
TraesCS6B01G253700	6B	456 210 921 .. 456 208 347 (-)	2575	G		peroxin 3-1	Domain of unknown function DUF1618
TraesCS6B01G253800	6B	456 300 416 .. 456 297 852 (-)	2565	G		peroxin 3-1	Domain of unknown function DUF1618
TraesCS6B01G253900	6B	457 168 720 .. 457 171 746 (+)	3027	G	BP: phosphorelay signal transduction system; MF: protein binding	response regulator 1	Signal transduction response regulator, receiver domain; CCT domain; CheY-like superfamily
TraesCS6B01G254000	6B	457 174 932 .. 457 173 114 (-)	1819	G	BP: pseudouridine synthesis; MF: snoRNA binding; BP: ribosome biogenesis	H/ACA ribonucleoprotein complex subunit 3-like protein	H/ACA ribonucleoprotein complex, subunit Nop10
TraesCS6B01G254100	6B	457 214 128 .. 457 213 577 (-)	552	TE?		GRF zinc finger / Zinc knuckle protein
TraesCS6B01G254200	6B	457 217 373 .. 457 216 008 (-)	1366	G	MF: DNA binding	Myb transcription factor	SANT/Myb domain; Homeobox domain-like; Myb domain
TraesCS6B01G254300	6B	457 309 617 .. 457 311 397 (+)	1781	G	CC: integral component of membrane	Lung seven transmembrane receptor, putative	Lung seven transmembrane receptor-like
TraesCS6B01G254400	6B	457 425 431 .. 457 419 257 (-)	6175	TE?	MF: protein binding; MF: zinc ion binding	Zinc finger (C3HC4-type RING finger) family protein	Zinc finger, RING-type; von Willebrand factor, type A; Zinc finger, RING/FYVE/PHD-type; VWA-Hint protein, Vwaint domain
QGpc.ippg-6B.2
TraesCS6B01G323900	6B	573 161 954 .. 573 159 329 (-)	2626	G		Plastid movement impaired protein	Protein of unknown function DUF4228, plant
TraesCS6B01G324000	6B	573 328 223 .. 573 324 079 (-)	4145	G	MF: ubiquitin-protein transferase activity; MF: binding; MF: protein binding; BP: protein ubiquitination	U-box domain-containing protein	Armadillo; U box domain; Armadillo-like helical; Zinc finger, RING/FYVE/PHD-type; Armadillo-type fold
TraesCS6B01G324100	6B	573 348 662 .. 573 348 985 (+)	324	TE		Retrotransposon protein, putative, unclassified
TraesCS6B01G324200	6B	573 415 064 .. 573 413 610 (-)	1455	G	MF: catalytic activity; BP: fatty acid biosynthetic process; BP: metabolic process; CC: membrane; MF: transferase activity, transferring acyl groups other than amino-acyl groups	3-ketoacyl-CoA synthase	Very-long-chain 3-ketoacyl-CoA synthase; FAE1/Type III polyketide synthase-like protein; 3-Oxoacyl-[acyl-carrier-protein (ACP)] synthase III, C-terminal; Thiolase-like
TraesCS6B01G324300	6B	573 682 194 .. 573 684 148 (+)	1955	G		Jasmonate ZIM domain-containing protein	Tify domain; CO/COL/TOC1, conserved site
TraesCS6B01G324400	6B	573 691 186 .. 573 689 158 (-)	2029	G	MF: GTP binding; CC: intracellular; BP: small GTPase mediated signal transduction	ADP-ribosylation factor, putative	Small GTP-binding protein domain; Small GTPase superfamily, ARF/SAR type; Small GTPase superfamily, ARF type; P-loop containing nucleoside triphosphate hydrolase
TraesCS6B01G324500	6B	573 741 781 .. 573 741 436 (-)	346	TE		Retrotransposon protein, putative, unclassified
TraesCS6B01G324600	6B	574 021 617 .. 574 020 299 (-)	1319	G	MF: DNA binding	Myb related transcription factor	SANT/Myb domain; Homeobox domain-like; Myb domain
TraesCS6B01G324700	6B	574 037 515 .. 574 022 515 (-)	15001	G		Mediator of RNA polymerase II transcription subunit 23	Mediator complex, subunit Med23
TraesCS6B01G324800	6B	574 459 083 .. 574 465 329 (+)	6247	G	MF: potassium ion transmembrane transporter activity; CC: membrane; BP: potassium ion transmembrane transport	Potassium transporter	Potassium transporter
TraesCS6B01G324900	6B	574 521 329 .. 574 521 862 (+)	534	G		Phosphatidylinositol 3- and 4-kinase family protein
TraesCS6B01G325000	6B	574 627 077 .. 574 627 969 (+)	893	G		NADH-ubiquinone reductase complex 1 MLRQ subunit
TraesCS6B01G325100	6B	574 634 736 .. 574 633 939 (-)	798	G		L-lactate dehydrogenase A chain
TraesCS6B01G325200	6B	574 660 673 .. 574 663 830 (+)	3158	G	MF: RNA binding	APO protein 2	APO domain
TraesCS6B01G325300	6B	574 665 540 .. 574 664 107 (-)	1434	G	BP: microtubule-based process; CC: dynein complex	Dynein light chain	Dynein light chain, type 1/2
TraesCS6B01G325400	6B	574 714 813 .. 574 717 839 (+)	3027	G	MF: catalytic activity; MF: hydrolase activity, hydrolyzing O-glycosyl compounds; BP: carbohydrate metabolic process	Endoglucanase	Glycoside hydrolase family 9; Six-hairpin glycosidase-like; Glycoside hydrolase family 9, His active site; Glycosyl hydrolases family 9, Asp/Glu active sites
TraesCS6B01G325500	6B	574 725 602 .. 574 724 556 (-)	1047	G		transmembrane protein
TraesCS6B01G325600	6B	574 736 323 .. 574 735 817 (-)	507	G	MF: calcium ion binding	Calcium-binding protein	EF-hand domain; EF-hand domain pair; EF-Hand 1, calcium-binding site
TraesCS6B01G325700	6B	575 314 627 .. 575 316 346 (+)	1720	G		senescence-associated family protein, putative (DUF581)	Zf-FLZ domain
TraesCS6B01G325800	6B	575 321 220 .. 575 322 869 (+)	1650	G		senescence-associated family protein, putative (DUF581)	Zf-FLZ domain
TraesCS6B01G325900	6B	575 326 614 .. 575 330 291 (+)	3678	G	MF: protein binding	Protein N-methyltransferase	SET domain; Rubisco LSMT, substrate-binding domain
TraesCS6B01G326000	6B	575 331 220 .. 575 330 987 (-)	234	G		NAD(P)-binding Rossmann-fold superfamily protein
TraesCS6B01G326100	6B	575 379 809 .. 575 377 927 (-)	1883	G	MF: calcium ion binding	Caleosin	EF-hand domain; Caleosin-related
TraesCS6B01G326200	6B	575 638 067 .. 575 639 482 (+)	1416	G	MF: hydrolase activity	Nudix hydrolase-like protein	NUDIX hydrolase domain; NUDIX hydrolase domain-like; NUDIX hydrolase, conserved site
TraesCS6B01G326300	6B	575 925 380 .. 575 926 982 (+)	1603	G	MF: calcium ion binding	Caleosin	EF-hand domain; Caleosin-related; IPR011992: EF-hand domain pair
TraesCS6B01G326400	6B	575 929 198 .. 575 929 473 (+)	276	TE	MF: nucleic acid binding	Pol polyprotein	Ribonuclease H-like domain
TraesCS6B01G326500	6B	576 039 327 .. 576 041 441 (+)	2115	G	MF: calcium ion binding	Caleosin	EF-hand domain; Caleosin-related
TraesCS6B01G326600	6B	576 207 736 .. 576 206 300 (-)	1437	G		DUF1005 family protein (DUF1005)	Protein of unknown function DUF1005
TraesCS6B01G326700	6B	576 269 335 .. 576 268 168 (-)	1168	G	MF: oxidoreductase activity; BP: oxidation-reduction process	2-oxoglutarate-dependent dioxygenase-related family protein	Oxoglutarate/iron-dependent dioxygenase; Isopenicillin N synthase-like
TraesCS6B01G326800	6B	576 361 891 .. 576 362 981 (+)	1091	G		Cysteine-rich repeat secretory protein	Gnk2-homologous domain
TraesCS6B01G326900	6B	576 574 025 .. 576 572 240 (-)	1786	G		Cyclin-dependent kinase 1
TraesCS6B01G327000	6B	576 608 718 .. 576 609 333 (+)	616	G		Tetratricopeptide repeat (TPR)-like superfamily protein
TraesCS6B01G327100	6B	576 812 582 .. 576 813 295 (+)	714	G		B-cell receptor-associated-like protein
TraesCS6B01G327200	6B	576 827 367 .. 576 826 073 (-)	1295	G	MF: electron carrier activity	Blue copper protein	Phytocyanin domain; Cupredoxin; Blue (type 1) copper protein, binding site
TraesCS6B01G327300	6B	576 854 821 .. 576 850 231 (-)	4591	G		Allergen, putative
TraesCS6B01G327400	6B	577 170 386 .. 577 175 054 (+)	4669	G	MF: metalloendopeptidase activity; BP: proteolysis	Mitochondrial metalloendopeptidase OMA1	Peptidase M48
TraesCS6B01G327500	6B	577 187 787 .. 577 183 711 (-)	4077	G	MF: catalytic activity; MF: glutamate-ammonia ligase activity; BP: glutamine biosynthetic process; BP: nitrogen compound metabolic process	Glutamine synthetase	Glutamine synthetase, catalytic domain; Glutamine synthetase, beta-Grasp domain; Glutamine synthetase/guanido kinase, catalytic domain; Glutamine synthetase, N-terminal conserved site; Glutamine synthetase, glycine-rich site
TraesCS6B01G327600	6B	577 356 234 .. 577 360 011 (+)	3778	G	MF: protein binding	Ankyrin repeat-containing protein	Ankyrin repeat; Ankyrin repeat-containing domain; PGG domain
TraesCS6B01G327700	6B	577 362 296 .. 577 365 093 (+)	2798	G	MF: protein binding	Pentatricopeptide repeat-containing protein	Pentatricopeptide repeat; Tetratricopeptide-like helical domain
TraesCS6B01G327800	6B	577 367 692 .. 577 365 017 (-)	2676	G	MF: protein binding; MF: zinc ion binding	RING-finger ubiquitin ligase	Zinc finger, RING-type; Zinc finger, RING/FYVE/PHD-type
TraesCS6B01G327900	6B	577 374 031 .. 577 372 715 (-)	1317	G	MF: catalytic activity; BP: metabolic process	Chalcone synthase	Chalcone/stilbene synthase, N-terminal; Chalcone/stilbene synthase, C-terminal; Thiolase-like
[truncated: 58 more rows]

## Sheet: Table-S10-Candidate-genes-TKW
Table S10. Candidate genes inside QTL and in the LD-supported interval of the stable QTNs for thousand kernel weight (TKW)
[truncated: 2,738 more rows]
